# Supplementary material for: Time intervals and routes to diagnosis for lung cancer in 10 jurisdictions: cross-sectional study findings from the International Cancer Benchmarking Partnership (ICBP)
Source: PubMed Central journal article supplement (PMC6886977; doi:10.1136/bmjopen-2018-025895), 2019-11-27
Supplement: bmjopen-2018-025895.draft_revisions.pdf [file bmjopen-2018-025895.draft_revisions.pdf]

# BMJ Open

BMJ Open is committed to open peer review. As part of this commitment we make the peer review history of every article we publish publicly available.

When an article is published we post the peer reviewers' comments and the authors' responses online. We also post the versions of the paper that were used during peer review. These are the versions that the peer review comments apply to.

The versions of the paper that follow are the versions that were submitted during the peer review process. They are not the versions of record or the final published versions. They should not be cited or distributed as the published version of this manuscript.

BMJ Open is an open access journal and the full, final, typeset and author-corrected version of record of the manuscript is available on our site with no access controls, subscription charges or pay-per-view fees (<http://bmjopen.bmj.com>).

If you have any questions on BMJ Open's open peer review process please email [info.bmjopen@bmj.com](mailto:info.bmjopen@bmj.com)

# BMJ Open

## Time intervals and routes to diagnosis for lung cancer in ten jurisdictions: cross-sectional study findings from the International Cancer Benchmarking Partnership (ICBP)

|                               |                                                                                                                                                                                                                                                                                                                                                                                                                                                                                                                                                                                                                                                                                                                                                                                                                                                                                                                                                                                                                                                                                                                                                                                                                                                                                                                                                                                                                                                                                                                                                                                                                                                                                                                                                                                                                                                                                                                                                                                                                                                                                                                                                                                                                                                                                                                                                                                                               |
|-------------------------------|---------------------------------------------------------------------------------------------------------------------------------------------------------------------------------------------------------------------------------------------------------------------------------------------------------------------------------------------------------------------------------------------------------------------------------------------------------------------------------------------------------------------------------------------------------------------------------------------------------------------------------------------------------------------------------------------------------------------------------------------------------------------------------------------------------------------------------------------------------------------------------------------------------------------------------------------------------------------------------------------------------------------------------------------------------------------------------------------------------------------------------------------------------------------------------------------------------------------------------------------------------------------------------------------------------------------------------------------------------------------------------------------------------------------------------------------------------------------------------------------------------------------------------------------------------------------------------------------------------------------------------------------------------------------------------------------------------------------------------------------------------------------------------------------------------------------------------------------------------------------------------------------------------------------------------------------------------------------------------------------------------------------------------------------------------------------------------------------------------------------------------------------------------------------------------------------------------------------------------------------------------------------------------------------------------------------------------------------------------------------------------------------------------------|
| Journal:                      | <i>BMJ Open</i>                                                                                                                                                                                                                                                                                                                                                                                                                                                                                                                                                                                                                                                                                                                                                                                                                                                                                                                                                                                                                                                                                                                                                                                                                                                                                                                                                                                                                                                                                                                                                                                                                                                                                                                                                                                                                                                                                                                                                                                                                                                                                                                                                                                                                                                                                                                                                                                               |
| Manuscript ID                 | bmjopen-2018-025895                                                                                                                                                                                                                                                                                                                                                                                                                                                                                                                                                                                                                                                                                                                                                                                                                                                                                                                                                                                                                                                                                                                                                                                                                                                                                                                                                                                                                                                                                                                                                                                                                                                                                                                                                                                                                                                                                                                                                                                                                                                                                                                                                                                                                                                                                                                                                                                           |
| Article Type:                 | Research                                                                                                                                                                                                                                                                                                                                                                                                                                                                                                                                                                                                                                                                                                                                                                                                                                                                                                                                                                                                                                                                                                                                                                                                                                                                                                                                                                                                                                                                                                                                                                                                                                                                                                                                                                                                                                                                                                                                                                                                                                                                                                                                                                                                                                                                                                                                                                                                      |
| Date Submitted by the Author: | 14-Aug-2018                                                                                                                                                                                                                                                                                                                                                                                                                                                                                                                                                                                                                                                                                                                                                                                                                                                                                                                                                                                                                                                                                                                                                                                                                                                                                                                                                                                                                                                                                                                                                                                                                                                                                                                                                                                                                                                                                                                                                                                                                                                                                                                                                                                                                                                                                                                                                                                                   |
| Complete List of Authors:     | <p>Menon, Usha; University College London, Institute for Women's Health<br/> Vedsted, Peter; Aarhus University, Research Unit for General Practice<br/> Zalounina Falborg, Alina; Aarhus University, Research Unit for General Practice<br/> Jensen, Henry; Aarhus University, Research Unit for General Practice<br/> Harrison, Samantha; Cancer Research UK, Policy &amp; information<br/> Reguilon, Irene; Cancer Research UK, Policy &amp; information<br/> Barisic, Andriana; Cancer Care Ontario<br/> Bergin, Rebecca; Cancer Council Victoria, Centre for Behavioural Research in Cancer; University of Melbourne, Department of General Practice<br/> Brewster, David; Edinburgh University, Centre for Population Health Sciences; NHS Scotland National Services Division, Scottish Cancer Registry, Information Services Division<br/> Butler, John; The Royal Marsden<br/> Brustugun, Odd Terje; Oslo University Hospital, Institute for Cancer Research<br/> Bucher, Oliver; CancerCare Manitoba, Department of Epidemiology and Cancer Registry<br/> Cairnduff, Victoria; Queen's University Belfast, Northern Ireland Cancer Registry<br/> Gavin, Anna; Queen's University Belfast, Northern Ireland Cancer Registry<br/> Grunfeld, Eva; Ontario Institute for Cancer Research, Health Services Research Program<br/> Harland, Elizabeth; CancerCare Manitoba, Department of Epidemiology and Cancer Registry<br/> Kalsi, Jatinderpal; University College London, Institute for Women's Health<br/> Knudsen, Anne Kari; Oslo University Hospital, European Palliative Care Research Centre (PRC); University of Oslo, Institute of Clinical Medicine<br/> Lambe, Mats; Karolinska Institutet, Department of Medical Epidemiology; University Hospital, Regional Oncologic Center<br/> Law, Rebecca-Jane; Bangor University, North Wales Centre for Primary Care Research<br/> Lin, Yulan; University of Oslo, Institute of Clinical Medicine; Oslo University Hospital, European Palliative Care Research Centre (PRC)<br/> Malmberg, Martin; Skanes universitetssjukhus Lund<br/> Turner, Donna; CancerCare Manitoba<br/> Neal, RD; Bangor University, North Wales Centre for Primary Care Research; University of Leeds, Academic Unit of Primary Care<br/> White, Victoria; Cancer Council Victoria, Centre for Behavioural Research in Cancer; Deakin University, School of Psychology</p> |

1  
2  
3  
4  
5  
6  
7  
8  
9  
10  
11  
12  
13  
14  
15  
16  
17  
18  
19  
20  
21  
22  
23  
24  
25  
26  
27  
28  
29  
30  
31  
32  
33  
34  
35  
36  
37  
38  
39  
40  
41  
42  
43  
44  
45  
46  
47  
48  
49  
50  
51  
52  
53  
54  
55  
56  
57  
58  
59  
60

|           |                                                                                                                                                                                                                |
|-----------|----------------------------------------------------------------------------------------------------------------------------------------------------------------------------------------------------------------|
|           | Weller, David; Edinburgh University, Centre for Population Health Sciences                                                                                                                                     |
| Keywords: | EPIDEMIOLOGY, International health services < HEALTH SERVICES ADMINISTRATION & MANAGEMENT, Organisation of health services < HEALTH SERVICES ADMINISTRATION & MANAGEMENT, Respiratory tract tumours < ONCOLOGY |
|           |                                                                                                                                                                                                                |

SCHOLARONE™  
Manuscripts

For peer review only

1  
2  
3 **Time intervals and routes to diagnosis for lung cancer in ten jurisdictions: cross-**  
4 **sectional study findings from the International Cancer Benchmarking Partnership**  
5 **(ICBP)**  
6  
7

- 8 1. Usha Menon\*, Institute for Women's Health, University College London, London, United  
9 Kingdom
- 10 2. Peter Vedsted\*, Research Unit for General Practice, Aarhus University, Aarhus,  
11 Denmark
- 12 3. Alina Zalounina Falborg, Research Unit for General Practice, Aarhus University, Aarhus,  
13 Denmark
- 14 4. Henry Jensen, Research Unit for General Practice, Aarhus University, Aarhus, Denmark
- 15 5. Samantha Harrison, Policy and Information, Cancer Research UK, London, United  
16 Kingdom
- 17 6. Irene Reguilon, Policy and Information, Cancer Research UK, London, United Kingdom
- 18 7. Andriana Barisic, Ontario Renal Network, Cancer Care Ontario, Toronto, Canada
- 19 8. Rebecca J Bergin, Centre for Behavioural Research in Cancer, Cancer Council Victoria,  
20 Victoria, Australia; Department of General Practice, University of Melbourne, Victoria,  
21 Australia
- 22 9. David H Brewster, Scottish Cancer Registry, Information Services Division, NHS  
23 National Services Scotland, Edinburgh, United Kingdom; Centre for Population Health  
24 Sciences, University of Edinburgh, Edinburgh, United Kingdom
- 25 10. John Butler, The Royal Marsden, Fulham Road, London, United Kingdom
- 26 11. Odd Terje Brustugun, Institute for Cancer Research, Department of Cancer Genetics,  
27 Oslo University Hospital, Oslo, Norway
- 28 12. Oliver Bucher, Department of Epidemiology and Cancer Registry, CancerCare Manitoba,  
29 Manitoba
- 30 13. Victoria Cairnduff, Northern Ireland Cancer Registry, Centre for Public Health, Queen's  
31 University Belfast, Mulhouse Building, Mulhouse Road, Belfast, United Kingdom
- 32 14. Anna T Gavin, Northern Ireland Cancer Registry, Queen's University Belfast, Belfast,  
33 United Kingdom
- 34 15. Eva Grunfeld, Health Services Research Program, Ontario Institute for Cancer  
35 Research, Toronto, Canada
- 36 16. Elizabeth Harland, Department of Epidemiology and Cancer Registry, CancerCare  
37 Manitoba, Winnipeg, Canada
- 38 17. Jatinderpal Kalsi, Gynaecological Cancer Research Centre, Women's Cancer, Institute  
39 for Women's Health, University College London, London, United Kingdom
- 40
- 41
- 42
- 43
- 44
- 45
- 46
- 47
- 48
- 49
- 50
- 51
- 52
- 53
- 54
- 55
- 56
- 57
- 58
- 59
- 60

- 1  
2  
3 18. Anne Kari Knudsen, European Palliative Care Research Centre (PRC), Department of  
4 Oncology, Oslo University Hospital and Institute of Clinical Medicine, University of Oslo,  
5 Oslo, Norway  
6 19. Mats Lambe, Regional Cancer Center Uppsala and Department of Medical Epidemiology  
7 and Biostatistics, Karolinska Institutet, Stockholm, Sweden  
8  
9 20. Rebecca-Jane Law, North Wales Centre for Primary Care Research, Bangor University,  
10 Wrexham, United Kingdom  
11  
12 21. Yulan Lin, European Palliative Care Research Centre (PRC), Department of Oncology,  
13 Oslo University Hospital and Institute of Clinical Medicine, University of Oslo, Oslo,  
14 Norway  
15  
16 22. Martin Malmberg, Department of Oncology, Lund University Hospital, Lund, Sweden  
17  
18 23. Donna Turner, Population Oncology, Cancer Care Manitoba, Winnipeg, Canada  
19  
20 24. Richard D Neal, North Wales Centre for Primary Care Research, Bangor University,  
21 Wrexham, United Kingdom; Academic Unit of Primary Care, University of Leeds, Leeds,  
22 United Kingdom  
23  
24 25. Victoria White, Centre for Behavioral Research in Cancer, Cancer Council Victoria,  
25 Victoria, Australia; School of Psychology Deakin University, Geelong, Victoria, 3217,  
26 Australia  
27  
28 26. David Weller\*, Centre for Population Health Sciences, University of Edinburgh,  
29 Edinburgh, United Kingdom  
30  
31

32 On behalf of the ICBP Module 4 Working Group  
33  
34

35 \* equal contribution  
36  
37  
38  
39

40 Corresponding author:

41 Professor Usha Menon

42 MRC CTU at UCL

43 Institute of Clinical Trials and Methodology

44 90 High Holborn, 2nd Floor, London WC1V 6LJ

45 Email: u.menon@ucl.ac.uk  
46  
47  
48  
49  
50

51 Word count: 3074; Tables: 6 ; Figures: 2 ; Supplementary Files: 6  
52  
53  
54  
55  
56  
57  
58  
59  
60

## Abstract

### Objective

Differences in time intervals to diagnosis and treatment between jurisdictions may contribute to previously reported differences in stage at diagnosis and survival. The International Cancer Benchmarking Partnership Module 4 (ICBP M4) reports the first international comparison of routes to diagnosis and time intervals from symptom onset until treatment start for lung cancer patients.

### Design

Patients, their primary care physicians (PCP) and cancer treatment specialists (CTS) were surveyed in Victoria (Australia), Manitoba and Ontario (Canada), Northern Ireland, England, Scotland and Wales (UK), Denmark, Norway and Sweden. Using Wales as the reference jurisdiction, the 50<sup>th</sup>, 75<sup>th</sup> and 90<sup>th</sup> percentiles for intervals were compared using quantile regression adjusted for age, gender and comorbidity.

### Participants

Consecutive newly diagnosed lung cancer patients, aged >40 years, identified through cancer registries. Of 10,203 eligible patients contacted, 2,631 (25.8%) responded and 2,143 were included in the analysis.

### Primary and secondary outcome measures:

Interval lengths (days, primary), routes to diagnosis, symptoms (secondary).

### Results

With the exception of Denmark, in all other jurisdictions the median total interval from symptom onset to treatment, for respondents diagnosed in 2012-15, was similar to that of Wales. Overall 55% (range 35-75%) were diagnosed following presentation to the PCP. Jurisdiction specific significant differences in patient, diagnostic and treatment intervals, especially for the 10% of patients who waited the longest, were observed. Based on overall trends, jurisdictions could be grouped into those with trends of reduced, longer and similar intervals to Wales. All symptoms other than persistent cough were less frequently reported by the PCP when compared to patients.

### Conclusion

1  
2  
3 There are differences between jurisdictions in interval lengths, especially for patients who  
4 wait the longest. The data will allow jurisdictions to develop more focused lung cancer policy  
5 and clinical initiatives. Future analysis will explore if these differences in intervals impact on  
6 stage or survival.  
7  
8  
9

10 **Key words:**

11 lung cancer, routes to diagnosis, time intervals, international health systems, symptomatic  
12 presentation  
13  
14  
15  
16  
17  
18  
19  
20  
21  
22  
23  
24  
25  
26  
27  
28  
29  
30  
31  
32  
33  
34  
35  
36  
37  
38  
39  
40  
41  
42  
43  
44  
45  
46  
47  
48  
49  
50  
51  
52  
53  
54  
55  
56  
57  
58  
59  
60

For peer review only

### Strengths and limitations of this study

- This is the first international study to use standardised survey methods and definitions to systematically examine key intervals from patients first noticing symptoms or bodily changes until the start of treatment for lung cancer
- Recall bias was minimised by the triangulation of different data sources and by patients completing the questionnaire within a limited time window (median 5 months) after the cancer diagnosis
- A key limitation, as with all questionnaire-based studies was non-response bias which varied across jurisdictions, and analyses were adjusted for age, gender and comorbidity, but not for ethnicity and education as there are different classification systems in participating countries
- Recruitment of patients up to 9 rather than 6 months after diagnosis might have magnified selection bias due to high mortality in lung cancer but a sensitivity analysis suggests that this did not impact on the results.
- In Norway and Victoria, a small sample size and restriction of eligibility to only surgical patients, respectively, means some comparisons are made with caution – this mainly applies to the treatment interval and some patient characteristics.

## Introduction

Lung cancer is the most common cancer worldwide, with nearly 1.83 million cases diagnosed in 2012, and is the leading cause of cancer death globally, accounting for 19% of cancer deaths.[1] Survival is typically low, with 5-year survival in Europe and North America <20%.[2] A key factor is diagnosis at advanced stage. Reasons for this are multi-faceted and include delays due to the atypical nature of some presenting symptoms, poor sensitivity of chest X-rays and primary care physicians not acting quickly enough.[3] Within European countries, differences of 12 and 5 percentage points in 1- and 5-year relative survival, respectively, have been reported for lung cancers diagnosed between 1999-2007.[4] This and other international comparisons raises the possibility of additional contributory factors such as variations in referral patterns, access to diagnostic tests and delays in treatment.[5]

One way of addressing this is to chart the patient journey from first noticing symptoms to treatment start. While many national studies using different methodologies have reported on time intervals to treatment in lung cancer, as far as we are aware no international comparisons exist.[6-18]

The International Cancer Benchmarking Partnership (ICBP) was established to explore differences in cancer outcomes and their causes in countries with comparable wealth and universal access to healthcare.[19] We report results from Module 4 (ICBP M4) on differences in time intervals and routes to diagnosis in symptomatic lung cancer patients from ten jurisdictions in Australia, Canada, Denmark, Norway, Sweden and the United Kingdom.

## Methods

Methods have been previously detailed.[20] In brief, in each of the ten participating jurisdictions (Victoria (Australia), Manitoba, Ontario (Canada), Denmark, Norway, Sweden Northern Ireland, England, Scotland and Wales), consecutive patients aged  $\geq 40$  years, newly diagnosed with malignant lung or bronchus cancer (ICD-10:C34.0-C34.9; behaviour code ICD-O-3) were identified by the cancer registry using validated methods (hospital episode, cancer registration, pathology). Exclusion criteria included previous lung or synchronous cancers. Patients with a previous non-lung primary cancer were eligible. Target recruitment was 200 symptomatic patients per jurisdiction.

Following a vital status check, cancer registries posted the patient questionnaire (Supplementary File 1) either 1) to the relevant primary care physician (PCP) who then forwarded the pre-addressed envelope (Wales, England, Scotland) or 2) to the patient

1  
2  
3 directly or via the research team (remaining seven jurisdictions). In an attempt to decrease  
4 attrition and recall bias, the protocol initially specified that all patient questionnaires should  
5 be completed within 6 months of diagnosis. As there were administrative delays in cancer  
6 notification, this was extended to 9 months.  
7  
8  
9

10 On receipt of a completed patient questionnaire, in all jurisdictions except Sweden, the  
11 relevant PCP and cancer treatment specialist (CTS) were sent questionnaires  
12 (Supplementary Files 2 and 3). Specialists provided information on diagnosis and start date  
13 of treatment. The latter was collected directly from registry records in Northern Ireland and  
14 clinical databases in Denmark. Manitoba did not provide specialist data. Date of diagnosis  
15 and stage was also collected where possible through cancer registries. Information on the  
16 types of treatment (surgery, chemotherapy, radiotherapy and other) were obtained from the  
17 patient survey.  
18  
19  
20  
21  
22

#### 23 *Data handling*

24 Data were recoded centrally to ensure that the same explicit rules were applied throughout.  
25 Patients in whom age, date of diagnosis or consent were missing were excluded from  
26 analyses. Rules were used to combine data from the different sources in a standardised way  
27 that ensured reproducibility and transparency (Supplementary File 4). The rules employed a  
28 'hierarchy' principle in terms of the order in which different data sources were used, and  
29 included imputation rules based on the available data. The exact rule was guided by the  
30 measure in question – for example, patient interval was collected primarily from the patient  
31 questionnaire whereas primary care time-points from the PCP questionnaire. All the  
32 measures were further validated using algorithms for outliers and implausible measures (e.g.  
33 negative time intervals).  
34  
35  
36  
37  
38  
39  
40

#### 41 *Routes to diagnosis and symptoms prompting physician visit*

42 These were derived from patient and PCP responses. Symptoms were coded by two PCP  
43 authors (DW and PV) into 'lung cancer specific' or 'other' (Supplementary File 5, Table 1).  
44  
45  
46

#### 47 *Time intervals*

48 Time intervals were derived using the checklist for the Aarhus Statement.[21] The following  
49 time-points were used to calculate the corresponding time intervals (Figure 1):  
50  
51

- 52 • first noticing symptoms
- 53 • first presentation to health care
- 54 • first referral to secondary care
- 55
- 56
- 57
- 58
- 59
- 60

- diagnosis date
- start of curative or palliative treatment

---

FIGURE 1

---

All time-points were validated if there were obvious inconsistency and negative intervals were set to 0 days. All intervals were truncated at 365 days. Missing data were imputed based on specific rules to ensure that the direction of a possible misclassification bias was known.

### *Demographics*

Health status was measured using the self-reported general health item from short form 36 health survey (SF36).[22] Comorbidity was defined as one of four patient or PCP-reported diseases (heart or lung disease, stroke or diabetes) and categorised into: 'none', 'medium' (one or two) or 'high' (three or four). Level of educational was categorised as 'low' (vocational school or lower) and 'high' (university). Stage data (tumour, node, metastasis - TNM - classification) was grouped as I, II, III, IV or missing.[23]

### *Statistical analysis*

Patient characteristics across jurisdictions were compared using Kruskal-Wallis test and Pearson's chi-squared test. Quantile regression was used to estimate differences in intervals.[24] The 50<sup>th</sup>, 75<sup>th</sup> and 90<sup>th</sup> percentiles were compared, using Wales as the reference jurisdiction as it had the lowest lung cancer survival in ICBP Module 1 analysis.[5] Counting days, we used the 'qcount' procedure.[25, 26] Parameters were calculated with 1000 jittered samples. For all interval analyses, multivariable models controlled for differences in age, sex and comorbidity between jurisdictions. Significance level was set to  $\leq 0.05$  with 95% confidence intervals (95%CI) calculated where appropriate. Statistical analyses were carried out using STATA v14.

### *Sensitivity and validity analyses*

All analyses were repeated using only (1) those who fulfilled the 6-month cut-off criteria for interval from diagnosis to questionnaire completion and (2) patient data. The effect of excluding patients for whom at least one interval was missing was investigated. Agreement between the different data sources (registry, patient, PCP (except in Sweden) and CTS (except in Sweden and Manitoba) was measured by Lin's concordance correlation coefficient (CCC).[27]

### *Patient involvement*

The research questions for this survey drew on an extensive literature relating to diagnosis and treatment delays leading to negative patient experiences. While patient experience was not a primary outcome measure for this study, patients were given the opportunity to comment on their experience through questionnaire free-text response options (under separate analysis). Patients were involved in the piloting of study instruments to ascertain if recruitment and questionnaire content and dissemination strategies were appropriate, described elsewhere.[20] Each jurisdiction has committed to communicating the findings and local implications of this study to organisations representing their study participants.

For peer review only

## Results

Of 14,583 lung cancer patients, diagnosed between October 2012 and March 2015 who were alive when identified, 70% (10,203/14,583) were contacted (Table 1). 2,631 (25.8% of contacted, 18% of eligible) completed the patient questionnaire at a median of 5 months (range: 0.1,9) after diagnosis (Table 2). The response rate of contacted patients varied from 11.1% (146/1318) in Norway to 61.8% (333/539) in Denmark. Responding patients were more likely to be aged 60-79 years with less advanced stage (Table 1) and alive one year post diagnosis (data not shown). Of the 2,631 responses, 2,143 (81.5%) were included in the analyses which equates to 14.7% (2,143/14,583) of eligible patients. The key reason respondents were excluded were local oversampling (43.9%; 214/488) for additional analyses (Table 1). In Victoria, the registry was only able to contact patients who had undergone surgery while the sample size in Norway was limited (n=88) due to delays in securing appropriate approvals.

**Table 1:** Cohort for all ten jurisdictions and overall

| Jurisdiction                                                              | Patients approached via PCP |               |              |               |              |               | Patient approached directly by registries/research teams |               |                        |               |                        |               |              |               |                        |               | Total        |               |            |               |               |              |               |                           |        |
|---------------------------------------------------------------------------|-----------------------------|---------------|--------------|---------------|--------------|---------------|----------------------------------------------------------|---------------|------------------------|---------------|------------------------|---------------|--------------|---------------|------------------------|---------------|--------------|---------------|------------|---------------|---------------|--------------|---------------|---------------------------|--------|
|                                                                           | Wales                       |               | England      |               | Scotland     |               | N Ireland                                                |               | Denmark                |               | Manitoba               |               | Ontario      |               | Sweden                 |               |              |               | Norway     |               | Victoria      |              |               |                           |        |
|                                                                           | n                           | (%)           | n            | (%)           | n            | (%)           | n                                                        | (%)           | n                      | (%)           | n                      | (%)           | n            | (%)           | n                      | (%)           |              |               | n          | (%)           | n             | (%)          |               |                           |        |
| <b>Eligible patients<sup>a, b</sup></b>                                   | <b>1,811</b>                | <b>(100)</b>  | <b>2,517</b> | <b>(100)</b>  | <b>1,366</b> | <b>(100)</b>  | <b>620</b>                                               | <b>(100)</b>  | <b>539</b>             | <b>(100)</b>  | <b>980</b>             | <b>(100)</b>  | <b>4,080</b> | <b>(100)</b>  | <b>493</b>             | <b>(100)</b>  | <b>1,318</b> | <b>(100)</b>  | <b>859</b> | <b>(100)</b>  | <b>14,583</b> | <b>(100)</b> |               |                           |        |
| <b>Packs sent to PCP<sup>c, d</sup></b>                                   | <b>1,811</b>                | <b>(99.7)</b> | <b>1,759</b> | <b>(69.9)</b> | <b>1,137</b> | <b>(83.2)</b> |                                                          |               |                        |               |                        |               |              |               |                        |               |              |               |            |               |               | <b>4,707</b> | <b>(82.7)</b> |                           |        |
| pack not forwarded by PCP                                                 | 547                         | (30.1)        | 255          | (14.5)        | 201          | (17.7)        |                                                          |               |                        |               |                        |               |              |               |                        |               |              |               |            |               |               |              | 1,003         | (21.3)                    |        |
| unsure if pack forwarded by PCP                                           | 531                         | (29.2)        | 559          | (31.8)        | 234          | (20.6)        |                                                          |               |                        |               |                        |               |              |               |                        |               |              |               |            |               |               |              |               | 1,324                     | (28.1) |
| <b>Patients contacted by PCP<sup>c, d</sup></b>                           | <b>733</b>                  | <b>(40.4)</b> | <b>945</b>   | <b>(53.7)</b> | <b>702</b>   | <b>(61.7)</b> |                                                          |               |                        |               |                        |               |              |               |                        |               |              |               |            |               |               |              | <b>2,380</b>  | <b>(50.6)</b>             |        |
| <b>Patients approached directly<sup>c</sup></b>                           |                             |               |              |               |              |               | <b>614</b>                                               | <b>(99.0)</b> | <b>539</b>             | <b>(100)</b>  | <b>745</b>             | <b>(76.0)</b> | <b>3,687</b> | <b>(90.4)</b> | <b>493</b>             | <b>(100)</b>  | <b>1,200</b> | <b>(91)</b>   | <b>545</b> | <b>(63.4)</b> |               |              | <b>7,823</b>  | <b>(88)</b>               |        |
| patient died                                                              |                             |               |              |               |              |               | 6                                                        | (1.0)         | 0                      | (0.0)         | 103                    | (13.8)        | 249          | (6.8)         | 0                      | (0.0)         | 0            | (0.0)         | 0          | (0.0)         |               |              | 358           | (4.6)                     |        |
| no address                                                                |                             |               |              |               |              |               | 0                                                        | (0.0)         | 0                      | (0.0)         | 9                      | (1.2)         | 255          | (6.9)         | 0                      | (0.0)         | 0            | (0.0)         | 0          | (0.0)         |               |              | 264           | (3.4)                     |        |
| Other                                                                     |                             |               |              |               |              |               | 0                                                        | (0.0)         | 0                      | (0.0)         | 6                      | (0.8)         | 215          | (5.8)         | 0                      | (0.0)         | 0            | (0.0)         | 0          | (0.0)         |               |              | 221           | (2.8)                     |        |
| <b>Patient responses (% of eligible patients)<sup>c</sup></b>             | <b>223</b>                  | <b>(12.3)</b> | <b>261</b>   | <b>(10.4)</b> | <b>235</b>   | <b>(17.2)</b> | <b>226</b>                                               | <b>(36.5)</b> | <b>333</b>             | <b>(61.8)</b> | <b>205</b>             | <b>(20.9)</b> | <b>572</b>   | <b>(14.0)</b> | <b>217</b>             | <b>(44)</b>   | <b>146</b>   | <b>(11.1)</b> | <b>213</b> | <b>(24.8)</b> |               |              | <b>2,631</b>  | <b>(18)</b>               |        |
| <b>Patient responses (% of contacted)<sup>e</sup></b>                     | <b>223</b>                  | <b>(30.4)</b> | <b>261</b>   | <b>(27.6)</b> | <b>235</b>   | <b>(33.5)</b> | <b>226</b>                                               | <b>(37.2)</b> | <b>333</b>             | <b>(61.8)</b> | <b>205</b>             | <b>(32.7)</b> | <b>572</b>   | <b>(19.3)</b> | <b>217</b>             | <b>(44)</b>   | <b>146</b>   | <b>(12.2)</b> | <b>213</b> | <b>(39.1)</b> |               |              | <b>2,631</b>  | <b>(27.5)</b>             |        |
| extra sample for local purpose                                            | 0                           | (0.0)         | 0            | (0.0)         | 0            | (0.0)         | 0                                                        | (0.0)         | 0                      | (0.0)         | 0                      | (0.0)         | 214          | (37.4)        | 0                      | (0.0)         | 0            | (0.0)         | 0          | (0.0)         |               |              | 214           | (8.1)                     |        |
| other                                                                     | 0                           | (0.0)         | 0            | (0.0)         | 35           | (14.9)        | 25                                                       | (11.1)        | 38                     | (11.4)        | 0                      | (0.0)         | 43           | (7.5)         | 0                      | (0.0)         | 0            | (0.0)         | 3          | (1.4)         |               |              | 144           | (5.5)                     |        |
| <b>Patient surveys submitted for analyses<sup>f</sup></b>                 | <b>223</b>                  | <b>(100)</b>  | <b>261</b>   | <b>(100)</b>  | <b>200</b>   | <b>(85.1)</b> | <b>201</b>                                               | <b>(88.9)</b> | <b>295</b>             | <b>(88.6)</b> | <b>205</b>             | <b>(100)</b>  | <b>315</b>   | <b>(55.1)</b> | <b>217</b>             | <b>(100)</b>  | <b>146</b>   | <b>(100)</b>  | <b>210</b> | <b>(98.6)</b> |               |              | <b>2,273</b>  | <b>(86.4)</b>             |        |
| excluded for analyses – total                                             | 12                          | (5.4)         | 9            | (3.4)         | 2            | (1.0)         | 1                                                        | (0.5)         | 10                     | (3.4)         | 3                      | (1.5)         | 27           | (8.6)         | 6                      | (2.8)         | 58           | (39.7)        | 2          | (1.0)         |               |              | 130           | (5.7)                     |        |
| - previous cancer                                                         | 0                           | (0.0)         | 5            | (1.9)         | 0            | (0.0)         | 0                                                        | (0.0)         | 0                      | (0.0)         | 0                      | (0.0)         | 3            | (1.0)         | 0                      | (0.0)         | 0            | (0.0)         | 0          | (0.0)         |               |              | 8             | (0.4)                     |        |
| - unknown date of consent or diagnosis                                    | 0                           | (0.0)         | 0            | (0.0)         | 0            | (0.0)         | 0                                                        | (0.0)         | 5                      | (1.7)         | 0                      | (0.0)         | 1            | (0.3)         | 6                      | (2.8)         | 4            | (2.7)         | 0          | (0.0)         |               |              | 16            | (0.7)                     |        |
| - consent too late/too early                                              | 12                          | (5.4)         | 4            | (1.5)         | 2            | (1.0)         | 1                                                        | (0.5)         | 5                      | (1.7)         | 3                      | (1.5)         | 22           | (7.0)         | 0                      | (0.0)         | 33           | (22.6)        | 2          | (1.0)         |               |              | 84            | (3.7)                     |        |
| - other                                                                   | 0                           | (0.0)         | 0            | (0.0)         | 0            | (0.0)         | 0                                                        | (0.0)         | 0                      | (0.0)         | 0                      | (0.0)         | 1            | (0.3)         | 0                      | (0.0)         | 21           | (14.4)        | 0          | (0.0)         |               |              | 22            | (1.0)                     |        |
| <b>Patients included in analyses<sup>i</sup> (% of forwarded surveys)</b> | <b>211</b>                  | <b>(94.6)</b> | <b>252</b>   | <b>(96.6)</b> | <b>198</b>   | <b>(99.0)</b> | <b>200</b>                                               | <b>(99.5)</b> | <b>285</b>             | <b>(96.6)</b> | <b>202</b>             | <b>(98.5)</b> | <b>288</b>   | <b>(91.4)</b> | <b>211</b>             | <b>(97.2)</b> | <b>88</b>    | <b>(60.3)</b> | <b>208</b> | <b>(99.0)</b> |               |              | <b>2,143</b>  | <b>(94.3)<sup>h</sup></b> |        |
| <b>PCP surveys<sup>j</sup> (% of analysed patients)</b>                   | <b>133</b>                  | <b>(63.0)</b> | <b>196</b>   | <b>(77.8)</b> | <b>149</b>   | <b>(75.3)</b> | <b>181</b>                                               | <b>(90.5)</b> | <b>218</b>             | <b>(76.5)</b> | <b>109</b>             | <b>(54.0)</b> | <b>93</b>    | <b>(32.5)</b> | <b>n/a<sup>h</sup></b> |               | <b>27</b>    | <b>(30.7)</b> | <b>105</b> | <b>(50.5)</b> |               |              | <b>1,211</b>  | <b>(56.6)<sup>i</sup></b> |        |
| <b>Specialist surveys<sup>k</sup> (% of analysed patients)</b>            | <b>98</b>                   | <b>(46.4)</b> | <b>153</b>   | <b>(60.7)</b> | <b>106</b>   | <b>(53.5)</b> | <b>n/a<sup>g</sup></b>                                   |               | <b>149<sup>g</sup></b> | <b>(52.3)</b> | <b>n/a<sup>h</sup></b> |               | <b>62</b>    | <b>(21.7)</b> | <b>n/a<sup>h</sup></b> |               | <b>20</b>    | <b>(22.7)</b> | <b>55</b>  | <b>(26.4)</b> |               |              | <b>643</b>    | <b>(37.0)<sup>m</sup></b> |        |

<sup>a</sup>Eligible as per protocol: individual aged 40 years or more, with cancer of the lung or bronchus (ICD-10 code: C34.0-C34.9; behaviour code ICD-O 3) but no synchronous primary cancer or prior history of lung cancer, alive at identification who completed consent to participate within nine months of diagnosis. <sup>b</sup>In some jurisdictions some 'eligible' patients had pre-opted out from being contacted and a small number where PCP information was not available. <sup>c</sup>Percentages of eligible patients. <sup>d</sup>Maximum of potentially contacted patients. i.e. sum of packs forwarded by PCP and packs unsure if forwarded by PCP.

<sup>e</sup>Percentages of patients contacted by PCP (see note d) for Wales, England and Scotland or percentages of patients contacted directly by a registry excl. non-accessible patients (all other jurisdictions). <sup>f</sup>Percentages of patient responses. <sup>g</sup>Data obtained from registries instead in N Ireland and Denmark. <sup>h</sup>Data not collected in this jurisdiction. <sup>i</sup>Denominator = total number of forwarded cases excl. patients not included in analytic sample in Ontario. <sup>j</sup>Denominator = total number of analysed cases excl. patients from Sweden. <sup>k</sup>Denominator = total number of analysed cases excl. patients from Sweden. Manitoba & N Ireland.

### *Baseline characteristics*

The characteristics are detailed in Table 2. The cohort was predominantly White (95%), median age 70 years (IQR 64,75) with 82% reporting 'low' levels of education. Norway provided stage data classified as local, regional and distant which could not be converted to TNM stage data.

Ontario was the only jurisdiction with more female (65%) than male respondents. While self-reported health differed significantly, with Welsh patients (9%) reporting twice as high 'poor health' rates than English or Swedish (4%) and eight-fold that of Manitoba (2%), there was no difference in self-reported comorbidity rates. Even after the exclusion of Victoria, there was significant variation in early Stage (I/II) disease which ranged from 25% (Wales) to 59% (Ontario) and surgical resection rates which varied from 27% (Wales) to 58% (Ontario) (Table 2).

**Table 2.** The characteristics of eligible patients by jurisdictions and overall

|                                                                                              | Wales<br>(N=211) | England<br>(N=252) | Scotland<br>(N=198) | N Ireland<br>(N=200) | Denmark<br>(N=285) | Manitoba<br>(N=202) | Ontario<br>(N=288) | Sweden<br>(N=211) | Norway<br>(N=88) | Victoria<br>(N=208) | Overall<br>(N=2143) | p-value <sup>6</sup>                          |
|----------------------------------------------------------------------------------------------|------------------|--------------------|---------------------|----------------------|--------------------|---------------------|--------------------|-------------------|------------------|---------------------|---------------------|-----------------------------------------------|
| Date of diagnosis of first patient                                                           | 03/04/2013       | 28/01/2013         | 26/04/2013          | 22/01/2013           | 16/05/2013         | 10/10/2012          | 08/10/2013         | 01/10/2013        | 16/01/2014       | 08/01/2013          | 10/10/2012          |                                               |
| Date of diagnosis of last patient                                                            | 25/09/2014       | 14/08/2013         | 04/12/2013          | 02/12/2014           | 13/11/2013         | 27/03/2015          | 01/10/2014         | 30/05/2014        | 21/01/2015       | 28/12/2014          | 27/03/2015          |                                               |
| Interval from diagnosis date of first patient to last patient in months (recruitment period) | 18               | 7                  | 7                   | 23                   | 6                  | 30                  | 12                 | 8                 | 12               | 24                  | 30                  |                                               |
| Median (range) interval diagnosis to questionnaire completion in months                      | 5 (0.6,9)        | 5 (3,9)            | 5 (1,9)             | 4 (0.1,9)            | 5 (2,8)            | 6 (4,9)             | 6 (4,9)            | 4 (3,8)           | 7 (5,9)          | 5 (0.2,8)           | 5 (0.1,9)           |                                               |
| <b>Age years</b>                                                                             |                  |                    |                     |                      |                    |                     |                    |                   |                  |                     |                     |                                               |
| Median (IQR)                                                                                 | 71 (65, 77)      | 71 (65, 77)        | 70 (64, 76)         | 69 (62, 75)          | 70 (63, 74)        | 70 (63, 77)         | 70 (64, 75)        | 70 (63, 75)       | 69 (64, 73)      | 68 (63, 73)         | 70 (64, 75)         | 0.010 <sup>1</sup>                            |
| <b>Sex n(%)</b>                                                                              |                  |                    |                     |                      |                    |                     |                    |                   |                  |                     |                     |                                               |
| Male                                                                                         | 127(60)          | 134(53)            | 100(51)             | 105(53)              | 151(53)            | 100(50)             | 131(45)            | 111(53)           | 46(52)           | 112(54)             | 1117(52)            | 0.159 <sup>2</sup>                            |
| <b>Health State n(%)</b>                                                                     |                  |                    |                     |                      |                    |                     |                    |                   |                  |                     |                     |                                               |
| Good                                                                                         | 135(64)          | 176(70)            | 131(66)             | 126(63)              | 190(67)            | 156(77)             | 220(76)            | 152(72)           | 50(57)           | 163(78)             | 1499(70)            | <0.001* <sup>1</sup><br><0.001** <sup>2</sup> |
| Fair                                                                                         | 55(26)           | 59(23)             | 52(26)              | 51(26)               | 62(22)             | 41(20)              | 47(16)             | 49(23)            | 32(36)           | 33(16)              | 481(22)             |                                               |
| Poor                                                                                         | 20(9)            | 11(4)              | 14(7)               | 16(8)                | 18(6)              | 4(2)                | 16(6)              | 9(4)              | 6(7)             | 10(5)               | 124(6)              |                                               |
| Missing                                                                                      | 1(0.5)           | 6(2)               | 1(0.5)              | 7(4)                 | 15(5)              | 1(0.5)              | 5(2)               | 1(0.5)            | 0(0)             | 2(1)                | 39(2)               |                                               |
| <b>Comorbidity<sup>3</sup> n(%)</b>                                                          |                  |                    |                     |                      |                    |                     |                    |                   |                  |                     |                     |                                               |
| No                                                                                           | 92(44)           | 113(45)            | 98(49)              | 82(41)               | 111(39)            | 101(50)             | 136(47)            | 114(54)           | 35(40)           | 98(47)              | 980(46)             | 0.029* <sup>1</sup><br>0.032** <sup>2</sup>   |
| Medium                                                                                       | 111(53)          | 129(51)            | 92(46)              | 103(52)              | 157(55)            | 93(46)              | 132(46)            | 87(41)            | 48(55)           | 100(48)             | 1052(49)            |                                               |
| High                                                                                         | 7(3)             | 9(4)               | 8(4)                | 15(8)                | 11(4)              | 6(3)                | 18(6)              | 6(3)              | 5(6)             | 8(4)                | 93(4)               |                                               |
| Missing                                                                                      | 1(0.5)           | 1(0.4)             | 0(0)                | 0(0)                 | 6(2)               | 2(1)                | 2(0.7)             | 4(2)              | 0(0)             | 2(1)                | 18(0.8)             |                                               |
| <b>Education n(%)</b>                                                                        |                  |                    |                     |                      |                    |                     |                    |                   |                  |                     |                     |                                               |
| Low                                                                                          | 172(82)          | 217(86)            | 174(88)             | 166(83)              | 232(81)            | 170(84)             | 224(78)            | 159(75)           | 65(74)           | 181(87)             | 1760(82)            | <0.001* <sup>1</sup><br><0.001** <sup>2</sup> |
| High                                                                                         | 11(5)            | 15(6)              | 11(6)               | 17(9)                | 15(5)              | 21(10)              | 55(19)             | 48(23)            | 14(16)           | 24(12)              | 231(11)             |                                               |
| Missing                                                                                      | 28(13)           | 20(8)              | 13(7)               | 17(9)                | 38(13)             | 11(5)               | 9(3)               | 4(2)              | 9(10)            | 3(1)                | 152(7)              |                                               |
| <b>Ethnicity n(%)</b>                                                                        |                  |                    |                     |                      |                    |                     |                    |                   |                  |                     |                     |                                               |
|                                                                                              | 205(97)          | 249(99)            | 197(99)             | 196(98)              | 267(94)            | 173(86)             | 261(91)            | n/a               | 87(99)           | 199(96)             | 1834(95)            |                                               |

|                                            | Wales<br>(N=211) | England<br>(N=252) | Scotland<br>(N=198) | N Ireland<br>(N=200) | Denmark<br>(N=285) | Manitoba<br>(N=202) | Ontario<br>(N=288) | Sweden<br>(N=211) | Norway<br>(N=88)    | Victoria<br>(N=208) | Overall<br>(N=2143) | p-value <sup>6</sup> |
|--------------------------------------------|------------------|--------------------|---------------------|----------------------|--------------------|---------------------|--------------------|-------------------|---------------------|---------------------|---------------------|----------------------|
| White                                      |                  |                    |                     |                      |                    |                     |                    |                   |                     |                     |                     | <0.001**2            |
| Asian                                      | 1(0.5)           | 0(0)               | 1(0.5)              | 0(0)                 | 0(0)               | 12(6)               | 21(7)              | n/a               | 1(1)                | 6(3)                | 41(2)               | <0.001**2            |
| Black                                      | 0(0)             | 1(0.4)             | 0(0)                | 0(0)                 | 1(0.4)             | 0(0)                | 1(0.3)             | n/a               | 0(0)                | 0(0)                | 3(0.2)              |                      |
| Other                                      | 0(0)             | 0(0)               | 0(0)                | 0(0)                 | 0(0)               | 15(7)               | 2(0.7)             | n/a               | 0(0)                | 0(0)                | 17(0.9)             |                      |
| Missing                                    | 5(2)             | 2(0.8)             | 0(0)                | 4(2)                 | 17(6)              | 2(1)                | 3(1)               | n/a               | 0(0)                | 3(1)                | 36(2)               |                      |
| <b>Smoking n(%)</b>                        |                  |                    |                     |                      |                    |                     |                    |                   |                     |                     |                     |                      |
| Never                                      | 13(6)            | 18(7)              | 12(6)               | 19(10)               | 15(5)              | 22(11)              | 31(11)             | 41(19)            | 11(13)              | 33(16)              | 215(10)             | <0.001*2             |
| Currently                                  | 19(9)            | 288(11)            | 26(13)              | 41(21)               | 58(20)             | 24(12)              | 29(10)             | 29(14)            | 11(13)              | 9(4)                | 274(13)             | <0.001**2            |
| In the past                                | 174(82)          | 204(81)            | 160(81)             | 137(69)              | 205(72)            | 156(77)             | 225(78)            | 139(66)           | 66(75)              | 165(79)             | 1631(76)            |                      |
| Missing                                    | 5(2)             | 2(0.8)             | 0(0)                | 3(2)                 | 7(2)               | 0(0)                | 3(1)               | 2(0.9)            | 0(0)                | 1(0.5)              | 23(1)               |                      |
| <b>Tumour stage - TNM n(%)</b>             |                  |                    |                     |                      |                    |                     |                    |                   |                     |                     |                     |                      |
| I                                          | 26(12)           | 68(27)             | 49(25)              | 42(21)               | 74(26)             | 83(41)              | 133(46)            | 59(28)            | 3(3)                | 124(60)             | 661(31)             | <0.001*2             |
| II                                         | 27(13)           | 36(14)             | 32(16)              | 33(17)               | 26(9)              | 19(9)               | 38(13)             | 11(5)             | 5(6)                | 47(23)              | 274(13)             | <0.001**2            |
| III                                        | 64(30)           | 57(23)             | 56(28)              | 59(30)               | 84(29)             | 48(24)              | 54(19)             | 40(19)            | 5(6)                | 19(9)               | 486(23)             |                      |
| IV                                         | 62(29)           | 80(32)             | 50(25)              | 62(31)               | 94(33)             | 48(24)              | 54(19)             | 94(45)            | 3(3)                | 13(6)               | 560(26)             |                      |
| Missing                                    | 32(15)           | 11(4)              | 11(6)               | 4(2)                 | 7(2)               | 4(2)                | 9(3)               | 7(3)              | 72(82) <sup>4</sup> | 5(2)                | 162(8)              |                      |
| <b>Tumour stage - TNM<sup>5</sup> n(%)</b> |                  |                    |                     |                      |                    |                     |                    |                   |                     |                     |                     |                      |
| I/II                                       | 53(25)           | 104(41)            | 81(41)              | 75(38)               | 100(35)            | 102(51)             | 171(59)            | 70(33)            | 8(9)                | 171(82)             | 764(39)             | <0.001*2,5           |
| III/IV                                     | 126(60)          | 137(54)            | 106(54)             | 121(61)              | 178(62)            | 96(48)              | 108(38)            | 134(64)           | 8(9)                | 32(15)              | 1014(52)            | <0.001**2,5          |
| Missing                                    | 32(15)           | 11(4)              | 11(6)               | 4(2)                 | 7(2)               | 4(2)                | 9(3)               | 7(3)              | 72(82)              | 5(2)                | 157(8)              |                      |
| <b>Treatment Surgery n(%)</b>              |                  |                    |                     |                      |                    |                     |                    |                   |                     |                     |                     |                      |
| Yes                                        | 57(27)           | 107(42)            | 84(42)              | 65(33)               | 81(28)             | 113(56)             | 168(58)            | 65(31)            | 36(41)              | 199(96)             | 975(45)             | <0.001*2,5           |
| No                                         | 61(29)           | 56(22)             | 55(28)              | 94(47)               | 90(32)             | 44(22)              | 111(39)            | 79(37)            | 28(32)              | 5(2)                | 623(29)             | <0.001**2,5          |
| Missing                                    | 93(44)           | 89(35)             | 59(30)              | 41(21)               | 114(40)            | 45(22)              | 9(3)               | 67(32)            | 24(27)              | 4(2)                | 545(25)             |                      |
| <b>Treatment Chemo n(%)</b>                |                  |                    |                     |                      |                    |                     |                    |                   |                     |                     |                     |                      |
| Yes                                        | 105(50)          | 125(50)            | 98(49)              | 93(47)               | 159(56)            | 93(46)              | 107(37)            | 133(63)           | 50(57)              | 63(30)              | 1026(48)            | <0.001*2,5           |
| No                                         | 41(19)           | 51(20)             | 46(23)              | 65(33)               | 45(16)             | 62(31)              | 172(60)            | 37(18)            | 18(20)              | 137(66)             | 674(32)             | <0.001**2,5          |
| Missing                                    | 65(31)           | 76(30)             | 54(27)              | 42(21)               | 81(28)             | 47(23)              | 9(3)               | 41(19)            | 20(23)              | 8(4)                | 443(21)             |                      |
| <b>Treatment Radio n(%)</b>                |                  |                    |                     |                      |                    |                     |                    |                   |                     |                     |                     |                      |
| Yes                                        | 82(39)           | 68(27)             | 76(38)              | 72(36)               | 114(40)            | 81(40)              | 98(34)             | 70(33)            | 41(47)              | 29(14)              | 731(34)             | <0.001*2,5           |
| No                                         | 50(24)           | 72(29)             | 50(25)              | 77(39)               | 69(24)             | 71(35)              | 180(63)            | 69(33)            | 22(25)              | 155(75)             | 815(38)             | <0.001**2,5          |
| Missing                                    | 79(37)           | 112(44)            | 72(36)              | 51(26)               | 102(36)            | 50(25)              | 10(3)              | 72(34)            | 25(28)              | 24(12)              | 597(28)             |                      |
| <b>Treatment Other n(%)</b>                |                  |                    |                     |                      |                    |                     |                    |                   |                     |                     |                     |                      |
| Yes                                        | 10(5)            | 14(6)              | 14(7)               | 11(6)                | 30(11)             | 18(9)               | 9(3)               | 0(0)              | 7(8)                | 16(8)               | 129(6)              | <0.001*2,5           |
| No                                         | 48(23)           | 63(25)             | 45(23)              | 69(35)               | 255(89)            | 3(1)                | 261(91)            | 0(0)              | 2(2)                | 138(66)             | 884(41)             | <0.001**2,5          |
| Missing                                    | 153(72)          | 175(69)            | 139(70)             | 120(60)              | 0(0)               | 181(90)             | 18(6)              | 211(100)          | 79(90)              | 54(26)              | 1130(53)            |                      |

1  
2  
3  
4  
5  
6  
7  
8  
9  
10  
11  
12  
13  
14  
15  
16  
17  
18  
19  
20  
21  
22  
23  
24  
25  
26  
27  
28  
29  
30  
31  
32  
33  
34  
35  
36  
37  
38  
39  
40  
41  
42  
43  
44  
45  
46  
47

<sup>1</sup>Differences between jurisdictions were tested by the Kruskal-Wallis test, <sup>2</sup>Differences between jurisdictions were tested by the Pearson's Chi<sup>2</sup> test, <sup>3</sup>Comorbidity coded as none=no reported, medium=1-2 reported and high=3+ reported, <sup>4</sup>This included cases which could not be mapped as they were classified as per Cancer Registry of Norway into local (stage I), regional (stage II-III) and distant (stage IV) <sup>5</sup>Excluding Victoria, <sup>6</sup>Excluding Norway, \*Missing category is excluded, \*\*Missing category is included, Abbreviations: IQR=inter-quartile range.

For peer review only

1  
2  
3  
4 *Routes to diagnosis*

5 Results are detailed in Table 3. Over half (55%) were diagnosed following presentation to  
6 the PCP of whom 63% (range: 29% Norway - 82% Wales; data not shown) were urgently  
7 referred with a suspicion of cancer, based on the PCP questionnaire.  
8  
9  
10  
11  
12  
13  
14  
15  
16  
17  
18  
19  
20  
21  
22  
23  
24  
25  
26  
27  
28  
29  
30  
31  
32  
33  
34  
35  
36  
37  
38  
39  
40  
41  
42  
43  
44  
45  
46  
47  
48  
49  
50  
51  
52  
53  
54  
55  
56  
57  
58  
59  
60

For peer review only

**Table 3.** Routes to diagnosis of lung cancer patients for each jurisdiction. All figures are n(%) unless otherwise stated.

|                                                                                            | Wales<br>(N=211) | England<br>(N=252) | Scotland<br>(N=198) | N Ireland<br>(N=200) | Denmark<br>(N=285) | Manitoba<br>(N=202) | Ontario<br>(N=288) | Sweden<br>(N=211) | Norway<br>(N=88) | Victoria<br>(N=208) | Total<br>(N=2143) |
|--------------------------------------------------------------------------------------------|------------------|--------------------|---------------------|----------------------|--------------------|---------------------|--------------------|-------------------|------------------|---------------------|-------------------|
| Symptoms prompting visit to PCP                                                            | 109(52)          | 150(60)            | 128(65)             | 131(66)              | 170(60)            | 101(50)             | 91(32)             | 65(31)            | 35(40)           | 106(51)             | 1086(51)          |
| Symptoms prompting emergency (A&E) department visit <sup>1</sup>                           | 11(5)            | 18(7)              | 12(6)               | 22(11)               | 21(7)              | 25(12)              | 39(14)             | 18(9)             | 3(3)             | 6(3)                | 175(8)            |
| Symptoms prompting visit to PCP and emergency (A&E) department <sup>1</sup>                | 10(5)            | 4(2)               | 7(4)                | 18(9)                | 8(3)               | 15(7)               | 12(4)              | 8(4)              | 5(6)             | 3(1)                | 90(4)             |
| Incidental diagnosis in course of investigation/treatment for another problem <sup>2</sup> | 68(32)           | 37(15)             | 36(18)              | 19(10)               | 55(19)             | 57(28)              | 116(40)            | 107(51)           | 32(36)           | 90(43)              | 617(29)           |
| Unknown routes to diagnosis <sup>3</sup>                                                   | 10(5)            | 17(7)              | 11(6)               | 5(3)                 | 16(6)              | 4(2)                | 14(5)              | 11(5)             | 8(9)             | 0(0)                | 96(5)             |
| Other <sup>4</sup>                                                                         | 3(1)             | 25(10)             | 3(2)                | 4(2)                 | 14(5)              | 0(0)                | 16(6)              | 2(1)              | 5(6)             | 3(1)                | 75(3)             |
| Missing                                                                                    | 0(0)             | 1(0.4)             | 1(0.5)              | 1(0.5)               | 1(0.4)             | 0(0)                | 0(0)               | 0(0)              | 0(0)             | 0(0)                | 4(0.2)            |

<sup>1</sup> Emergency (A&E) route was ascribed when the patient reported pathway to cancer diagnosis involving going or being taken to the emergency department or the PCP reported that the patient presented to emergency department with or without their involvement <sup>2</sup> this could be by PCP, another doctor or via hospital; <sup>3</sup> includes cases where PCP or patient reported routes to diagnosis as 'Other' or 'Missing' but also reported symptoms or duration of symptoms, or date of first symptom, or waiting time for PCP appointment; <sup>4</sup> includes cases where PCP or patient reported routes to diagnosis as 'Other' and hasn't reported any symptoms or duration of symptoms, or date of first symptom, or waiting time for PCP appointment.

1  
2  
3  
4 *Symptoms prompting visit to physician*

5 The median number of patient-reported symptoms were 2 (IQR 1,3). Across jurisdictions, the  
6 most common patient-reported symptoms were persistent cough (39%), breathlessness  
7 (37%) and fatigue (27%) although there was significant variation in proportion of patients  
8 presenting with individual symptoms (Table 4).  
9  
10

11  
12  
13 The PCPs reported a median of 1 (IQR 1,2) symptom at first presentation, with the most  
14 common being persistent cough (39%). Across jurisdictions, the reporting of other symptoms  
15 by the PCP was significantly lower compared to patients, especially fatigue (4%) and weight  
16 loss (8%). Unlike patients, there was minimal variation in PCP reporting of symptoms, with  
17 significant differences limited to 'no symptoms', 'other symptoms not previously listed' and  
18 weight loss. Overall 64% of symptoms were labelled as 'cancer specific' by the study PCPs  
19 (Table 4).  
20  
21  
22  
23  
24  
25  
26  
27  
28  
29  
30  
31  
32  
33  
34  
35  
36  
37  
38  
39  
40  
41  
42  
43  
44  
45  
46  
47  
48  
49  
50  
51  
52  
53  
54  
55  
56  
57  
58  
59  
60

**Table 4.** Symptoms experienced by patients and presenting symptoms noted by PCP for eligible patients. All figures are n(%)

|                                              | Wales   | England | Scotland | N Ireland | Denmark | Manitoba | Ontario | Sweden  | Norway | Victoria | Overall  | p <sup>†</sup> |
|----------------------------------------------|---------|---------|----------|-----------|---------|----------|---------|---------|--------|----------|----------|----------------|
| <b>Symptoms (reported by patient)</b>        | (N=211) | (N=252) | (N=198)  | (N=200)   | (N=285) | (N=202)  | (N=288) | (N=211) | (N=88) | (N=208)  | (N=2143) |                |
| persistent cough                             | 113(54) | 123(49) | 97(49)   | 83(42)    | 97(34)  | 71(35)   | 125(43) | 84(40)  | 10(11) | 39(19)   | 842(39)  | <0.001         |
| breathlessness                               | 109(52) | 126(50) | 82(41)   | 73(37)    | 99(35)  | 63(31)   | 119(41) | 77(36)  | 12(14) | 24(12)   | 784(37)  | <0.001         |
| fatigue                                      | 75(36)  | 79(31)  | 64(32)   | 61(31)    | 38(13)  | 55(27)   | 92(32)  | 60(28)  | 17(19) | 42(20)   | 583(27)  | <0.001         |
| weight loss                                  | 38(18)  | 39(15)  | 44(22)   | 37(19)    | 41(14)  | 29(14)   | 36(13)  | 34(16)  | 9(10)  | 20(10)   | 327(15)  | 0.147          |
| felt sick /vomiting /nausea/loss of appetite | 42(20)  | 33(13)  | 31(16)   | 24(12)    | 33(12)  | 22(11)   | 45(16)  | 28(13)  | 3(3)   | 20(10)   | 281(13)  | 0.132          |
| coughing up blood-stained phlegm (sputum)    | 35(17)  | 32(13)  | 24(12)   | 31(16)    | 21(7)   | 16(8)    | 27(9)   | 25(12)  | 5(6)   | 23(11)   | 239(11)  | 0.014          |
| chest or shoulder pain                       | 23(11)  | 9(4)    | 18(9)    | 24(12)    | 10(4)   | 28(14)   | 43(15)  | 25(12)  | 4(5)   | 22(11)   | 206(10)  | <0.001         |
| other symptoms not listed above              | 51(24)  | 80(32)  | 59(30)   | 54(27)    | 63(22)  | 40(20)   | 30(10)  | 75(36)  | 26(30) | 42(20)   | 520(24)  | <0.001         |
| no symptoms                                  | 29(14)  | 24(10)  | 32(16)   | 21(11)    | 63(22)  | 50(25)   | 67(23)  | 36(17)  | 33(38) | 75(36)   | 430(20)  | <0.001         |
| missing                                      | 1(0.5)  | 16(6)   | 6(3)     | 17(9)     | 31(11)  | 9(4)     | 4(1)    | 4(2)    | 12(14) | 1(0.5)   | 101(5)   | <0.001         |
| <b>Presenting symptom (reported by PCP)</b>  | (N=85)  | (N=133) | (N=115)  | (N=0)     | (N=151) | (N=86)   | (N=61)  | (N=0)   | (N=17) | (N=81)   | (N=729)  |                |
| persistent cough                             | 33(39)  | 57(43)  | 45(39)   | n/a       | 67(44)  | 24(28)   | 18(30)  | n/a     | 7(41)  | 33(41)   | 284(39)  | 0.093          |
| breathlessness                               | 17(20)  | 27(20)  | 20(17)   | n/a       | 27(18)  | 11(13)   | 11(18)  | n/a     | 4(24)  | 13(16)   | 130(18)  | 0.803          |
| fatigue                                      | 1(1)    | 5(4)    | 3(3)     | n/a       | 9(6)    | 2(2)     | 2(3)    | n/a     | 1(6)   | 3(4)     | 26(4)    | 0.449          |
| weight loss                                  | 5(6)    | 9(7)    | 15(13)   | n/a       | 19(13)  | 3(3)     | 2(3)    | n/a     | 0(0)   | 5(6)     | 58(8)    | 0.027          |
| felt sick /vomiting /nausea/loss of appetite | 1(1)    | 1(0.8)  | 2(2)     | n/a       | 6(4)    | 2(2)     | 0(0)    | n/a     | 0(0)   | 0(0)     | 12(2)    | 0.312          |
| coughing up blood-stained phlegm (sputum)    | 8(9)    | 10(8)   | 10(9)    | n/a       | 7(5)    | 2(2)     | 3(5)    | n/a     | 0(0)   | 7(9)     | 47(6)    | 0.305          |
| chest or shoulder pain                       | 8(9)    | 10(8)   | 15(13)   | n/a       | 15(10)  | 1(1)     | 7(12)   | n/a     | 1(6)   | 4(5)     | 61(8)    | 0.08           |
| other symptoms not listed above              | 24(28)  | 44(33)  | 33(29)   | n/a       | 64(42)  | 15(17)   | 7(12)   | n/a     | 7(41)  | 20(25)   | 214(29)  | <0.001         |
| no symptoms                                  | 5(6)    | 6(5)    | 6(5)     | n/a       | 2(1)    | 31(36)   | 12(20)  | n/a     | 0(0)   | 10(12)   | 72(10)   | <0.001         |
| missing                                      | 7(8)    | 7(5)    | 11(10)   | n/a       | 16(11)  | 12(14)   | 6(10)   | n/a     | 2(12)  | 10(12)   | 71(10)   | 0.392          |

1  
2  
3  
4  
5  
6  
7  
8  
9  
10  
11  
12  
13  
14  
15  
16  
17  
18  
19  
20  
21  
22  
23  
24  
25  
26  
27  
28  
29  
30  
31  
32  
33  
34  
35  
36  
37  
38  
39  
40  
41  
42  
43  
44  
45  
46  
47

| Cancer-specificity of symptom presented |        |        |        |     |        |        |        |     |        |        |         |        |
|-----------------------------------------|--------|--------|--------|-----|--------|--------|--------|-----|--------|--------|---------|--------|
| cancer-specific symptom                 | 62(73) | 97(73) | 79(69) | n/a | 94(62) | 36(42) | 38(62) | n/a | 10(59) | 48(59) | 464(64) | <0.001 |
| non-specific symptom                    | 11(13) | 23(17) | 19(17) | n/a | 39(26) | 7(8)   | 5(8)   | n/a | 5(29)  | 13(16) | 122(17) |        |
| no symptoms /missing                    | 12(14) | 13(10) | 17(15) | n/a | 18(12) | 43(50) | 18(30) | n/a | 2(12)  | 20(25) | 143(19) |        |

<sup>1</sup> Differences between jurisdictions (excluding Victoria and Norway) were tested by the Pearson's Chi<sup>2</sup> test

For peer review only

### *Time intervals*

The observed time intervals are shown in Supplementary File 5, Table 2 and are summarised in Figure 2. Based on overall trends, jurisdictions could be grouped into those with reduced, longer and similar intervals to Wales (Table 5). It was not possible to interpret variations observed in Norway (small sample size) and Victoria (surgical cohort). In the remaining jurisdictions, there was no difference in the median adjusted patient interval compared to Wales. Denmark had shorter median adjusted primary care interval (-11 days); Sweden had shorter (-20) and Manitoba longer (+40) diagnostic intervals compared to Wales. Denmark (-13), Manitoba (-11), England (-9) and Northern Ireland (-4) had shorter treatment intervals. The median adjusted total interval was shorter only in Denmark (Table 5, Figure 2). The differences were greater for the 90<sup>th</sup> percentile. The total interval in patients who waited longest (90<sup>th</sup> percentile) was significantly shorter in two jurisdictions (Denmark -142, England -28 days) compared to Wales.

**Table 5.** Differences in adjusted intervals (days) between Wales and the other nine jurisdictions for lung cancer patients

| Intervals                                                                    | percentiles              | Wales             | Denmark                           | Sweden         | England        | N Ireland      | Scotland                                         | Manitoba                   | Ontario                          | Norway         | Victoria                                      |
|------------------------------------------------------------------------------|--------------------------|-------------------|-----------------------------------|----------------|----------------|----------------|--------------------------------------------------|----------------------------|----------------------------------|----------------|-----------------------------------------------|
|                                                                              |                          | Reference in days | Overall trend - shorter intervals |                |                |                | Similar with some intervals longer, some shorter |                            | Overall trend - longer intervals |                | Difficult to interpret (see text for reasons) |
| Ranking by 5-year survival rates for lung cancers diagnosed in 1999-2007 [5] |                          | 10                | 6                                 | 1              | 9              | 7              | 8                                                | 3                          | 2                                | 5              | 4                                             |
| Patient Interval                                                             | Number of patients       | 181               | 233                               | 172            | 213            | 179            | 169                                              | 133                        | 205                              | 55             | 141                                           |
|                                                                              | 50th percentile (95% CI) | 21                | -6 (-13,0)                        | -1 (-9,8)      | -3 (-10,5)     | -3 (-13,6)     | -3 (-10,4)                                       | 1 (-8,10)                  | 1 (-11,14)                       | 0 (-8,8)       | -9 (-16,-2)                                   |
|                                                                              | 75th percentile (95% CI) | 61                | -13 (-38,13)                      | -2 (-24,21)    | -2 (-42,37)    | -8 (-55,39)    | 1 (-25,27)                                       | 3 (-23,30)                 | -7 (-54,39)                      | -9 (-60,42)    | -4 (-46,38)                                   |
|                                                                              | 90th percentile (95% CI) | 216               | -34 (-55,-13)                     | -1 (-25,23)    | -15 (-42,12)   | 24 (-21,70)    | 43 (7,79)                                        | -35 (-59,-10)              | -34 (-66,-2)                     | 59 (21,96)     | -35 (-49,-21)                                 |
| Primary Care interval                                                        | Number of patients       | 110               | 159                               | N/A            | 147            | 124            | 119                                              | 80                         | 75                               | 19             | 89                                            |
|                                                                              | 50th percentile (95% CI) | 20                | -11 (-18,-3)                      | N/A            | -7 (-17,3)     | -5 (-15,4)     | -3 (-14,8)                                       | 7 (-8,21)                  | 5 (-9,19)                        | -11 (-18,-4)   | -8 (-17,1)                                    |
|                                                                              | 75th percentile (95% CI) | 43                | -29 (-47,-12)                     | N/A            | -17 (-42,8)    | 1 (-45,48)     | -11 (-36,14)                                     | 19 (-47,85)                | 20 (-72,112)                     | -10 (-57,37)   | -12 (-70,46)                                  |
|                                                                              | 90th percentile (95% CI) | 91                | -30 (-66,7)                       | N/A            | -39 (-85,6)    | 17 (-55,90)    | -20 (-67,25)                                     | 13 (-38,65)                | 102 (-56,258)                    | -22 (-109,66)  | -19 (-89,51)                                  |
| Diagnostic interval                                                          | Number of patients       | 176               | 229                               | 165            | 212            | 170            | 173                                              | 138                        | 212                              | 52             | 160                                           |
|                                                                              | 50th percentile (95% CI) | 45                | -12 (-25,1)                       | -20 (-35,-5)   | 9 (-3,21)      | 17 (-5,39)     | -4 (-16,8)                                       | 40 (14,66)                 | 10 (-6,26)                       | 4 (-16,24)     | 7 (-13,27)                                    |
|                                                                              | 75th percentile (95% CI) | 108               | -45 (-52,-39)                     | -22 (-30,-15)  | -7 (-20,7)     | 12 (2,22)      | -15 (-32,1)                                      | 35 (22,48)                 | 5 (-9,19)                        | -4 (-15,8)     | -2 (-8,4)                                     |
|                                                                              | 90th percentile (95% CI) | 162               | -27 (-153,99)                     | -34 (-206,138) | -14 (-100,72)  | 112 (-165,389) | 31 (-81,143)                                     | 112 (32,192)               | 106 (-122,335)                   | 0 (-93,93)     | 62 (10,114)                                   |
| Treatment interval                                                           | Number of patients       | 192               | 279                               | 190            | 238            | 200            | 187                                              | 182                        | 263                              | 87             | 199                                           |
|                                                                              | 50th percentile (95% CI) | 43                | -13 (-15,-11)                     | -2 (-8,3)      | -9 (-12,-5)    | -4 (-7,-2)     | 0 (-4,4)                                         | -11 (-17,-5)               | 3 (-4,10)                        | -8 (-11,-6)    | -29 (-32,-27)                                 |
|                                                                              | 75th percentile (95% CI) | 64                | -32 (-36,-28)                     | -2 (-8,4)      | -18 (-23,-13)  | -13 (-18,-7)   | 1 (-7,9)                                         | -5 (-16,6)                 | 6 (-2,14)                        | -13 (-19,-8)   | -33 (-41,-25)                                 |
|                                                                              | 90th percentile (95% CI) | 89                | -45 (-50,-40)                     | -10 (-17,-4)   | -28 (-36,-20)  | -16 (-23,-9)   | -6 (-14,1)                                       | 4 (-5,13)                  | 4 (-4,13)                        | -22 (-30,-14)  | -39 (-45,-32)                                 |
| Total interval                                                               | Number of patients       | 147               | 192                               | 147            | 176            | 153            | 143                                              | 117                        | 178                              | 52             | 113                                           |
|                                                                              | 50th percentile (95% CI) | 116               | -49 (-95,-3)                      | -8 (-64,47)    | -7 (-52,38)    | -16 (-41,10)   | -2 (-70,66)                                      | 11 (-41,63)                | 9 (-78,97)                       | -34 (-56,-12)  | -32 (-64,2)                                   |
|                                                                              | 75th percentile (95% CI) | 204               | -91 (-270,87)                     | -17 (-40,7)    | -29 (-175,118) | 5 (-191,201)   | 33 (-144,211)                                    | 13 (-77,103)               | -7 (-331,317)                    | -39 (-107,29)  | -23 (-61,14)                                  |
|                                                                              | 90th percentile (95% CI) | 365               | -142 (-150,-134)                  | -18 (-59,23)   | -28 (-37,-18)  | 0 (-4,5)       | 15 (-26,55)                                      | 15 (-26,55)                | 0 (-78,79)                       | -84 (-119,-49) | 0 (-3,3)                                      |
|                                                                              |                          |                   |                                   |                |                |                |                                                  | Interval relative to Wales |                                  | Trends         | Significant                                   |
|                                                                              |                          |                   |                                   |                |                |                |                                                  | Reduction                  |                                  |                |                                               |
|                                                                              |                          |                   |                                   |                |                |                |                                                  | Increase                   |                                  |                |                                               |

The majority of patients were diagnosed between 2013-14. The differences were calculated for the 50<sup>th</sup>, 75<sup>th</sup> and 90<sup>th</sup> percentiles by setting age to its mean value and gender and comorbidity to their modes (i.e. male gender and medium comorbidity). It is not possible to interpret differences observed for Norway (due to the small sample size) and Victoria (the cohort was limited to those who had undergone surgery).

---

**FIGURE 2**

---

*Sensitivity and validity analyses*

The estimates of routes to diagnosis, time intervals, and regression analysis trends were not significantly altered by changing the cut-off to 6 months or using only patient data (results not shown). Comparing the dates between the different data sources showed adequate agreement between all data sources for all categories of dates (CCC = 0.94 for date of treatment,  $CCC \geq 0.93$  for date of diagnosis, CCC = 0.91 for date of first presentation to primary care).

For peer review only

## Discussion

### *Main findings*

This is the first international study we are aware of comparing lung cancer routes and time intervals. With the exception of Denmark, in all other jurisdictions, the median total interval from symptom onset to treatment, for respondents diagnosed in 2012-15 was similar to that of Wales, the reference. However, there were jurisdiction specific differences in patient, diagnostic and treatment intervals, especially for the 10% of patients who waited the longest. Based on overall trends, jurisdictions could be grouped into those with trends of reduced, longer and similar intervals to Wales. Across jurisdictions, all symptoms other than persistent cough were less frequently reported by the PCP when compared to patients. This was especially true for fatigue and weight loss. One in four patients reported incidental diagnosis and one in ten were diagnosed following a visit to the emergency (A&E) department.

### *Strengths and weaknesses*

Strengths of this study include 1) its international setting; 2) use of cancer registries to identify consecutive newly diagnosed patients; 3) use of standardised questionnaires; 4) inclusion of PCP and CTS questionnaires enriched by registry data; 5) minimal data interpretation by the local teams with all data cleaning performed in a standardised manner centrally; and 6) triangulation with comprehensive data rules to ensure validity, consistency and preserve statistical precision.[20] Recall bias was minimised by the triangulation of different data sources and by patients completing the questionnaire within a limited time window (median 5 months) after the cancer diagnosis.

A key limitation, as with all questionnaire-based studies was non-response bias which varied across jurisdictions. In comparing intervals, we adjusted for age, sex and comorbidity but were unable to adjust for ethnicity and education due to different classification systems. Recruitment of patients up to 9 rather than 6 months after diagnosis might have magnified the selection bias due to high mortality.[28] However, sensitivity analysis suggests that this did not impact on the results. Categorising presenting symptoms into indicative or not was done pragmatically as existing guidelines for lung cancer investigation vary across ICBP jurisdictions.[29] In Norway and Victoria, a small sample size and restriction of eligibility to only surgical patients, respectively, made comparison difficult. Nonetheless, significant differences in these two jurisdictions compared to Wales were largely limited to the treatment interval alone, suggesting that despite sampling issues, the pathway to diagnosis was comparable.

1  
2  
3 There was variation in stage distribution across jurisdictions. While this may be partly related  
4 to the varying response rate, true differences in lung cancer stage have been noted on  
5 analysis of registry data of patients diagnosed between 2004-2007.[5] The high lung cancer  
6 mortality and self-selection are likely to have contributed to an over-representation of early  
7 stage disease and tumours treated with surgical resection. This suggests that true variation  
8 may well be higher than that reported in this cohort of 'healthier early stage' patients.  
9  
10  
11

### 12 13 *Comparison to other studies*

14 The most common patient-reported symptoms, in keeping with the literature, were persistent  
15 cough, breathlessness, fatigue and weight loss, with one in five reporting 'no symptoms'.<sup>[13]</sup>  
16 Only a minority (11%) of our respondents reported coughing blood or bloody sputum/spit,  
17 which is the only consistent predictor of lung cancer.<sup>[30]</sup> While haemoptysis was reported in  
18 a prospective survey (England 2011-12) by 22% of lung cancer patients identified through  
19 respiratory clinics, it was a presenting symptom in only 5% of cases.<sup>[6]</sup>  
20  
21  
22  
23  
24

25 As lung cancer mortality is higher in patients attending emergency (A&E) departments, the  
26 rates are often compared in an attempt to understand international survival differences.<sup>[31]</sup>  
27 The rate of respondents who attended A&E varied two-fold across jurisdictions from 9-10%  
28 in England, Scotland and Denmark to 18-20% in Northern Ireland, Ontario and Manitoba.  
29 While rates for Scotland (10%) were similar to that reported in a prospective Scottish audit  
30 (11.5%), as were rates for Denmark (7% vs 6.3% when PCP not involved), rates for England  
31 (9%) were lower than those reported in population based audits (25%) reflecting non-  
32 response bias.<sup>[9,10]</sup> In Victoria (4%) restriction of the cohort to surgical patients is likely to  
33 have accounted for the very low rates.  
34  
35  
36  
37  
38  
39

40 Our reported median patient, primary care and diagnostic intervals are in keeping with those  
41 previously reported from the participating jurisdictions (Table 6). Minor variations in interval  
42 estimates are likely due to differences in data source, sample size and cohort  
43 characteristics.<sup>[32]</sup> Longer intervals were reported from earlier cancer cohorts - median  
44 primary care interval for England of 52 days in 1998-2000 (our median 11),<sup>[8]</sup> median total  
45 interval for Denmark of 108 days in 2004-5 (our median 67) and Norway of 118 in 2002-5  
46 (our median 79).<sup>[12-14]</sup>  
47  
48  
49  
50  
51  
52  
53  
54  
55  
56  
57  
58  
59  
60

**Table 6.** Summary of literature on intervals in lung cancer patients diagnosed since 2000 in the ICBP Module 4 countries

| Study No | Ref                          | Study Period   | Jurisdiction        | Design                                                                                                                               | Patients                                                                                                                                              | No. of lung cancer patients      | Interval <sup>1</sup> (days)                                    |                         |                                                                    |                        | Total interval          |
|----------|------------------------------|----------------|---------------------|--------------------------------------------------------------------------------------------------------------------------------------|-------------------------------------------------------------------------------------------------------------------------------------------------------|----------------------------------|-----------------------------------------------------------------|-------------------------|--------------------------------------------------------------------|------------------------|-------------------------|
|          |                              |                |                     |                                                                                                                                      |                                                                                                                                                       |                                  | Patient                                                         | Primary care            | Diagnostic                                                         | Treatment              |                         |
| 1        | Walter FM et al (2015)       | 2011-2         | England, UK         | Prospective patient questionnaire survey - multi hospital cohort. Dates of diagnosis based on medical note review.                   | All attending urgent and routine respiratory clinics across the five hospitals in England aged over 40 years with symptoms suspicious of lung cancer. | 153                              | Interval from first symptom to diagnosis Median 91 (IQR 49-184) |                         |                                                                    |                        |                         |
| 2        | Lyratzopoulos G et al (2015) | 2009-10        | England, UK         | Prospective national audit of cancer diagnosis using primary practice patient records and continuous sampling during audit period    | All patients aged ≥15 years who had first presented to a primary care practitioner and were subsequently diagnosed with one of 28 cancers             | 1128                             | Median 11 (IQR 0-32)                                            | Median 3 (IQR 14-39)    |                                                                    |                        |                         |
| 3        | Neal R et al (2014)          | 2007-8         | UK                  | Retrospective analysis of electronic health record data from General Practice Research Database - population cohort                  | All newly diagnosed with one of 15 cancers                                                                                                            | 2851                             |                                                                 |                         | Median 112 (IQR 45-251)                                            |                        |                         |
| 4        | Barrett J et al (2008)       | 1998-2002      | Exeter, England, UK | Retrospective case-control review of PCP records - population cohort                                                                 | All with lung cancer aged ≥ 40 years, identified from the hospital cancer registry and computerised searches of all primary care practices            | 247                              |                                                                 | Median 52 (IQR 7-243)   | Interval from first symptom to diagnosis - Median 121 (IQR 53,261) |                        |                         |
| 5        | Baughan P et al (2009)       | 2005-6, 2007-8 | Scotland, UK        | Retrospective audit involving PCP review of medical records of all newly diagnosed cancer patients they had seen - population cohort | All newly diagnosed with lung cancer                                                                                                                  | 981                              | Median 9.5 (IQR 31)                                             |                         | Median 11 (IQR 28)                                                 |                        |                         |
| 6        | Guldbrandt LM et al (2015)   | 2010           | Denmark             | Retrospective PCP questionnaires survey of national registry-based population cohort                                                 | All consecutive newly diagnosed lung cancer patients                                                                                                  | 429-442 depending on interval    |                                                                 | Median 7 (IQR, 0-30)    | Median 29 (IQR, 12-69)                                             |                        |                         |
| 7        | Tørring ML et al (2013)      | 2004 - 5       | Aarhus, Denmark     | Prospective, population-based study using electronic health records and PCP survey of identified patients                            | All newly diagnosed with lung cancer after attending primary care                                                                                     | 262                              |                                                                 |                         | Median 112 (IQR 45-251)                                            |                        |                         |
| 8        | Hansen RP et al (2011)       | 2004-5         | Aarhus, Denmark     | Retrospective PCP survey                                                                                                             | Cancer patients newly diagnosed during a 1-year period identified using administrative registry data                                                  | 128-251 (depending on interval)  | Median 28 (IQR 7-56)                                            | Median 0 (IQR 0-9)      |                                                                    | Median 51 (IQR 27-76)  | Median 108 (IQR 82-167) |
| 9        | Bjerager M et al (2006)      | 2003           | Aarhus, Denmark     | Retrospective PCP survey using structured telephone interviews enriched with administrative registry data - population-based cohort  | All lung cancer patients identified through histological and cytological tests from county-based registers                                            | 84                               |                                                                 | Median 32.5 (IQR 12-68) |                                                                    |                        |                         |
| 10       | Rolke HB et al (2006)        | 2002-5         | Norway (South)      | Retrospective questionnaire-based patient survey - hospital cohort                                                                   | All newly diagnosed with lung cancer                                                                                                                  | 273 -376 (depending on interval) | Median 19 (2-77)                                                |                         |                                                                    |                        | Median 118 (IQR 68-220) |
| 11       | Stokstad T et al (2017)      | 2011-13        | Norway              | Retrospective medical record audit - single hospital cohort                                                                          | All cases that started diagnostic work-up and were diagnosed with lung cancer at St. Olavs Hospital, Trondheim                                        | 449                              |                                                                 |                         |                                                                    | 42 days (range: 2-296) |                         |
| 12       | Largey G et al (2016)        | 2013           | Victoria, Australia | Retrospective medical record audit - three hospital cohort                                                                           | Admitted with a new diagnosis of lung cancer over a three month period in three hospitals                                                             | 78                               |                                                                 |                         |                                                                    | Mean 30.4 (SD 45.3)    |                         |
| 13       | Evans SM et al (2016)        | 2011-4         | Victoria, Australia | Retrospective medical record audit - multi hospital cohort                                                                           | All lung cancer patients newly diagnosed in six public and two private hospitals                                                                      | 1417                             |                                                                 |                         | Median 15 (IQR, 5-36)                                              | Median 30 (IQR, 6-84)  |                         |
| 14       | Emery JD et                  | 2012 -         | Western             | Prospective cluster randomised trial of                                                                                              | Lung cancer patients newly diagnosed in                                                                                                               | 167                              | Interval from first symptom to                                  |                         |                                                                    |                        |                         |

1  
2  
3  
4  
5  
6  
7  
8  
9  
10  
11  
12  
13  
14  
15  
16  
17  
18  
19  
20  
21  
22  
23  
24  
25  
26  
27  
28  
29  
30  
31  
32  
33  
34  
35  
36  
37  
38  
39  
40  
41  
42  
43  
44  
45  
46  
47

|    | al (2017)                        | 4      | rural Australia      | symptom awareness                                                                                                                                                                         | the control arm of the trial                                                                       |      | diagnosis Median 34.5 (IQR 7-103.5) |           |                                                               |                         |
|----|----------------------------------|--------|----------------------|-------------------------------------------------------------------------------------------------------------------------------------------------------------------------------------------|----------------------------------------------------------------------------------------------------|------|-------------------------------------|-----------|---------------------------------------------------------------|-------------------------|
| 15 | Burneister BH et al (2010)       | 2000-4 | Queensland Australia | Retrospective analysis of radiation therapy waiting times                                                                                                                                 | All lung cancer patients who received radiation therapy as initial treatment at a public hospital. | 1535 |                                     |           |                                                               | Median 33 <sup>2</sup>  |
| 16 | Ellis PM and Vandermeer R (2011) | 2010   | Ontario, Canada      | Retrospective patient survey using structured telephone interviews - single centre cohort. Appointment dates and diagnostic tests verified through family doctor or patient chart review. | All lung cancer patients referred to a regional cancer centre                                      | 52   |                                     | Median 21 | Median 27 (IQR 0-38)                                          | Median 138 (IQR 79-175) |
| 17 | Lo DS et al (2007)               | 2005-7 | Ontario, Canada      | Retrospective medical record audit - multi hospital cohort                                                                                                                                | All with lung cancer seen on a newly implemented Time to Treat Program                             | 144  |                                     |           | Median interval from suspicion of lung cancer to diagnosis 37 |                         |

Intervals as defined in Figure 1; Limited to patients receiving radiation treatment

For peer review only

1  
2  
3  
4 Across all jurisdictions, there was no significant difference in primary care intervals for the  
5 10% of patients with longest interval. It is likely that these patients had vague or non-specific  
6 symptoms and signs. Referral guidelines for suspected lung cancer do not always favour  
7 patients with early symptoms and often prioritise those with more advanced disease.[33]  
8  
9 Access to better diagnostic tools such as low-dose CT chest in the primary care setting may  
10 favour this group of patients.[34] It would be useful in future projects to explore whether such  
11 access may have contributed to the improved 1-year lung cancer survival rates reported  
12 from Australia and Canada.[5]  
13  
14  
15  
16

17  
18 Diagnostic intervals were significantly longer for Manitoba. Of note, in 51% of the PCP  
19 responses presenting symptoms were missing or recorded as not present and date of first  
20 presentation was derived from patient as opposed to PCP. While this may explain why the  
21 diagnostic interval was twice that reported from ongoing local audit (personal  
22 communication), for date of first presentation, the concordance co-efficient between PCP  
23 and patients at Manitoba was 0.94, which suggest adequate agreement.  
24  
25  
26  
27

28 Observed median treatment intervals were below 6 weeks for nearly all jurisdictions. This  
29 was the only interval where there were significant differences between jurisdictions with  
30 Denmark, England, Norway and Northern Ireland all having shorter adjusted treatment  
31 intervals across all percentiles, with larger differences for the 75<sup>th</sup> and 90<sup>th</sup> percentile. These  
32 improvements may reflect implementation of waiting time targets in Denmark (35-38 days  
33 from first consultation depending on treatment modality) and the UK (31 days from decision  
34 to treat).[35,36] The shorter treatment intervals in Norway are in keeping with long-standing  
35 provision of standardised cancer care pathways and effective coordination between primary  
36 care and treatment centers. While a systematic review did not find evidence to support an  
37 association between intervals and lung cancer outcomes, increasing mortality with longer  
38 diagnostic intervals was noted in a more recent, high-quality study.[11] In 2000, O'Rourke  
39 reported median delays of 94 days (35-187) between the first hospital visit and starting  
40 treatment resulting in 21% of potentially curable patients becoming incurable.[37] Others  
41 have found metabolic evidence on PET/CT of pre-treatment disease progression in 21% and  
42 TNM upstaging in 18% of small-cell lung cancer patients after a relatively short median inter-  
43 scan interval of 43 days.[38] Delays can also result in deterioration in performance status.  
44 More recently, there is concern that the use of genotyping prior to starting treatment may  
45 introduce additional delays.  
46  
47  
48  
49  
50  
51  
52  
53  
54  
55  
56  
57  
58  
59  
60

1  
2  
3 The shorter total interval in Denmark likely reflects the significant reductions in cancer  
4 waiting times following implementation of national Danish Cancer Patient Pathways (CPPs)  
5 including PCP access to fast-track diagnostic work-up.[39] The findings are in keeping with  
6 higher relative survival and lower mortality in Denmark among symptomatic cancer patients  
7 diagnosed through primary care after the implementation of CPPs and with the accelerated  
8 increase in 5-year survival among Danish lung cancer patients diagnosed in 2010-2014  
9 when compared to patients from earlier time periods.[40] While there is some inherent lead-  
10 time bias, the findings highlight the importance and feasibility of a timely diagnosis of lung  
11 cancer.  
12  
13  
14  
15

### 16 17 *Conclusions*

18 The study provides for the first time, comparable data allowing for detailed evaluation  
19 between jurisdictions of routes and intervals from symptom onset to treatment in lung  
20 cancer. Across countries there were discrepancies in symptoms, especially fatigue and  
21 weight loss reported by patients and their primary care physicians. The findings highlight  
22 differences especially for patients who waited the longest and quantifies achievements, thus  
23 allowing for more focused policy and practice initiatives. Some jurisdictions may be able to  
24 revise the organisation of pathways to shorten time intervals and ultimately improve patient  
25 experience and outcomes.  
26  
27

28 Future analysis will explore the impact of these intervals on stage and survival. Meanwhile,  
29 our results draw attention to the success of secondary care initiatives in decreasing  
30 treatment intervals and underlines the need for more concerted efforts in primary care.  
31  
32  
33  
34  
35  
36  
37  
38  
39  
40  
41  
42  
43  
44  
45  
46  
47  
48  
49  
50  
51  
52  
53  
54  
55  
56  
57  
58  
59  
60

### List of abbreviations

ICBP M4 – International Cancer Benchmarking Partnership Module 4

PCP – Primary Care Physician

CTS – Cancer Treatment Specialist

CPP – Danish Cancer Patient Pathways

### Acknowledgement

We are grateful to Catherine Foot, Martine Bomb, Brad Groves of Cancer Research UK for managing the programme. The ICBP Module 4 Working Group (Supplementary File 6) for their support and work keeping the study going. Christian Finley (Canada), David Baldwin (England) for reviewing the manuscript. Stefan Bergström, Jan Willem Coebergh, Jon Emery, Monique E van Leerdam, Marie-Louise Essink-Bot and Una MacLeod (the ICBP M4 Academic Reference Group) for providing independent peer review of the study protocol and analysis plan development. We thank all the patients, primary care physicians, cancer treatment specialists, and registry staff of all jurisdictions who took part in this study, and also the Danish Lung Cancer Registry for providing clinical information for the study.

### ICBP Programme Board:

Aileen Keel (Scottish Government, Edinburgh, Scotland); Anna Boltong (Cancer Council Victoria, Carlton, Australia); Anna Gavin (Northern Ireland Cancer Registry, Queens University, Belfast, UK); David Currow (Cancer Institute New South Wales, Sydney, Australia); Gareth Davies (Wales Cancer Network, Cardiff, UK); Gunilla Gunnarsson (Swedish Association of Local Authorities and Regions, Stockholm, Sweden); Heather Bryant (Canadian Partnership Against Cancer, Toronto, Canada); Jane Hanson (Welsh Cancer National Specialist Advisory Group, Cardiff, UK); Kathryn Whitfield (Department of Health, Victoria Australia); Linda Rabeneck (Cancer Care Ontario, Toronto, Canada); Michael A Richards (Care Quality Commission, London, UK); Michael Sherar (Cancer Care Ontario, Toronto, Canada); Nicola Quin (Cancer Council Victoria, Carlton, Australia); Nicole Mittmann (Cancer Care Ontario, Toronto, Canada); Robert Thomas (Department of Health and Human Services, Victoria, Melbourne, Australia); Sara Hiom (Cancer Research UK); Sean Duffy (NHS England, London, UK); Chris Harrison (NHS England, London, UK); Søren Brostrøm (Danish Health and Medicines Authority, Copenhagen, Denmark); Stein Kaasa (University Hospital of Trondheim, Trondheim, Norway).

### Author's contribution

1  
2  
3 UM, DW, PV, AZF, HJ planned the study design, data collection, carried out the analyses  
4 and wrote the draft manuscript. UM, PV, DW, HJ, AB, AKK, RJB, DHB, JK, VC, ATG, EG,  
5 EH, ML, RJW, YL, MM, DT, RDN, VW, IR and SH were responsible for local data collection  
6 (alongside the Working Group), management and interpretation, and have participated in  
7 writing and have approving the final manuscript version. JB, OB and OTB provided advice  
8 on the interpretation of results in their respective jurisdictions and comments or substantial  
9 edits on the manuscript, approving the final version.  
10  
11  
12

### 13 14 **Competing Interests**

15 None  
16  
17  
18

### 19 **Funding:**

20 This work was supported by: CancerCare Manitoba; Cancer Care Ontario; Canadian  
21 Partnership Against Cancer (CPAC); Cancer Council Victoria; Cancer Research Wales;  
22 Cancer Research UK; Danish Cancer Society; Danish Health and Medicines Authority;  
23 European Palliative Care Research Centre (PRC), Norwegian University of Science and  
24 Technology (NTNU); Northern Ireland Guidelines Audit and Implementation Network (GAIN);  
25 Macmillan Cancer Support; National Cancer Action Team; NHS England; Northern Ireland  
26 Cancer Registry, funded by the Public Health Agency NI; Norwegian Directorate of Health;  
27 Research Centre for Cancer Diagnosis in Primary Care (CaP), Aarhus University, Denmark;  
28 Scottish Government; Swedish Association of Local Authorities and Regions; University  
29 College London and NIHR Biomedical Research Centre at University College London NHS  
30 Foundation Trust; University of Edinburgh; Victorian Department of Health and Human  
31 Services; Welsh Government. The funding bodies had no influence on the design of the  
32 study and collection, analysis, and interpretation of data, in writing the manuscript or whether  
33 to publish the results.  
34  
35  
36  
37  
38  
39  
40  
41  
42

### 43 **Availability of data and material**

44 The data that support the findings of this study are available from the named authors from  
45 each ICBP jurisdiction, but restrictions apply to the availability of these data and so are not  
46 publicly available. Data are however available from the authors upon reasonable request  
47 and with permission of the ICBP Programme Board. Please contact the ICBP Programme  
48 Management team, based at Cancer Research UK, with any queries ([icbp@cancer.org.uk](mailto:icbp@cancer.org.uk)).  
49  
50  
51

### 52 **Ethics approval and consent to participate**

53  
54  
55  
56  
57  
58  
59  
60

1  
2  
3 For each local data collection, there were specific procedures and approvals which included  
4 anonymised data transfer to University College London and Aarhus University. Approvals  
5 were received from the following institutions: Cancer Council Victoria Human Research  
6 Ethics Committee [HREC 1125]; Health Research Ethics Board, University of Manitoba  
7 [HS15227 (H2012:105)]; Research Resource Ethics Committee, CancerCare Manitoba  
8 [RRIC#28-2012]; University of Toronto Research Ethics Board [27881]; The Danish Data  
9 Protection Agency [2013-41-2030]; Swedish Ethics Review Board, Uppsala [2013/306];  
10 Norway Regional committees for medical and health research ethics [2013/136/REK nord];  
11 England, Wales and Scotland, NRES Committee East Midlands – Derby 2, local R&D for  
12 each health board [11/EM/0420]; Northern Ireland ORECNI Ethical approval, local  
13 governance for each health Trust [11/EM/0420].  
14  
15  
16  
17  
18  
19  
20  
21  
22  
23  
24  
25  
26  
27  
28  
29  
30  
31  
32  
33  
34  
35  
36  
37  
38  
39  
40  
41  
42  
43  
44  
45  
46  
47  
48  
49  
50  
51  
52  
53  
54  
55  
56  
57  
58  
59  
60

## References

1. Ferlay J, Steliarova-Foucher E, Lortet-Tieulent J, et al. Cancer incidence and mortality patterns in Europe: Estimates for 40 countries in 2012. *Eur J Cancer* 2013;49(6):1374-403.
2. Allemani C, Weir HK, Carreira H, et al. Global surveillance of cancer survival 1995-2009: analysis of individual data for 25 676 887 patients from 279 population-based registries in 67 countries (CONCORD-2). *Lancet* 2015;385(9972):977-1010.
3. Neal RD, Robb e IJ, Lewis M, Williamson I, Hanson J. The complexity and difficulty of diagnosing lung cancer: findings from a national primary-care study in Wales. *Prim Health Care Res Dev* 2015 Sep;16(5):436-49
4. Francisci S, Minicozzi P, Pierannunzio D, et al. Survival patterns in lung and pleural cancer in Europe 1999-2007: Results from the EURO CARE-5 study. *Eur J Cancer* 2015;51(15):2242-53.
5. Coleman MP, Forman D, Bryant H, et al. Cancer survival in Australia, Canada, Denmark, Norway, Sweden, and the UK, 1995-2007 (the International Cancer Benchmarking Partnership): an analysis of population-based cancer registry data. *Lancet* 2011;377(9760):127-38.
6. Walter FM, Rubin G, Bankhead C, et al. Symptoms and other factors associated with time to diagnosis and stage of lung cancer: a prospective cohort study. *Br J Cancer* 2015;112 Suppl 1:S6-13.
7. Neal RD, Din NU, Hamilton W, et al. Comparison of cancer diagnostic intervals before and after implementation of NICE guidelines: analysis of data from the UK General Practice Research Database. *Br J Cancer* 2014;110(3):584-92.
8. Barrett J, Hamilton W. Pathways to the diagnosis of lung cancer in the UK: a cohort study. *BMC Fam Pract* 2008;9:31.
9. Baughan P, O'Neill B, Fletcher E. Auditing the diagnosis of cancer in primary care: the experience in Scotland. *Br J Cancer* 2009;101 Suppl 2:S87-91.
10. Guldbrandt LM, Fenger-Gron M, Rasmussen TR, et al. The role of general practice in routes to diagnosis of lung cancer in Denmark: a population-based study of general practice involvement, diagnostic activity and diagnostic intervals. *BMC Health Serv Res* 2015;15:21.
11. Topping ML, Frydenberg M, Hansen RP, et al. Evidence of increasing mortality with longer diagnostic intervals for five common cancers: a cohort study in primary care. *Eur J Cancer* 2013;49(9):2187-98.
12. Hansen RP, Vedsted P, Sokolowski I, et al. Time intervals from first symptom to treatment of cancer: a cohort study of 2,212 newly diagnosed cancer patients. *BMC Health Serv Res* 2011;11:284.

13. Bjerager M, Palshof T, Dahl R, et al. Delay in diagnosis of lung cancer in general practice. *Br J Gen Pract* 2006;56(532):863-8.
14. Rolke HB, Bakke PS, Gallefoss F. Delays in the diagnostic pathways for primary pulmonary carcinoma in Southern Norway. *Respir Med* 2007;101(6):1251-7.
15. Largey G, Ristevski E, Chambers H, et al. Lung cancer interval times from point of referral to the acute health sector to the start of first treatment. *Aust Health Rev* 2016.
16. Evans SM, Earnest A, Bower W, et al. Timeliness of lung cancer care in Victoria: a retrospective cohort study. *Med J Aust* 2016;204(2):75 e1-9.
17. Ellis PM, Vandermeer R. Delays in the diagnosis of lung cancer. *J Thorac Dis* 2011;3(3):183-8.
18. Lo DS, Zeldin RA, Skrastins R, et al. Time to treat: a system redesign focusing on decreasing the time from suspicion of lung cancer to diagnosis. *J Thorac Oncol* 2007;2(11):1001-6.
19. Butler J, Foot C, Bomb M, et al. The International Cancer Benchmarking Partnership: an international collaboration to inform cancer policy in Australia, Canada, Denmark, Norway, Sweden and the United Kingdom. *Health Policy* 2013;112(1-2):148-55.
20. Weller D, Vedsted P, Anandan C, et al. An investigation of routes to cancer diagnosis in 10 international jurisdictions, as part of the International Cancer Benchmarking Partnership: survey development and implementation. *BMJ Open* 2016;6(7):e009641.
21. Weller D, Vedsted P, Rubin G, et al. The Aarhus statement: improving design and reporting of studies on early cancer diagnosis. *Br J Cancer* 2012;106(7):1262-7.
22. Jenkinson C, Coulter A, Wright L. Short form 36 (SF36) health survey questionnaire: normative data for adults of working age. *Bmj*. 1993 May 29;306(6890):1437-40
23. TNM classification of malignant tumours / edited by L.H. Sobin, M.K. Gospodarowicz, and Ch. Wittekind. — 7th ed. UICC International Union Against Cancer. ISBN 978-1-4443-3241-4
24. Koenker R, Bassett G. Regression quantiles. *Econometrica* 1978; 46:33-50
25. Machado JAF, Santos Silva JMC. Quantiles for Counts. *J Amer Statistical Assoc* 2005, 100(472): 1226-1237.
26. Miranda A. QCOUNT: Stata program to fit quantile regression models for count data. Boston: Boston College Department of Economics; 2006
27. Lin LI. A concordance correlation coefficient to evaluate reproducibility. *Biometrics* 1989;45(1):255-68.

- 1  
2  
3 28. Walters S, Maringe C, Coleman MP, et al. Lung cancer survival and stage at diagnosis  
4 in Australia, Canada, Denmark, Norway, Sweden and the UK: a population-based  
5 study, 2004-2007. *Thorax* 2013;68(6):551-64.
- 6  
7 29. Nicholson BD, Mant D, Neal RD, et al. International variation in adherence to referral  
8 guidelines for suspected cancer: a secondary analysis of survey data. *Br J Gen Pract*  
9 2016;66(643):e106-13.
- 10  
11 30. Shim J(1), Brindle L, Simon M, George S. A systematic review of symptomatic  
12 diagnosis of lung cancer. *Fam Pract*. 2014 Apr;31(2):137-48
- 13  
14 31. Hamilton W, Peters TJ, Round A, et al. What are the clinical features of lung cancer  
15 before the diagnosis is made? A population based case-control study. *Thorax*  
16 2005;60(12):1059-65.
- 17  
18 32. Beckett P, Tata LJ, Hubbard RB. Risk factors and survival outcome for non-elective  
19 referral in non-small cell lung cancer patients-analysis based on the National Lung  
20 Cancer Audit. *Lung Cancer* 2014;83(3):396-400.
- 21  
22 33. Lim A, Mesher D, Gentry-Maharaj A, et al. Time to diagnosis of Type I or II invasive  
23 epithelial ovarian cancers: a multicentre observational study using patient questionnaire  
24 and primary care records. *BJOG* 2016;123(6):1012-20.
- 25  
26 34. Neal RD, Allgar VL, Ali N, et al. Stage, survival and delays in lung, colorectal, prostate  
27 and ovarian cancer: comparison between diagnostic routes. *Br J Gen Pract*  
28 2007;57(536):212-9.
- 29  
30 35. Guldbrandt LM, Moller H, Jakobsen E, et al. General practice consultations, diagnostic  
31 investigations, and prescriptions in the year preceding a lung cancer diagnosis. *Cancer*  
32 *Med* 2017;6(1):79-88.
- 33  
34 36. Danish National Board of Health. Pakkeforløb for lungekræft [Cancer Patient Pathway –  
35 Lung Cancer], 2016) National Board of Health, Copenhagen. Available at:  
36 [https://www.sst.dk/da/sygdom-og-](https://www.sst.dk/da/sygdom-og-behandling/kraeft/pakkeforloeb/~media/89192ECB2709401CAD8E4BBB0304691E.as)  
37 [behandling/kraeft/pakkeforloeb/~media/89192ECB2709401CAD8E4BBB0304691E.as](https://www.sst.dk/da/sygdom-og-behandling/kraeft/pakkeforloeb/~media/89192ECB2709401CAD8E4BBB0304691E.as)  
38 [hx](https://www.sst.dk/da/sygdom-og-behandling/kraeft/pakkeforloeb/~media/89192ECB2709401CAD8E4BBB0304691E.as) [accessed 25 September 2017]
- 39  
40 37. O'Rourke N, Edwards R. Lung cancer treatment waiting times and tumour growth. *Clin*  
41 *Oncol (R Coll Radiol)*. 2000;12(3):141-4.
- 42  
43 38. Wang J, Mahasittiwat P, Wong KK, et al. Natural growth and disease progression of  
44 non-small cell lung cancer evaluated with 18F-fluorodeoxyglucose PET/CT. *Lung*  
45 *Cancer* 2012;78(1):51-6.
- 46  
47 39. Jensen H, Tørring ML, Vedsted P. Prognostic consequences of implementing cancer  
48 patient pathways in Denmark: a comparative cohort study of symptomatic cancer  
49 patients in primary care. *BMC Cancer* 2017;17:627.
- 50  
51 40. Allemani C, Matsuda T, Di Carlo V, et al. Global surveillance of trends in cancer  
52 survival 2000–14 (CONCORD-3): analysis of individual records for 37 513 025 patients  
53  
54  
55  
56  
57  
58  
59

1  
2  
3  
4  
5  
6  
7  
8  
9  
10  
11  
12  
13  
14  
15  
16  
17  
18  
19  
20  
21  
22  
23  
24  
25  
26  
27  
28  
29  
30  
31  
32  
33  
34  
35  
36  
37  
38  
39  
40  
41  
42  
43  
44  
45  
46  
47  
48  
49  
50  
51  
52  
53  
54  
55  
56  
57  
58  
59  
60

diagnosed with one of 18 cancers from 322 population-based registries in 71 countries.  
Lancet 2018 Mar 17;391(10125):1023-1075.

For peer review only

1  
2  
3  
4  
5  
6 **Figure 1:** Time intervals from onset of symptoms to start of treatment based on the Aarhus  
7 Statement [21]  
8  
9  
10

11 **Figure 2:** Differences in 50<sup>th</sup>, 75<sup>th</sup> and 90<sup>th</sup> percentiles of the intervals (days) between Wales  
12 as the reference and the other nine jurisdictions.  
13

14 *The data are adjusted for differences in age, gender and comorbidity. The bars in black show*  
15 *significant differences in intervals.*  
16  
17  
18  
19  
20  
21  
22  
23  
24  
25  
26  
27  
28  
29  
30  
31  
32  
33  
34  
35  
36  
37  
38  
39  
40  
41  
42  
43  
44  
45  
46  
47  
48  
49  
50  
51  
52  
53  
54  
55  
56  
57  
58  
59  
60

1  
2  
3  
4  
5  
6  
7  
8  
9  
10  
11  
12  
13  
14  
15  
16  
17  
18  
19  
20  
21  
22  
23  
24  
25  
26  
27  
28  
29  
30  
31  
32  
33  
34  
35  
36  
37  
38  
39  
40  
41  
42  
43  
44  
45  
46  
47  
48  
49  
50  
51  
52  
53  
54  
55  
56  
57  
58  
59  
60



Time intervals from onset of symptoms to start of treatment based on the Aarhus Statement [21]

209x297mm (300 x 300 DPI)



Differences in 50th, 75th and 90th percentiles of the intervals (days) between Wales as the reference and the other nine jurisdictions.

420x297mm (300 x 300 DPI)



# International Cancer Benchmarking Partnership Module 4

## Patient questionnaire Lung Cancer

Thank you very much for taking the time to fill in this questionnaire – it should take about 20 minutes to complete. We are sending the questionnaire to a large sample of people who we understand have had a diagnosis of lung cancer. If this has been sent to you in error and you do not have cancer, please do not continue and return the documents in the prepaid envelope.

Our aim is to gain a better understanding of the process by which people have their cancer diagnosed. We would also like to find out more about the symptoms they experience (if any), and the pathway they follow from start of symptoms to treatment of their cancer. This will help in identifying ways in which cancers can be diagnosed quickly and effectively. Thank you once again for your time.

**This information is confidential and will not be passed to anyone involved in your treatment.**

Name:

---

Date of Birth:

---

Address:

---

---

---

## Consent form

---

Please read the consent form and sign your name and date **BELOW**.

If you require any clarification, please do not hesitate to ring the study team members. Their contact details are found on the information sheet.

Please be reassured that your responses are completely confidential and will not be passed to anyone involved in your treatment. For the purposes of the study it is important that you agree to consent to all the statements listed below.

- I confirm that I have read the attached information sheet and I understand why the research is being done.
- I am willing for the team to request information from my GP and hospital doctors which is relevant to the audit as described in the information sheet.
- I give permission for my details (name, address) to be given to the cancer registry (NHS Information Centre for Health and Social Care) for follow up.
- I agree for the information I have provided and any other relevant information from my medical records to be stored as described in the information sheet under the custodianship of University College London.
- I consent to sharing of coded data which contains no personal identifiers between researchers, some of whom are located outside the European Union.
- I consent for use of my data if I become mentally incapacitated during the course of the project.

**I agree to all the statements listed and consent to participate in the study.**

Name (Please print)

---

Signature:

---

Date:

---

If we have any questions, may we phone you for clarification?  
(Please tick)

Yes  No

If **Yes**, please provide your telephone number:

---



1  
2  
3  
4  
5  
6  
7  
8  
9  
10  
11  
12  
13  
14  
15  
16  
17  
18  
19  
20  
21  
22  
23  
24  
25  
26  
27  
28  
29  
30  
31  
32  
33  
34  
35  
36  
37  
38  
39  
40  
41  
42  
43  
44  
45  
46  
47  
48  
49  
50  
51  
52  
53  
54  
55  
56  
57  
58  
59  
60

**1. Please can you confirm the details of your GP/GP practice (name, practice address – as best as you can remember): We appreciate that you may have more than one GP involved in your care – in which case, we are interested in the GP you would say provides the majority of your care, particularly relating to the cancer you’ve had diagnosed.**

Name of doctor

Name of practice

Address

Postcode

Town

For peer review only

# Sample



1  
2  
3  
4  
5  
6  
7  
8  
9  
10  
11  
12  
13  
14  
15  
16  
17  
18  
19  
20  
21  
22  
23  
24  
25  
26  
27  
28  
29  
30  
31  
32  
33  
34  
35  
36  
37  
38  
39  
40  
41  
42  
43  
44  
45  
46  
47  
48  
49  
50  
51  
52  
53  
54  
55  
56  
57  
58  
59  
60

**3. The following health concerns or symptoms are commonly experienced with lung cancer.**

|                                |
|--------------------------------|
| Cough                          |
| Breathlessness                 |
| Being short of breath          |
| Chest pain / Pain on breathing |
| Coughing up blood              |
| Bloody sputum/blood in spit    |
| Unexplained weight loss        |
| Loss of appetite               |
| Fatigue                        |

**Please write down ALL health concern(s) or symptom(s) you may have had before contacting a doctor or taking part in screening. It does not matter if they are not included in the list above:**

|                                                                       |
|-----------------------------------------------------------------------|
| Please write your health concern(s) or symptom(s) in the boxes below: |
| 1)                                                                    |
| 2)                                                                    |
| 3)                                                                    |
| 4)                                                                    |
| 5)                                                                    |
| 6)                                                                    |



|                                                                              |                          |
|------------------------------------------------------------------------------|--------------------------|
| This is not applicable to me (e.g. I did not have any symptoms), please tick | <input type="checkbox"/> |
|------------------------------------------------------------------------------|--------------------------|

1  
2  
3  
4  
5  
6 **4. Please write down your best estimate of the date you noticed the first of**  
7 **these health concern(s) or symptom(s).** If you cannot remember the exact date,  
8 you can fill in the month and the year.  
9

10 Day (optional), month, year

|   |   |   |   |   |   |   |   |
|---|---|---|---|---|---|---|---|
| D | D | M | M | Y | Y | Y | Y |
|---|---|---|---|---|---|---|---|



|                                                                    |                          |
|--------------------------------------------------------------------|--------------------------|
| This is not applicable to me (e.g. I had no symptoms), please tick | <input type="checkbox"/> |
|--------------------------------------------------------------------|--------------------------|

11  
12  
13  
14  
15  
16  
17  
18  
19  
20  
21 **5. Approximately how long did you have health concern(s) or symptom(s)**  
22 **before contacting a doctor? (Please think of the first visit to the doctor, not**  
23 **re-visits after that).** Please tick only **ONE** answer.  
24  
25



|                     |                          |
|---------------------|--------------------------|
| Less than 1 week    | <input type="checkbox"/> |
| 1-2 weeks           | <input type="checkbox"/> |
| 3-4 weeks           | <input type="checkbox"/> |
| 5-7 weeks           | <input type="checkbox"/> |
| 2-5 months          | <input type="checkbox"/> |
| 6-12 months         | <input type="checkbox"/> |
| More than 12 months | <input type="checkbox"/> |



|                                                                    |                          |
|--------------------------------------------------------------------|--------------------------|
| This is not applicable to me (e.g. I had no symptoms), please tick | <input type="checkbox"/> |
|--------------------------------------------------------------------|--------------------------|

1  
2  
3  
4  
5  
6 **6a. Once you contacted a practice about your health concern(s) or symptom(s),**  
7 **how long did it take to get an appointment with a doctor? (Please think of**  
8 **the first visit to the doctor, to discuss your health concern(s) or symptom(s)).**

9 Please tick only **ONE** answer. ✓

|                            |                                                                                         |                          |
|----------------------------|-----------------------------------------------------------------------------------------|--------------------------|
| 10<br>11<br>12<br>13<br>14 | Same day/next day                                                                       | <input type="checkbox"/> |
| 15<br>16<br>17<br>18<br>19 | Within 1 week                                                                           | <input type="checkbox"/> |
| 20<br>21<br>22<br>23       | 1-2 weeks                                                                               | <input type="checkbox"/> |
| 24<br>25<br>26<br>27       | 3-4 weeks                                                                               | <input type="checkbox"/> |
| 28<br>29<br>30<br>31       | Longer                                                                                  | <input type="checkbox"/> |
| 32<br>33<br>34<br>35       | If there was no waiting time<br>(e.g. you went/were taken to A&E), please tick this box | <input type="checkbox"/> |
| 36<br>37<br>38<br>39       | This is not applicable to me (e.g. I had no symptoms), please tick                      | <input type="checkbox"/> |

40  
41  
42  
43  
44  
45  
46  
47  
48  
49  
50  
51  
52  
53  
54  
55  
56  
57  
58  
59  
60

**6b. What was the date you first saw your doctor about your health concern(s) or symptom(s)?** If you cannot remember the exact date, you can fill in the month and the year.

Day (optional), month, year

|   |   |   |   |   |   |   |   |
|---|---|---|---|---|---|---|---|
| D | D | M | M | Y | Y | Y | Y |
|---|---|---|---|---|---|---|---|

|                                                                                                                            |                                                                    |                          |
|----------------------------------------------------------------------------------------------------------------------------|--------------------------------------------------------------------|--------------------------|
| 40<br>41<br>42<br>43<br>44<br>45<br>46<br>47<br>48<br>49<br>50<br>51<br>52<br>53<br>54<br>55<br>56<br>57<br>58<br>59<br>60 | This is not applicable to me (e.g. I had no symptoms), please tick | <input type="checkbox"/> |
|----------------------------------------------------------------------------------------------------------------------------|--------------------------------------------------------------------|--------------------------|

7. How many times did you visit the following for the investigation of your symptoms before your cancer was diagnosed?

|                                             |                                        |
|---------------------------------------------|----------------------------------------|
|                                             | Please write down the number of visits |
| GP                                          |                                        |
| Hospital                                    |                                        |
| Consultant/specialist outside of a hospital |                                        |



|                                                                    |                          |
|--------------------------------------------------------------------|--------------------------|
| This is not applicable to me (e.g. I had no symptoms), please tick | <input type="checkbox"/> |
|--------------------------------------------------------------------|--------------------------|

8a. After your doctor referred you to a specialist, how long did it take you to get an appointment? Please tick only **ONE** answer.



|                     |                          |
|---------------------|--------------------------|
| Less than 1 week    | <input type="checkbox"/> |
| 1-2 weeks           | <input type="checkbox"/> |
| 3-4 weeks           | <input type="checkbox"/> |
| 5-7 weeks           | <input type="checkbox"/> |
| 2-5 months          | <input type="checkbox"/> |
| 6-12 months         | <input type="checkbox"/> |
| More than 12 months | <input type="checkbox"/> |



|                                                                             |                          |
|-----------------------------------------------------------------------------|--------------------------|
| This is not applicable to me (e.g. my doctor did not refer me), please tick | <input type="checkbox"/> |
|-----------------------------------------------------------------------------|--------------------------|



1  
2  
3  
4  
5  
6  
7  
8  
9  
10  
11  
12  
13  
14  
15  
16  
17  
18  
19  
20  
21  
22  
23  
24  
25  
26  
27  
28  
29  
30  
31  
32  
33  
34  
35  
36  
37  
38  
39  
40  
41  
42  
43  
44  
45  
46  
47  
48  
49  
50  
51  
52  
53  
54  
55  
56  
57  
58  
59  
60

**8b. What was the date of your first appointment with a doctor, involved in investigating and/or treating your cancer, to whom you were referred?**

If you cannot remember the exact date, you can fill in the month and the year.

Day (optional), month, year

|   |   |   |   |   |   |   |   |
|---|---|---|---|---|---|---|---|
| D | D | M | M | Y | Y | Y | Y |
|---|---|---|---|---|---|---|---|



|                                                                             |                          |
|-----------------------------------------------------------------------------|--------------------------|
| This is not applicable to me (e.g. my doctor did not refer me), please tick | <input type="checkbox"/> |
|-----------------------------------------------------------------------------|--------------------------|

**9. What was the date you were told you had cancer?** If you cannot remember the exact date, you can fill in the month and the year.

Day (optional), month, year

|   |   |   |   |   |   |   |   |
|---|---|---|---|---|---|---|---|
| D | D | M | M | Y | Y | Y | Y |
|---|---|---|---|---|---|---|---|

Sample  
review only

**10. Have you had any of the following treatments for your cancer yet? If so, please can you estimate the date this treatment started?** Please tick **ALL** that apply. If you cannot remember the exact date, you can fill in the month and the year.

|    | Type of treatment         |                                                                           | Date of treatment<br>(give first date if you had more than one)                                                                                                                                                                                           |
|----|---------------------------|---------------------------------------------------------------------------|-----------------------------------------------------------------------------------------------------------------------------------------------------------------------------------------------------------------------------------------------------------|
| a. | Surgery                   | <input type="checkbox"/> <b>Yes</b><br><input type="checkbox"/> <b>No</b> | Day (optional), month, year<br><div style="border: 1px solid black; padding: 2px; display: flex; justify-content: space-around;"> <span>D</span><span>D</span><span>M</span><span>M</span><span>Y</span><span>Y</span><span>Y</span><span>Y</span> </div> |
| b. | Chemotherapy              | <input type="checkbox"/> <b>Yes</b><br><input type="checkbox"/> <b>No</b> | Day (optional), month, year<br><div style="border: 1px solid black; padding: 2px; display: flex; justify-content: space-around;"> <span>D</span><span>D</span><span>M</span><span>M</span><span>Y</span><span>Y</span><span>Y</span><span>Y</span> </div> |
| c. | Radiotherapy              | <input type="checkbox"/> <b>Yes</b><br><input type="checkbox"/> <b>No</b> | Day (optional), month, year<br><div style="border: 1px solid black; padding: 2px; display: flex; justify-content: space-around;"> <span>D</span><span>D</span><span>M</span><span>M</span><span>Y</span><span>Y</span><span>Y</span><span>Y</span> </div> |
| d. | Other<br>Please specify:  | <input type="checkbox"/> <b>Yes</b><br><input type="checkbox"/> <b>No</b> | Day (optional), month, year<br><div style="border: 1px solid black; padding: 2px; display: flex; justify-content: space-around;"> <span>D</span><span>D</span><span>M</span><span>M</span><span>Y</span><span>Y</span><span>Y</span><span>Y</span> </div> |
| e. | Treatment not started yet | <input type="checkbox"/> <b>Yes</b>                                       |                                                                                                                                                                                                                                                           |

1  
2  
3  
4  
5  
6  
7  
8  
9

### 11. Who is the consultant doctor who has taken responsibility for diagnosing and or/treating your cancer?

10  
11  
12  
13  
14  
15  
16  
17  
18  
19

Name of consultant:

Hospital name:

Hospital department:

20  
21  
22

### Please can you answer some more general questions about your health?

23  
24  
25  
26  
27

It will help us in interpreting your responses to this questionnaire to know about your general health and other health problems you may have had in the past.

28  
29  
30  
31

### 12. Looking back to the 2 years before you were diagnosed with cancer, would you say your general health was (Please tick only **ONE** answer.):



|           |  |
|-----------|--|
| Very good |  |
| Good      |  |
| Fair      |  |
| Poor      |  |
| Very poor |  |

32  
33  
34  
35  
36  
37  
38  
39  
40  
41  
42  
43  
44

### 13. Have you been treated before for any of the conditions below?

45  
46  
47

Please tick 'yes' or 'no' for each condition:

|                                      |                                                          |
|--------------------------------------|----------------------------------------------------------|
| Heart disease                        | <input type="checkbox"/> Yes <input type="checkbox"/> No |
| Stroke                               | <input type="checkbox"/> Yes <input type="checkbox"/> No |
| Lung disease (excluding lung cancer) | <input type="checkbox"/> Yes <input type="checkbox"/> No |
| Diabetes                             | <input type="checkbox"/> Yes <input type="checkbox"/> No |

**Finally, a little more information about you.** The information you provide below will help us to analyse the results of the survey in more detail.

**14. Which of these best describes your ethnic group? (please tick one box, as appropriate).** If you are descended from more than one ethnic or racial group, please tick the group you consider you belong to, or tick 'any other ethnic group'.

|                                         |                                     |         |                                     |                   |                                     |                 |                                     |
|-----------------------------------------|-------------------------------------|---------|-------------------------------------|-------------------|-------------------------------------|-----------------|-------------------------------------|
| White                                   | <input checked="" type="checkbox"/> | Chinese | <input checked="" type="checkbox"/> | Black - Caribbean | <input checked="" type="checkbox"/> | Black - African | <input checked="" type="checkbox"/> |
| Black - other                           | <input type="checkbox"/>            | Indian  | <input type="checkbox"/>            | Pakistani         | <input type="checkbox"/>            | Bangladeshi     | <input type="checkbox"/>            |
| Any other ethnic group, please specify: |                                     |         |                                     |                   |                                     |                 | <input type="checkbox"/>            |

**15. What is the main language spoken in your home?** Please tick

|                        |                                     |
|------------------------|-------------------------------------|
| English                | <input checked="" type="checkbox"/> |
| Other, please specify: | <input type="checkbox"/>            |

**16. What is the highest level of education you have achieved?**

Please tick only **ONE** answer.

|                                                      |                          |
|------------------------------------------------------|--------------------------|
| Finished school at or before the age of fifteen      | <input type="checkbox"/> |
| Completed GCSEs, O-levels or equivalent              | <input type="checkbox"/> |
| Completed A Levels or equivalent                     | <input type="checkbox"/> |
| Completed further education but not a degree         | <input type="checkbox"/> |
| Completed a Bachelor's degree / Masters degree / PhD | <input type="checkbox"/> |
| Other, please specify:                               | <input type="checkbox"/> |

1  
2  
3  
4  
5  
6 **17. Have you ever smoked cigarettes, including hand-rolled ones,**  
7 **pipes or cigars?**

8  
9  Yes  No

10  
11  
12  
13  
14 **18. Are you a current smoker, smoking either cigarettes,**  
15 **including hand-rolled ones, pipes or cigars?**

16  
17  
18  Yes  No

19  
20  
21  
22 **19. If you are a current smoker or have smoked in the past, how many**  
23 **cigarettes, including hand-rolled ones, pipes or cigars on average do you**  
24 **smoke/have you smoked per day?**

25  
26  
27  
28 Number per day:

29  
30  
31  
32  
33  
34  
35  
36  
37  
38  
39  
40  
41  
42  
43  
44  
45  
46  
47  
48  
49  
50  
51  
52  
53  
54  
55  
56  
57  
58  
59  
60

For peer review only

## 20. Further comments

Please add anything else that you would like to tell us about your cancer diagnosis or treatment.

For peer review only

Sample

**Thank you very much for taking the time to complete this questionnaire.**



# International Cancer Benchmarking Partnership Module 4

## Primary Care Audit Lung Cancer

Thank you very much for agreeing to fill in this questionnaire. As part of an international study examining differences in cancer survival, we are sending the questionnaire to health care providers of a sample of consented patients with cancer.

Our aim is to gain a better understanding of the process by which people have their cancer diagnosed – the symptoms they experience, and the pathway they follow from onset of symptoms to treatment of their cancer. This will help in identifying ways in which cancers can be diagnosed and treated quickly and effectively. Thank you once again for your time.

**Please can you refer to your patient's notes in completing the questionnaire as this will help in obtaining accurate data on time points.**

---

If you would prefer to return this questionnaire without the patient details, please tear off along the dotted line

ID-number: Jurisdiction-ID + Patient-ID:

---

1  
2  
3  
4  
5  
6  
7  
8  
9  
10  
11  
12  
13  
14  
15  
16  
17  
18  
19  
20  
21  
22  
23  
24  
25  
26  
27  
28  
29  
30  
31  
32  
33  
34  
35  
36  
37  
38  
39  
40  
41  
42  
43  
44  
45  
46  
47  
48  
49  
50  
51  
52  
53  
54  
55  
56  
57  
58  
59  
60

For peer review only

# Sample

**Patient information**

ID-number: Jurisdiction-ID + Patient-ID:

---

Full name:

---

Address:

---



---

Postcode:

---

Date of birth:

|   |   |   |   |   |   |   |   |
|---|---|---|---|---|---|---|---|
| D | D | M | M | Y | Y | Y | Y |
|---|---|---|---|---|---|---|---|

## 1. Duration of symptoms

Please estimate how long your patient had symptom(s), attributable to lung cancer, before attending your practice (or other health service).

We appreciate that identifying a 'date of first symptom' is not always straightforward – particularly when there are multiple and/or chronic symptoms. Nevertheless, we hope you can provide a 'best estimate'.

| <b>Estimate of symptom duration</b><br>(please tick <b>one</b> ): |  | <b>What were the symptoms?</b><br>Please describe: |
|-------------------------------------------------------------------|--|----------------------------------------------------|
| Less than 1 week                                                  |  |                                                    |
| 1 to 4 weeks                                                      |  |                                                    |
| 5 to 7 weeks                                                      |  |                                                    |
| 2-5 months                                                        |  |                                                    |
| 6-12 months                                                       |  |                                                    |
| More than 12 months                                               |  |                                                    |
| Not possible to estimate                                          |  |                                                    |
| No symptoms<br>(e.g. screen detected cancers)                     |  |                                                    |

**2. Pathway of presentation**

**2.1 Through what route did the patient first present? Please tick ONE:**



|                                                                                                                                                       |   |                                                                                                                                                                                                                                                            |   |   |   |   |   |   |   |   |
|-------------------------------------------------------------------------------------------------------------------------------------------------------|---|------------------------------------------------------------------------------------------------------------------------------------------------------------------------------------------------------------------------------------------------------------|---|---|---|---|---|---|---|---|
| <p>Your patient first presented to primary care (either in-hours or out-of-hours)</p>                                                                 |   | <p>Please can you provide your best approximation of the date of this <b>primary care</b> visit</p> <table border="1" data-bbox="756 638 1449 725"> <tr> <td>D</td><td>D</td><td>M</td><td>M</td><td>Y</td><td>Y</td><td>Y</td><td>Y</td> </tr> </table>   | D | D | M | M | Y | Y | Y | Y |
| D                                                                                                                                                     | D | M                                                                                                                                                                                                                                                          | M | Y | Y | Y | Y |   |   |   |
| <p>Your patient presented straight to A&amp;E (with or without your involvement)</p>                                                                  |   |                                                                                                                                                                                                                                                            |   |   |   |   |   |   |   |   |
| <p>Your patient first presented to primary care, but then at a later date presented to A&amp;E as an emergency (with or without your involvement)</p> |   | <p>Please can you provide your best approximation of the date of this <b>primary care</b> visit</p> <table border="1" data-bbox="756 1301 1449 1388"> <tr> <td>D</td><td>D</td><td>M</td><td>M</td><td>Y</td><td>Y</td><td>Y</td><td>Y</td> </tr> </table> | D | D | M | M | Y | Y | Y | Y |
| D                                                                                                                                                     | D | M                                                                                                                                                                                                                                                          | M | Y | Y | Y | Y |   |   |   |
| <p>Other – please describe:</p>                                                                                                                       |   |                                                                                                                                                                                                                                                            |   |   |   |   |   |   |   |   |

### 3. Date you ordered any tests/investigations in response to symptom(s).

We are interested in any kind of tests/investigations (e.g. imaging etc) that you may have ordered. Please only consider the tests/investigations that you ordered yourself. Please tick **all** that apply and put in the date that the test/investigation was ordered:

✓

|                         |  |                                                                                                                                                                                                                         |
|-------------------------|--|-------------------------------------------------------------------------------------------------------------------------------------------------------------------------------------------------------------------------|
| Chest x-ray             |  | <input type="checkbox"/> D <input type="checkbox"/> D <input type="checkbox"/> M <input type="checkbox"/> M <input type="checkbox"/> Y <input type="checkbox"/> Y <input type="checkbox"/> Y <input type="checkbox"/> Y |
| MRI scan                |  | <input type="checkbox"/> D <input type="checkbox"/> D <input type="checkbox"/> M <input type="checkbox"/> M <input type="checkbox"/> Y <input type="checkbox"/> Y <input type="checkbox"/> Y <input type="checkbox"/> Y |
| CT scan                 |  | <input type="checkbox"/> D <input type="checkbox"/> D <input type="checkbox"/> M <input type="checkbox"/> M <input type="checkbox"/> Y <input type="checkbox"/> Y <input type="checkbox"/> Y <input type="checkbox"/> Y |
| PET scan                |  | <input type="checkbox"/> D <input type="checkbox"/> D <input type="checkbox"/> M <input type="checkbox"/> M <input type="checkbox"/> Y <input type="checkbox"/> Y <input type="checkbox"/> Y <input type="checkbox"/> Y |
| Sputum test             |  | <input type="checkbox"/> D <input type="checkbox"/> D <input type="checkbox"/> M <input type="checkbox"/> M <input type="checkbox"/> Y <input type="checkbox"/> Y <input type="checkbox"/> Y <input type="checkbox"/> Y |
| Lung biopsy             |  | <input type="checkbox"/> D <input type="checkbox"/> D <input type="checkbox"/> M <input type="checkbox"/> M <input type="checkbox"/> Y <input type="checkbox"/> Y <input type="checkbox"/> Y <input type="checkbox"/> Y |
| Bronchoscopy            |  | <input type="checkbox"/> D <input type="checkbox"/> D <input type="checkbox"/> M <input type="checkbox"/> M <input type="checkbox"/> Y <input type="checkbox"/> Y <input type="checkbox"/> Y <input type="checkbox"/> Y |
| Other (please specify): |  | <input type="checkbox"/> D <input type="checkbox"/> D <input type="checkbox"/> M <input type="checkbox"/> M <input type="checkbox"/> Y <input type="checkbox"/> Y <input type="checkbox"/> Y <input type="checkbox"/> Y |

### 4. Date of referral to specialist medical services

At what date did you **first** refer the patient to hospital or another specialist transferring the responsibility for on-going investigation/treatment to other medical services?

|                            |                            |                            |                            |                            |                            |                            |                            |
|----------------------------|----------------------------|----------------------------|----------------------------|----------------------------|----------------------------|----------------------------|----------------------------|
| <input type="checkbox"/> D | <input type="checkbox"/> D | <input type="checkbox"/> M | <input type="checkbox"/> M | <input type="checkbox"/> Y | <input type="checkbox"/> Y | <input type="checkbox"/> Y | <input type="checkbox"/> Y |
|----------------------------|----------------------------|----------------------------|----------------------------|----------------------------|----------------------------|----------------------------|----------------------------|

**5. Nature of this referral**

**5.1 Do you know the date that the patient was seen for this referral?**

**Yes**, please provide the date: 

|   |   |   |   |   |   |   |   |
|---|---|---|---|---|---|---|---|
| D | D | M | M | Y | Y | Y | Y |
|---|---|---|---|---|---|---|---|

**No**

**5.2 If you did make a referral to specialist services, which of the following best describes the nature/characteristics of this referral?** Please tick **one**.

|                                                                                                                              |   |
|------------------------------------------------------------------------------------------------------------------------------|---|
| Emergency admission: a referral to A&E (or equivalent) for immediate admission                                               | ✓ |
| An urgent referral for assessment of cancer symptoms/signs/test results (Note this will be within 2 weeks for England/Wales) |   |
| A less urgent referral in which cancer is raised as a possibility (Note this will be greater than 2 weeks for England/Wales) |   |
| A more general referral for investigation and assessment without cancer mentioned                                            |   |
| No referral was made                                                                                                         |   |
| Other – please describe                                                                                                      |   |

**5.3 Would you say this patient’s diagnostic pathway was conducted predominantly in the public or private system?** Please tick **one**.

|                           |  |
|---------------------------|--|
| Public healthcare system  |  |
| Private healthcare system |  |

## 6. Date of lung cancer diagnosis

This can be decided in different ways. Please tick **all** that apply.

Please provide whichever of the following dates you have to hand:

✓

|                                                                                  |  |                                                                                                                                                                                                                                                         |
|----------------------------------------------------------------------------------|--|---------------------------------------------------------------------------------------------------------------------------------------------------------------------------------------------------------------------------------------------------------|
| Date of histological confirmation [ideal]                                        |  | <input type="text" value="D"/> <input type="text" value="D"/> <input type="text" value="M"/> <input type="text" value="M"/> <input type="text" value="Y"/> <input type="text" value="Y"/> <input type="text" value="Y"/> <input type="text" value="Y"/> |
| Date results of investigation (histological or other) confirming cancer received |  | <input type="text" value="D"/> <input type="text" value="D"/> <input type="text" value="M"/> <input type="text" value="M"/> <input type="text" value="Y"/> <input type="text" value="Y"/> <input type="text" value="Y"/> <input type="text" value="Y"/> |
| Date patient was told                                                            |  | <input type="text" value="D"/> <input type="text" value="D"/> <input type="text" value="M"/> <input type="text" value="M"/> <input type="text" value="Y"/> <input type="text" value="Y"/> <input type="text" value="Y"/> <input type="text" value="Y"/> |
| Date biopsy undertaken                                                           |  | <input type="text" value="D"/> <input type="text" value="D"/> <input type="text" value="M"/> <input type="text" value="M"/> <input type="text" value="Y"/> <input type="text" value="Y"/> <input type="text" value="Y"/> <input type="text" value="Y"/> |
| Date patient was first admitted to hospital because of the malignancy            |  | <input type="text" value="D"/> <input type="text" value="D"/> <input type="text" value="M"/> <input type="text" value="M"/> <input type="text" value="Y"/> <input type="text" value="Y"/> <input type="text" value="Y"/> <input type="text" value="Y"/> |
| Other (please specify)                                                           |  | <input type="text" value="D"/> <input type="text" value="D"/> <input type="text" value="M"/> <input type="text" value="M"/> <input type="text" value="Y"/> <input type="text" value="Y"/> <input type="text" value="Y"/> <input type="text" value="Y"/> |

**7. Additional information**

Finally, we are interested to know what other conditions your patient has, and the severity/impact of these conditions

Have you and/or any of your partners treated this patient (or has the patient been to hospital) for any of the following conditions? Please tick **all** that apply:

|                                   |                                                          |
|-----------------------------------|----------------------------------------------------------|
| Cardiovascular disease            | <input type="checkbox"/> Yes <input type="checkbox"/> No |
| Stroke                            | <input type="checkbox"/> Yes <input type="checkbox"/> No |
| Lung disease (except lung cancer) | <input type="checkbox"/> Yes <input type="checkbox"/> No |
| Diabetes                          | <input type="checkbox"/> Yes <input type="checkbox"/> No |

**Are there any other comments you would like to make about this patient?**

Name (and title):

---

Signature:

---

Date:

---

**Thank you very much for taking the time to complete this questionnaire.**



1  
2  
3  
4  
5  
6  
7  
8  
9  
10  
11  
12  
13  
14  
15  
16  
17  
18  
19  
20  
21  
22  
23  
24  
25  
26  
27  
28  
29  
30  
31  
32  
33  
34  
35  
36  
37  
38  
39  
40  
41  
42  
43  
44  
45  
46  
47  
48  
49  
50  
51  
52  
53  
54  
55  
56  
57  
58  
59  
60

# International Cancer Benchmarking Partnership Module 4

## Specialist Care Audit Lung Cancer

Thank you very much for agreeing to fill in this questionnaire – it should take about 10 minutes to complete. As part of an international study examining differences in cancer survival, we are sending the questionnaire to health care providers of a sample of patients with cancer.

Our aim is to gain a better understanding of the process by which people have their cancer diagnosed – the symptoms they experience, and the pathway they follow from onset of symptoms to treatment of their cancer. We hope you can help us with information on this patient’s cancer journey **once they were referred to specialist cancer services**. This will help in identifying ways in which cancers can be diagnosed and treated quickly and effectively.

### Thank you once again for your time

**Please can you refer to your patient’s notes in completing the questionnaire, as this will help in obtaining accurate data on time points.**



If you would prefer to return this questionnaire without the patient details, please tear off along the dotted line.

Your patient

---

is participating in the study.



1  
2  
3  
4  
5  
6  
7  
8  
9  
10  
11  
12  
13  
14  
15  
16  
17  
18  
19  
20  
21  
22  
23  
24  
25  
26  
27  
28  
29  
30  
31  
32  
33  
34  
35  
36  
37  
38  
39  
40  
41  
42  
43  
44  
45  
46  
47  
48  
49  
50  
51  
52  
53  
54  
55  
56  
57  
58  
59  
60

# Sample

.....

## Patient information

ID-number: Jurisdiction-ID + Patient-ID:

Full name:

Address:

Postcode:

Date of birth:

|   |   |   |   |   |   |   |   |
|---|---|---|---|---|---|---|---|
| D | D | M | M | Y | Y | Y | Y |
|---|---|---|---|---|---|---|---|

Copyright property of the International Benchmarking Partnership (ICBP) and Module 4 collaborators. Usage must be authorised

- 1  
2  
3  
4  
5 **1. Date patient first attended hospital/specialist services related to their cancer diagnosis.** We appreciate this date can at times be difficult to identify, particularly  
6 when there have been multiple visits in the lead up to a definitive diagnosis. Put  
7 another way, it's the date that the hospital/specialist service **assumed responsibility**  
8 **for on-going investigation/treatment** for your patient.  
9  
10  
11  
12

13 Day (optional), month, year

|   |   |   |   |   |   |   |   |
|---|---|---|---|---|---|---|---|
| D | D | M | M | Y | Y | Y | Y |
|---|---|---|---|---|---|---|---|

- 14  
15  
16  
17  
18  
19 **2. How was the patient referred to the hospital/specialist services related to their cancer diagnosis?** Please tick.  
20  
21  
22

23 Was it through a:

|                                        |                                     |                                  |                                     |
|----------------------------------------|-------------------------------------|----------------------------------|-------------------------------------|
| GP referral                            | <input checked="" type="checkbox"/> | Referral from respiratory clinic | <input checked="" type="checkbox"/> |
| Medical specialist/Consultant referral | <input type="checkbox"/>            | Other referral – please specify: | <input type="checkbox"/>            |

- 24  
25  
26  
27  
28  
29  
30  
31  
32  
33  
34 **3. Where did this first contact/appointment happen?** Please tick.  
35

36 Which of the following best describes where this first contact/appointment took place?  
37  
38  
39

|                                        |                                     |                                                                 |                                     |
|----------------------------------------|-------------------------------------|-----------------------------------------------------------------|-------------------------------------|
| Emergency department ('A&E')           | <input checked="" type="checkbox"/> | Medical outpatient department, please specify which department  | <input checked="" type="checkbox"/> |
| Oncology general outpatient department | <input type="checkbox"/>            | Surgical outpatient department, please specify which department | <input type="checkbox"/>            |
| Other – please specify:                |                                     |                                                                 | <input type="checkbox"/>            |

**4. Date of diagnosis**

This can be decided in different ways.

Please tick and complete as many of the following dates as possible.



|                                                                       |  |                                                |
|-----------------------------------------------------------------------|--|------------------------------------------------|
| Date of histological confirmation (ideal)                             |  | Day (optional), month, year<br>D D M M Y Y Y Y |
| Date results of investigation confirming cancer received              |  | Day (optional), month, year<br>D D M M Y Y Y Y |
| Date patient was told                                                 |  | Day (optional), month, year<br>D D M M Y Y Y Y |
| Date of biopsy                                                        |  | Day (optional), month, year<br>D D M M Y Y Y Y |
| Date patient was first admitted to hospital because of the malignancy |  | Day (optional), month, year<br>D D M M Y Y Y Y |
| Date of MDT confirmation of diagnosis                                 |  | Day (optional), month, year<br>D D M M Y Y Y Y |
| Other (please specify):                                               |  | Day (optional), month, year<br>D D M M Y Y Y Y |

## 5. Date treatment for the cancer commenced

Based on your records, when would you say that any treatment specifically targeting the patient's cancer started?

Day (optional), month, year

|   |   |   |   |   |   |   |   |
|---|---|---|---|---|---|---|---|
| D | D | M | M | Y | Y | Y | Y |
|---|---|---|---|---|---|---|---|

## 6. Additional information

Please can you provide any further information on the patient's cancer:

| TNM, please tick as appropriate: |                          |
|----------------------------------|--------------------------|
| 0                                | <input type="checkbox"/> |
| I                                | <input type="checkbox"/> |
| IIA                              | <input type="checkbox"/> |
| IIB                              | <input type="checkbox"/> |
| IIC                              | <input type="checkbox"/> |
| IIIA                             | <input type="checkbox"/> |
| IIIB                             | <input type="checkbox"/> |
| IIIC                             | <input type="checkbox"/> |
| IV                               | <input type="checkbox"/> |
| Not able to stage                | <input type="checkbox"/> |

## 6.1 Histological subtype:



|                         |  |
|-------------------------|--|
| Squamous cell carcinoma |  |
| Adenocarcinoma          |  |
| Large cell carcinoma    |  |
| Non-small carcinoma     |  |
| Small cell carcinoma    |  |
| Carcinoid               |  |
| Unclassified            |  |
| Other (please specify): |  |

Sample



1  
2  
3  
4  
5  
6  
7  
8  
9  
10  
11  
12  
13  
14  
15  
16  
17  
18  
19  
20  
21  
22  
23  
24  
25  
26  
27  
28  
29  
30  
31  
32  
33  
34  
35  
36  
37  
38  
39  
40  
41  
42  
43  
44  
45  
46  
47  
48  
49  
50  
51  
52  
53  
54  
55  
56  
57  
58  
59  
60

### Further comments





1  
2  
3  
4  
5  
6  
7  
8  
9  
10  
11  
12  
13  
14  
15  
16  
17  
18  
19  
20  
21  
22  
23  
24  
25  
26  
27  
28  
29  
30  
31  
32  
33  
34  
35  
36  
37  
38  
39  
40  
41  
42  
43  
44  
45  
46  
47  
48  
49  
50  
51  
52  
53  
54  
55  
56  
57  
58  
59  
60

Name (and title):

---

Signature:

---

Date:

---

Are you a ... (please tick below):

Sample



|                           |                                     |
|---------------------------|-------------------------------------|
| Surgeon                   | <input checked="" type="checkbox"/> |
| Medical Oncologist        | <input type="checkbox"/>            |
| Clinical Oncologist       | <input type="checkbox"/>            |
| Clinical Nurse Specialist | <input type="checkbox"/>            |
| Other (please specify):   | <input type="checkbox"/>            |

**Thank you very much for taking the time to complete this questionnaire.**

## Supplementary File 4: Rules for missing, incomplete, multiple response and out of range data and for calculating intervals

|    |                                                                                                                                                                                    |
|----|------------------------------------------------------------------------------------------------------------------------------------------------------------------------------------|
| 1  | 1. <u>Oversampling/Participation in local screening trials</u>                                                                                                                     |
| 2  | a) To handle oversampling in Ontario, include only the first 315 consecutive lung cancer patients;                                                                                 |
| 3  | b) In jurisdictions with no national screen program: exclude patients participated in local screen trials.                                                                         |
| 4  | 2. <u>Language/Participation in study/Presence of cancer</u>                                                                                                                       |
| 5  | Exclude patients who checked “No, I don’t understand the language” or “I don’t want to participate in this study” or “I don’t have cancer”.                                        |
| 6  | 3. <u>Survey responders</u>                                                                                                                                                        |
| 7  | a) Exclude Patient/PCP/Specialist survey from the analysis, if it was not written by Patient/PCP/Specialist (example: a medical oncologist completed a PCP survey);                |
| 8  | b) In the case of duplicates, include only the first survey (example: 2 specialists completed surveys for the same patient).                                                       |
| 9  | 4. <u>Gender</u>                                                                                                                                                                   |
| 10 | Exclude patients with unknown Gender.                                                                                                                                              |
| 11 | 5. <u>Age</u>                                                                                                                                                                      |
| 12 | a) Exclude patients with unknown age;                                                                                                                                              |
| 13 | b) Exclude patients younger 40 years;                                                                                                                                              |
| 14 | c) Use registry data, if Age is reported by both patient and registry.                                                                                                             |
| 15 | 6. <u>No cancer or Previous cancer in the same organ</u>                                                                                                                           |
| 16 | a) Exclude patients with no cancer based on registry data;                                                                                                                         |
| 17 | b) Exclude patients with previous cancer in the same organ based on data from registry or free-text for Presentation in the patient survey.                                        |
| 18 | 7. <u>Date of consent</u>                                                                                                                                                          |
| 19 | Exclude patients with date of consent which is unknown, before 01.01.2013 or in the future.                                                                                        |
| 20 | 8. <u>Multiple responses to Dates</u>                                                                                                                                              |
| 21 | If multiple responses were given to the dates (of first symptom; screening; first presentation to primary care; referral; diagnosis; treatment start), then use the earliest date. |
| 22 | 9. <u>Order of Dates</u>                                                                                                                                                           |
| 23 | The dates must be in the following order –                                                                                                                                         |
| 24 | a) First symptom; first presentation to Primary Care; referral; diagnosis; treatment start.                                                                                        |
| 25 | b) Screening; diagnosis; treatment start.                                                                                                                                          |
| 26 | If not, check for mistakes.                                                                                                                                                        |
| 27 | 10. <u>Date of first symptom</u>                                                                                                                                                   |
| 28 | Date of first symptom is defined as date of first symptom from patient data.                                                                                                       |
| 29 | 11. <u>Date of first presentation</u>                                                                                                                                              |
| 30 | Date of first presentation to Primary Care is defined as (in the order of declining priority):                                                                                     |
| 31 | a) date of first presentation to Primary Care from PCP data;                                                                                                                       |
| 32 | b) date of first presentation to Primary Care and A&E from PCP data;                                                                                                               |

|    |                                                                                               |
|----|-----------------------------------------------------------------------------------------------|
| 1  |                                                                                               |
| 2  |                                                                                               |
| 3  | c) date of first presentation to Primary Care from patient data.                              |
| 4  |                                                                                               |
| 5  | 12. <u>Date of referral</u>                                                                   |
| 6  | Date of referral is defined as date of referral from PCP data.                                |
| 7  |                                                                                               |
| 8  | 13. <u>Date of screening</u>                                                                  |
| 9  | Date of screening is defined as (in the order of declining priority):                         |
| 10 |                                                                                               |
| 11 | a) date of screening from registry;                                                           |
| 12 |                                                                                               |
| 13 | b) date of screening from patient data                                                        |
| 14 |                                                                                               |
| 15 | 14. <u>Date of diagnosis</u>                                                                  |
| 16 | <i>Definition</i>                                                                             |
| 17 | a) If Registry reports both date of histological confirmation and date of confirming          |
| 18 | investigation, then use date of histological confirmation.                                    |
| 19 | b) Date of diagnosis (based on patient data, PCP data, specialist data, registry data) is     |
| 20 | defined as (in the order of declining priority):                                              |
| 21 | - date of diagnosis from registry;                                                            |
| 22 | - date of histological confirmation (from specialist data, PCP data);                         |
| 23 | - date of biopsy (from specialist data, PCP data);                                            |
| 24 | - date of confirming investigation (from specialist data, PCP data);                          |
| 25 | - date of first hospital admission (from specialist data, PCP data);                          |
| 26 | - date of MDT confirmation (from specialist data, PCP data);                                  |
| 27 | - date patient was told (from specialist data, PCP data);                                     |
| 28 | - other date of diagnosis (from specialist data, PCP data, patient data);                     |
| 29 |                                                                                               |
| 30 |                                                                                               |
| 31 | Choose a Date from a lower level of hierarchy, if the Date from a higher level is after the   |
| 32 | Date of consent or more than 9 months (=271 days) before the Date of consent.                 |
| 33 |                                                                                               |
| 34 | <i>Exclusion criteria</i>                                                                     |
| 35 |                                                                                               |
| 36 | a) Unknown date of diagnosis;                                                                 |
| 37 | b) Date of diagnosis is after the date of consent;                                            |
| 38 | c) Date of diagnosis is more than 9 months before the Date of consent.                        |
| 39 |                                                                                               |
| 40 | 15. <u>Date of treatment start</u>                                                            |
| 41 | a) Date of treatment start from patient data is defined as the earliest of the treatment      |
| 42 | dates for Surgery, Chemo, Radio and Other;                                                    |
| 43 | b) Date of treatment start (based on registry data, specialist data, patient data) is defined |
| 44 | as (in the order of declining priority):                                                      |
| 45 | - date of treatment start from registry data,                                                 |
| 46 | - date of treatment start from specialist data,                                               |
| 47 | - date of treatment start from patient data,                                                  |
| 48 | - anticipated date of treatment from patient data.                                            |
| 49 |                                                                                               |
| 50 | 16. <u>Imputation of missing day in the date</u>                                              |
| 51 | Imputation rules for missing day (given month and year are known):                            |
| 52 |                                                                                               |
| 53 | a) Set missing day to '16';                                                                   |
| 54 | b) Consider adjacent dates in a backwards order (from "Treatment" to "First symptom").        |
| 55 | For each pair of such adjacent dates: If dates are not in a logical order (e.g.               |
| 56 |                                                                                               |
| 57 |                                                                                               |
| 58 |                                                                                               |
| 59 |                                                                                               |
| 60 |                                                                                               |

|    |                                                                                                |
|----|------------------------------------------------------------------------------------------------|
| 1  |                                                                                                |
| 2  |                                                                                                |
| 3  | “Treatment” is before “Diagnosis”), but month and year are the same in both dates,             |
| 4  | and the day was imputed to ‘16’ in one of the dates:                                           |
| 5  | - Recode the day imputed earlier to ‘16’ to the day from the adjacent date                     |
| 6  |                                                                                                |
| 7  | <b>17. <u>Considering time</u></b>                                                             |
| 8  | If patient gave multiple answers to the “How long did you have symptoms before contacting      |
| 9  | a doctor?” question, then use the option with the shortest time interval.                      |
| 10 |                                                                                                |
| 11 | <b>18. <u>Delay arranging appointment</u></b>                                                  |
| 12 | If patient gave multiple answers to the “How long did it take to get an appointment with       |
| 13 | PCP?” question, then use the option with the shortest time interval.                           |
| 14 |                                                                                                |
| 15 | <b>19. <u>Duration of symptoms</u></b>                                                         |
| 16 | If PCP gave multiple answers to the “Duration of symptoms” question, then use the option       |
| 17 | with the shortest time interval.                                                               |
| 18 |                                                                                                |
| 19 | <b>20. <u>Definition of Routes to diagnosis</u></b>                                            |
| 20 | <b>A. <i>Define Route within a Data Source</i></b>                                             |
| 21 | 1. Review the free-text for Route (Patient, PCP sources) and re-code, if possible.             |
| 22 | 2. If PCP reports ‘Other’ as Route and at least one symptom (or “Duration of                   |
| 23 | Symptoms”) or if Patient reports ‘Other’ as Route and at least one symptom (or date            |
| 24 | of first symptom or “Consider waiting time” or “Delay arranging appointment”), then            |
| 25 | re-code the Route in the corresponding data source to ‘Other non-screen-detected’-             |
| 26 | option.                                                                                        |
| 27 | 3. In the case of multiple Routes responses (Patient, PCP sources) - use a single              |
| 28 | option (in the order of declining priority):                                                   |
| 29 |                                                                                                |
| 30 | a) ‘VisitPCP and AE’,                                                                          |
| 31 | b) ‘VisitPCP’, ‘AE’ (if both ‘VisitPCP’ and ‘AE’ are given, then re-code as ‘VisitPCP          |
| 32 | and AE’),                                                                                      |
| 33 | c) ‘Other non-screen-detected’,                                                                |
| 34 | d) ‘Investigation for another problem’,                                                        |
| 35 | e) ‘Other’                                                                                     |
| 36 |                                                                                                |
| 37 |                                                                                                |
| 38 | <b>B. <i>Define Route from Alternative Data</i></b>                                            |
| 39 |                                                                                                |
| 40 | If Route hasn’t been reported in either of data sources, then define it ‘Other non-screen-     |
| 41 | detected’, if PCP reports at least one symptom (or “Duration of symptoms”); or if Patient      |
| 42 | reports at least one symptom (or date of first symptom or “Consider waiting time” or “Delay    |
| 43 | arranging appointment”);                                                                       |
| 44 |                                                                                                |
| 45 | <b>C. <i>Define Route from Data Source Hierarchy</i></b>                                       |
| 46 | 1. In all jurisdictions, except Sweden – use Route data from (in the order of declining        |
| 47 | priority):                                                                                     |
| 48 | a) PCP data;                                                                                   |
| 49 | b) Patient data;                                                                               |
| 50 | 2. In Sweden – use Route data from Patient data.                                               |
| 51 |                                                                                                |
| 52 | <b>21. <u>Patient interval</u></b>                                                             |
| 53 | The Patient interval for non-screen-detected patients is defined as (in the order of declining |
| 54 | priority):                                                                                     |
| 55 | a) “Date of first presentation to Primary Care” (rule 11) minus “Date of first symptom” (rule  |
| 56 | 10);                                                                                           |
| 57 |                                                                                                |
| 58 |                                                                                                |
| 59 |                                                                                                |
| 60 |                                                                                                |

|    |                                                                                                |
|----|------------------------------------------------------------------------------------------------|
| 1  |                                                                                                |
| 2  |                                                                                                |
| 3  | b) If the interval in (a) is unknown or negative: Calculate the interval as the low boundary   |
| 4  | of “Considering time” (rule 17) plus the low boundary of “Delay arranging appointment”         |
| 5  | (rule 18);                                                                                     |
| 6  | c) If the interval in (a) is unknown or negative and the interval in (b) is unknown: Calculate |
| 7  | the interval as the low boundary of “Duration of symptoms interval” (rule 19).                 |
| 8  |                                                                                                |
| 9  | <b>22. <u>Primary Care interval</u></b>                                                        |
| 10 | The Primary Care interval for non-screen-detected is defined as “Date of referral” (rule 12)   |
| 11 | minus “Date of first presentation to Primary Care” (rule 11).                                  |
| 12 |                                                                                                |
| 13 | <b>23. <u>Diagnostic interval</u></b>                                                          |
| 14 | a) The Diagnostic interval for non-screen-detected is defined as “Date of diagnosis” (rule     |
| 15 | 14) minus “Date of first presentation to Primary Care” (rule 11);                              |
| 16 | b) The Diagnostic interval for screen-detected patients is defined as “Date of diagnosis”      |
| 17 | (rule 14) minus “Date of screening” (rule 13).                                                 |
| 18 |                                                                                                |
| 19 | <b>24. <u>Treatment interval</u></b>                                                           |
| 20 | The Treatment interval is defined as “Date of treatment start” (rule 15) minus “Date of        |
| 21 | diagnosis” (rule 14).                                                                          |
| 22 |                                                                                                |
| 23 | <b>25. <u>Total interval</u></b>                                                               |
| 24 | a) The Total interval for non-screen-detected patients is defined as “Date of treatment        |
| 25 | start” (rule 15) minus “Date of first symptom” (rule 10);                                      |
| 26 | b) The Total interval for screen-detected patients is defined as “Date of treatment start”     |
| 27 | (rule 15) minus “Date of screening” (rule 13).                                                 |
| 28 |                                                                                                |
| 29 | <b>26. <u>Range of Time intervals</u></b>                                                      |
| 30 | The time intervals (Patient, Primary Care, Diagnosis, Treatment, Total) must be in range 0-    |
| 31 | 1 year.                                                                                        |
| 32 | If > 1 year: set the interval to 365 days                                                      |
| 33 | If negative: set the interval to 0.                                                            |
| 34 |                                                                                                |
| 35 | For each jurisdiction calculate the number of imputations due to:                              |
| 36 |                                                                                                |
| 37 | a) unknown day in a date (given known month and year);                                         |
| 38 | b) very large(>1 year) interval;                                                               |
| 39 | c) negative interval.                                                                          |
| 40 |                                                                                                |
| 41 | <b>27. <u>Number of visits</u></b>                                                             |
| 42 | If patient gave multiple answers to the “Number of visits” questions, then use the option      |
| 43 | with a fewer number of visits.                                                                 |
| 44 |                                                                                                |
| 45 | <b>28. <u>Specialist waiting time interval</u></b>                                             |
| 46 | If patient gave multiple answers to the “How long did it take to get an appointment with       |
| 47 | specialist?” question, then use the option with the shortest time interval.                    |
| 48 |                                                                                                |
| 49 | <b>29. <u>Type of treatment</u></b>                                                            |
| 50 | If patient ticked both “Yes” and “No” as answers to the “Type of treatment (Surgery,           |
| 51 | Chemotherapy, Radiotherapy)” questions, then choose “Yes” answer.                              |
| 52 |                                                                                                |
| 53 |                                                                                                |
| 54 |                                                                                                |
| 55 |                                                                                                |
| 56 |                                                                                                |
| 57 |                                                                                                |
| 58 |                                                                                                |
| 59 |                                                                                                |
| 60 |                                                                                                |

|    |                                                                                                   |
|----|---------------------------------------------------------------------------------------------------|
| 1  |                                                                                                   |
| 2  |                                                                                                   |
| 3  | 30. <u>Health state</u>                                                                           |
| 4  | If patient gave multiple answers to the “Health state” question, then use the option with a       |
| 5  | better health condition.                                                                          |
| 6  |                                                                                                   |
| 7  | 31. <u>Comorbidity</u>                                                                            |
| 8  | a) If patient ticked both “Yes” and “No” as answers to the “Comorbidity (Heart disease,           |
| 9  | Stroke, Lung disease, Diabetes)” questions, then choose “Yes” answer;                             |
| 10 | b) If both patient and PCP report “Comorbidity”, then use the PCP Data.                           |
| 11 |                                                                                                   |
| 12 | 32. <u>Ethnicity</u>                                                                              |
| 13 | a) If patient didn’t report “Ethnicity”, then use the information from (in the order of declining |
| 14 | priority):                                                                                        |
| 15 | - “Ethnicity_Other_Details”;                                                                      |
| 16 | - “Other main language spoken at home”;                                                           |
| 17 | - “The main language spoken at home” (only for Victoria);                                         |
| 18 | - “The main language spoken at home is the chief one for this jurisdiction”=“Yes”                 |
| 19 | given                                                                                             |
| 20 | “Main language spoken at home is other than the main one for this                                 |
| 21 | jurisdiction”=“No”;                                                                               |
| 22 | b) Consider Ethnicity as unknown, if answers to the “Ethnicity” question are multiple and         |
| 23 | belong to different categories ( ‘white’, ‘Asian’, ‘black’, ‘other’).                             |
| 24 |                                                                                                   |
| 25 | 33. <u>Education</u>                                                                              |
| 26 | If patient gave multiple answers to the “Education” question, then use the option with a          |
| 27 | higher level of education.                                                                        |
| 28 |                                                                                                   |
| 29 | 34. <u>Smoking Current</u>                                                                        |
| 30 | a) If patient ticked both “Yes” and “No” as answers to the “Smoking Current” question,            |
| 31 | then use “Yes” answer;                                                                            |
| 32 | b) If patient hasn’t ticked neither “Yes” nor “No”, then consider this case as Unknown.           |
| 33 |                                                                                                   |
| 34 | 35. <u>Smoking Number</u>                                                                         |
| 35 | If patient reports “SmokingNumber” as text, then re-code using following rules:                   |
| 36 | a) Where there is a number smoked /day – accept number;                                           |
| 37 | b) Where a range has been given – take the upper value;                                           |
| 38 | c) Where patient has put 10+ or 20+ - capture this as 11 or 21;                                   |
| 39 | d) Where number of cigarettes smoked in the past and currently being smoked are                   |
| 40 | provided - average the numbers;                                                                   |
| 41 | e) Non entries code as “.” ;                                                                      |
| 42 | f) Non-smokers (eg, “nil”, “N/A”) are coded as “0”.                                               |
| 43 |                                                                                                   |
| 44 |                                                                                                   |
| 45 |                                                                                                   |
| 46 | 36. <u>Smoked ever</u>                                                                            |
| 47 | a) If patient ticked both “Yes” and “No” as answers to the “Smoking ever” question, then          |
| 48 | use “Yes” answer;                                                                                 |
| 49 | b) If patient hasn’t ticked neither “Yes” nor “No”: consider it as “Yes”, if patient is a current |
| 50 | smoker (“Smoking_Current=“Yes””) or has specified a number of cigarettes                          |
| 51 | (“SmokingNumber”>0). Otherwise consider this case as Unknown.                                     |
| 52 | c) If patient has ticked “No”: recode it to “Yes”, if patient is a current smoker                 |
| 53 | (“Smoking_Current=“Yes””).                                                                        |
| 54 |                                                                                                   |
| 55 |                                                                                                   |
| 56 |                                                                                                   |
| 57 |                                                                                                   |
| 58 |                                                                                                   |
| 59 |                                                                                                   |
| 60 |                                                                                                   |

37. Nature of referral

- a) Review free-text for “Nature of referral” (PCP Data) and re-code, if possible;  
 b) In the case of multiple responses, use a single option as (in the order of declining priority):

- “Referral for immediate admission”;
- “Urgent referral”;
- “Less urgent referral”;
- “General referral” ;
- “No referral”;
- “Other”.

38. Refer Public or Private

- a) If PCP ticked both “Public” and “Private” as answers to the “Refer Public or Private” question, then use “Private” answer;  
 b) If PCP hasn’t ticked neither “Public” nor “Private”, then consider this case as Unknown.

39. Type of referral

If specialist gave multiple responses to the “How was the patient referred...” question, then use a single option (in the order of declining priority):

- “Screening”;
- “Respiratory clinic”;
- “General surgery clinic”;
- “General gynaecology”;
- “Specialist/consultant”;
- “PCP”;
- “Other”.

40. First Attendance Place

If specialist gave multiple responses to the “First Attendance Place” question, then consider this case as Unknown.

41. Stage-TNM

- a) If specialist gave multiple responses to the “Stage\_TNM” question, then use the highest category;  
 b) If registry gave multiple responses to the “Stage\_TNM”, then use a single option (in the order of declining priority):
- stage at time of diagnosis
  - stage at surgery
  - stage at oncology
- c) If “Stage\_TNM” is reported by both the specialist and registry, then use the registry data.

## Supplementary File 5 - Tables

**Table 1:** Classification of symptoms reported by patients into cancer specific and non-cancer specific

### Cancer specific symptoms

|                                               |
|-----------------------------------------------|
| 1 persistent cough                            |
| 2 chest infection that wouldn't get better    |
| 3 coughing up blood-stained phlegm (sputum)   |
| 4 breathlessness                              |
| 5 chest or shoulder pain                      |
| 6 a hoarse voice                              |
| 7 difficulty swallowing                       |
| 8 swelling of lymph nodes (glands) in my neck |
| 9 ends of fingers becoming larger             |
| 10 breast and axilla swelling (in men)        |

### Non-cancer specific symptoms

|                                                                  |
|------------------------------------------------------------------|
| 1 a dull ache or sharp pain when I coughed or took a deep breath |
| 2 pain/discomfort under my ribs                                  |
| 3 face swelling                                                  |
| 4 blood clots (thrombosis)                                       |
| 5 pins and needles or numbness in fingers                        |
| 6 weight loss                                                    |
| 7 felt sick/vomiting/nausea/loss of appetite                     |
| 8 fatigue                                                        |
| 9 muscle weakness                                                |
| 10 drowsiness, weakness, dizziness or confusion                  |
| 11 high temperature (fever) of 38°C (100.4°F)                    |
| 12 other                                                         |

**Table 2:** Time intervals (days) depicted as median (50<sup>th</sup>), 75<sup>th</sup> and 90<sup>th</sup> percentiles for each of the ten jurisdictions. In Sweden, no data was available on primary care interval

| Intervals             | Centiles                 | Wales | Denmark | Sweden | England | N Ireland | Scotland | Manitoba | Ontario | Norway | Victoria |
|-----------------------|--------------------------|-------|---------|--------|---------|-----------|----------|----------|---------|--------|----------|
| Patient Interval      | Number                   | 181   | 233     | 172    | 213     | 179       | 169      | 133      | 205     | 55     | 141      |
|                       | Median                   | 21    | 14      | 21     | 17      | 18        | 21       | 25       | 22      | 19     | 14       |
|                       | 75 <sup>th</sup> centile | 61    | 53      | 61     | 65      | 60        | 60       | 67       | 61      | 60     | 60       |
|                       | 90 <sup>th</sup> centile | 216   | 180     | 214    | 205     | 240       | 267      | 180      | 187     | 277    | 180      |
| Primary Care interval | Number                   | 110   | 159     | n/a    | 147     | 124       | 119      | 80       | 75      | 19     | 89       |
|                       | Median                   | 20    | 7       |        | 11      | 13        | 16       | 30       | 29      | 7      | 10       |
|                       | 75 <sup>th</sup> centile | 43    | 20      |        | 31      | 51        | 35       | 75       | 73      | 41     | 36       |
|                       | 90 <sup>th</sup> centile | 91    | 64      |        | 73      | 112       | 90       | 138      | 183     | 102    | 99       |
| Diagnostic interval   | Number                   | 176   | 229     | 165    | 212     | 170       | 173      | 138      | 212     | 52     | 160      |
|                       | Median                   | 45    | 35      | 28     | 54      | 65        | 42       | 87       | 57      | 51     | 54       |
|                       | 75 <sup>th</sup> centile | 108   | 67      | 83     | 100     | 122       | 106      | 147      | 122     | 109    | 106      |
|                       | 90 <sup>th</sup> centile | 162   | 162     | 143    | 161     | 281       | 198      | 265      | 331     | 160    | 240      |
| Treatment interval    | Number                   | 192   | 279     | 190    | 238     | 200       | 187      | 182      | 263     | 87     | 199      |
|                       | Median                   | 43    | 16      | 34     | 22      | 32        | 42       | 19       | 47      | 24     | 0        |
|                       | 75 <sup>th</sup> centile | 64    | 25      | 59     | 41      | 48        | 62       | 56       | 70      | 44     | 22       |
|                       | 90 <sup>th</sup> centile | 89    | 37      | 77     | 56      | 72        | 90       | 97       | 96      | 72     | 41       |
| Total interval        | Number                   | 147   | 192     | 147    | 176     | 157       | 143      | 117      | 178     | 52     | 113      |
|                       | Median                   | 116   | 67      | 107    | 114     | 105       | 117      | 127      | 130     | 79     | 78       |
|                       | 75 <sup>th</sup> centile | 204   | 116     | 190    | 183     | 227       | 253      | 216      | 216     | 186    | 195      |
|                       | 90 <sup>th</sup> centile | 365   | 210     | 329    | 323     | 365       | 365      | 365      | 339     | 271    | 355      |

## Supplementary File 6 – ICBP M4 Working and Academic Reference Groups

### Section 1 – ICBP Module 4 Working Group:

Alina Zalounina Falborg, Research Unit for General Practice, Department of Public Health, Aarhus University, Bartholins Allé 2, 8000 Aarhus C, Denmark

Andriana Barisic, Department of Prevention and Cancer Control, Cancer Care Ontario, 620 University Avenue, Toronto, Ontario, M5G 2L7, Canada

Anna Gavin, Northern Ireland Cancer Registry, Centre for Public Health, Queen's University Belfast, Mulhouse Building, Mulhouse Road, Belfast, BT12 6DP, United Kingdom

Anne Kari Knudsen, European Palliative Care Research Centre (PRC), Department of Oncology, Oslo University Hospital and Institute of Clinical Medicine, University of Oslo, Oslo, N-0424 Oslo, Norway

Breann Hawryluk, Department of Patient Navigation, Cancer Care Manitoba, 675 McDermot Street, Winnipeg, Manitoba, MB R3E 0V9, Canada

Chantelle Anandan, Centre for Population Health Sciences, University of Edinburgh, Doorway 1, Medical Quad Teviot Place, Edinburgh, EH8 9DX, United Kingdom

Conan Donnelly, Centre for Public Health, Queen's University Belfast, Mulhouse Building, Mulhouse Road, Belfast, BT12 6DP, United Kingdom

David H Brewster, Scottish Cancer Registry, Information Services Division, NHS National Services Scotland, Gyle Square, 1 South Gyle Crescent, Edinburgh, EH12 9EB, United Kingdom; Centre for Population Health Sciences, University of Edinburgh, Teviot Place, Edinburgh, EH8 9DX, United Kingdom

David Weller, Centre for Population Health Sciences, University of Edinburgh, Doorway 1, Medical Quad Teviot Place, Edinburgh, EH8 9DX, United Kingdom

Donna Turner, Population Oncology, Cancer Care Manitoba, 675 McDermot Street, Winnipeg, Manitoba, MB R3E 0V9, Canada

Elizabeth Harland, Department of Epidemiology and Cancer Registry, CancerCare Manitoba, 675 McDermot Street, Winnipeg, MB R3E 0V9, Manitoba

Eva Grunfeld, Knowledge Translation Research Network Health Services Research Program, Ontario Institute for Cancer Research; Professor and Vice Chair Research Department of Family and Community Medicine, University of Toronto, 500 University Avenue, Toronto, Ontario, M5G 1V7, Canada

Evangelia Ourania Fourkala, Gynaecological Cancer Research Centre, Women's Cancer, Institute for Women's Health, University College London, London, WC1E 6BT, United Kingdom

1 Henry Jensen, Research Unit for General Practice, Department of Public Health, Aarhus University, Bartholins  
2 Allé 2, 8000 Aarhus C, Denmark  
3

4  
5 Irene Reguilon, International Cancer Benchmarking Partnership, Cancer Research UK, London, EC1V 4AD,  
6 United Kingdom  
7

8  
9 Jackie Boylan, Centre for Public Health, Queen's University Belfast, Mulhouse Building, Mulhouse Road,  
10 Belfast, BT12 6DP, United Kingdom  
11

12  
13 Jacqueline Kelly, Northern Ireland Cancer Registry, Centre for Public Health, Queen's University Belfast,  
14 Mulhouse Building, Mulhouse Road, Belfast, BT12 6DP, United Kingdom  
15

16  
17 Jatinderpal Kalsi, Gynaecological Cancer Research Centre, Women's Cancer, Institute for Women's Health,  
18 University College London, London, WC1E 6BT, United Kingdom  
19

20  
21 John Butler, The Royal Marsden, Fulham Road, London, SW3 6JJ, United Kingdom  
22

23  
24 Kerry Moore, Centre for Public Health, Queen's University Belfast, Mulhouse Building, Mulhouse Road,  
25 Belfast, BT12 6DP, United Kingdom  
26

27  
28 Maria Rejmyr Davis, Southern Sweden Regional Cancer Center, Medicon Village, Scheelevägen 8, building  
29 404, 223 81 Lund, Sweden  
30

31  
32 Martin Malmberg, Department of Oncology, Lund University Hospital, SE-221 85 Lund, Sweden  
33

34  
35 Mats Lambe, Regional Cancer Center Uppsala and Department of Medical Epidemiology and Biostatistics,  
36 Karolinska Institutet, SE-171 77 Stockholm, Sweden  
37

38  
39 Oliver Bucher, Department of Epidemiology and Cancer Registry, CancerCare Manitoba, 675 McDermot  
40 Street, Winnipeg, MB R3E 0V9, Manitoba  
41

42  
43 Peter Vedsted, Research Unit for General Practice, Department of Public Health, Aarhus University,  
44 Bartholins Allé 2, 8000 Aarhus C, Denmark  
45

46  
47 Rebecca-Jane Law, North Wales Centre for Primary Care Research, Bangor University, Cambrian House 2,  
48 Wrexham Technology Park, Wrexham, LL13 7YP, United Kingdom  
49

50  
51 Rebecca Bergin, Centre for Behavioural Research in Cancer, 615 St Kilda Rd, Melbourne, Victoria, 3004,  
52 Australia; Department of General Practice, University of Melbourne, 200 Berkeley St, Victoria, 3053,  
53 Australia  
54

55  
56 Richard D Neal, North Wales Centre for Primary Care Research, Bangor University, Cambrian House 2,  
57 Wrexham Technology Park, Wrexham, LL13 7YP, United Kingdom; Academic Unit of Primary Care, Leeds  
58 Institute of Health Sciences, University of Leeds, Leeds, LS2 9NL, United Kingdom  
59  
60

1 Samantha Harrison, Early Diagnosis and International Cancer Benchmarking Partnership, Policy and  
2 Information, Cancer Research UK, London, EC1V 4AD, United Kingdom  
3

4  
5 Sigrun Saur Almberg, Department of Cancer Research and Molecular Medicine, Faculty of Medicine,  
6 Norwegian University of Science and Technology (NTNU), N-7491 Trondheim, Norway  
7

8  
9 Therese Kearney, Northern Ireland Cancer Registry, Centre for Public Health, Queen's University Belfast,  
10 Mulhouse Building, Mulhouse Road, Belfast, BT12 6DP, United Kingdom  
11

12  
13 Victoria Cairnduff, Northern Ireland Cancer Registry, Centre for Public Health, Queen's University Belfast,  
14 Mulhouse Building, Mulhouse Road, Belfast, BT12 6DP, United Kingdom  
15

16  
17 Victoria Hammersley, Centre for Population Health Sciences, University of Edinburgh, Doorway 1, Medical  
18 Quad Teviot Place, Edinburgh, EH8 9DX, United Kingdom  
19

20  
21 Victoria White, Centre for Behavioural Research in Cancer, Cancer Council Victoria, 615 St Kilda Road,  
22 Melbourne, Victoria, 3004, Australia; School of Psychology Deakin University, Geelong, Victoria, 3217,  
23 Australia  
24

25  
26 Usha Menon, Gynaecological Cancer Research Centre, Women's Cancer, Institute for Women's Health,  
27 University College London, London, WC1E 6BT, United Kingdom  
28

29  
30 Yulan Lin, European Palliative Care Research Centre (PRC), Department of Oncology, Oslo University Hospital  
31 and Institute of Clinical Medicine, University of Oslo, Oslo, N-0424 Oslo, Norway  
32

## 33 34 35 36 **Section 2 – ICBP Module 4 Academic Reference Group:** 37

38  
39 Prof Jan Willem Coebergh, Professor of Cancer Surveillance, Department of Public Health, Erasmus  
40 Universiteit Rotterdam, Rotterdam, the Netherlands  
41

42  
43 Jon Emery, Professor of Primary Care Cancer Research, University of Melbourne and Clinical Professor of  
44 General Practice, University of Western Australia, Australia  
45

46  
47 Dr Stefan Bergström, Senior consultant oncologist, Department of Oncology, Gävle, Sweden  
48

49  
50 Dr Monique E van Leerdam, Erasmus MC University Medical Centre, the Netherlands  
51

52  
53 Prof Marie-Louise Essink-Bot, Academic Medical Centre, Amsterdam University, the Netherlands  
54

55  
56 Prof Una MacLeod, Senior Lecturer in General Practice and Primary Care, Hull-York Medical School, United  
57 Kingdom  
58  
59  
60

**The RECORD statement – checklist of items, extended from the STROBE statement, that should be reported in observational studies using routinely collected health data.**

|                           | Item No. | STROBE items                                                                                                                                                                               | Location in manuscript where items are reported | RECORD items                                                                                                                                                                                                                                                                                                                                                                                                                                | Location in manuscript where items are reported |
|---------------------------|----------|--------------------------------------------------------------------------------------------------------------------------------------------------------------------------------------------|-------------------------------------------------|---------------------------------------------------------------------------------------------------------------------------------------------------------------------------------------------------------------------------------------------------------------------------------------------------------------------------------------------------------------------------------------------------------------------------------------------|-------------------------------------------------|
| <b>Title and abstract</b> |          |                                                                                                                                                                                            |                                                 |                                                                                                                                                                                                                                                                                                                                                                                                                                             |                                                 |
|                           | 1        | (a) Indicate the study's design with a commonly used term in the title or the abstract (b) Provide in the abstract an informative and balanced summary of what was done and what was found | Title and abstract – p 1 and 3                  | RECORD 1.1: The type of data used should be specified in the title or abstract. When possible, the name of the databases used should be included.<br><br>RECORD 1.2: If applicable, the geographic region and timeframe within which the study took place should be reported in the title or abstract.<br><br>RECORD 1.3: If linkage between databases was conducted for the study, this should be clearly stated in the title or abstract. | Abstract – p 3<br><br>Abstract – p 3<br><br>N/A |
| <b>Introduction</b>       |          |                                                                                                                                                                                            |                                                 |                                                                                                                                                                                                                                                                                                                                                                                                                                             |                                                 |
| Background rationale      | 2        | Explain the scientific background and rationale for the investigation being reported                                                                                                       | Introduction – p 6                              |                                                                                                                                                                                                                                                                                                                                                                                                                                             |                                                 |
| Objectives                | 3        | State specific objectives, including any prespecified hypotheses                                                                                                                           | Introduction – p 6                              |                                                                                                                                                                                                                                                                                                                                                                                                                                             |                                                 |
| <b>Methods</b>            |          |                                                                                                                                                                                            |                                                 |                                                                                                                                                                                                                                                                                                                                                                                                                                             |                                                 |
| Study Design              | 4        | Present key elements of study design early in the paper                                                                                                                                    | Methods – p 6                                   |                                                                                                                                                                                                                                                                                                                                                                                                                                             |                                                 |
| Setting                   | 5        | Describe the setting, locations, and relevant dates, including periods of recruitment, exposure, follow-up, and data collection                                                            | Methods – p 6-8                                 |                                                                                                                                                                                                                                                                                                                                                                                                                                             |                                                 |
| Participants              | 6        | (a) <i>Cohort study</i> - Give the eligibility criteria, and the                                                                                                                           | Methods – p 6 – and as reference to             | RECORD 6.1: The methods of study population selection (such as codes or                                                                                                                                                                                                                                                                                                                                                                     | Provided as reference to                        |

|                              |   |                                                                                                                                                                                                                                                                                                                                                                                                                                                                                                                                                                                                                                                             |                                                             |                                                                                                                                                                                                                                                                                                                                                                                                                                                                                                                                                                                                                              |                                                                                                   |
|------------------------------|---|-------------------------------------------------------------------------------------------------------------------------------------------------------------------------------------------------------------------------------------------------------------------------------------------------------------------------------------------------------------------------------------------------------------------------------------------------------------------------------------------------------------------------------------------------------------------------------------------------------------------------------------------------------------|-------------------------------------------------------------|------------------------------------------------------------------------------------------------------------------------------------------------------------------------------------------------------------------------------------------------------------------------------------------------------------------------------------------------------------------------------------------------------------------------------------------------------------------------------------------------------------------------------------------------------------------------------------------------------------------------------|---------------------------------------------------------------------------------------------------|
|                              |   | <p>sources and methods of selection of participants. Describe methods of follow-up</p> <p><i>Case-control study</i> - Give the eligibility criteria, and the sources and methods of case ascertainment and control selection. Give the rationale for the choice of cases and controls</p> <p><i>Cross-sectional study</i> - Give the eligibility criteria, and the sources and methods of selection of participants</p> <p>(b) <i>Cohort study</i> - For matched studies, give matching criteria and number of exposed and unexposed</p> <p><i>Case-control study</i> - For matched studies, give matching criteria and the number of controls per case</p> | <p>previous paper.</p> <p>N/A</p>                           | <p>algorithms used to identify subjects) should be listed in detail. If this is not possible, an explanation should be provided.</p> <p>RECORD 6.2: Any validation studies of the codes or algorithms used to select the population should be referenced. If validation was conducted for this study and not published elsewhere, detailed methods and results should be provided.</p> <p>RECORD 6.3: If the study involved linkage of databases, consider use of a flow diagram or other graphical display to demonstrate the data linkage process, including the number of individuals with linked data at each stage.</p> | <p>previous paper.</p> <p>Provided as appendix and in reference to previous paper.</p> <p>N/A</p> |
| Variables                    | 7 | Clearly define all outcomes, exposures, predictors, potential confounders, and effect modifiers. Give diagnostic criteria, if applicable.                                                                                                                                                                                                                                                                                                                                                                                                                                                                                                                   | Methods – p 6-9 – and as reference to previous paper.       | RECORD 7.1: A complete list of codes and algorithms used to classify exposures, outcomes, confounders, and effect modifiers should be provided. If these cannot be reported, an explanation should be provided.                                                                                                                                                                                                                                                                                                                                                                                                              | N/A                                                                                               |
| Data sources/<br>measurement | 8 | For each variable of interest, give sources of data and details of methods of assessment (measurement). Describe comparability of assessment methods if there is more than one group                                                                                                                                                                                                                                                                                                                                                                                                                                                                        | Methods – p 6-9 – and as reference to previous paper.       |                                                                                                                                                                                                                                                                                                                                                                                                                                                                                                                                                                                                                              |                                                                                                   |
| Bias                         | 9 | Describe any efforts to address potential sources of bias                                                                                                                                                                                                                                                                                                                                                                                                                                                                                                                                                                                                   | Methods – p 7-8, discussion – p 24-25 – and as reference to |                                                                                                                                                                                                                                                                                                                                                                                                                                                                                                                                                                                                                              |                                                                                                   |

|                                  |    |                                                                                                                                                                                                                                                                                                                                                                                                                                                                                                                                                                      |                                                       |                                                                                                                                                       |     |
|----------------------------------|----|----------------------------------------------------------------------------------------------------------------------------------------------------------------------------------------------------------------------------------------------------------------------------------------------------------------------------------------------------------------------------------------------------------------------------------------------------------------------------------------------------------------------------------------------------------------------|-------------------------------------------------------|-------------------------------------------------------------------------------------------------------------------------------------------------------|-----|
|                                  |    |                                                                                                                                                                                                                                                                                                                                                                                                                                                                                                                                                                      | previous paper.                                       |                                                                                                                                                       |     |
| Study size                       | 10 | Explain how the study size was arrived at                                                                                                                                                                                                                                                                                                                                                                                                                                                                                                                            | Methods – p 6 – and as reference to previous paper.   |                                                                                                                                                       |     |
| Quantitative variables           | 11 | Explain how quantitative variables were handled in the analyses. If applicable, describe which groupings were chosen, and why                                                                                                                                                                                                                                                                                                                                                                                                                                        | Methods – p 6-8 – and as reference to previous paper. |                                                                                                                                                       |     |
| Statistical methods              | 12 | (a) Describe all statistical methods, including those used to control for confounding<br>(b) Describe any methods used to examine subgroups and interactions<br>(c) Explain how missing data were addressed<br>(d) <i>Cohort study</i> - If applicable, explain how loss to follow-up was addressed<br><i>Case-control study</i> - If applicable, explain how matching of cases and controls was addressed<br><i>Cross-sectional study</i> - If applicable, describe analytical methods taking account of sampling strategy<br>(e) Describe any sensitivity analyses | Methods – p 8 – and as reference to previous paper.   |                                                                                                                                                       |     |
| Data access and cleaning methods |    | ..                                                                                                                                                                                                                                                                                                                                                                                                                                                                                                                                                                   |                                                       | RECORD 12.1: Authors should describe the extent to which the investigators had access to the database population used to create the study population. | N/A |

|                  |    |                                                                                                                                                                                                                                                                                                                                                 |                                                                             |                                                                                                                                                                                                                                                                                                                    |                                                                               |
|------------------|----|-------------------------------------------------------------------------------------------------------------------------------------------------------------------------------------------------------------------------------------------------------------------------------------------------------------------------------------------------|-----------------------------------------------------------------------------|--------------------------------------------------------------------------------------------------------------------------------------------------------------------------------------------------------------------------------------------------------------------------------------------------------------------|-------------------------------------------------------------------------------|
|                  |    |                                                                                                                                                                                                                                                                                                                                                 |                                                                             | RECORD 12.2: Authors should provide information on the data cleaning methods used in the study.                                                                                                                                                                                                                    | Methods – p 7                                                                 |
| Linkage          |    | ..                                                                                                                                                                                                                                                                                                                                              |                                                                             | RECORD 12.3: State whether the study included person-level, institutional-level, or other data linkage across two or more databases. The methods of linkage and methods of linkage quality evaluation should be provided.                                                                                          | N/A                                                                           |
| <b>Results</b>   |    |                                                                                                                                                                                                                                                                                                                                                 |                                                                             |                                                                                                                                                                                                                                                                                                                    |                                                                               |
| Participants     | 13 | (a) Report the numbers of individuals at each stage of the study ( <i>e.g.</i> , numbers potentially eligible, examined for eligibility, confirmed eligible, included in the study, completing follow-up, and analysed)<br>(b) Give reasons for non-participation at each stage.<br>(c) Consider use of a flow diagram                          | Results and as table – p 10-11. Flow diagram in previous paper, referenced. | RECORD 13.1: Describe in detail the selection of the persons included in the study ( <i>i.e.</i> , study population selection) including filtering based on data quality, data availability and linkage. The selection of included persons can be described in the text and/or by means of the study flow diagram. | Results – p 10-15 - and as table. Flow diagram in previous paper, referenced. |
| Descriptive data | 14 | (a) Give characteristics of study participants ( <i>e.g.</i> , demographic, clinical, social) and information on exposures and potential confounders<br>(b) Indicate the number of participants with missing data for each variable of interest<br>(c) <i>Cohort study</i> - summarise follow-up time ( <i>e.g.</i> , average and total amount) | Results and as table – p 10-15.                                             |                                                                                                                                                                                                                                                                                                                    |                                                                               |
| Outcome data     | 15 | <i>Cohort study</i> - Report numbers of outcome events or summary measures over time<br><i>Case-control study</i> - Report numbers in each exposure category, or summary measures                                                                                                                                                               | Results and as table – p 16-23.                                             |                                                                                                                                                                                                                                                                                                                    |                                                                               |

|                   |    |                                                                                                                                                                                                                                                                                                                                                                                                                 |                                 |                                                                                                                                                                                                                                                                                                          |                     |
|-------------------|----|-----------------------------------------------------------------------------------------------------------------------------------------------------------------------------------------------------------------------------------------------------------------------------------------------------------------------------------------------------------------------------------------------------------------|---------------------------------|----------------------------------------------------------------------------------------------------------------------------------------------------------------------------------------------------------------------------------------------------------------------------------------------------------|---------------------|
|                   |    | of exposure<br><i>Cross-sectional study</i> - Report numbers of outcome events or summary measures                                                                                                                                                                                                                                                                                                              |                                 |                                                                                                                                                                                                                                                                                                          |                     |
| Main results      | 16 | (a) Give unadjusted estimates and, if applicable, confounder-adjusted estimates and their precision (e.g., 95% confidence interval). Make clear which confounders were adjusted for and why they were included<br>(b) Report category boundaries when continuous variables were categorized<br>(c) If relevant, consider translating estimates of relative risk into absolute risk for a meaningful time period | Results and as table – p 21-23. |                                                                                                                                                                                                                                                                                                          |                     |
| Other analyses    | 17 | Report other analyses done—e.g., analyses of subgroups and interactions, and sensitivity analyses                                                                                                                                                                                                                                                                                                               | Results – p 23.                 |                                                                                                                                                                                                                                                                                                          |                     |
| <b>Discussion</b> |    |                                                                                                                                                                                                                                                                                                                                                                                                                 |                                 |                                                                                                                                                                                                                                                                                                          |                     |
| Key results       | 18 | Summarise key results with reference to study objectives                                                                                                                                                                                                                                                                                                                                                        | Discussion – p 24               |                                                                                                                                                                                                                                                                                                          |                     |
| Limitations       | 19 | Discuss limitations of the study, taking into account sources of potential bias or imprecision. Discuss both direction and magnitude of any potential bias                                                                                                                                                                                                                                                      | Discussion – p24-25             | RECORD 19.1: Discuss the implications of using data that were not created or collected to answer the specific research question(s). Include discussion of misclassification bias, unmeasured confounding, missing data, and changing eligibility over time, as they pertain to the study being reported. | Discussion – p24-25 |
| Interpretation    | 20 | Give a cautious overall interpretation of results considering objectives, limitations, multiplicity of analyses, results from similar                                                                                                                                                                                                                                                                           | Discussion – p25-28             |                                                                                                                                                                                                                                                                                                          |                     |

|                                                           |    |                                                                                                                                                               |                                  |                                                                                                                                                          |                                                    |
|-----------------------------------------------------------|----|---------------------------------------------------------------------------------------------------------------------------------------------------------------|----------------------------------|----------------------------------------------------------------------------------------------------------------------------------------------------------|----------------------------------------------------|
|                                                           |    | studies, and other relevant evidence                                                                                                                          |                                  |                                                                                                                                                          |                                                    |
| Generalisability                                          | 21 | Discuss the generalisability (external validity) of the study results                                                                                         | Discussion, conclusion – p25-29. |                                                                                                                                                          |                                                    |
| <b>Other Information</b>                                  |    |                                                                                                                                                               |                                  |                                                                                                                                                          |                                                    |
| Funding                                                   | 22 | Give the source of funding and the role of the funders for the present study and, if applicable, for the original study on which the present article is based | Funding statement – p 31         |                                                                                                                                                          |                                                    |
| Accessibility of protocol, raw data, and programming code |    | ..                                                                                                                                                            |                                  | RECORD 22.1: Authors should provide information on how to access any supplemental information such as the study protocol, raw data, or programming code. | Availability of data and material statement – p 31 |

\*Reference: Benchimol EI, Smeeth L, Guttman A, Harron K, Moher D, Petersen I, Sørensen HT, von Elm E, Langan SM, the RECORD Working Committee. The REporting of studies Conducted using Observational Routinely-collected health Data (RECORD) Statement. *PLoS Medicine* 2015; in press.

\*Checklist is protected under Creative Commons Attribution ([CC BY](https://creativecommons.org/licenses/by/4.0/)) license.

# BMJ Open

## Time intervals and routes to diagnosis for lung cancer in ten jurisdictions: cross-sectional study findings from the International Cancer Benchmarking Partnership (ICBP)

|                               |                                                                                                                                                                                                                                                                                                                                                                                                                                                                                                                                                                                                                                                                                                                                                                                                                                                                                                                                                                                                                                                                                                                                                                                                                                                                                                                                                                                                                                                                                                                                                                                                                                                                                                                                                                                                                                                                                                                                                                                                                                                                                                                                                   |
|-------------------------------|---------------------------------------------------------------------------------------------------------------------------------------------------------------------------------------------------------------------------------------------------------------------------------------------------------------------------------------------------------------------------------------------------------------------------------------------------------------------------------------------------------------------------------------------------------------------------------------------------------------------------------------------------------------------------------------------------------------------------------------------------------------------------------------------------------------------------------------------------------------------------------------------------------------------------------------------------------------------------------------------------------------------------------------------------------------------------------------------------------------------------------------------------------------------------------------------------------------------------------------------------------------------------------------------------------------------------------------------------------------------------------------------------------------------------------------------------------------------------------------------------------------------------------------------------------------------------------------------------------------------------------------------------------------------------------------------------------------------------------------------------------------------------------------------------------------------------------------------------------------------------------------------------------------------------------------------------------------------------------------------------------------------------------------------------------------------------------------------------------------------------------------------------|
| Journal:                      | <i>BMJ Open</i>                                                                                                                                                                                                                                                                                                                                                                                                                                                                                                                                                                                                                                                                                                                                                                                                                                                                                                                                                                                                                                                                                                                                                                                                                                                                                                                                                                                                                                                                                                                                                                                                                                                                                                                                                                                                                                                                                                                                                                                                                                                                                                                                   |
| Manuscript ID                 | bmjopen-2018-025895.R1                                                                                                                                                                                                                                                                                                                                                                                                                                                                                                                                                                                                                                                                                                                                                                                                                                                                                                                                                                                                                                                                                                                                                                                                                                                                                                                                                                                                                                                                                                                                                                                                                                                                                                                                                                                                                                                                                                                                                                                                                                                                                                                            |
| Article Type:                 | Research                                                                                                                                                                                                                                                                                                                                                                                                                                                                                                                                                                                                                                                                                                                                                                                                                                                                                                                                                                                                                                                                                                                                                                                                                                                                                                                                                                                                                                                                                                                                                                                                                                                                                                                                                                                                                                                                                                                                                                                                                                                                                                                                          |
| Date Submitted by the Author: | 02-May-2019                                                                                                                                                                                                                                                                                                                                                                                                                                                                                                                                                                                                                                                                                                                                                                                                                                                                                                                                                                                                                                                                                                                                                                                                                                                                                                                                                                                                                                                                                                                                                                                                                                                                                                                                                                                                                                                                                                                                                                                                                                                                                                                                       |
| Complete List of Authors:     | <p>Menon, Usha; University College London, Institute for Women's Health Vedsted, Peter; Aarhus University, Research Unit for General Practice Zalounina Falborg, Alina; Aarhus University, Research Unit for General Practice</p> <p>Jensen, Henry; Aarhus University, Research Unit for General Practice Harrison, Samantha; Cancer Research UK, Policy &amp; information Reguilon, Irene; Cancer Research UK, Policy &amp; information Barisic, Andriana; Cancer Care Ontario</p> <p>Bergin, Rebecca; Cancer Council Victoria, Centre for Behavioural Research in Cancer; University of Melbourne, Department of General Practice</p> <p>Brewster, David; Edinburgh University, Centre for Population Health Sciences; NHS Scotland National Services Division, Scottish Cancer Registry, Information Services Division</p> <p>Butler, John; The Royal Marsden</p> <p>Brustugun, Odd Terje; Oslo University Hospital, Institute for Cancer Research</p> <p>Bucher, Oliver; CancerCare Manitoba, Department of Epidemiology and Cancer Registry</p> <p>Cairnduff, Victoria; Queen's University Belfast, Northern Ireland Cancer Registry</p> <p>Gavin, Anna; Queen's University Belfast, Northern Ireland Cancer Registry</p> <p>Grunfeld, Eva; Ontario Institute for Cancer Research, Health Services Research Program</p> <p>Harland, Elizabeth; CancerCare Manitoba, Department of Epidemiology and Cancer Registry</p> <p>Kalsi, Jatinderpal; University College London, Institute for Women's Health</p> <p>Knudsen, Anne Kari; Oslo University Hospital, European Palliative Care Research Centre (PRC); University of Oslo, Institute of Clinical Medicine</p> <p>Lambe, Mats; Karolinska Institutet, Department of Medical Epidemiology; University Hospital, Regional Oncologic Center</p> <p>Law, Rebecca-Jane; Bangor University, North Wales Centre for Primary Care Research</p> <p>Lin, Yulan; University of Oslo, Institute of Clinical Medicine; Oslo University Hospital, European Palliative Care Research Centre (PRC)</p> <p>Malmberg, Martin; Skanes universitetssjukhus Lund</p> <p>Turner, Donna; CancerCare Manitoba</p> |

|                                 |                                                                                                                                                                                                                                                                                                                                                  |
|---------------------------------|--------------------------------------------------------------------------------------------------------------------------------------------------------------------------------------------------------------------------------------------------------------------------------------------------------------------------------------------------|
|                                 | Neal, Richard; Bangor University, North Wales Centre for Primary Care Research; University of Leeds, Academic Unit of Primary Care<br>White, Victoria; Cancer Council Victoria, Centre for Behavioural Research in Cancer; Deakin University, School of Psychology<br>Weller, David; Edinburgh University, Centre for Population Health Sciences |
| <b>Primary Subject Heading</b>: | Epidemiology                                                                                                                                                                                                                                                                                                                                     |
| Secondary Subject Heading:      | Global health                                                                                                                                                                                                                                                                                                                                    |
| Keywords:                       | EPIDEMIOLOGY, International health services < HEALTH SERVICES ADMINISTRATION & MANAGEMENT, Organisation of health services < HEALTH SERVICES ADMINISTRATION & MANAGEMENT, Respiratory tract tumours < ONCOLOGY, lung cancer, routes to diagnosis, time intervals, international health systems, symptomatic presentation                         |
|                                 |                                                                                                                                                                                                                                                                                                                                                  |

SCHOLARONE™  
Manuscripts

1  
2  
3 **Time intervals and routes to diagnosis for lung cancer in ten jurisdictions: cross-**  
4 **sectional study findings from the International Cancer Benchmarking Partnership**  
5 **(ICBP)**  
6  
7  
8

- 9  
10 1. Usha Menon\*, MRC Clinical Trials Unit at UCL, Institute of Clinical Trials &  
11 Methodology, , University College London, London, United Kingdom  
12  
13 2. Peter Vedsted\*, Research Unit for General Practice, Aarhus University, Aarhus,  
14 Denmark  
15  
16 3. Alina Zalounina Falborg, Research Unit for General Practice, Aarhus University, Aarhus,  
17 Denmark  
18  
19 4. Henry Jensen, Research Unit for General Practice, Aarhus University, Aarhus, Denmark  
20  
21 5. Samantha Harrison, Policy and Information, Cancer Research UK, London, United  
22 Kingdom  
23  
24 6. Irene Reguilon, Policy and Information, Cancer Research UK, London, United Kingdom  
25  
26 7. Andriana Barisic, Ontario Renal Network, Cancer Care Ontario, Toronto, Canada  
27  
28 8. Rebecca J Bergin, Centre for Behavioural Research in Cancer, Cancer Council Victoria,  
29 Victoria, Australia; Department of General Practice, University of Melbourne, Victoria,  
30 Australia  
31  
32 9. David H Brewster, Scottish Cancer Registry, Information Services Division, NHS  
33 National Services Scotland, Edinburgh, United Kingdom; Centre for Population Health  
34 Sciences, University of Edinburgh, Edinburgh, United Kingdom  
35  
36 10. John Butler, The Royal Marsden, Fulham Road, London, United Kingdom  
37  
38 11. Odd Terje Brustugun, Institute for Cancer Research, Department of Cancer Genetics,  
39 Oslo University Hospital, Oslo, Norway  
40  
41 12. Oliver Bucher, Department of Epidemiology and Cancer Registry, CancerCare Manitoba,  
42 Manitoba  
43  
44 13. Victoria Cairnduff, Northern Ireland Cancer Registry, Centre for Public Health, Queen's  
45 University Belfast, Mulhouse Building, Mulhouse Road, Belfast, United Kingdom  
46  
47 14. Anna T Gavin, Northern Ireland Cancer Registry, Queen's University Belfast, Belfast,  
48 United Kingdom  
49  
50  
51  
52  
53  
54  
55  
56  
57  
58  
59  
60

15. Eva Grunfeld, Health Services Research Program, Ontario Institute for Cancer Research, Toronto, Canada
16. Elizabeth Harland, Department of Epidemiology and Cancer Registry, CancerCare Manitoba, Winnipeg, Canada
17. Jatinderpal Kalsi, Women's Cancer, Institute for Women's Health, University College London, London, United Kingdom
18. Anne Kari Knudsen, European Palliative Care Research Centre (PRC), Department of Oncology, Oslo University Hospital and Institute of Clinical Medicine, University of Oslo, Oslo, Norway
19. Mats Lambe, Regional Cancer Center Uppsala and Department of Medical Epidemiology and Biostatistics, Karolinska Institutet, Stockholm, Sweden
20. Rebecca-Jane Law, North Wales Centre for Primary Care Research, Bangor University, Wrexham, United Kingdom
21. Yulan Lin, European Palliative Care Research Centre (PRC), Department of Oncology, Oslo University Hospital and Institute of Clinical Medicine, University of Oslo, Oslo, Norway
22. Martin Malmberg, Department of Oncology, Lund University Hospital, Lund, Sweden
23. Donna Turner, Population Oncology, Cancer Care Manitoba, Winnipeg, Canada
24. Richard D Neal, North Wales Centre for Primary Care Research, Bangor University, Wrexham, United Kingdom; Academic Unit of Primary Care, University of Leeds, Leeds, United Kingdom
25. Victoria White, Centre for Behavioral Research in Cancer, Cancer Council Victoria, Victoria, Australia; School of Psychology Deakin University, Geelong, Victoria, 3217, Australia
26. David Weller\*, Centre for Population Health Sciences, University of Edinburgh, Edinburgh, United Kingdom

On behalf of the ICBP Module 4 Working Group

\* equal contribution

1  
2  
3 Corresponding author:

4 Professor Usha Menon

5 MRC CTU at UCL

6 Institute of Clinical Trials and Methodology

7 90 High Holborn, 2nd Floor, London WC1V 6LJ

8 Email: u.menon@ucl.ac.uk

9  
10  
11  
12  
13  
14  
15  
16 Word count: 3074; Tables: 6 ; Figures: 2 ; Appendix A-D

17  
18  
19  
20  
21  
22  
23  
24  
25  
26  
27  
28  
29  
30  
31  
32  
33  
34  
35  
36  
37  
38  
39  
40  
41  
42  
43  
44  
45  
46  
47  
48  
49  
50  
51  
52  
53  
54  
55  
56  
57  
58  
59  
60

For peer review only

## Abstract

### Objective

Differences in time intervals to diagnosis and treatment between jurisdictions may contribute to previously reported differences in stage at diagnosis and survival. The International Cancer Benchmarking Partnership Module 4 (ICBP M4) reports the first international comparison of routes to diagnosis and time intervals from symptom onset until treatment start for lung cancer patients.

### Design

Newly diagnosed lung cancer patients, their primary care physicians (PCP) and cancer treatment specialists (CTS) were surveyed in Victoria (Australia), Manitoba and Ontario (Canada), Northern Ireland, England, Scotland and Wales (UK), Denmark, Norway and Sweden. Using Wales as the reference jurisdiction, the 50<sup>th</sup>, 75<sup>th</sup> and 90<sup>th</sup> percentiles for intervals were compared using quantile regression adjusted for age, gender and comorbidity.

### Participants

Consecutive newly diagnosed lung cancer patients, aged >40 years, diagnosed between October 2012 and March 2015 were identified through cancer registries. Of 10,203 eligible symptomatic patients contacted, 2,631 (27.5%) responded and 2,143 (21.0%) were included in the analysis. Data was also available from 1,211 (56.6%) of their PCPs and 643 (37.0%) of their CTS.

### Primary and secondary outcome measures:

Interval lengths (days, primary), routes to diagnosis, symptoms (secondary).

### Results

With the exception of Denmark (-49 days), in all other jurisdictions the median adjusted total interval from symptom onset to treatment, for respondents diagnosed in 2012-15, was similar to that of Wales (116 days). Denmark had shorter median adjusted primary care interval (-11 days) than Wales (20 days); Sweden had shorter (-20) and Manitoba longer (+40) median adjusted diagnostic intervals compared to Wales (45 days). Denmark (-13), Manitoba (-11), England (-9) and Northern Ireland (-4) had shorter median adjusted treatment intervals than Wales (43 days). The differences were greater for the 10% of patients who waited the longest. Based on overall trends, jurisdictions could be grouped into those with trends of reduced,

1  
2  
3 longer and similar intervals to Wales. The proportion of patients diagnosed following  
4 presentation to the PCP ranged from 35-75%.  
5  
6  
7

### 8 **Conclusion**

9 There are differences between jurisdictions in interval to treatment, which are magnified in  
10 lung cancer patients who wait the longest. The data could help jurisdictions develop more  
11 focused lung cancer policy and targeted clinical initiatives. Future analysis will explore if these  
12 differences in intervals impact on stage or survival.  
13  
14  
15  
16

### 17 **Key words:**

18 lung cancer, routes to diagnosis, time intervals, international health systems, symptomatic  
19 presentation  
20  
21  
22  
23  
24  
25  
26  
27  
28  
29  
30  
31  
32  
33  
34  
35  
36  
37  
38  
39  
40  
41  
42  
43  
44  
45  
46  
47  
48  
49  
50  
51  
52  
53  
54  
55  
56  
57  
58  
59  
60

### Strengths and limitations of this study

- This is the first study to use standardized survey methods and definitions to systematically examine key intervals from patients first noticing symptoms or bodily changes until the start of treatment for lung cancer across multiple jurisdictions
- Recall bias was minimised by the triangulation of different data sources and by patients completing the questionnaire within a limited time window (median 5 months) after the cancer diagnosis
- A key limitation, as with all questionnaire-based studies was selection and non-response bias which varied across jurisdictions
- Recruitment of patients up to 9 rather than 6 months after diagnosis might have magnified selection bias due to high mortality in lung cancer but a sensitivity analysis suggests that this did not impact on the results.
- The comparisons for Norway and Victoria, are limited by small sample size and inclusion of only surgical patients, respectively.

## Introduction

Lung cancer is the most common cancer worldwide, with nearly 1.83 million cases diagnosed in 2012, and is the leading cause of cancer death globally, accounting for 19% of cancer deaths.[1] Survival is typically low, with 5-year survival in Europe, North America and Australia <20%. [2-3] A key factor is diagnosis at advanced stage. Reasons for this are multi-faceted and include delays due to the atypical nature of some presenting symptoms, poor sensitivity of chest X-rays and physicians not acting quickly enough.[4] Within European countries, differences of 12 and 5 percentage points in 1- and 5-year relative survival, respectively, have been reported for lung cancers diagnosed between 1999-2007.[5] This and other international comparisons raises the possibility of additional contributory factors such as variations in referral patterns, access to diagnostic tests and delays in treatment.[6]

One way of addressing this is to chart the patient journey from first noticing symptoms to treatment start. Many national studies using different methodologies have reported on time intervals to treatment of lung cancer and there are reviews that have looked at international timeframe comparisons [7-10]. [11-24] However, as far as we are aware there is no study that has undertaken international comparisons of timeliness across multiple countries using the same methodology.

The International Cancer Benchmarking Partnership (ICBP) was established to explore differences in cancer outcomes and their causes in countries with comparable wealth and universal access to healthcare.[25] We report results from Module 4 (ICBP M4) on differences in time intervals and routes to diagnosis in symptomatic lung cancer patients from ten jurisdictions in Australia, Canada, Denmark, Norway, Sweden and the United Kingdom.

## Methods

Methods have been previously detailed.[26] In brief, in each of the ten participating jurisdictions (Victoria (Australia), Manitoba, Ontario (Canada), Denmark, Norway, Sweden Northern Ireland, England, Scotland and Wales), consecutive patients aged  $\geq 40$  years, newly diagnosed with malignant lung or bronchus cancer (ICD-10:C34.0-C34.9; ICD-O-3 behaviour code /3) were identified by the cancer registry using validated methods (hospital episode, cancer registration, pathology). Exclusion criteria included previous lung or synchronous cancers. Patients with a previous non-lung primary cancer were eligible. Target recruitment was 200 symptomatic patients per jurisdiction.

Following a vital status check, cancer registries posted the patient questionnaire (Appendix A1) either 1) to the relevant primary care physician (PCP) who then forwarded the pre-

1  
2  
3 addressed envelope to the patient after confirmation that the person was aware of the  
4 diagnosis and not deemed too sick/anxious to participate in the survey. (Wales, England,  
5 Scotland) or 2) to the patient directly or via the research team (remaining seven jurisdictions).  
6  
7 In an attempt to decrease attrition and recall bias, the protocol initially specified that all patient  
8 questionnaires should be completed within 6 months of diagnosis. As there were  
9 administrative delays in cancer notification, this was extended to 9 months.  
10  
11  
12  
13

14 On receipt of a completed patient questionnaire, in all jurisdictions except Sweden, the  
15 relevant PCP and cancer treatment specialist (CTS) were sent questionnaires (Appendix A.2  
16 and A.3). Specialists provided information on diagnosis and start date of treatment. The latter  
17 was collected directly from registry records in Northern Ireland and clinical databases in  
18 Denmark. Manitoba did not provide specialist data. Date of diagnosis and stage was also  
19 collected where possible through cancer registries. Information on the types of treatment  
20 (surgery, chemotherapy, radiotherapy and other) were obtained from the patient survey.  
21  
22  
23  
24  
25

### 26 27 *Data handling*

28 Data were recoded centrally to ensure that the same explicit rules were applied throughout.  
29 Patients in whom age, date of diagnosis or consent were missing were excluded from  
30 analyses. Rules were used to combine data from the different sources in a standardised way  
31 that ensured reproducibility and transparency (Appendix B). The rules employed a 'hierarchy'  
32 principle in terms of the order in which different data sources were used and included  
33 imputation rules based on the available data. The exact rule was guided by the measure in  
34 question – for example, patient interval was collected primarily from the patient questionnaire  
35 whereas primary care time-points from the PCP questionnaire. We applied rules for outliers  
36 and implausible measures (e.g. negative time intervals were recorded to zero-days and  
37 intervals longer than a year to 365 days).  
38  
39  
40  
41  
42  
43  
44  
45

### 46 *Routes to diagnosis and symptoms prompting physician visit*

47 These were derived from patient and PCP responses. Symptoms were coded by two PCP  
48 authors (DW and PV) into 'lung cancer specific' or 'other' (Appendix C1).  
49  
50  
51

### 52 *Time intervals*

53 Time intervals were derived using the checklist for the Aarhus Statement.[27] The following  
54 time-points were used to calculate the corresponding time intervals (Figure 1):  
55  
56

- 57 • first noticing symptoms
- 58 • first presentation to health care
- 59 • first referral to secondary care
- 60

- diagnosis date
- start of curative or palliative treatment

---

FIGURE 1

---

All time-points were validated if there were obvious inconsistencies and negative intervals were set to 0 days. All intervals were truncated at 365 days. Missing data were imputed based on specific rules to ensure that the direction of a possible misclassification bias was known.

### *Demographics*

Health status was measured using the self-reported general health item from short form 36 health survey (SF36).[28] Comorbidity was defined as one of four patient or PCP-reported diseases (heart or lung disease, stroke or diabetes) and categorised into: 'none', 'medium' (one or two) or 'high' (three or four). Level of educational was categorised as 'low' (vocational school or lower) and 'high' (university). Stage data (tumour, node, metastasis - TNM - classification) was grouped as I, II, III, IV or missing.[29]

### *Statistical analysis*

Patient characteristics across jurisdictions were compared using Kruskal-Wallis test for continuous and ordinal data. For nominal data we used Pearson's chi-squared test and Fisher's exact test (if more than 20% of expected cell counts were less than 5 or at least one expected cell count was 0). The differences in intervals between the jurisdictions were estimated using quantile regression, as this method allows for a comparison across the whole distribution of length of the interval.[30] As we were interested in a measure of central tendency of length of the interval and in long and very long intervals, the focus of the study was on the 50<sup>th</sup>(median), 75<sup>th</sup> and 90<sup>th</sup> interval percentiles. Wales was chosen as the reference jurisdiction as it had the lowest lung cancer survival in ICBP Module 1 analysis.[10] Since the length of the interval in days is a continuous measure which has been rounded, we applied the quantile regression analysis on the smoothed quantiles; the method based on the smoothed quantiles is recommended for analyses of discrete (count) data [31]. In STATA this method is implemented in the 'qcount' procedure.[32] Parameters were calculated with 1000 jittered samples. For all interval analyses, the differences in intervals were calculated as marginal effects after quantile regression by setting the continuous covariate (age) to their mean values and the categorical covariates (sex and comorbidity) to their modes. Significance level was set to  $\leq 0.05$  with 95% confidence intervals (95%CI) calculated where appropriate. Statistical analyses were carried out using STATA v14.

### *Sensitivity and validity analyses*

All analyses were repeated using only (1) those who fulfilled the 6-month cut-off criteria for interval from diagnosis to questionnaire completion and (2) patient data. The effect of excluding patients for whom at least one interval was missing was investigated. We also repeated the analysis after omitting time intervals which were negative or over 365 days. Agreement between the different data sources (registry, patient, PCP (except in Sweden) and CTS (except in Sweden and Manitoba) was measured by Lin's concordance correlation coefficient (CCC).[33]

### *Patient involvement*

The research questions for this survey drew on an extensive literature relating to diagnosis and treatment delays leading to negative patient experiences. While patient experience was not a primary outcome measure for this study, patients were given the opportunity to comment on their experience through questionnaire free-text response options (under separate analysis). Patients were involved in the piloting of study instruments to ascertain if recruitment and questionnaire content and dissemination strategies were appropriate, described elsewhere.[26] Each jurisdiction has committed to communicating the findings and local implications of this study to organisations representing their study participants.

### **Results**

Of 14,583 lung cancer patients, diagnosed between October 2012 and March 2015 who were alive when identified, 70% (10,203/14,583) were contacted (Table 1). Of 4380 not contacted, 3367 (77%) were from England, Wales and Scotland. Major reasons reported by the PCP for not forwarding the survey included patients being terminally ill, not aware of cancer diagnosis at the time of request, having cognitive or visual impairment, language / communication difficulties, no longer at the address, not wishing to take part in research and a handful not having the index cancer. In addition patients identified were not contacted in England as the target recruitment had been exceeded. For the non-UK jurisdictions, the main reasons for not contacting patients were the patient having died or no longer at the address.

2,631 (27.5% of contacted, 18% of eligible) completed the patient questionnaire at a median of 5 months (range: 0.1,9) after diagnosis (Table 2). The response rate of contacted patients varied from 11.1% (146/1318) in Norway to 61.8% (333/539) in Denmark. Responding patients were more likely to be aged 60-79 years with less advanced stage (Table 1) and alive one year post diagnosis (data not shown). Of the 2,631 responses, 2,143 (81.5%) were included in the analyses which equates to 14.7% (2,143/14,583) of eligible patients. The key reason respondents were excluded were local oversampling (43.9%; 214/488) for additional analyses

1  
2  
3 (Table 1). In Victoria, the registry was only able to contact patients who had undergone surgery  
4 while the sample size in Norway was limited (n=88) due to delays in securing appropriate  
5 approvals.  
6  
7  
8  
9  
10  
11  
12  
13  
14  
15  
16  
17  
18  
19  
20  
21  
22  
23  
24  
25  
26  
27  
28  
29  
30  
31  
32  
33  
34  
35  
36  
37  
38  
39  
40  
41  
42  
43  
44  
45  
46  
47  
48  
49  
50  
51  
52  
53  
54  
55  
56  
57  
58  
59  
60

For peer review only

Table 1: Cohort for all ten jurisdictions and overall

| Jurisdiction                                                               | Patients approached via PCP |               |              |               |              |               | Patient approached directly by registries/research teams |                        |               |                        |            |               |                        |               |                        |               | Total         |               |                           |               |                           |                           |
|----------------------------------------------------------------------------|-----------------------------|---------------|--------------|---------------|--------------|---------------|----------------------------------------------------------|------------------------|---------------|------------------------|------------|---------------|------------------------|---------------|------------------------|---------------|---------------|---------------|---------------------------|---------------|---------------------------|---------------------------|
|                                                                            | Wales                       |               | England      |               | Scotland     |               | N Ireland                                                |                        | Denmark       |                        | Manitoba   |               | Ontario                |               | Sweden                 |               |               |               | Norway                    |               | Victoria                  |                           |
|                                                                            | n                           | (%)           | n            | (%)           | n            | (%)           | n                                                        | (%)                    | n             | (%)                    | n          | (%)           | n                      | (%)           | n                      | (%)           | n             | (%)           | n                         | (%)           | n                         | (%)                       |
| <b>Eligible patients <sup>a, b</sup></b>                                   | <b>1,811</b>                | <b>(100)</b>  | <b>2,517</b> | <b>(100)</b>  | <b>1,366</b> | <b>(100)</b>  | <b>620</b>                                               | <b>(100)</b>           | <b>539</b>    | <b>(100)</b>           | <b>980</b> | <b>(100)</b>  | <b>4,080</b>           | <b>(100)</b>  | <b>493</b>             | <b>(100)</b>  | <b>1,318</b>  | <b>(100)</b>  | <b>859</b>                | <b>(100)</b>  | <b>14,583</b>             | <b>(100)</b>              |
| <b>Packs sent to PCP <sup>c, d</sup></b>                                   | <b>1,811</b>                | <b>(99.7)</b> | <b>1,759</b> | <b>(69.9)</b> | <b>1,137</b> | <b>(83.2)</b> |                                                          |                        |               |                        |            |               |                        |               |                        |               |               |               |                           |               | <b>4,707</b>              | <b>(82.7)</b>             |
| pack not forwarded by PCP                                                  | 547                         | (30.1)        | 255          | (14.5)        | 201          | (17.7)        |                                                          |                        |               |                        |            |               |                        |               |                        |               |               |               |                           |               | 1,003                     | (21.3)                    |
| unsure if pack forwarded by PCP                                            | 531                         | (29.2)        | 559          | (31.8)        | 234          | (20.6)        |                                                          |                        |               |                        |            |               |                        |               |                        |               |               |               |                           |               | 1,324                     | (28.1)                    |
| <b>Patients contacted by PCP <sup>c, d</sup></b>                           | <b>733</b>                  | <b>(40.4)</b> | <b>945</b>   | <b>(53.7)</b> | <b>702</b>   | <b>(61.7)</b> |                                                          |                        |               |                        |            |               |                        |               |                        |               |               |               |                           |               | <b>2,380</b>              | <b>(50.6)</b>             |
| <b>Patients approached directly <sup>e</sup></b>                           |                             |               |              |               |              |               | <b>614</b>                                               | <b>(99.0)</b>          | <b>539</b>    | <b>(100)</b>           | <b>745</b> | <b>(76.0)</b> | <b>3,687</b>           | <b>(90.4)</b> | <b>493</b>             | <b>(100)</b>  | <b>1,200</b>  | <b>(91)</b>   | <b>545</b>                | <b>(63.4)</b> | <b>7,823</b>              | <b>(88)</b>               |
| patient died                                                               |                             |               |              |               |              |               | 6                                                        | (1.0)                  | 0             | (0.0)                  | 103        | (13.8)        | 249                    | (6.8)         | 0                      | (0.0)         | 0             | (0.0)         | 0                         | (0.0)         | 358                       | (4.6)                     |
| no address                                                                 |                             |               |              |               |              |               | 0                                                        | (0.0)                  | 0             | (0.0)                  | 9          | (1.2)         | 255                    | (6.9)         | 0                      | (0.0)         | 0             | (0.0)         | 0                         | (0.0)         | 264                       | (3.4)                     |
| Other                                                                      |                             |               |              |               |              |               | 0                                                        | (0.0)                  | 0             | (0.0)                  | 6          | (0.8)         | 215                    | (5.8)         | 0                      | (0.0)         | 0             | (0.0)         | 0                         | (0.0)         | 221                       | (2.8)                     |
| <b>Patient responses (% of eligible patients) <sup>e</sup></b>             | <b>223</b>                  | <b>(12.3)</b> | <b>261</b>   | <b>(10.4)</b> | <b>235</b>   | <b>(17.2)</b> | <b>226</b>                                               | <b>(36.5)</b>          | <b>333</b>    | <b>(61.8)</b>          | <b>205</b> | <b>(20.9)</b> | <b>572</b>             | <b>(14.0)</b> | <b>217</b>             | <b>(44)</b>   | <b>146</b>    | <b>(11.1)</b> | <b>213</b>                | <b>(24.8)</b> | <b>2,631</b>              | <b>(18)</b>               |
| <b>Patient responses (% of contacted) <sup>e</sup></b>                     | <b>223</b>                  | <b>(30.4)</b> | <b>261</b>   | <b>(27.6)</b> | <b>235</b>   | <b>(33.5)</b> | <b>226</b>                                               | <b>(37.2)</b>          | <b>333</b>    | <b>(61.8)</b>          | <b>205</b> | <b>(32.7)</b> | <b>572</b>             | <b>(19.3)</b> | <b>217</b>             | <b>(44)</b>   | <b>146</b>    | <b>(12.2)</b> | <b>213</b>                | <b>(39.1)</b> | <b>2,631</b>              | <b>(27.5)</b>             |
| extra sample for local purpose                                             | 0                           | (0.0)         | 0            | (0.0)         | 0            | (0.0)         | 0                                                        | (0.0)                  | 0             | (0.0)                  | 0          | (0.0)         | 214                    | (37.4)        | 0                      | (0.0)         | 0             | (0.0)         | 0                         | (0.0)         | 214                       | (8.1)                     |
| other                                                                      | 0                           | (0.0)         | 0            | (0.0)         | 35           | (14.9)        | 25                                                       | (11.1)                 | 38            | (11.4)                 | 0          | (0.0)         | 43                     | (7.5)         | 0                      | (0.0)         | 0             | (0.0)         | 3                         | (1.4)         | 144                       | (5.5)                     |
| <b>Patient surveys submitted for analyses <sup>f</sup></b>                 | <b>223</b>                  | <b>(100)</b>  | <b>261</b>   | <b>(100)</b>  | <b>200</b>   | <b>(85.1)</b> | <b>201</b>                                               | <b>(88.9)</b>          | <b>295</b>    | <b>(88.6)</b>          | <b>205</b> | <b>(100)</b>  | <b>315</b>             | <b>(55.1)</b> | <b>217</b>             | <b>(100)</b>  | <b>146</b>    | <b>(100)</b>  | <b>210</b>                | <b>(98.6)</b> | <b>2,273</b>              | <b>(86.4)</b>             |
| excluded for analyses – total                                              | 12                          | (5.4)         | 9            | (3.4)         | 2            | (1.0)         | 1                                                        | (0.5)                  | 10            | (3.4)                  | 3          | (1.5)         | 27                     | (8.6)         | 6                      | (2.8)         | 58            | (39.7)        | 2                         | (1.0)         | 130                       | (5.7)                     |
| - previous cancer                                                          | 0                           | (0.0)         | 5            | (1.9)         | 0            | (0.0)         | 0                                                        | (0.0)                  | 0             | (0.0)                  | 0          | (0.0)         | 3                      | (1.0)         | 0                      | (0.0)         | 0             | (0.0)         | 0                         | (0.0)         | 8                         | (0.4)                     |
| - unknown date of consent or diagnosis                                     | 0                           | (0.0)         | 0            | (0.0)         | 0            | (0.0)         | 0                                                        | (0.0)                  | 5             | (1.7)                  | 0          | (0.0)         | 1                      | (0.3)         | 6                      | (2.8)         | 4             | (2.7)         | 0                         | (0.0)         | 16                        | (0.7)                     |
| - consent too late/too early                                               | 12                          | (5.4)         | 4            | (1.5)         | 2            | (1.0)         | 1                                                        | (0.5)                  | 5             | (1.7)                  | 3          | (1.5)         | 22                     | (7.0)         | 0                      | (0.0)         | 33            | (22.6)        | 2                         | (1.0)         | 84                        | (3.7)                     |
| - other                                                                    | 0                           | (0.0)         | 0            | (0.0)         | 0            | (0.0)         | 0                                                        | (0.0)                  | 0             | (0.0)                  | 0          | (0.0)         | 1                      | (0.3)         | 0                      | (0.0)         | 21            | (14.4)        | 0                         | (0.0)         | 22                        | (1.0)                     |
| <b>Patients included in analyses <sup>i</sup> (% of forwarded surveys)</b> | <b>211</b>                  | <b>(94.6)</b> | <b>252</b>   | <b>(96.6)</b> | <b>198</b>   | <b>(99.0)</b> | <b>200</b>                                               | <b>(99.5)</b>          | <b>285</b>    | <b>(96.6)</b>          | <b>202</b> | <b>(98.5)</b> | <b>288</b>             | <b>(91.4)</b> | <b>211</b>             | <b>(97.2)</b> | <b>88</b>     | <b>(60.3)</b> | <b>208</b>                | <b>(99.0)</b> | <b>2,143</b>              | <b>(94.3)<sup>h</sup></b> |
| <b>PCP surveys <sup>j</sup> (% of analysed patients)</b>                   | <b>133</b>                  | <b>(63.0)</b> | <b>196</b>   | <b>(77.8)</b> | <b>149</b>   | <b>(75.3)</b> | <b>181</b>                                               | <b>(90.5)</b>          | <b>218</b>    | <b>(76.5)</b>          | <b>109</b> | <b>(54.0)</b> | <b>93</b>              | <b>(32.5)</b> | <b>n/a<sup>h</sup></b> | <b>27</b>     | <b>(30.7)</b> | <b>105</b>    | <b>(50.5)</b>             | <b>1,211</b>  | <b>(56.6)<sup>i</sup></b> |                           |
| <b>Specialist surveys <sup>k</sup> (% of analysed patients)</b>            | <b>98</b>                   | <b>(46.4)</b> | <b>153</b>   | <b>(60.7)</b> | <b>106</b>   | <b>(53.5)</b> | <b>n/a<sup>g</sup></b>                                   | <b>149<sup>g</sup></b> | <b>(52.3)</b> | <b>n/a<sup>h</sup></b> | <b>62</b>  | <b>(21.7)</b> | <b>n/a<sup>h</sup></b> | <b>20</b>     | <b>(22.7)</b>          | <b>55</b>     | <b>(26.4)</b> | <b>643</b>    | <b>(37.0)<sup>m</sup></b> |               |                           |                           |

<sup>a</sup>Eligible as per protocol: individual aged 40 years or more, with cancer of the lung or bronchus (ICD-10 code: C34.0-C34.9; behaviour code ICD-O 3) but no synchronous primary cancer or prior history of lung cancer, alive at identification who completed consent to participate within nine months of diagnosis. <sup>b</sup>In some jurisdictions some 'eligible' patients had pre-opted out from being contacted and a small number where PCP information was not available. <sup>c</sup>Percentages of eligible patients. <sup>d</sup>Maximum of potentially contacted patients. i.e. sum of packs forwarded by PCP and packs unsure if forwarded by PCP. <sup>e</sup>Percentages of patients contacted by PCP (see note d) for Wales, England and Scotland or percentages of patients contacted directly by a registry; excl. non-accessible patients due to death or no patient addresses (all other jurisdictions). <sup>f</sup>Percentages of patient responses. <sup>g</sup>Data obtained from registries instead in N Ireland and Denmark. <sup>h</sup>Data not collected in this jurisdiction. <sup>i</sup>Denominator = total number of forwarded cases excl. patients not included in analytic sample in Ontario. <sup>j</sup>Denominator r = total number of analysed cases excl. patients from Sweden. <sup>k</sup>Denominator = total number of analysed cases excl. patients from Sweden. Manitoba & N Ireland

### *Baseline characteristics*

Patient characteristics are detailed in Table 2. The cohort was predominantly White (95%), median age 70 years (IQR 64,75) with 82% reporting 'low' levels of education. Norway provided stage data classified as local, regional and distant which could not be converted to TNM stage data.

Ontario was the only jurisdiction with more female (65%) than male respondents. While self-reported health differed significantly, with Welsh patients (9%) reporting twice as high 'poor health' rates than English or Swedish (4%) and eight-fold that of Manitoba (2%), there was no difference in self-reported comorbidity rates. Even after the exclusion of Victoria, there was significant variation in early Stage (I/II) disease which ranged from 25% (Wales) to 59% (Ontario) and surgical resection rates which varied from 27% (Wales) to 58% (Ontario) (Table 2).

**Table 2.** The characteristics of eligible patients by jurisdictions and overall

|                                                                                              | Wales<br>(N=211) | England<br>(N=252) | Scotland<br>(N=198) | N Ireland<br>(N=200) | Denmark<br>(N=285) | Manitoba<br>(N=202) | Ontario<br>(N=288) | Sweden<br>(N=211) | Norway<br>(N=88) | Victoria<br>(N=208) | Overall<br>(N=2143) | p-value <sup>6</sup>                          |
|----------------------------------------------------------------------------------------------|------------------|--------------------|---------------------|----------------------|--------------------|---------------------|--------------------|-------------------|------------------|---------------------|---------------------|-----------------------------------------------|
| Date of diagnosis of first patient                                                           | 03/04/2013       | 28/01/2013         | 26/04/2013          | 22/01/2013           | 16/05/2013         | 10/10/2012          | 08/10/2013         | 01/10/2013        | 16/01/2014       | 08/01/2013          | 10/10/2012          |                                               |
| Date of diagnosis of last patient                                                            | 25/09/2014       | 14/08/2013         | 04/12/2013          | 02/12/2014           | 13/11/2013         | 27/03/2015          | 01/10/2014         | 30/05/2014        | 21/01/2015       | 28/12/2014          | 27/03/2015          |                                               |
| Interval from diagnosis date of first patient to last patient in months (recruitment period) | 18               | 7                  | 7                   | 23                   | 6                  | 30                  | 12                 | 8                 | 12               | 24                  | 30                  |                                               |
| Median (range) interval diagnosis to questionnaire completion in months                      | 5 (0.6,9)        | 5 (3,9)            | 5 (1,9)             | 4 (0.1,9)            | 5 (2,8)            | 6 (4,9)             | 6 (4,9)            | 4 (3,8)           | 7 (5,9)          | 5 (0.2,8)           | 5 (0.1,9)           |                                               |
| <b>Age</b> years                                                                             |                  |                    |                     |                      |                    |                     |                    |                   |                  |                     |                     |                                               |
| Median (IQR)                                                                                 | 71 (65, 77)      | 71 (65, 77)        | 70 (64, 76)         | 69 (62, 75)          | 70 (63, 74)        | 70 (63, 77)         | 70 (64, 75)        | 70 (63, 75)       | 69 (64, 73)      | 68 (63, 73)         | 70 (64, 75)         | 0.010 <sup>1</sup>                            |
| <b>Sex</b> n(%)                                                                              |                  |                    |                     |                      |                    |                     |                    |                   |                  |                     |                     |                                               |
| Male                                                                                         | 127(60)          | 134(53)            | 100(51)             | 105(53)              | 151(53)            | 100(50)             | 131(45)            | 111(53)           | 46(52)           | 112(54)             | 1117(52)            | 0.159 <sup>2</sup>                            |
| <b>Health State</b> n(%)                                                                     |                  |                    |                     |                      |                    |                     |                    |                   |                  |                     |                     |                                               |
| Good                                                                                         | 135(64)          | 176(70)            | 131(66)             | 126(63)              | 190(67)            | 156(77)             | 220(76)            | 152(72)           | 50(57)           | 163(78)             | 1499(70)            | <0.001* <sup>1</sup><br><0.001** <sup>2</sup> |
| Fair                                                                                         | 55(26)           | 59(23)             | 52(26)              | 51(26)               | 62(22)             | 41(20)              | 47(16)             | 49(23)            | 32(36)           | 33(16)              | 481(22)             |                                               |
| Poor                                                                                         | 20(9)            | 11(4)              | 14(7)               | 16(8)                | 18(6)              | 4(2)                | 16(6)              | 9(4)              | 6(7)             | 10(5)               | 124(6)              |                                               |
| Missing                                                                                      | 1(0.5)           | 6(2)               | 1(0.5)              | 7(4)                 | 15(5)              | 1(0.5)              | 5(2)               | 1(0.5)            | 0(0)             | 2(1)                | 39(2)               |                                               |
| <b>Comorbidity</b> <sup>3</sup> n(%)                                                         |                  |                    |                     |                      |                    |                     |                    |                   |                  |                     |                     |                                               |
| No                                                                                           | 92(44)           | 113(45)            | 98(49)              | 82(41)               | 111(39)            | 101(50)             | 136(47)            | 114(54)           | 35(40)           | 98(47)              | 980(46)             | 0.029* <sup>1</sup><br>0.032** <sup>2</sup>   |
| Medium                                                                                       | 111(53)          | 129(51)            | 92(46)              | 103(52)              | 157(55)            | 93(46)              | 132(46)            | 87(41)            | 48(55)           | 100(48)             | 1052(49)            |                                               |
| High                                                                                         | 7(3)             | 9(4)               | 8(4)                | 15(8)                | 11(4)              | 6(3)                | 18(6)              | 6(3)              | 5(6)             | 8(4)                | 93(4)               |                                               |
| Missing                                                                                      | 1(0.5)           | 1(0.4)             | 0(0)                | 0(0)                 | 6(2)               | 2(1)                | 2(0.7)             | 4(2)              | 0(0)             | 2(1)                | 18(0.8)             |                                               |
| <b>Education</b> n(%)                                                                        |                  |                    |                     |                      |                    |                     |                    |                   |                  |                     |                     |                                               |
| Low                                                                                          | 172(82)          | 217(86)            | 174(88)             | 166(83)              | 232(81)            | 170(84)             | 224(78)            | 159(75)           | 65(74)           | 181(87)             | 1760(82)            | <0.001* <sup>1</sup><br><0.001** <sup>2</sup> |
| High                                                                                         | 11(5)            | 15(6)              | 11(6)               | 17(9)                | 15(5)              | 21(10)              | 55(19)             | 48(23)            | 14(16)           | 24(12)              | 231(11)             |                                               |

|                                            | Wales<br>(N=211) | England<br>(N=252) | Scotland<br>(N=198) | N Ireland<br>(N=200) | Denmark<br>(N=285) | Manitoba<br>(N=202) | Ontario<br>(N=288) | Sweden<br>(N=211) | Norway<br>(N=88)    | Victoria<br>(N=208) | Overall<br>(N=2143) | p-value <sup>6</sup>                              |
|--------------------------------------------|------------------|--------------------|---------------------|----------------------|--------------------|---------------------|--------------------|-------------------|---------------------|---------------------|---------------------|---------------------------------------------------|
| Missing                                    | 28(13)           | 20(8)              | 13(7)               | 17(9)                | 38(13)             | 11(5)               | 9(3)               | 4(2)              | 9(10)               | 3(1)                | 152(7)              |                                                   |
| <b>Ethnicity n(%)</b>                      | 205(97)          | 249(99)            | 197(99)             | 196(98)              | 267(94)            | 173(86)             | 261(91)            | n/a               | 87(99)              | 199(96)             | 1834(95)            | <0.001* <sup>2</sup>                              |
| White                                      |                  |                    |                     |                      |                    |                     |                    |                   |                     |                     |                     | <0.001** <sup>2</sup>                             |
| Asian                                      | 1(0.5)           | 0(0)               | 1(0.5)              | 0(0)                 | 0(0)               | 12(6)               | 21(7)              | n/a               | 1(1)                | 6(3)                | 41(2)               |                                                   |
| Black                                      | 0(0)             | 1(0.4)             | 0(0)                | 0(0)                 | 1(0.4)             | 0(0)                | 1(0.3)             | n/a               | 0(0)                | 0(0)                | 3(0.2)              |                                                   |
| Other                                      | 0(0)             | 0(0)               | 0(0)                | 0(0)                 | 0(0)               | 15(7)               | 2(0.7)             | n/a               | 0(0)                | 0(0)                | 17(0.9)             |                                                   |
| Missing                                    | 5(2)             | 2(0.8)             | 0(0)                | 4(2)                 | 17(6)              | 2(1)                | 3(1)               | n/a               | 0(0)                | 3(1)                | 36(2)               |                                                   |
| <b>Smoking n(%)</b>                        | 13(6)            | 18(7)              | 12(6)               | 19(10)               | 15(5)              | 22(11)              | 31(11)             | 41(19)            | 11(13)              | 33(16)              | 215(10)             | <0.001* <sup>2</sup>                              |
| Never                                      |                  |                    |                     |                      |                    |                     |                    |                   |                     |                     |                     | <0.001** <sup>2</sup>                             |
| Currently                                  | 19(9)            | 28(11)             | 26(13)              | 41(21)               | 58(20)             | 24(12)              | 29(10)             | 29(14)            | 11(13)              | 9(4)                | 274(13)             |                                                   |
| In the past                                | 174(82)          | 204(81)            | 160(81)             | 137(69)              | 205(72)            | 156(77)             | 225(78)            | 139(66)           | 66(75)              | 165(79)             | 1631(76)            |                                                   |
| Missing                                    | 5(2)             | 2(0.8)             | 0(0)                | 3(2)                 | 7(2)               | 0(0)                | 3(1)               | 2(0.9)            | 0(0)                | 1(0.5)              | 23(1)               |                                                   |
| <b>Tumour stage – TNM n(%)</b>             | 26(12)           | 68(27)             | 49(25)              | 42(21)               | 74(26)             | 83(41)              | 133(46)            | 59(28)            | 3(3)                | 124(60)             | 661(31)             | <0.001* <sup>1</sup><br><0.001** <sup>2</sup>     |
| I                                          |                  |                    |                     |                      |                    |                     |                    |                   |                     |                     |                     |                                                   |
| II                                         | 27(13)           | 36(14)             | 32(16)              | 33(17)               | 26(9)              | 19(9)               | 38(13)             | 11(5)             | 5(6)                | 47(23)              | 274(13)             |                                                   |
| III                                        | 64(30)           | 57(23)             | 56(28)              | 59(30)               | 84(29)             | 48(24)              | 54(19)             | 40(19)            | 5(6)                | 19(9)               | 486(23)             |                                                   |
| IV                                         | 62(29)           | 80(32)             | 50(25)              | 62(31)               | 94(33)             | 48(24)              | 54(19)             | 94(45)            | 3(3)                | 13(6)               | 560(26)             |                                                   |
| Missing                                    | 32(15)           | 11(4)              | 11(6)               | 4(2)                 | 7(2)               | 4(2)                | 9(3)               | 7(3)              | 72(82) <sup>4</sup> | 5(2)                | 162(8)              |                                                   |
| <b>Tumour stage – TNM<sup>5</sup> n(%)</b> | 53(25)           | 104(41)            | 81(41)              | 75(38)               | 100(35)            | 102(51)             | 171(59)            | 70(33)            | 8(9)                | 171(82)             | 764(39)             | <0.001* <sup>2,5</sup><br><0.001** <sup>2,5</sup> |
| I/II                                       |                  |                    |                     |                      |                    |                     |                    |                   |                     |                     |                     |                                                   |
| III/IV                                     | 126(60)          | 137(54)            | 106(54)             | 121(61)              | 178(62)            | 96(48)              | 108(38)            | 134(64)           | 8(9)                | 32(15)              | 1014(52)            |                                                   |
| Missing                                    | 32(15)           | 11(4)              | 11(6)               | 4(2)                 | 7(2)               | 4(2)                | 9(3)               | 7(3)              | 72(82)              | 5(2)                | 157(8)              |                                                   |
| <b>Treatment Surgery n(%)</b>              | 57(27)           | 107(42)            | 84(42)              | 65(33)               | 81(28)             | 113(56)             | 168(58)            | 65(31)            | 36(41)              | 199(96)             | 975(45)             | <0.001* <sup>2,5</sup><br><0.001** <sup>2,5</sup> |
| Yes                                        |                  |                    |                     |                      |                    |                     |                    |                   |                     |                     |                     |                                                   |
| No                                         | 61(29)           | 56(22)             | 55(28)              | 94(47)               | 90(32)             | 44(22)              | 111(39)            | 79(37)            | 28(32)              | 5(2)                | 623(29)             |                                                   |
| Missing                                    | 93(44)           | 89(35)             | 59(30)              | 41(21)               | 114(40)            | 45(22)              | 9(3)               | 67(32)            | 24(27)              | 4(2)                | 545(25)             |                                                   |
| <b>Treatment Chemo n(%)</b>                | 105(50)          | 125(50)            | 98(49)              | 93(47)               | 159(56)            | 93(46)              | 107(37)            | 133(63)           | 50(57)              | 63(30)              | 1026(48)            | <0.001* <sup>2,5</sup><br><0.001** <sup>2,5</sup> |
| Yes                                        |                  |                    |                     |                      |                    |                     |                    |                   |                     |                     |                     |                                                   |
| No                                         | 41(19)           | 51(20)             | 46(23)              | 65(33)               | 45(16)             | 62(31)              | 172(60)            | 37(18)            | 18(20)              | 137(66)             | 674(32)             |                                                   |
| Missing                                    | 65(31)           | 76(30)             | 54(27)              | 42(21)               | 81(28)             | 47(23)              | 9(3)               | 41(19)            | 20(23)              | 8(4)                | 443(21)             |                                                   |
| <b>Treatment Radio n(%)</b>                | 82(39)           | 68(27)             | 76(38)              | 72(36)               | 114(40)            | 81(40)              | 98(34)             | 70(33)            | 41(47)              | 29(14)              | 731(34)             | <0.001* <sup>2,5</sup><br><0.001** <sup>2,5</sup> |
| Yes                                        |                  |                    |                     |                      |                    |                     |                    |                   |                     |                     |                     |                                                   |
| No                                         | 50(24)           | 72(29)             | 50(25)              | 77(39)               | 69(24)             | 71(35)              | 180(63)            | 69(33)            | 22(25)              | 155(75)             | 815(38)             |                                                   |
| Missing                                    | 79(37)           | 112(44)            | 72(36)              | 51(26)               | 102(36)            | 50(25)              | 10(3)              | 72(34)            | 25(28)              | 24(12)              | 597(28)             |                                                   |
| <b>Treatment Other n(%)</b>                | 10(5)            | 14(6)              | 14(7)               | 11(6)                | 30(11)             | 18(9)               | 9(3)               | 0(0)              | 7(8)                | 16(8)               | 129(6)              | <0.001* <sup>2,5</sup><br><0.001** <sup>2,5</sup> |
| Yes                                        |                  |                    |                     |                      |                    |                     |                    |                   |                     |                     |                     |                                                   |

1  
2  
3  
4  
5  
6  
7  
8  
9  
10  
11  
12  
13  
14  
15  
16  
17  
18  
19  
20  
21  
22  
23  
24  
25  
26  
27  
28  
29  
30  
31  
32  
33  
34  
35  
36  
37  
38  
39  
40  
41  
42  
43  
44  
45  
46

|         | <b>Wales<br/>(N=211)</b> | <b>England<br/>(N=252)</b> | <b>Scotland<br/>(N=198)</b> | <b>N Ireland<br/>(N=200)</b> | <b>Denmark<br/>(N=285)</b> | <b>Manitoba<br/>(N=202)</b> | <b>Ontario<br/>(N=288)</b> | <b>Sweden<br/>(N=211)</b> | <b>Norway<br/>(N=88)</b> | <b>Victoria<br/>(N=208)</b> | <b>Overall<br/>(N=2143)</b> | <b>p-value<sup>6</sup></b> |
|---------|--------------------------|----------------------------|-----------------------------|------------------------------|----------------------------|-----------------------------|----------------------------|---------------------------|--------------------------|-----------------------------|-----------------------------|----------------------------|
| No      | 48(23)                   | 63(25)                     | 45(23)                      | 69(35)                       | 255(89)                    | 3(1)                        | 261(91)                    | 0(0)                      | 2(2)                     | 138(66)                     | 884(41)                     |                            |
| Missing | 153(72)                  | 175(69)                    | 139(70)                     | 120(60)                      | 0(0)                       | 181(90)                     | 18(6)                      | 211(100)                  | 79(90)                   | 54(26)                      | 1130(53)                    |                            |

<sup>1</sup>Differences between jurisdictions were tested by the Kruskal-Wallis test, <sup>2</sup>Differences between jurisdictions were tested by the Pearson’s Chi<sup>2</sup> test, <sup>3</sup>Comorbidity coded as none=no reported, medium=1-2 reported and high=3+ reported, <sup>4</sup>This included cases which could not be mapped as they were classified as per Cancer Registry of Norway into local (stage I), regional (stage II-III) and distant (stage IV) <sup>5</sup>Excluding Victoria, <sup>6</sup>Excluding Norway, \*Missing category is excluded, \*\*Missing category is included, Abbreviations: IQR=inter-quartile range.

For peer review only

1  
2  
3  
4  
5 *Routes to diagnosis*

6 Results are detailed in Table 3. Over half (55%) were diagnosed following presentation to the  
7 PCP of whom 63% (range: 29% Norway - 82% Wales; data not shown) were urgently referred  
8 with a suspicion of cancer, based on the PCP questionnaire.  
9  
10  
11  
12  
13  
14  
15  
16  
17  
18  
19  
20  
21  
22  
23  
24  
25  
26  
27  
28  
29  
30  
31  
32  
33  
34  
35  
36  
37  
38  
39  
40  
41  
42  
43  
44  
45  
46  
47  
48  
49  
50  
51  
52  
53  
54  
55  
56  
57  
58  
59  
60

For peer review only

**Table 3.** Routes to diagnosis of lung cancer patients for each jurisdiction. All figures are n(%) unless otherwise stated.

|                                                                                            | Wales<br>(N=211) | England<br>(N=252) | Scotland<br>(N=198) | N Ireland<br>(N=200) | Denmark<br>(N=285) | Manitoba<br>(N=202) | Ontario<br>(N=288) | Sweden<br>(N=211) | Norway<br>(N=88) | Victoria<br>(N=208) | Total<br>(N=2143) |
|--------------------------------------------------------------------------------------------|------------------|--------------------|---------------------|----------------------|--------------------|---------------------|--------------------|-------------------|------------------|---------------------|-------------------|
| Symptoms prompting visit to PCP                                                            | 109(52)          | 150(60)            | 128(65)             | 131(66)              | 170(60)            | 101(50)             | 91(32)             | 65(31)            | 35(40)           | 106(51)             | 1086(51)          |
| Symptoms prompting emergency (A&E) department visit <sup>1</sup>                           | 11(5)            | 18(7)              | 12(6)               | 22(11)               | 21(7)              | 25(12)              | 39(14)             | 18(9)             | 3(3)             | 6(3)                | 175(8)            |
| Symptoms prompting visit to PCP and emergency (A&E) department <sup>1</sup>                | 10(5)            | 4(2)               | 7(4)                | 18(9)                | 8(3)               | 15(7)               | 12(4)              | 8(4)              | 5(6)             | 3(1)                | 90(4)             |
| Incidental diagnosis in course of investigation/treatment for another problem <sup>2</sup> | 68(32)           | 37(15)             | 36(18)              | 19(10)               | 55(19)             | 57(28)              | 116(40)            | 107(51)           | 32(36)           | 90(43)              | 617(29)           |
| Unknown routes to diagnosis <sup>3</sup>                                                   | 10(5)            | 17(7)              | 11(6)               | 5(3)                 | 16(6)              | 4(2)                | 14(5)              | 11(5)             | 8(9)             | 0(0)                | 96(5)             |
| Other <sup>4</sup>                                                                         | 3(1)             | 25(10)             | 3(2)                | 4(2)                 | 14(5)              | 0(0)                | 16(6)              | 2(1)              | 5(6)             | 3(1)                | 75(3)             |
| Missing                                                                                    | 0(0)             | 1(0.4)             | 1(0.5)              | 1(0.5)               | 1(0.4)             | 0(0)                | 0(0)               | 0(0)              | 0(0)             | 0(0)                | 4(0.2)            |

<sup>1</sup> Emergency (A&E) route was ascribed when the patient reported pathway to cancer diagnosis involving going or being taken to the emergency department or the PCP reported that the patient presented to emergency department with or without their involvement <sup>2</sup> this could be by PCP, another doctor or via hospital; <sup>3</sup> includes cases where PCP or patient reported routes to diagnosis as 'Other' or 'Missing' but also reported symptoms or duration of symptoms, or date of first symptom, or waiting time for PCP appointment; <sup>4</sup> includes cases where PCP or patient reported routes to diagnosis as 'Other' and hasn't reported any symptoms or duration of symptoms, or date of first symptom, or waiting time for PCP appointment.

#### *Symptoms prompting visit to physician*

The median number of patient-reported symptoms were 2 (IQR 1,3). Across jurisdictions, the most common patient-reported symptoms were persistent cough (39%), breathlessness (37%) and fatigue (27%) although there was significant variation in proportion of patients presenting with individual symptoms (Table 4).

The PCPs reported a median of 1 (IQR 1,2) symptom at first presentation, with the most common being persistent cough (39%). Across jurisdictions, the reporting of other symptoms by the PCP was significantly lower compared to patients, especially fatigue (4%) and weight loss (8%). When the analysis was restricted to the cohort where both patient and PCP had completed the survey, this difference persisted. Unlike patients, there was minimal variation in PCP reporting of symptoms, with significant differences limited to 'no symptoms', 'other symptoms not previously listed' and weight loss. Overall 64% of symptoms were labelled as 'cancer specific' by the study PCPs (Table 4).

**Table 4.** Symptoms experienced by patients and presenting symptoms noted by PCP for eligible patients. All figures are n(%)

|                                              | Wales   | England | Scotland | N Ireland | Denmark | Manitoba | Ontario | Sweden  | Norway | Victoria | Overall  | p <sup>1</sup>     |
|----------------------------------------------|---------|---------|----------|-----------|---------|----------|---------|---------|--------|----------|----------|--------------------|
| <b>Symptoms (reported by patient)</b>        | (N=211) | (N=252) | (N=198)  | (N=200)   | (N=285) | (N=202)  | (N=288) | (N=211) | (N=88) | (N=208)  | (N=2143) |                    |
| persistent cough                             | 113(54) | 123(49) | 97(49)   | 83(42)    | 97(34)  | 71(35)   | 125(43) | 84(40)  | 10(11) | 39(19)   | 842(39)  | <0.001             |
| breathlessness                               | 109(52) | 126(50) | 82(41)   | 73(37)    | 99(35)  | 63(31)   | 119(41) | 77(36)  | 12(14) | 24(12)   | 784(37)  | <0.001             |
| fatigue                                      | 75(36)  | 79(31)  | 64(32)   | 61(31)    | 38(13)  | 55(27)   | 92(32)  | 60(28)  | 17(19) | 42(20)   | 583(27)  | <0.001             |
| weight loss                                  | 38(18)  | 39(15)  | 44(22)   | 37(19)    | 41(14)  | 29(14)   | 36(13)  | 34(16)  | 9(10)  | 20(10)   | 327(15)  | 0.147              |
| felt sick /vomiting /nausea/loss of appetite | 42(20)  | 33(13)  | 31(16)   | 24(12)    | 33(12)  | 22(11)   | 45(16)  | 28(13)  | 3(3)   | 20(10)   | 281(13)  | 0.132              |
| coughing up blood-stained phlegm (sputum)    | 35(17)  | 32(13)  | 24(12)   | 31(16)    | 21(7)   | 16(8)    | 27(9)   | 25(12)  | 5(6)   | 23(11)   | 239(11)  | 0.014              |
| chest or shoulder pain                       | 23(11)  | 9(4)    | 18(9)    | 24(12)    | 10(4)   | 28(14)   | 43(15)  | 25(12)  | 4(5)   | 22(11)   | 206(10)  | <0.001             |
| other symptoms not listed above              | 51(24)  | 80(32)  | 59(30)   | 54(27)    | 63(22)  | 40(20)   | 30(10)  | 75(36)  | 26(30) | 42(20)   | 520(24)  | <0.001             |
| no symptoms                                  | 29(14)  | 24(10)  | 32(16)   | 21(11)    | 63(22)  | 50(25)   | 67(23)  | 36(17)  | 33(38) | 75(36)   | 430(20)  | <0.001             |
| missing                                      | 1(0.5)  | 16(6)   | 6(3)     | 17(9)     | 31(11)  | 9(4)     | 4(1)    | 4(2)    | 12(14) | 1(0.5)   | 101(5)   | <0.001             |
| <b>Presenting symptom (reported by PCP)</b>  | (N=85)  | (N=133) | (N=115)  | (N=0)     | (N=151) | (N=86)   | (N=61)  | (N=0)   | (N=17) | (N=81)   | (N=729)  |                    |
| persistent cough                             | 33(39)  | 57(43)  | 45(39)   | n/a       | 67(44)  | 24(28)   | 18(30)  | n/a     | 7(41)  | 33(41)   | 284(39)  | 0.093              |
| breathlessness                               | 17(20)  | 27(20)  | 20(17)   | n/a       | 27(18)  | 11(13)   | 11(18)  | n/a     | 4(24)  | 13(16)   | 130(18)  | 0.803              |
| fatigue                                      | 1(1)    | 5(4)    | 3(3)     | n/a       | 9(6)    | 2(2)     | 2(3)    | n/a     | 1(6)   | 3(4)     | 26(4)    | 0.539 <sup>2</sup> |
| weight loss                                  | 5(6)    | 9(7)    | 15(13)   | n/a       | 19(13)  | 3(3)     | 2(3)    | n/a     | 0(0)   | 5(6)     | 58(8)    | 0.027              |
| felt sick /vomiting /nausea/loss of appetite | 1(1)    | 1(0.8)  | 2(2)     | n/a       | 6(4)    | 2(2)     | 0(0)    | n/a     | 0(0)   | 0(0)     | 12(2)    | 0.418 <sup>2</sup> |
| coughing up blood-stained phlegm (sputum)    | 8(9)    | 10(8)   | 10(9)    | n/a       | 7(5)    | 2(2)     | 3(5)    | n/a     | 0(0)   | 7(9)     | 47(6)    | 0.305              |
| chest or shoulder pain                       | 8(9)    | 10(8)   | 15(13)   | n/a       | 15(10)  | 1(1)     | 7(12)   | n/a     | 1(6)   | 4(5)     | 61(8)    | 0.08               |
| other symptoms not listed above              | 24(28)  | 44(33)  | 33(29)   | n/a       | 64(42)  | 15(17)   | 7(12)   | n/a     | 7(41)  | 20(25)   | 214(29)  | <0.001             |

|                                                |        |        |        |     |        |        |        |     |        |        |         |        |
|------------------------------------------------|--------|--------|--------|-----|--------|--------|--------|-----|--------|--------|---------|--------|
| no symptoms                                    | 5(6)   | 6(5)   | 6(5)   | n/a | 2(1)   | 31(36) | 12(20) | n/a | 0(0)   | 10(12) | 72(10)  | <0.001 |
| missing                                        | 7(8)   | 7(5)   | 11(10) | n/a | 16(11) | 12(14) | 6(10)  | n/a | 2(12)  | 10(12) | 71(10)  | 0.392  |
| <b>Cancer-specificity of symptom presented</b> |        |        |        |     |        |        |        |     |        |        |         |        |
| cancer-specific symptom                        | 62(73) | 97(73) | 79(69) | n/a | 94(62) | 36(42) | 38(62) | n/a | 10(59) | 48(59) | 464(64) | <0.001 |
| non-specific symptom                           | 11(13) | 23(17) | 19(17) | n/a | 39(26) | 7(8)   | 5(8)   | n/a | 5(29)  | 13(16) | 122(17) |        |
| no symptoms /missing                           | 12(14) | 13(10) | 17(15) | n/a | 18(12) | 43(50) | 18(30) | n/a | 2(12)  | 20(25) | 143(19) |        |

<sup>1</sup> Differences between jurisdictions (excluding Victoria and Norway) were tested by the Pearson's Chi<sup>2</sup> test, if nothing else stated.

<sup>2</sup> Differences between jurisdictions (excluding Victoria and Norway) were tested by the Fisher's exact test.

### Time intervals

The observed time intervals are shown in Appendix C2 and are summarised in Figure 2. Based on overall trends, jurisdictions could be grouped into those with reduced, longer and similar intervals to Wales (Table 5). It was not possible to interpret variations observed in Norway (small sample size) and Victoria (surgical cohort). In the remaining jurisdictions, there was no difference in the median adjusted patient interval compared to Wales. Denmark had shorter median adjusted primary care interval (-11 days); Sweden had shorter (-20) and Manitoba longer (+40) diagnostic intervals compared to Wales. Denmark (-13), Manitoba (-11), England (-9) and Northern Ireland (-4) had shorter treatment intervals. The median adjusted total interval was shorter only in Denmark (Table 5, Figure 2). The differences were greater for the 90<sup>th</sup> percentile. The total interval in patients who waited longest (90<sup>th</sup> percentile) was significantly shorter in two jurisdictions (Denmark -142, England -28 days) compared to Wales.

**Table 5.** Differences in adjusted intervals (days) between Wales and the other nine jurisdictions for lung cancer patients

| Intervals                                                                    | percentiles              | Wales             | Denmark                           | Sweden         | England       | N Ireland      | Scotland                                         | Manitoba      | Ontario                          | Norway        | Victoria                                      |
|------------------------------------------------------------------------------|--------------------------|-------------------|-----------------------------------|----------------|---------------|----------------|--------------------------------------------------|---------------|----------------------------------|---------------|-----------------------------------------------|
|                                                                              |                          | Reference in days | Overall trend - shorter intervals |                |               |                | Similar with some intervals longer, some shorter |               | Overall trend - longer intervals |               | Difficult to interpret (see text for reasons) |
| Ranking by 5-year survival rates for lung cancers diagnosed in 1999-2007 [5] |                          | 10                | 6                                 | 1              | 9             | 7              | 8                                                | 3             | 2                                | 5             | 4                                             |
| Patient Interval                                                             | Number of patients       | 181               | 233                               | 172            | 213           | 179            | 169                                              | 133           | 205                              | 55            | 141                                           |
|                                                                              | 50th percentile (95% CI) | 21                | -6 (-13,0)                        | -1 (-9,8)      | -3 (-10,5)    | -3 (-13,6)     | -3 (-10,4)                                       | 1 (-8,10)     | 1 (-11,14)                       | 0 (-8,8)      | -9 (-16,-2)                                   |
|                                                                              | 75th percentile (95% CI) | 61                | -13 (-38,13)                      | -2 (-24,21)    | -2 (-42,37)   | -8 (-55,39)    | 1 (-25,27)                                       | 3 (-23,30)    | -7 (-54,39)                      | -9 (-60,42)   | -4 (-46,38)                                   |
|                                                                              | 90th percentile (95% CI) | 216               | -34 (-55,-13)                     | -1 (-25,23)    | -15 (-42,12)  | 24 (-21,70)    | 43 (7,79)                                        | -35 (-59,-10) | -34 (-66,-2)                     | 59 (21,96)    | -35 (-49,-21)                                 |
| Primary Care interval                                                        | Number of patients       | 110               | 159                               | N/A            | 147           | 124            | 119                                              | 80            | 75                               | 19            | 89                                            |
|                                                                              | 50th percentile (95% CI) | 20                | -11 (-18,-3)                      |                | -7 (-17,3)    | -5 (-15,4)     | -3 (-14,8)                                       | 7 (-8,21)     | 5 (-9,19)                        | -11 (-18,-4)  | -8 (-17,1)                                    |
|                                                                              | 75th percentile (95% CI) | 43                | -29 (-47,-12)                     | N/A            | -17 (-42,8)   | 1 (-45,48)     | -11 (-36,14)                                     | 19 (-47,85)   | 20 (-72,112)                     | -10 (-57,37)  | -12 (-70,46)                                  |
|                                                                              | 90th percentile (95% CI) | 91                | -30 (-66,7)                       |                | -39 (-85,6)   | 17 (-55,90)    | -20 (-67,25)                                     | 13 (-38,65)   | 102 (-56,258)                    | -22 (-109,66) | -19 (-89,51)                                  |
| Diagnostic interval                                                          | Number of patients       | 176               | 229                               | 165            | 212           | 170            | 173                                              | 138           | 212                              | 52            | 160                                           |
|                                                                              | 50th percentile (95% CI) | 45                | -12 (-25,1)                       | -20 (-35,-5)   | 9 (-3,21)     | 17 (-5,39)     | -4 (-16,8)                                       | 40 (14,66)    | 10 (-6,26)                       | 4 (-16,24)    | 7 (-13,27)                                    |
|                                                                              | 75th percentile (95% CI) | 108               | -45 (-52,-39)                     | -22 (-30,-15)  | -7 (-20,7)    | 12 (2,22)      | -15 (-32,1)                                      | 35 (22,48)    | 5 (-9,19)                        | -4 (-15,8)    | -2 (-8,4)                                     |
|                                                                              | 90th percentile (95% CI) | 162               | -27 (-153,99)                     | -34 (-206,138) | -14 (-100,72) | 112 (-165,389) | 31 (-81,143)                                     | 112 (32,192)  | 106 (-122,335)                   | 0 (-93,93)    | 62 (10,114)                                   |
| Treatment interval                                                           | Number of patients       | 192               | 279                               | 190            | 238           | 200            | 187                                              | 182           | 263                              | 87            | 199                                           |
|                                                                              | 50th percentile (95% CI) | 43                | -13 (-15,-11)                     | -2 (-8,3)      | -9 (-12,-5)   | -4 (-7,-2)     | 0 (-4,4)                                         | -11 (-17,-5)  | 3 (-4,10)                        | -8 (-11,-6)   | -29 (-32,-27)                                 |
|                                                                              | 75th percentile (95% CI) | 64                | -32 (-36,-28)                     | -2 (-8,4)      | -18 (-23,-13) | -13 (-18,-7)   | 1 (-7,9)                                         | -5 (-16,6)    | 6 (-2,14)                        | -13 (-19,-8)  | -33 (-41,-25)                                 |
|                                                                              | 90th percentile (95% CI) | 89                | -45 (-50,-40)                     | -10 (-17,-4)   | -28 (-36,-20) | -16 (-23,-9)   | -6 (-14,1)                                       | 4 (-5,13)     | 4 (-4,13)                        | -22 (-30,-14) | -39 (-45,-32)                                 |
| Total                                                                        | Number of patients       | 147               | 192                               | 147            | 176           | 153            | 143                                              | 117           | 178                              | 52            | 113                                           |

|          |                          |     |                  |              |                |              |               |              |                                   |                |                    |
|----------|--------------------------|-----|------------------|--------------|----------------|--------------|---------------|--------------|-----------------------------------|----------------|--------------------|
| interval | 50th percentile (95% CI) | 116 | -49 (-95,-3)     | -8 (-64,47)  | -7 (-52,38)    | -16 (-41,10) | -2 (-70,66)   | 11 (-41,63)  | 9 (-78,97)                        | -34 (-56,-12)  | -32 (-64,2)        |
|          | 75th percentile (95% CI) | 204 | -91 (-270,87)    | -17 (-40,7)  | -29 (-175,118) | 5 (-191,201) | 33 (-144,211) | 13 (-77,103) | -7 (-331,317)                     | -39 (-107,29)  | -23 (-61,14)       |
|          | 90th percentile (95% CI) | 365 | -142 (-150,-134) | -18 (-59,23) | -28 (-37,-18)  | 0 (-4,5)     | 15 (-26,55)   | 15 (-26,55)  | 0 (-78,79)                        | -84 (-119,-49) | 0 (-3,3)           |
|          |                          |     |                  |              |                |              |               |              | <b>Interval relative to Wales</b> | <b>Trends</b>  | <b>Significant</b> |
|          |                          |     |                  |              |                |              |               |              | Reduction                         |                |                    |
|          |                          |     |                  |              |                |              |               |              | Increase                          |                |                    |

The majority of patients were diagnosed between 2013-14. The differences were calculated for the 50<sup>th</sup>, 75<sup>th</sup> and 90<sup>th</sup> percentiles by setting age to its mean value and gender and comorbidity to their modes (i.e. male gender and medium comorbidity). It is not possible to interpret differences observed for Norway (due to the small sample size) and Victoria (the cohort was limited to those who had undergone surgery).

FIGURE 2

### Sensitivity and validity analyses

The estimates of routes to diagnosis, time intervals, and regression analysis trends were not significantly altered by changing the cut-off to 6 months or using only patient data (results not shown).

Appendix C3 details, which sources were used based on the standardization rules, to define dates and also how often a day in the date was imputed. With regards to the dates of first presentation to healthcare (CCC=0.91), diagnosis (CCC ≥ 0.93) and treatment (CCC=0.94), there was adequate agreement between all data sources where the data on these dates was collected. Agreement between patient versus PCP for dates of first presentation to healthcare (CCC=0.91) and diagnosis (CCC=0.93) was also adequate as was agreement between patient versus CTS for dates of diagnosis (CCC=0.94) and treatment (CCC=0.94).

Omitting time intervals which were negative or over 365 days (Appendix C4) led to change in direction of difference which was non-significant in long intervals (75<sup>th</sup> or 90<sup>th</sup> percentile) between Wales and jurisdictions in four cases: Norway and Victoria (patient interval), N Ireland (diagnostic interval), England (total interval). All other results were similar to the main results.

## Discussion

### Main findings

This is the first international study we are aware of comparing lung cancer routes and time intervals. With the exception of Denmark, in all other jurisdictions, the median total interval

1  
2  
3 from symptom onset to treatment, for respondents diagnosed in 2012-15 was similar to that  
4 of Wales, the reference. However, there were jurisdiction specific differences in patient,  
5 diagnostic and treatment intervals, especially for the 10% of patients who waited the longest.  
6  
7 Based on overall trends, jurisdictions could be grouped into those with trends of reduced,  
8 longer and similar intervals to Wales.  
9  
10

11  
12 Across jurisdictions, all symptoms other than persistent cough were less frequently reported  
13 by the PCP when compared to patients. This was especially true for fatigue and weight loss.  
14 One in four patients reported incidental diagnosis and one in ten were diagnosed following a  
15 visit to the emergency (A&E) department.  
16  
17  
18

### 19 20 21 *Strengths and weaknesses*

22 Our study helps address the shortcomings of current international comparisons across  
23 multiple national studies with significant variation in methodology including differences in  
24 definition of intervals. Strengths of our study include 1) use of the same methodology across  
25 countries 2) use of cancer registries to identify consecutive newly diagnosed patients; 3) use  
26 of standardised questionnaires; 4) inclusion of PCP and CTS questionnaires enriched by  
27 registry data; 5) minimal data interpretation by the local teams with all data cleaning performed  
28 in a standardised manner centrally; and 6) triangulation with comprehensive data rules to  
29 ensure validity, consistency and preserve statistical precision.[21] Recall bias was minimised  
30 by the triangulation of different data sources and by patients completing the questionnaire  
31 within a limited time window (median 5 months) after the cancer diagnosis.  
32  
33  
34  
35  
36  
37  
38

39 A key limitation, as with all questionnaire-based studies was both selection and non-response  
40 bias which varied across jurisdictions and has implications for interpretation and generalisation  
41 of findings. In comparing intervals, we adjusted for age, sex and comorbidity but were unable  
42 to adjust for ethnicity and education due to different classification systems. Recall bias was  
43 minimised by the triangulation of different data sources and by patients completing the  
44 questionnaire within a limited time window (median 5 months) after the cancer diagnosis.  
45 Recruitment of patients up to 9 rather than 6 months after diagnosis might have magnified the  
46 selection bias due to high mortality.[34] However, sensitivity analysis suggests that this did  
47 not impact on the results. Categorising presenting symptoms into indicative or not was done  
48 pragmatically as existing guidelines for lung cancer investigation vary across ICBP  
49 jurisdictions.[35] In Norway and Victoria, a small sample size and restriction of eligibility to  
50 only surgical patients, respectively, made comparison difficult. Nonetheless, significant  
51 differences in these two jurisdictions compared to Wales were largely limited to the treatment  
52 interval alone.  
53  
54  
55  
56  
57  
58  
59  
60

1  
2  
3  
4  
5 There was variation in stage distribution across jurisdictions. While this may be partly related  
6 to the varying response rate, true differences in lung cancer stage have been noted on  
7 analysis of registry data of patients diagnosed between 2004-2007.[6] The high lung cancer  
8 mortality and self-selection are likely to have contributed to an over-representation of early  
9 stage disease and tumours treated with surgical resection. This suggests that true variation  
10 may well be higher than that reported in this cohort of 'healthier early stage' patients.  
11  
12  
13  
14

### 15 16 *Comparison to other studies*

17 The most common patient-reported symptoms, in keeping with the literature, were persistent  
18 cough, breathlessness, fatigue and weight loss, with one in five reporting 'no symptoms'. [18]  
19 Only a minority (11%) of our respondents reported coughing blood or bloody sputum/spit,  
20 which is the only consistent predictor of lung cancer.[36] While haemoptysis was reported in  
21 a prospective survey (England 2011-12) by 22% of lung cancer patients identified through  
22 respiratory clinics, it was a presenting symptom in only 5% of cases.[11]  
23  
24  
25  
26  
27

28 The median number of symptoms reported by patients was more than that reported by the  
29 PCP in all jurisdictions. This was especially so for fatigue and weight loss. A number of factors  
30 could have contributed to this - patients not listing all symptoms at presentation, patients  
31 having a different understanding/recall of their symptoms post diagnosis, PCPs only recording  
32 key symptoms such as cough. Further research on under reporting of systemic symptoms  
33 such as fatigue and weight loss is warranted.  
34  
35  
36  
37  
38

39 As lung cancer mortality is higher in patients attending emergency (A&E) departments, the  
40 rates are often compared in an attempt to understand international survival differences.[37]  
41 The rate of respondents who attended A&E varied two-fold across jurisdictions from 9-10% in  
42 England, Scotland and Denmark to 18-20% in Northern Ireland, Ontario and Manitoba. While  
43 rates for Scotland (10%) were similar to that reported in a prospective Scottish audit (11.5%),  
44 as were rates for Denmark (7% vs 6.3% when PCP not involved), rates for England (9%) were  
45 lower than those reported in population based audits (25%) reflecting non-response  
46 bias.[14,15] In Victoria (4%) restriction of the cohort to surgical patients is likely to have  
47 accounted for the very low rates.  
48  
49  
50  
51  
52  
53

54  
55 Our reported median patient, primary care and diagnostic intervals are in keeping with those  
56 previously reported from the participating jurisdictions (Table 6). Minor variations in interval  
57 estimates are likely due to differences in data source, sample size and cohort  
58 characteristics.[38] Longer intervals were reported from earlier cancer cohorts - median  
59  
60

1  
2  
3 primary care interval for England of 52 days in 1998-2000 (our median 11),[13] median total  
4 interval for Denmark of 108 days in 2004-5 (our median 67) and Norway of 118 in 2002-5 (our  
5 median 79).[17-19,24]  
6  
7  
8  
9  
10  
11  
12  
13  
14  
15  
16  
17  
18  
19  
20  
21  
22  
23  
24  
25  
26  
27  
28  
29  
30  
31  
32  
33  
34  
35  
36  
37  
38  
39  
40  
41  
42  
43  
44  
45  
46  
47  
48  
49  
50  
51  
52  
53  
54  
55  
56  
57  
58  
59  
60

For peer review only

**Table 6.** Summary of literature on intervals in lung cancer patients diagnosed since 2000 in the ICBP Module 4 countries

| Study No | Ref                          | Study Period   | Jurisdiction            | Design                                                                                                                               | Patients                                                                                                                                              | No. of lung cancer patients      | Interval <sup>1</sup> (days)                                       |                         |                         |                        | Total interval          |
|----------|------------------------------|----------------|-------------------------|--------------------------------------------------------------------------------------------------------------------------------------|-------------------------------------------------------------------------------------------------------------------------------------------------------|----------------------------------|--------------------------------------------------------------------|-------------------------|-------------------------|------------------------|-------------------------|
|          |                              |                |                         |                                                                                                                                      |                                                                                                                                                       |                                  | Patient                                                            | Primary care            | Diagnostic              | Treatment              |                         |
| 1        | Walter FM et al (2015)       | 2011-2         | England, UK             | Prospective patient questionnaire survey - multi hospital cohort. Dates of diagnosis based on medical note review.                   | All attending urgent and routine respiratory clinics across the five hospitals in England aged over 40 years with symptoms suspicious of lung cancer. | 153                              | Interval from first symptom to diagnosis Median 91 (IQR 49-184)    |                         |                         |                        |                         |
| 2        | Lyratzopoulos G et al (2015) | 2009-10        | England, UK             | Prospective national audit of cancer diagnosis using primary practice patient records and continuous sampling during audit period    | All patients aged $\geq 15$ years who had first presented to a primary care practitioner and were subsequently diagnosed with one of 28 cancers       | 1128                             | Median 11 (IQR 0-32)                                               | Median 3 (IQR 14-39)    |                         |                        |                         |
| 3        | Neal R et al (2014)          | 2007-8         | UK                      | Retrospective analysis of electronic health record data from General Practice Research Database - population cohort                  | All newly diagnosed with one of 15 cancers                                                                                                            | 2851                             |                                                                    |                         | Median 112 (IQR 45-251) |                        |                         |
| 4        | Barrett J et al (2008)       | 1998-2002      | Exeter, England, UK     | Retrospective case-control review of PCP records - population cohort                                                                 | All with lung cancer aged $\geq 40$ years, identified from the hospital cancer registry and computerised searches of all primary care practices       | 247                              |                                                                    | Median 52 (IQR 7-243)   |                         |                        |                         |
| 5        | Baughan P et al (2009)       | 2005-6, 2007-8 | Scotland, UK            | Retrospective audit involving PCP review of medical records of all newly diagnosed cancer patients they had seen - population cohort | All newly diagnosed with lung cancer                                                                                                                  | 981                              | Median 9.5 (IQR 31)                                                |                         | Median 11 (IQR 28)      |                        |                         |
| 6        | Guldbrandt LM et al (2015)   | 2010           | Denmark                 | Retrospective PCP questionnaires survey of national registry-based population cohort                                                 | All consecutive newly diagnosed lung cancer patients                                                                                                  | 429-442 depending on interval    |                                                                    | Median 7 (IQR, 0-30)    | Median 29 (IQR, 12-69)  |                        |                         |
| 7        | Tørring ML et al (2013)      | 2004 - 5       | Aarhus, Denmark         | Prospective, population-based study using electronic health records and PCP survey of identified patients                            | All newly diagnosed with lung cancer after attending primary care                                                                                     | 262                              |                                                                    |                         | Median 112 (IQR 45-251) |                        |                         |
| 8        | Hansen RP et al (2011)       | 2004-5         | Aarhus, Denmark         | Retrospective PCP survey                                                                                                             | Cancer patients newly diagnosed during a 1-year period identified using administrative registry data                                                  | 128-251 (depending on interval)  | Median 28 (IQR 7-56)                                               | Median 0 (IQR 0-9)      |                         | Median 51 (IQR 27-76)  | Median 108 (IQR 82-167) |
| 9        | Bjerager M et al (2006)      | 2003           | Aarhus, Denmark         | Retrospective PCP survey using structured telephone interviews enriched with administrative registry data - population-based cohort  | All lung cancer patients identified through histological and cytological tests from county-based registers                                            | 84                               |                                                                    | Median 32.5 (IQR 12-68) |                         |                        |                         |
| 10       | Rolke HB et al (2006)        | 2002-5         | Norway (South)          | Retrospective questionnaire-based patient survey - hospital cohort                                                                   | All newly diagnosed with lung cancer                                                                                                                  | 273 -376 (depending on interval) | Median 19 (2-77)                                                   |                         |                         |                        | Median 118 (IQR 68-220) |
| 11       | Stokstad T et al (2017)      | 2011-13        | Norway                  | Retrospective medical record audit -single hospital cohort                                                                           | All cases that started diagnostic work-up and were diagnosed with lung cancer at St. Olavs Hospital, Trondheim                                        | 449                              |                                                                    |                         |                         | 42 days (range: 2-296) |                         |
| 12       | Largey G et al (2016)        | 2013           | Victoria, Australia     | Retrospective medical record audit -three hospital cohort                                                                            | Admitted with a new diagnosis of lung cancer over a three month period in three hospitals                                                             | 78                               |                                                                    |                         |                         | Mean 30.4 (SD 45.3)    |                         |
| 13       | Evans SM et al (2016)        | 2011-4         | Victoria, Australia     | Retrospective medical record audit - multi hospital cohort                                                                           | All lung cancer patients newly diagnosed in six public and two private hospitals                                                                      | 1417                             |                                                                    |                         | Median 15 (IQR, 5-36)   | Median 30 (IQR, 6-84)  |                         |
| 14       | Emery JD et al (2017)        | 2012 -4        | Western rural Australia | Prospective cluster randomised trial of symptom awareness                                                                            | Lung cancer patients newly diagnosed in the control arm of the trial                                                                                  | 167                              | Interval from first symptom to diagnosis Median 34.5 (IQR 7 103.5) |                         |                         |                        |                         |

1  
2  
3  
4  
5  
6  
7  
8  
9  
10  
11  
12  
13  
14  
15  
16  
17  
18  
19  
20  
21  
22  
23  
24  
25  
26  
27  
28  
29  
30  
31  
32  
33  
34  
35  
36  
37  
38  
39  
40  
41  
42  
43  
44  
45  
46

|    |                                  |        |                      |                                                                                                                                                                                           |                                                                                                    |      |  |           |                                                               |  |                         |
|----|----------------------------------|--------|----------------------|-------------------------------------------------------------------------------------------------------------------------------------------------------------------------------------------|----------------------------------------------------------------------------------------------------|------|--|-----------|---------------------------------------------------------------|--|-------------------------|
| 15 | Burneister BH et al (2010)       | 2000-4 | Queensland Australia | Retrospective analysis of radiation therapy waiting times                                                                                                                                 | All lung cancer patients who received radiation therapy as initial treatment at a public hospital. | 1535 |  |           |                                                               |  | Median 33 <sup>2</sup>  |
| 16 | Ellis PM and Vandermeer R (2011) | 2010   | Ontario, Canada      | Retrospective patient survey using structured telephone interviews - single centre cohort. Appointment dates and diagnostic tests verified through family doctor or patient chart review. | All lung cancer patients referred to a regional cancer centre                                      | 52   |  | Median 21 | Median 27 (IQR 0-38)                                          |  | Median 138 (IQR 79-175) |
| 17 | Lo DS et al (2007)               | 2005-7 | Ontario, Canada      | Retrospective medical record audit - multi hospital cohort                                                                                                                                | All with lung cancer seen on a newly implemented Time to Treat Program                             | 144  |  |           | Median interval from suspicion of lung cancer to diagnosis 37 |  |                         |

<sup>1</sup> Intervals as defined in Figure 1; <sup>2</sup> Limited to patients receiving radiation treatment

1  
2  
3  
4  
5 Across all jurisdictions, there was no significant difference in primary care intervals for the 10%  
6 of patients with longest interval. It is likely that these patients had vague or non-specific  
7 symptoms and signs. Referral guidelines for suspected lung cancer do not always favour  
8 patients with early symptoms and often prioritise those with more advanced disease.[39]  
9 Access to better diagnostic tools such as low-dose CT chest in the primary care setting may  
10 favour this group of patients.[40] It would be useful in future projects to explore whether such  
11 access may have contributed to the improved 1-year lung cancer survival rates reported from  
12 Australia and Canada.[6]  
13  
14  
15  
16  
17  
18

19 Diagnostic intervals were significantly longer for Manitoba compared to other jurisdictions and  
20 twice that reported in an ongoing local PCP audit (personal communication). While one might  
21 suspect overestimation due to differences in the source of date of first presentation, between  
22 our study (in almost half, it was derived from patients) and local audit, this is less likely as the  
23 concordance coefficient between PCP and patient derived data at Manitoba was 0.94.  
24  
25  
26  
27  
28

29 Observed median treatment intervals were below 6 weeks for nearly all jurisdictions. This was  
30 the only interval where there were significant differences between jurisdictions with Denmark,  
31 England, Norway and Northern Ireland all having shorter adjusted treatment intervals across  
32 all percentiles, with larger differences for the 75<sup>th</sup> and 90<sup>th</sup> percentile. These improvements  
33 may reflect implementation of waiting time targets in Denmark (35-38 days from first  
34 consultation depending on treatment modality) and the UK (31 days from decision to  
35 treat).[41,42] The shorter treatment intervals in Norway are in keeping with long-standing  
36 provision of standardized cancer care pathways and effective coordination between primary  
37 care and treatment centers. While a systematic review did not find evidence to support an  
38 association between intervals and lung cancer outcomes, increasing mortality with longer  
39 diagnostic intervals was noted in a more recent, high-quality study.[16] In 2000, O'Rourke  
40 reported median intervals of 94 days (35-187) between the first hospital visit and starting  
41 treatment resulting in 21% of potentially curable patients becoming incurable.[43] Others have  
42 found metabolic evidence on PET/CT of pre-treatment disease progression in 21% and TNM  
43 upstaging in 18% of small-cell lung cancer patients after a relatively short median inter-scan  
44 interval of 43 days.[44] Long intervals can also result in deterioration in performance status.  
45 More recently, there is concern that the need for genotyping may result in further increase in  
46 time to treatment.  
47  
48  
49  
50  
51  
52  
53  
54  
55  
56  
57

58 The shorter total interval in Denmark likely reflects the significant reductions in cancer waiting  
59 times following a collaborative effort to set-up and implement a national centralised quality  
60

1  
2  
3 management system, the Danish Cancer Patient Pathways (CPPs). The latter includes PCP  
4 access to fast-track diagnostic work-up.[45]. The findings are in keeping with higher relative  
5 survival and lower mortality in Denmark among symptomatic cancer patients diagnosed  
6 through primary care after the implementation of CPPs and with the accelerated increase in  
7 5-year survival among Danish lung cancer patients diagnosed in 2010-2014 when compared  
8 to patients from earlier time periods.[46] While there is some inherent lead-time bias, the  
9 findings highlight the importance and feasibility of a timely diagnosis of lung cancer.  
10  
11  
12  
13  
14

### 15 16 *Conclusions*

17 The study provides for the first time, robust data, collected through consistent methods in all  
18 jurisdictions, allowing for detailed comparisons of key diagnostic intervals in lung cancer and  
19 routes to diagnosis. While all jurisdictions except Denmark, had similar median adjusted  
20 total intervals, there were jurisdiction-specific significant differences in patient, diagnostic  
21 and treatment intervals, especially for the 10% of patients who waited the longest. The  
22 proportion of patients diagnosed following presentation to the PCP ranged from 35-75%.  
23 These data could help individual jurisdictions to better target their efforts to reduce time to  
24 treatment and ultimately improve patient experience and outcomes in lung cancer.’  
25  
26

27 Intervals and pathways are ultimately of interest as they relate to prognosis. A further analysis  
28 which includes all four cancers (lung, ovary, colon and breast) surveyed in ICBP4 module and  
29 explores the impact of these intervals on stage and 1-year survival is underway.  
30  
31  
32  
33  
34

### 35 **List of abbreviations**

36 ICBP M4 – International Cancer Benchmarking Partnership Module 4

37 PCP – Primary Care Physician

38 CTS – Cancer Treatment Specialist

39 CPP – Danish Cancer Patient Pathways  
40  
41  
42  
43  
44

### 45 **Figure headings**

46 Figure 1: Time intervals from onset of symptoms to start of treatment based on the Aarhus  
47 Statement  
48

49 Figure 2: Differences in 50th, 75th and 90th centiles of the intervals (days) between Wales as the  
50 reference and the other nine jurisdictions. The data are adjusted for differences in age, gender and  
51 comorbidity. The bars in black show significant differences in intervals.  
52  
53

### 54 **Acknowledgement**

55 We are grateful to Catherine Foot, Martine Bomb, Brad Groves of Cancer Research UK for  
56 managing the programme. The ICBP Module 4 Working Group (below) for their support and  
57 work keeping the study going. Christian Finley (Canada), David Baldwin (England) for  
58 reviewing the manuscript. Stefan Bergström, Jan Willem Coebergh, Jon Emery, Monique E  
59  
60

1  
2  
3 van Leerdam, Marie-Louise Essink-Bot and Una MacLeod (the ICBP M4 Academic Reference  
4 Group) for providing independent peer review of the study protocol and analysis plan  
5 development. We thank all the patients, primary care physicians, cancer treatment specialists,  
6 and registry staff of all jurisdictions who took part in this study, and also the Danish Lung  
7 Cancer Registry for providing clinical information for the study.  
8  
9

#### 10 **ICBP Module 4 Working Group**

11 Alina Zalounina Falborg, (Research Unit for General Practice, Department of Public Health,  
12 Aarhus University), Andriana Barisic (Department of Prevention and Cancer Control, Cancer  
13 Care Ontario), Anna Gavin (Northern Ireland Cancer Registry, Centre for Public Health,  
14 Queen's University Belfast), Anne Kari Knudsen (European Palliative Care Research Centre  
15 (PRC), Department of Oncology, Oslo University Hospital and Institute of Clinical Medicine),  
16 Breann Hawryluk (Department of Patient Navigation, Cancer Care Manitoba), Chantelle  
17 Anandan (Centre for Population Health Sciences, University of Edinburgh), Conan Donnelly  
18 (Centre for Public Health, Queen's University Belfast), David H Brewster, Scottish Cancer  
19 Registry, Information Services Division, NHS National Services Scotland, David Weller  
20 (Centre for Population Health Sciences, University of Edinburgh), Donna Turner (Population  
21 Oncology, Cancer Care Manitoba), Elizabeth Harland (Department of Epidemiology and  
22 Cancer Registry, CancerCare Manitoba), Eva Grunfeld (Knowledge Translation Research  
23 Network Health Services Research Program, Ontario Institute for Cancer Research;  
24 Professor and Vice Chair Research Department of Family and Community Medicine,  
25 University of Toronto), Evangelia Ourania Fourkala (Gynaecological Cancer Research  
26 Centre, Women's Cancer, Institute for Women's Health, University College London), Henry  
27 Jensen (Research Unit for General Practice, Department of Public Health, Aarhus  
28 University), Irene Reguilon (International Cancer Benchmarking Partnership, Cancer  
29 Research UK), Jackie Boylan (Centre for Public Health, Queen's University Belfast),  
30 Jacqueline Kelly (Northern Ireland Cancer Registry, Centre for Public Health, Queen's  
31 University Belfast), Jatinderpal Kalsi (Gynaecological Cancer Research Centre, Women's  
32 Cancer, Institute for Women's Health, University College London), John Butler (The Royal  
33 Marsden) Kerry Moore, Centre for Public Health, Queen's University Belfast, Martin  
34 Malmberg (Department of Oncology, Lund University Hospital), Mats Lambe (Regional  
35 Cancer Center Uppsala and Department of Medical Epidemiology and Biostatistics, Karolinska  
36 Institutet), Oliver Bucher (Department of Epidemiology and Cancer Registry, CancerCare  
37 Manitoba), Peter Vedsted, Research Unit for General Practice, Department of Public Health,  
38 Aarhus University, Rebecca-Jane Law (North Wales Centre for Primary Care Research,  
39 Bangor University), Rebecca Bergin (Centre for Behavioural Research in Cancer;  
40 Department of General Practice, University of Melbourne), Richard D Neal (North Wales  
41 Centre for Primary Care Research, Bangor University; Academic Unit of Primary Care,  
42 Leeds Institute of Health Sciences, University of Leeds), Samantha Harrison, Early  
43 Diagnosis and International Cancer Benchmarking Partnership, Policy and Information,  
44 Cancer Research UK, Sigrun Saur Almberg (Department of Cancer Research and Molecular  
45 Medicine, Faculty of Medicine, Norwegian University of Science and Technology (NTNU),  
46 Therese Kearney (Northern Ireland Cancer Registry, Centre for Public Health, Queen's  
47 University Belfast), Victoria Cairnduff (Northern Ireland Cancer Registry, Centre for Public  
48 Health, Queen's University Belfast), Victoria Hammersley (Centre for Population Health  
49 Sciences, University of Edinburgh), Victoria White (Centre for Behavioural Research in  
50 Cancer, Cancer Council Victoria Road; School of Psychology Deakin University), Usha  
51 Menon (Gynaecological Cancer Research Centre, Women's Cancer, Institute for Women's  
52 Health, University College London), Yulan Lin (European Palliative Care Research Centre  
53 (PRC), Department of Oncology, Oslo University Hospital and Institute of Clinical Medicine)  
54  
55  
56  
57  
58  
59  
60

### ICBP Programme Board:

Aileen Keel (Scottish Government, Edinburgh, Scotland); Anna Boltong (Cancer Council Victoria, Carlton, Australia); Anna Gavin (Northern Ireland Cancer Registry, Queens University, Belfast, UK); David Currow (Cancer Institute New South Wales, Sydney, Australia); Gareth Davies (Wales Cancer Network, Cardiff, UK); Gunilla Gunnarsson (Swedish Association of Local Authorities and Regions, Stockholm, Sweden); Heather Bryant (Canadian Partnership Against Cancer, Toronto, Canada); Jane Hanson (Welsh Cancer National Specialist Advisory Group, Cardiff, UK); Kathryn Whitfield (Department of Health, Victoria Australia); Linda Rabeneck (Cancer Care Ontario, Toronto, Canada); Michael A Richards (Care Quality Commission, London, UK); Michael Sherar (Cancer Care Ontario, Toronto, Canada); Nicola Quin (Cancer Council Victoria, Carlton, Australia); Nicole Mittmann (Cancer Care Ontario, Toronto, Canada); Robert Thomas (Department of Health and Human Services, Victoria, Melbourne, Australia); Sara Hiom (Cancer Research UK); Sean Duffy (NHS England, London, UK); Chris Harrison (NHS England, London, UK); Søren Brostrøm (Danish Health and Medicines Authority, Copenhagen, Denmark); Stein Kaasa (University Hospital of Trondheim, Trondheim, Norway).

### ICBP Academic Reference Group

Prof Jan Willem Coebergh, Professor of Cancer Surveillance, Department of Public Health, Erasmus Universiteit Rotterdam, Rotterdam, the Netherlands Jon Emery, Professor of Primary Care Cancer Research, University of Melbourne and Clinical Professor of General Practice, University of Western Australia, Australia Dr Stefan Bergström, Senior consultant oncologist, Department of Oncology, Gävle, Sweden Dr Monique E van Leerdam, Erasmus MC University Medical Centre, the Netherlands Prof Marie-Louise Essink-Bot, Academic Medical Centre, Amsterdam University, the Netherlands Prof Una MacLeod, Senior Lecturer in General Practice and Primary Care, Hull-York Medical School, United Kingdom

### Author's contribution

UM, DW, PV, AZF, HJ planned the study design, data collection, carried out the analyses and wrote the draft manuscript. UM, PV, DW, HJ, AB, AKK, RJB, DHB, JK, VC, ATG, EG, EH, ML, RJW, YL, MM, DT, RDN, VW, IR and SH were responsible for local data collection (alongside the Working Group), management and interpretation, and have participated in writing and have approving the final manuscript version. JB, OB and OTB provided advice on the interpretation of results in their respective jurisdictions and comments or substantial edits on the manuscript, approving the final version.

### Competing Interests

1  
2  
3 None  
4  
5

6 **Data Availability statement**  
7

8 No additional data available  
9

10  
11 **Funding:**  
12

13 This work was supported by: CancerCare Manitoba; Cancer Care Ontario; Canadian  
14 Partnership Against Cancer (CPAC); Cancer Council Victoria; Cancer Research Wales;  
15 Cancer Research UK; Danish Cancer Society; Danish Health and Medicines Authority;  
16 European Palliative Care Research Centre (PRC), Norwegian University of Science and  
17 Technology (NTNU); Northern Ireland Guidelines Audit and Implementation Network (GAIN);  
18 Macmillan Cancer Support; National Cancer Action Team; NHS England; Northern Ireland  
19 Cancer Registry, funded by the Public Health Agency NI; Norwegian Directorate of Health;  
20 Research Centre for Cancer Diagnosis in Primary Care (CaP), Aarhus University, Denmark;  
21 Scottish Government; Swedish Association of Local Authorities and Regions; University  
22 College London and NIHR Biomedical Research Centre at University College London NHS  
23 Foundation Trust; University of Edinburgh; Victorian Department of Health and Human  
24 Services; Welsh Government. The funding bodies had no influence on the design of the study  
25 and collection, analysis, and interpretation of data, in writing the manuscript or whether to  
26 publish the results.  
27  
28  
29  
30  
31  
32  
33  
34

35  
36  
37 **Availability of data and material**  
38

39 The data that support the findings of this study are available from the named authors from  
40 each ICBP jurisdiction, but restrictions apply to the availability of these data and so are not  
41 publicly available. Data are however available from the authors upon reasonable request and  
42 with permission of the ICBP Programme Board. Please contact the ICBP Programme  
43 Management team, based at Cancer Research UK, with any queries ([icbp@caner.org.uk](mailto:icbp@caner.org.uk)).  
44  
45  
46  
47

48 **Ethics approval and consent to participate**  
49

50 For each local data collection, there were specific procedures and approvals which included  
51 anonymised data transfer to University College London and Aarhus University. Approvals  
52 were received from the following institutions: Cancer Council Victoria Human Research Ethics  
53 Committee [HREC 1125]; Health Research Ethics Board, University of Manitoba [HS15227  
54 (H2012:105)]; Research Resource Ethics Committee, CancerCare Manitoba [RRIC#28-2012];  
55 University of Toronto Research Ethics Board [27881]; The Danish Data Protection Agency  
56 [2013-41-2030]; Swedish Ethics Review Board, Uppsala [2013/306]; Norway Regional  
57  
58  
59  
60

1  
2  
3 committees for medical and health research ethics [2013/136/REK nord]; England, Wales and  
4 Scotland, NRES Committee East Midlands – Derby 2, local R&D for each health board  
5 [11/EM/0420]; Northern Ireland ORECNI Ethical approval, local governance for each health  
6 Trust [11/EM/0420].  
7  
8  
9  
10  
11  
12  
13  
14  
15  
16  
17  
18  
19  
20  
21  
22  
23  
24  
25  
26  
27  
28  
29  
30  
31  
32  
33  
34  
35  
36  
37  
38  
39  
40  
41  
42  
43  
44  
45  
46  
47  
48  
49  
50  
51  
52  
53  
54  
55  
56  
57  
58  
59  
60

For peer review only

## References

1. Ferlay J, Steliarova-Foucher E, Lortet-Tieulent J, et al. Cancer incidence and mortality patterns in Europe: Estimates for 40 countries in 2012. *Eur J Cancer* 2013;49(6):1374-403.
2. Allemani C, Weir HK, Carreira H, et al. Global surveillance of cancer survival 1995-2009: analysis of individual data for 25 676 887 patients from 279 population-based registries in 67 countries (CONCORD-2). *Lancet* 2015;385(9972):977-1010.
3. Australian Institute of Health and Welfare 2012. Cancer survival and prevalence in Australia: period estimates from 1982 to 2010. Cancer Series no. 69. Cat. no. CAN 65. Canberra: AIHW <https://www.aihw.gov.au/getmedia/da7bff73-5b78-4cf8-a719-5903a75fcc9a/13953.pdf.aspx?inline=true>
4. Neal RD, Robb  IJ, Lewis M, Williamson I, Hanson J. The complexity and difficulty of diagnosing lung cancer: findings from a national primary-care study in Wales. *Prim Health Care Res Dev* 2015 Sep;16(5):436-49
5. Francisci S, Minicozzi P, Pierannunzio D, et al. Survival patterns in lung and pleural cancer in Europe 1999-2007: Results from the EURO CARE-5 study. *Eur J Cancer* 2015;51(15):2242-53.
6. Coleman MP, Forman D, Bryant H, et al. Cancer survival in Australia, Canada, Denmark, Norway, Sweden, and the UK, 1995-2007 (the International Cancer Benchmarking Partnership): an analysis of population-based cancer registry data. *Lancet* 2011;377(9760):127-38.
7. Olsson JK, Schultz EM, Gould MK. Timeliness of care in patients with lung cancer: a systematic review. *Thorax*. 2009;64(9):749-56
8. Malalasekera A, Nahm, S, Blinman PL, Kao SC, Dhillon H, Vardy J. How long is too long? A Scoping Review of Health System delays in lung cancer. *European Respiratory Reviews*. 2018; 29;27(149)
9. Jacobsen MM, Silverstein SC, Quinn M, Waterston LB, Thomas CA, Benneyan JC, et al. Timeliness of access to lung cancer diagnosis and treatment: A scoping literature review. *Lung Cancer-J Int J Clin Oncol*. 2017;112:156-64.
10. Vinas F, Ben Hassen I, Jabot L, Monnet I, Chouaid C. Delays for diagnosis and treatment of lung cancers: a systematic review. *Clin Respir J*. 2016;10(3):267-

- 1  
2  
3  
4  
5 11. Walter FM, Rubin G, Bankhead C, et al. Symptoms and other factors associated with  
6 time to diagnosis and stage of lung cancer: a prospective cohort study. *Br J Cancer*  
7 2015;112 Suppl 1:S6-13.  
8
- 9  
10 12. Neal RD, Din NU, Hamilton W, et al. Comparison of cancer diagnostic intervals before  
11 and after implementation of NICE guidelines: analysis of data from the UK General  
12 Practice Research Database. *Br J Cancer* 2014;110(3):584-92.  
13
- 14  
15 13. Barrett J, Hamilton W. Pathways to the diagnosis of lung cancer in the UK: a cohort  
16 study. *BMC Fam Pract* 2008;9:31.  
17
- 18  
19 14. Baughan P, O'Neill B, Fletcher E. Auditing the diagnosis of cancer in primary care: the  
20 experience in Scotland. *Br J Cancer* 2009;101 Suppl 2:S87-91.  
21
- 22  
23 15. Guldbrandt LM, Fenger-Gron M, Rasmussen TR, et al. The role of general practice in  
24 routes to diagnosis of lung cancer in Denmark: a population-based study of general  
25 practice involvement, diagnostic activity and diagnostic intervals. *BMC Health Serv Res*  
26 2015;15:21.  
27
- 28  
29 16. Topping ML, Frydenberg M, Hansen RP, et al. Evidence of increasing mortality with  
30 longer diagnostic intervals for five common cancers: a cohort study in primary care. *Eur*  
31 *J Cancer* 2013;49(9):2187-98.  
32
- 33  
34 17. Hansen RP, Vedsted P, Sokolowski I, et al. Time intervals from first symptom to  
35 treatment of cancer: a cohort study of 2,212 newly diagnosed cancer patients. *BMC*  
36 *Health Serv Res* 2011;11:284.  
37
- 38  
39 18. Bjerager M, Palshof T, Dahl R, et al. Delay in diagnosis of lung cancer in general  
40 practice. *Br J Gen Pract* 2006;56(532):863-8.  
41
- 42  
43 19. Rolke HB, Bakke PS, Gallefoss F. Delays in the diagnostic pathways for primary  
44 pulmonary carcinoma in Southern Norway. *Respir Med* 2007;101(6):1251-7.  
45
- 46  
47 20. Largey G, Ristevski E, Chambers H, et al. Lung cancer interval times from point of  
48 referral to the acute health sector to the start of first treatment. *Aust Health Rev* 2016.  
49
- 50  
51 21. Evans SM, Earnest A, Bower W, et al. Timeliness of lung cancer care in Victoria: a  
52 retrospective cohort study. *Med J Aust* 2016;204(2):75 e1-9.  
53
- 54  
55 22. Ellis PM, Vandermeer R. Delays in the diagnosis of lung cancer. *J Thorac Dis*  
56 2011;3(3):183-8.  
57  
58  
59  
60

- 1  
2  
3 23. Lo DS, Zeldin RA, Skrastins R, et al. Time to treat: a system redesign focusing on  
4 decreasing the time from suspicion of lung cancer to diagnosis. *J Thorac Oncol*  
5 2007;2(11):1001-6.  
6  
7
- 8 24. Helsper CW, van Erp NF, Peeters PHM, de Wit NJ. Time to diagnosis and treatment for  
9 cancer patients in the Netherlands: Room for improvement? *European Journal of*  
10 *Cancer* 2017; (87) 113-121  
11  
12
- 13 25. Butler J, Foot C, Bomb M, et al. The International Cancer Benchmarking Partnership:  
14 an international collaboration to inform cancer policy in Australia, Canada, Denmark,  
15 Norway, Sweden and the United Kingdom. *Health Policy* 2013;112(1-2):148-55.  
16  
17
- 18 26. Weller D, Vedsted P, Anandan C, et al. An investigation of routes to cancer diagnosis  
19 in 10 international jurisdictions, as part of the International Cancer Benchmarking  
20 Partnership: survey development and implementation. *BMJ Open* 2016;6(7):e009641.  
21  
22
- 23 27. Weller D, Vedsted P, Rubin G, et al. The Aarhus statement: improving design and  
24 reporting of studies on early cancer diagnosis. *Br J Cancer* 2012;106(7):1262-7.  
25  
26
- 27 28. Jenkinson C, Coulter A, Wright L. Short form 36 (SF36) health survey questionnaire:  
28 normative data for adults of working age. *Bmj*. 1993 May 29;306(6890):1437-40  
29  
30
- 31 29. TNM classification of malignant tumours / edited by L.H. Sobin, M.K. Gospodarowicz,  
32 and Ch. Wittekind. — 7th ed. UICC International Union Against Cancer. ISBN 978-1-  
33 4443-3241-4  
34  
35
- 36 30. Koenker R, Bassett G. Regression quantiles. *Econometrica* 1978; 46:33-50  
37  
38
- 39 31. Machado JAF, Santos Silva JMC. Quantiles for Counts. *J Amer Statistical Assoc* 2005,  
40 100(472): 1226-1237.  
41  
42
- 43 32. Miranda A. QCOUNT: Stata program to fit quantile regression models for count data.  
44 Boston: Boston College Department of Economics; 2006  
45  
46
- 47 33. Lin LI. A concordance correlation coefficient to evaluate reproducibility. *Biometrics*  
48 1989;45(1):255-68.  
49  
50
- 51 34. Walters S, Maringe C, Coleman MP, et al. Lung cancer survival and stage at diagnosis  
52 in Australia, Canada, Denmark, Norway, Sweden and the UK: a population-based  
53 study, 2004-2007. *Thorax* 2013;68(6):551-64.  
54  
55
- 56 35. Nicholson BD, Mant D, Neal RD, et al. International variation in adherence to referral  
57 guidelines for suspected cancer: a secondary analysis of survey data. *Br J Gen Pract*  
58 2016;66(643):e106-13.  
59  
60

- 1  
2  
3 36. Shim J(1), Brindle L, Simon M, George S. A systematic review of symptomatic  
4 diagnosis of lung cancer. *Fam Pract*. 2014 Apr;31(2):137-48  
5  
6  
7 37. Hamilton W, Peters TJ, Round A, et al. What are the clinical features of lung cancer  
8 before the diagnosis is made? A population based case-control study. *Thorax*  
9 2005;60(12):1059-65.  
10  
11  
12 38. Beckett P, Tata LJ, Hubbard RB. Risk factors and survival outcome for non-elective  
13 referral in non-small cell lung cancer patients-analysis based on the National Lung  
14 Cancer Audit. *Lung Cancer* 2014;83(3):396-400.  
15  
16  
17 39. Lim A, Meshher D, Gentry-Maharaj A, et al. Time to diagnosis of Type I or II invasive  
18 epithelial ovarian cancers: a multicentre observational study using patient questionnaire  
19 and primary care records. *BJOG* 2016;123(6):1012-20.  
20  
21  
22  
23 40. Neal RD, Allgar VL, Ali N, et al. Stage, survival and delays in lung, colorectal, prostate  
24 and ovarian cancer: comparison between diagnostic routes. *Br J Gen Pract*  
25 2007;57(536):212-9.  
26  
27  
28 41. Guldbrandt LM, Moller H, Jakobsen E, et al. General practice consultations, diagnostic  
29 investigations, and prescriptions in the year preceding a lung cancer diagnosis. *Cancer*  
30 *Med* 2017;6(1):79-88.  
31  
32  
33 42. Danish National Board of Health. Pakkeforløb for lungekræft [Cancer Patient Pathway  
34 – Lung Cancer], 2016) National Board of Health, Copenhagen. Available at:  
35 [https://www.sst.dk/da/sygdom-og-](https://www.sst.dk/da/sygdom-og-behandling/kraeft/pakkeforloeb/~media/89192ECB2709401CAD8E4BBB0304691E.as)  
36 [behandling/kraeft/pakkeforloeb/~media/89192ECB2709401CAD8E4BBB0304691E.as](https://www.sst.dk/da/sygdom-og-behandling/kraeft/pakkeforloeb/~media/89192ECB2709401CAD8E4BBB0304691E.as)  
37 [hx](https://www.sst.dk/da/sygdom-og-behandling/kraeft/pakkeforloeb/~media/89192ECB2709401CAD8E4BBB0304691E.as) [accessed 25 September 2017]  
38  
39  
40  
41  
42 43. O'Rourke N, Edwards R. Lung cancer treatment waiting times and tumour growth. *Clin*  
43 *Oncol (R Coll Radiol)*. 2000;12(3):141-4.  
44  
45  
46 44. Wang J, Mahasittiwat P, Wong KK, et al. Natural growth and disease progression of  
47 non-small cell lung cancer evaluated with 18F-fluorodeoxyglucose PET/CT. *Lung*  
48 *Cancer* 2012;78(1):51-6.  
49  
50  
51  
52 45. Jensen H, Tørring ML, Vedsted P. Prognostic consequences of implementing cancer  
53 patient pathways in Denmark: a comparative cohort study of symptomatic cancer  
54 patients in primary care. *BMC Cancer* 2017;17:627.  
55  
56  
57  
58 46. Allemani C, Matsuda T, Di Carlo V, et al. Global surveillance of trends in cancer  
59 survival 2000–14 (CONCORD-3): analysis of individual records for 37 513 025 patients  
60

1  
2  
3 diagnosed with one of 18 cancers from 322 population-based registries in 71 countries.  
4 Lancet 2018 Mar 17;391(10125):1023-1075.  
5  
6  
7  
8  
9  
10  
11  
12  
13  
14  
15  
16  
17  
18  
19  
20  
21  
22  
23  
24  
25  
26  
27  
28  
29  
30  
31  
32  
33  
34  
35  
36  
37  
38  
39  
40  
41  
42  
43  
44  
45  
46  
47  
48  
49  
50  
51  
52  
53  
54  
55  
56  
57  
58  
59  
60

For peer review only

1  
2  
3  
4  
5  
6  
7  
8  
9  
10  
11  
12  
13  
14  
15  
16  
17  
18  
19  
20  
21  
22  
23  
24  
25  
26  
27  
28  
29  
30  
31  
32  
33  
34  
35  
36  
37  
38  
39  
40  
41  
42  
43  
44  
45  
46  
47  
48  
49  
50  
51  
52  
53  
54  
55  
56  
57  
58  
59  
60



Time intervals from onset of symptoms to start of treatment based on the Aarhus Statement



Differences in 50th, 75th and 90th centiles of the intervals (days) between Wales as the reference and the other nine jurisdictions. The data are adjusted for differences in age, gender and comorbidity. The bars in black show significant differences in intervals.

420x297mm (300 x 300 DPI)

## Supplementary Web Appendix

### Contents

#### Appendix A. Lung cancer questionnaires

|                                                            |    |
|------------------------------------------------------------|----|
| A1: Patient questionnaire.....                             | 2  |
| A2: Primary care physician (PCP) questionnaire.....        | 16 |
| A3: Cancer treatment specialists (CTS) questionnaire ..... | 24 |

#### Appendix B . Rules for missing, incomplete, multiple response and out of range data.....32

#### Appendix C . Supplementary Tables

|                                                                                                                                                                        |    |
|------------------------------------------------------------------------------------------------------------------------------------------------------------------------|----|
| C1: Classification of lung cancer -specific symptoms reported by patients into cancer specific and non- cancer specific.....                                           | 39 |
| C2: Time intervals (days) depicted as median, 75th and 90th centiles for each of the ten jurisdictions. In Sweden, no data was available on primary care interval..... | 40 |
| C3. Data sources used to define dates and percentage of imputed dates.....                                                                                             | 41 |
| C4: Percentages of negative intervals set to 0, large intervals (>365 days) set to 365 days, and intervals based not on dates.....                                     | 42 |

## Appendix A: Lung cancer questionnaires

### A1: Patient questionnaire



# International Cancer Benchmarking Partnership Module 4

## Patient questionnaire Lung Cancer

Thank you very much for taking the time to fill in this questionnaire – it should take about 20 minutes to complete. We are sending the questionnaire to a large sample of people who we understand have had a diagnosis of lung cancer. If this has been sent to you in error and you do not have cancer, please do not continue and return the documents in the prepaid envelope.

Our aim is to gain a better understanding of the process by which people have their cancer diagnosed. We would also like to find out more about the symptoms they experience (if any), and the pathway they follow from start of symptoms to treatment of their cancer. This will help in identifying ways in which cancers can be diagnosed quickly and effectively. Thank you once again for your time.

**This information is confidential and will not be passed to anyone involved in your treatment.**

Name:

---

Date of Birth:

---

Address:

---

---

---

Copyright property of the International Benchmarking Partnership (ICBP) and Module 4 collaborators. Usage must be authorised



## Consent form

---

Please read the consent form and sign your name and date **BELOW**.

If you require any clarification, please do not hesitate to ring the study team members. Their contact details are found on the information sheet.

Please be reassured that your responses are completely confidential and will not be passed to anyone involved in your treatment. For the purposes of the study it is important that you agree to consent to all the statements listed below.

- I confirm that I have read the attached information sheet and I understand why the research is being done.
- I am willing for the team to request information from my GP and hospital doctors which is relevant to the audit as described in the information sheet.
- I give permission for my details (name, address) to be given to the cancer registry (NHS Information Centre for Health and Social Care) for follow up.
- I agree for the information I have provided and any other relevant information from my medical records to be stored as described in the information sheet under the custodianship of University College London.
- I consent to sharing of coded data which contains no personal identifiers between researchers, some of whom are located outside the European Union.
- I consent for use of my data if I become mentally incapacitated during the course of the project.

**I agree to all the statements listed and consent to participate in the study.**

Name (Please print)

---

Signature:

---

Date:

---

If we have any questions, may we phone you for clarification?

(Please tick)

Yes  No

If **Yes**, please provide your telephone number:

---

Copyright property of the International Benchmarking Partnership (ICBP) and Module 4 collaborators. Usage must be authorised



1  
2  
3  
4  
5  
6  
7 **1. Please can you confirm the details of your GP/GP practice (name, practice**  
8 **address – as best as you can remember): We appreciate that you may have**  
9 **more than one GP involved in your care – in which case, we are interested**  
10 **in the GP you would say provides the majority of your care, particularly**  
11 **relating to the cancer you’ve had diagnosed.**  
12  
13

14 Name of doctor

15 \_\_\_\_\_  
16  
17 Name of practice

18 \_\_\_\_\_  
19  
20 Address

21 \_\_\_\_\_  
22  
23  
24  
25  
26  
27  
28 Postcode

29 \_\_\_\_\_  
30  
31 Town

Sample

32  
33  
34  
35  
36  
37  
38  
39  
40  
41  
42  
43  
44  
45  
46  
47  
48  
49  
50  
51  
52  
53  
54 Copyright property of the International Benchmarking Partnership (ICBP)  
55 and Module 4 collaborators. Usage must be authorised  
56  
57  
58  
59  
60



2. Which of the following **best describes** the events which led to your diagnosis of cancer? (please tick only **ONE** answer)



|                                                                                                               |                                     |
|---------------------------------------------------------------------------------------------------------------|-------------------------------------|
| I had symptoms/I noticed a bodily change and went to see a doctor (e.g. GP)                                   | <input checked="" type="checkbox"/> |
| I had symptoms/I noticed a bodily change and went/was taken to Accident and Emergency (A&E)                   | <input type="checkbox"/>            |
| I had seen a doctor/GP with symptoms, but went/was taken to Accident and Emergency (A&E) when things worsened | <input type="checkbox"/>            |
| I was being investigated by my doctor(s) for another problem during which time the cancer was discovered      | <input type="checkbox"/>            |
| Other (please describe):<br><br><h1>Sample</h1>                                                               | <input type="checkbox"/>            |

Copyright property of the International Benchmarking Partnership (ICBP) and Module 4 collaborators. Usage must be authorised



3. The following health concerns or symptoms are commonly experienced with lung cancer.

|                                |
|--------------------------------|
| Cough                          |
| Breathlessness                 |
| Being short of breath          |
| Chest pain / Pain on breathing |
| Coughing up blood              |
| Bloody sputum/blood in spit    |
| Unexplained weight loss        |
| Loss of appetite               |
| Fatigue                        |

Please write down **ALL** health concern(s) or symptom(s) you may have had before contacting a doctor or taking part in screening. It does not matter if they are not included in the list above:

|                                                                       |
|-----------------------------------------------------------------------|
| Please write your health concern(s) or symptom(s) in the boxes below: |
| 1)                                                                    |
| 2)                                                                    |
| 3)                                                                    |
| 4)                                                                    |
| 5)                                                                    |
| 6)                                                                    |



|                                                                              |                                     |
|------------------------------------------------------------------------------|-------------------------------------|
| This is not applicable to me (e.g. I did not have any symptoms), please tick | <input checked="" type="checkbox"/> |
|------------------------------------------------------------------------------|-------------------------------------|

Copyright property of the International Benchmarking Partnership (ICBP) and Module 4 collaborators. Usage must be authorised



- 1  
2  
3  
4  
5  
6  
7 **4. Please write down your best estimate of the date you noticed the first of**  
8 **these health concern(s) or symptom(s).** If you cannot remember the exact date,  
9 you can fill in the month and the year.

10  
11 Day (optional), month, year

|   |   |   |   |   |   |   |   |
|---|---|---|---|---|---|---|---|
| D | D | M | M | Y | Y | Y | Y |
|---|---|---|---|---|---|---|---|



12  
13  
14  
15  
16 This is not applicable to me (e.g. I had no symptoms), please tick

- 17  
18  
19  
20 **5. Approximately how long did you have health concern(s) or symptom(s)**  
21 **before contacting a doctor? (Please think of the first visit to the doctor, not**  
22 **re-visits after that).** Please tick only **ONE** answer.



|                     |  |
|---------------------|--|
| Less than 1 week    |  |
| 1-2 weeks           |  |
| 3-4 weeks           |  |
| 5-7 weeks           |  |
| 2-5 months          |  |
| 6-12 months         |  |
| More than 12 months |  |



23  
24  
25  
26  
27  
28  
29  
30  
31  
32  
33  
34  
35  
36  
37  
38  
39  
40 This is not applicable to me (e.g. I had no symptoms), please tick

41  
42  
43  
44  
45  
46  
47  
48  
49  
50  
51  
52  
53  
54 Copyright property of the International Benchmarking Partnership (ICBP)  
55 and Module 4 collaborators. Usage must be authorised



1  
2  
3  
4  
5  
6  
7 **6a. Once you contacted a practice about your health concern(s) or symptom(s),**  
8 **how long did it take to get an appointment with a doctor? (Please think of**  
9 **the first visit to the doctor, to discuss your health concern(s) or symptom(s)).**  
10 Please tick only **ONE** answer. ✓

|                                                                                         |                          |
|-----------------------------------------------------------------------------------------|--------------------------|
| Same day/next day                                                                       | <input type="checkbox"/> |
| Within 1 week                                                                           | <input type="checkbox"/> |
| 1-2 weeks                                                                               | <input type="checkbox"/> |
| 3-4 weeks                                                                               | <input type="checkbox"/> |
| Longer                                                                                  | <input type="checkbox"/> |
| If there was no waiting time<br>(e.g. you went/were taken to A&E), please tick this box | <input type="checkbox"/> |
| This is not applicable to me (e.g. I had no symptoms), please tick                      | <input type="checkbox"/> |

22  
23  
24  
25  
26  
27  
28  
29  
30 **6b. What was the date you first saw your doctor about your health concern(s)**  
31 **or symptom(s)?** If you cannot remember the exact date, you can fill in the month  
32 and the year.

33  
34 Day (optional), month, year

|                                                                    |   |   |   |   |   |   |   |                          |
|--------------------------------------------------------------------|---|---|---|---|---|---|---|--------------------------|
| D                                                                  | D | M | M | Y | Y | Y | Y | <input type="checkbox"/> |
| This is not applicable to me (e.g. I had no symptoms), please tick |   |   |   |   |   |   |   | <input type="checkbox"/> |

35  
36  
37  
38  
39  
40  
41  
42  
43  
44  
45  
46  
47  
48  
49  
50  
51  
52  
53  
54 Copyright property of the International Benchmarking Partnership (ICBP)  
55 and Module 4 collaborators. Usage must be authorised  
56  
57  
58  
59  
60



7. How many times did you visit the following for the investigation of your symptoms before your cancer was diagnosed?

|                                             | Please write down the number of visits |
|---------------------------------------------|----------------------------------------|
| GP                                          |                                        |
| Hospital                                    |                                        |
| Consultant/specialist outside of a hospital |                                        |



|                                                                    |                          |
|--------------------------------------------------------------------|--------------------------|
| This is not applicable to me (e.g. I had no symptoms), please tick | <input type="checkbox"/> |
|--------------------------------------------------------------------|--------------------------|

8a. After your doctor referred you to a specialist, how long did it take you to get an appointment? Please tick only **ONE** answer.

|                     |                          |
|---------------------|--------------------------|
| Less than 1 week    | <input type="checkbox"/> |
| 1-2 weeks           | <input type="checkbox"/> |
| 3-4 weeks           | <input type="checkbox"/> |
| 5-7 weeks           | <input type="checkbox"/> |
| 2-5 months          | <input type="checkbox"/> |
| 6-12 months         | <input type="checkbox"/> |
| More than 12 months | <input type="checkbox"/> |



|                                                                             |                          |
|-----------------------------------------------------------------------------|--------------------------|
| This is not applicable to me (e.g. my doctor did not refer me), please tick | <input type="checkbox"/> |
|-----------------------------------------------------------------------------|--------------------------|



Copyright property of the International Benchmarking Partnership (ICBP) and Module 4 collaborators. Usage must be authorised



**8b. What was the date of your first appointment with a doctor, involved in investigating and/or treating your cancer, to whom you were referred?**

If you cannot remember the exact date, you can fill in the month and the year.

Day (optional), month, year

|   |   |   |   |   |   |   |   |
|---|---|---|---|---|---|---|---|
| D | D | M | M | Y | Y | Y | Y |
|---|---|---|---|---|---|---|---|



|                                                                             |                          |
|-----------------------------------------------------------------------------|--------------------------|
| This is not applicable to me (e.g. my doctor did not refer me), please tick | <input type="checkbox"/> |
|-----------------------------------------------------------------------------|--------------------------|

**9. What was the date you were told you had cancer?** If you cannot remember the exact date, you can fill in the month and the year.

Day (optional), month, year

|   |   |   |   |   |   |   |   |
|---|---|---|---|---|---|---|---|
| D | D | M | M | Y | Y | Y | Y |
|---|---|---|---|---|---|---|---|

Sample

Copyright property of the International Benchmarking Partnership (ICBP) and Module 4 collaborators. Usage must be authorised



**10. Have you had any of the following treatments for your cancer yet? If so, please can you estimate the date this treatment started?** Please tick **ALL** that apply. If you cannot remember the exact date, you can fill in the month and the year.

|    | Type of treatment         |                                                             | Date of treatment<br>(give first date if you had more than one)                                                                                                                                 |   |   |   |   |   |   |   |   |
|----|---------------------------|-------------------------------------------------------------|-------------------------------------------------------------------------------------------------------------------------------------------------------------------------------------------------|---|---|---|---|---|---|---|---|
| a. | Surgery                   | <input type="checkbox"/> Yes<br><input type="checkbox"/> No | Day (optional), month, year<br><table border="1" style="width: 100%; text-align: center;"> <tr> <td>D</td><td>D</td><td>M</td><td>M</td><td>Y</td><td>Y</td><td>Y</td><td>Y</td> </tr> </table> | D | D | M | M | Y | Y | Y | Y |
| D  | D                         | M                                                           | M                                                                                                                                                                                               | Y | Y | Y | Y |   |   |   |   |
| b. | Chemotherapy              | <input type="checkbox"/> Yes<br><input type="checkbox"/> No | Day (optional), month, year<br><table border="1" style="width: 100%; text-align: center;"> <tr> <td>D</td><td>D</td><td>M</td><td>M</td><td>Y</td><td>Y</td><td>Y</td><td>Y</td> </tr> </table> | D | D | M | M | Y | Y | Y | Y |
| D  | D                         | M                                                           | M                                                                                                                                                                                               | Y | Y | Y | Y |   |   |   |   |
| c. | Radiotherapy              | <input type="checkbox"/> Yes<br><input type="checkbox"/> No | Day (optional), month, year<br><table border="1" style="width: 100%; text-align: center;"> <tr> <td>D</td><td>D</td><td>M</td><td>M</td><td>Y</td><td>Y</td><td>Y</td><td>Y</td> </tr> </table> | D | D | M | M | Y | Y | Y | Y |
| D  | D                         | M                                                           | M                                                                                                                                                                                               | Y | Y | Y | Y |   |   |   |   |
| d. | Other<br>Please specify:  | <input type="checkbox"/> Yes<br><input type="checkbox"/> No | Day (optional), month, year<br><table border="1" style="width: 100%; text-align: center;"> <tr> <td>D</td><td>D</td><td>M</td><td>M</td><td>Y</td><td>Y</td><td>Y</td><td>Y</td> </tr> </table> | D | D | M | M | Y | Y | Y | Y |
| D  | D                         | M                                                           | M                                                                                                                                                                                               | Y | Y | Y | Y |   |   |   |   |
| e. | Treatment not started yet | <input type="checkbox"/> Yes                                |                                                                                                                                                                                                 |   |   |   |   |   |   |   |   |

Copyright property of the International Benchmarking Partnership (ICBP) and Module 4 collaborators. Usage must be authorised



**11. Who is the consultant doctor who has taken responsibility for diagnosing and or/treating your cancer?**

|                      |
|----------------------|
| Name of consultant:  |
| Hospital name:       |
| Hospital department: |

**Please can you answer some more general questions about your health?**

It will help us in interpreting your responses to this questionnaire to know about your general health and other health problems you may have had in the past.

**12. Looking back to the 2 years before you were diagnosed with cancer, would you say your general health was** (Please tick only **ONE** answer.):



|           |  |
|-----------|--|
| Very good |  |
| Good      |  |
| Fair      |  |
| Poor      |  |
| Very poor |  |

**13. Have you been treated before for any of the conditions below?**

Please tick 'yes' or 'no' for each condition:

|                                      |                                                          |
|--------------------------------------|----------------------------------------------------------|
| Heart disease                        | <input type="checkbox"/> Yes <input type="checkbox"/> No |
| Stroke                               | <input type="checkbox"/> Yes <input type="checkbox"/> No |
| Lung disease (excluding lung cancer) | <input type="checkbox"/> Yes <input type="checkbox"/> No |
| Diabetes                             | <input type="checkbox"/> Yes <input type="checkbox"/> No |

Copyright property of the International Benchmarking Partnership (ICBP) and Module 4 collaborators. Usage must be authorised



1  
2  
3  
4  
5  
6  
7 **Finally, a little more information about you.** The information you provide below  
8 will help us to analyse the results of the survey in more detail.  
9

10  
11 **14. Which of these best describes your ethnic group? (please tick one box, as**  
12 **appropriate).** If you are descended from more than one ethnic or racial group,  
13 please tick the group you consider you belong to, or tick 'any other ethnic group'.  
14

15 ✓ ✓ ✓ ✓

|                                         |                          |         |                          |                      |                          |                    |                          |
|-----------------------------------------|--------------------------|---------|--------------------------|----------------------|--------------------------|--------------------|--------------------------|
| White                                   | <input type="checkbox"/> | Chinese | <input type="checkbox"/> | Black -<br>Caribbean | <input type="checkbox"/> | Black -<br>African | <input type="checkbox"/> |
| Black - other                           | <input type="checkbox"/> | Indian  | <input type="checkbox"/> | Pakistani            | <input type="checkbox"/> | Bangladeshi        | <input type="checkbox"/> |
| Any other ethnic group, please specify: |                          |         |                          |                      |                          |                    | <input type="checkbox"/> |

16  
17  
18  
19  
20  
21  
22  
23  
24  
25  
26  
27  
28 **15. What is the main language spoken in your home? Please tick** ✓  
29

|                        |                          |
|------------------------|--------------------------|
| English                | <input type="checkbox"/> |
| Other, please specify: | <input type="checkbox"/> |

30  
31  
32  
33  
34  
35  
36 **16. What is the highest level of education you have achieved?** ✓  
37

38 Please tick only **ONE** answer.

|                                                      |                          |
|------------------------------------------------------|--------------------------|
| Finished school at or before the age of fifteen      | <input type="checkbox"/> |
| Completed GCSEs, O-levels or equivalent              | <input type="checkbox"/> |
| Completed A Levels or equivalent                     | <input type="checkbox"/> |
| Completed further education but not a degree         | <input type="checkbox"/> |
| Completed a Bachelor's degree / Masters degree / PhD | <input type="checkbox"/> |
| Other, please specify:                               | <input type="checkbox"/> |

39  
40  
41  
42  
43  
44  
45  
46  
47  
48  
49  
50  
51  
52  
53  
54 Copyright property of the International Benchmarking Partnership (ICBP)  
55 and Module 4 collaborators. Usage must be authorised  
56  
57  
58  
59  
60



1  
2  
3  
4  
5  
6  
7 **17. Have you ever smoked cigarettes, including hand-rolled ones,**  
8 **pipes or cigars?**

9  
10  Yes  No

11  
12  
13 **18. Are you a current smoker, smoking either cigarettes,**  
14 **including hand-rolled ones, pipes or cigars?**

15  
16  Yes  No

17  
18  
19  
20 **19. If you are a current smoker or have smoked in the past, how many**  
21 **cigarettes, including hand-rolled ones, pipes or cigars on average do you**  
22 **smoke/have you smoked per day?**

23  
24  
25 Number per day:

26  
27  
28  
29  
30  
31  
32  
33  
34  
35  
36  
37  
38  
39  
40  
41  
42  
43  
44  
45  
46  
47  
48  
49  
50  
51  
52  
53  
54  
55  
56  
57  
58  
59  
60

Sample

Copyright property of the International Benchmarking Partnership (ICBP)  
and Module 4 collaborators. Usage must be authorised



**20. Further comments**

**Please add anything else that you would like to tell us about your cancer diagnosis or treatment.**

Sample

**Thank you very much for taking the time to complete this questionnaire.**

Copyright property of the International Benchmarking Partnership (ICBP) and Module 4 collaborators. Usage must be authorised

## A2: Primary care physician (PCP) questionnaire



## International Cancer Benchmarking Partnership Module 4

### Primary Care Audit Lung Cancer

Thank you very much for agreeing to fill in this questionnaire. As part of an international study examining differences in cancer survival, we are sending the questionnaire to health care providers of a sample of consented patients with cancer.

Our aim is to gain a better understanding of the process by which people have their cancer diagnosed – the symptoms they experience, and the pathway they follow from onset of symptoms to treatment of their cancer. This will help in identifying ways in which cancers can be diagnosed and treated quickly and effectively. Thank you once again for your time.

**Please can you refer to your patient's notes in completing the questionnaire as this will help in obtaining accurate data on time points.**

.....  
If you would prefer to return this questionnaire without the patient details, please tear off along the dotted line

ID-number: Jurisdiction-ID + Patient-ID:  
\_\_\_\_\_

Copyright property of the International Benchmarking Partnership (ICBP) and Module 4 collaborators. Usage must be authorised

1  
2  
3  
4  
5  
6  
7  
8  
9  
10  
11  
12  
13  
14  
15  
16  
17  
18  
19  
20  
21  
22  
23  
24  
25  
26  
27  
28  
29  
30  
31  
32  
33  
34  
35  
36  
37  
38  
39  
40  
41  
42  
43  
44  
45  
46  
47  
48  
49  
50  
51  
52  
53  
54  
55  
56  
57  
58  
59  
60



# Sample

.....  
**Patient information**

ID-number: Jurisdiction-ID + Patient-ID:

Full name:

Address:

Postcode:

Date of birth:

|   |   |   |   |   |   |   |   |
|---|---|---|---|---|---|---|---|
| D | D | M | M | Y | Y | Y | Y |
|---|---|---|---|---|---|---|---|

Copyright property of the International Benchmarking Partnership (ICBP) and Module 4 collaborators. Usage must be authorised



**1. Duration of symptoms**

Please estimate how long your patient had symptom(s), attributable to lung cancer, before attending your practice (or other health service).

We appreciate that identifying a 'date of first symptom' is not always straightforward – particularly when there are multiple and/or chronic symptoms. Nevertheless, we hope you can provide a 'best estimate'.



| Estimate of symptom duration<br>(please tick <b>one</b> ): |  | What were the symptoms?<br>Please describe: |
|------------------------------------------------------------|--|---------------------------------------------|
| Less than 1 week                                           |  |                                             |
| 1 to 4 weeks                                               |  |                                             |
| 5 to 7 weeks                                               |  |                                             |
| 2-5 months                                                 |  |                                             |
| 6-12 months                                                |  |                                             |
| More than 12 months                                        |  |                                             |
| Not possible to estimate                                   |  |                                             |
| No symptoms<br>(e.g. screen detected cancers)              |  |                                             |

Copyright property of the International Benchmarking Partnership (ICBP) and Module 4 collaborators. Usage must be authorised



## 2. Pathway of presentation

### 2.1 Through what route did the patient first present? Please tick **ONE**:

✓

|                                                                                                                                            |   |                                                                                                                                                                                                                                                                                                                            |
|--------------------------------------------------------------------------------------------------------------------------------------------|---|----------------------------------------------------------------------------------------------------------------------------------------------------------------------------------------------------------------------------------------------------------------------------------------------------------------------------|
| Your patient first presented to primary care (either in-hours or out-of-hours)                                                             | ✓ | Please can you provide your best approximation of the date of this <b>primary care</b> visit<br><div style="border: 1px solid black; padding: 2px; display: flex; justify-content: space-around;"> <span>D</span><span>D</span><span>M</span><span>M</span><span>Y</span><span>Y</span><span>Y</span><span>Y</span> </div> |
| Your patient presented straight to A&E (with or without your involvement)                                                                  |   |                                                                                                                                                                                                                                                                                                                            |
| Your patient first presented to primary care, but then at a later date presented to A&E as an emergency (with or without your involvement) |   | Please can you provide your best approximation of the date of this <b>primary care</b> visit<br><div style="border: 1px solid black; padding: 2px; display: flex; justify-content: space-around;"> <span>D</span><span>D</span><span>M</span><span>M</span><span>Y</span><span>Y</span><span>Y</span><span>Y</span> </div> |
| Other – please describe:                                                                                                                   |   |                                                                                                                                                                                                                                                                                                                            |

Copyright property of the International Benchmarking Partnership (ICBP) and Module 4 collaborators. Usage must be authorised



**3. Date you ordered any tests/investigations in response to symptom(s).**

We are interested in any kind of tests/investigations (e.g. imaging etc) that you may have ordered. Please only consider the tests/investigations that you ordered yourself. Please tick **all** that apply and put in the date that the test/investigation was ordered:



|                         |  |                 |
|-------------------------|--|-----------------|
| Chest x-ray             |  | D D M M Y Y Y Y |
| MRI scan                |  | D D M M Y Y Y Y |
| CT scan                 |  | D D M M Y Y Y Y |
| PET scan                |  | D D M M Y Y Y Y |
| Sputum test             |  | D D M M Y Y Y Y |
| Lung biopsy             |  | D D M M Y Y Y Y |
| Bronchoscopy            |  | D D M M Y Y Y Y |
| Other (please specify): |  | D D M M Y Y Y Y |

**4. Date of referral to specialist medical services**

At what date did you **first** refer the patient to hospital or another specialist transferring the responsibility for on-going investigation/treatment to other medical services?

|   |   |   |   |   |   |   |   |
|---|---|---|---|---|---|---|---|
| D | D | M | M | Y | Y | Y | Y |
|---|---|---|---|---|---|---|---|

Copyright property of the International Benchmarking Partnership (ICBP) and Module 4 collaborators. Usage must be authorised



## 5. Nature of this referral

### 5.1 Do you know the date that the patient was seen for this referral?

Yes, please provide the date: 

|   |   |   |   |   |   |   |   |
|---|---|---|---|---|---|---|---|
| D | D | M | M | Y | Y | Y | Y |
|---|---|---|---|---|---|---|---|

No

### 5.2 If you did make a referral to specialist services, which of the following best describes the nature/characteristics of this referral? Please tick **one**.

|                                                                                                                              |                                     |
|------------------------------------------------------------------------------------------------------------------------------|-------------------------------------|
| Emergency admission: a referral to A&E (or equivalent) for immediate admission                                               | <input checked="" type="checkbox"/> |
| An urgent referral for assessment of cancer symptoms/signs/test results (Note this will be within 2 weeks for England/Wales) | <input type="checkbox"/>            |
| A less urgent referral in which cancer is raised as a possibility (Note this will be greater than 2 weeks for England/Wales) | <input type="checkbox"/>            |
| A more general referral for investigation and assessment without cancer mentioned                                            | <input type="checkbox"/>            |
| No referral was made                                                                                                         | <input type="checkbox"/>            |
| Other – please describe                                                                                                      | <input type="checkbox"/>            |

### 5.3 Would you say this patient's diagnostic pathway was conducted predominantly in the public or private system? Please tick **one**.

|                           |                                     |
|---------------------------|-------------------------------------|
| Public healthcare system  | <input checked="" type="checkbox"/> |
| Private healthcare system | <input type="checkbox"/>            |

Copyright property of the International Benchmarking Partnership (ICBP) and Module 4 collaborators. Usage must be authorised



6. Date of lung cancer diagnosis

This can be decided in different ways. Please tick **all** that apply.  
Please provide whichever of the following dates you have to hand:



|                                                                                  |                                     |                                                                                                                         |   |   |   |   |   |   |   |   |
|----------------------------------------------------------------------------------|-------------------------------------|-------------------------------------------------------------------------------------------------------------------------|---|---|---|---|---|---|---|---|
| Date of histological confirmation [ideal]                                        | <input checked="" type="checkbox"/> | <table border="1"> <tr> <td>D</td><td>D</td><td>M</td><td>M</td><td>Y</td><td>Y</td><td>Y</td><td>Y</td> </tr> </table> | D | D | M | M | Y | Y | Y | Y |
| D                                                                                | D                                   | M                                                                                                                       | M | Y | Y | Y | Y |   |   |   |
| Date results of investigation (histological or other) confirming cancer received | <input type="checkbox"/>            | <table border="1"> <tr> <td>D</td><td>D</td><td>M</td><td>M</td><td>Y</td><td>Y</td><td>Y</td><td>Y</td> </tr> </table> | D | D | M | M | Y | Y | Y | Y |
| D                                                                                | D                                   | M                                                                                                                       | M | Y | Y | Y | Y |   |   |   |
| Date patient was told                                                            | <input type="checkbox"/>            | <table border="1"> <tr> <td>D</td><td>D</td><td>M</td><td>M</td><td>Y</td><td>Y</td><td>Y</td><td>Y</td> </tr> </table> | D | D | M | M | Y | Y | Y | Y |
| D                                                                                | D                                   | M                                                                                                                       | M | Y | Y | Y | Y |   |   |   |
| Date biopsy undertaken                                                           | <input type="checkbox"/>            | <table border="1"> <tr> <td>D</td><td>D</td><td>M</td><td>M</td><td>Y</td><td>Y</td><td>Y</td><td>Y</td> </tr> </table> | D | D | M | M | Y | Y | Y | Y |
| D                                                                                | D                                   | M                                                                                                                       | M | Y | Y | Y | Y |   |   |   |
| Date patient was first admitted to hospital because of the malignancy            | <input type="checkbox"/>            | <table border="1"> <tr> <td>D</td><td>D</td><td>M</td><td>M</td><td>Y</td><td>Y</td><td>Y</td><td>Y</td> </tr> </table> | D | D | M | M | Y | Y | Y | Y |
| D                                                                                | D                                   | M                                                                                                                       | M | Y | Y | Y | Y |   |   |   |
| Other (please specify)                                                           | <input type="checkbox"/>            | <table border="1"> <tr> <td>D</td><td>D</td><td>M</td><td>M</td><td>Y</td><td>Y</td><td>Y</td><td>Y</td> </tr> </table> | D | D | M | M | Y | Y | Y | Y |
| D                                                                                | D                                   | M                                                                                                                       | M | Y | Y | Y | Y |   |   |   |

Copyright property of the International Benchmarking Partnership (ICBP) and Module 4 collaborators. Usage must be authorised



## 7. Additional information

Finally, we are interested to know what other conditions your patient has, and the severity/impact of these conditions

Have you and/or any of your partners treated this patient (or has the patient been to hospital) for any of the following conditions? Please tick **all** that apply:

|                                   |                                                          |
|-----------------------------------|----------------------------------------------------------|
| Cardiovascular disease            | <input type="checkbox"/> Yes <input type="checkbox"/> No |
| Stroke                            | <input type="checkbox"/> Yes <input type="checkbox"/> No |
| Lung disease (except lung cancer) | <input type="checkbox"/> Yes <input type="checkbox"/> No |
| Diabetes                          | <input type="checkbox"/> Yes <input type="checkbox"/> No |

Are there any other comments you would like to make about this patient?

Sample

Name (and title):

---

Signature:

---

Date:

---

**Thank you very much for taking the time to complete this questionnaire.**

Copyright property of the International Benchmarking Partnership (ICBP) and Module 4 collaborators. Usage must be authorised

1  
2  
3 A3: Cancer treatment specialists (CTS) questionnaire  
4  
5



10  
11  
12  
13  
14  
15 **International Cancer Benchmarking**  
16 **Partnership Module 4**  
17  
18

19  
20  
21  
22  
23  
24 **Specialist Care Audit**  
**Lung Cancer**

25 Thank you very much for agreeing to fill in this questionnaire – it should take about 10  
26 minutes to complete. As part of an international study examining differences in cancer survival,  
27 we are sending the questionnaire to health care providers of a sample of patients with cancer.  
28

29  
30 Our aim is to gain a better understanding of the process by which people have their cancer  
31 diagnosed – the symptoms they experience, and the pathway they follow from onset of  
32 symptoms to treatment of their cancer. We hope you can help us with information on this  
33 patient's cancer journey **once they were referred to specialist cancer services**. This will help  
34 in identifying ways in which cancers can be diagnosed and treated quickly and effectively.  
35  
36

37 **Thank you once again for your time**

38  
39 **Please can you refer to your patient's notes in completing the questionnaire,**  
40 **as this will help in obtaining accurate data on time points.**  
41

42 .....  
43  
44 If you would prefer to return this questionnaire without the patient details,  
45 please tear off along the dotted line.  
46  
47

48  
49 Your patient

50 \_\_\_\_\_  
51 is participating in the study.  
52  
53  
54  
55  
56  
57

58 Copyright property of the International Benchmarking Partnership (ICBP)  
59 and Module 4 collaborators. Usage must be authorised  
60

1  
2  
3  
4  
5  
6  
7  
8  
9  
10  
11  
12  
13  
14  
15  
16  
17  
18  
19  
20  
21  
22  
23  
24  
25  
26  
27  
28  
29  
30  
31  
32  
33  
34  
35  
36  
37  
38  
39  
40  
41  
42  
43  
44  
45  
46  
47  
48  
49  
50  
51  
52  
53  
54  
55  
56  
57  
58  
59  
60



# Sample

.....  
**Patient information**

ID-number: Jurisdiction-ID + Patient-ID:

Full name:

Address:

Postcode:

Date of birth:

|   |   |   |   |   |   |   |   |
|---|---|---|---|---|---|---|---|
| D | D | M | M | Y | Y | Y | Y |
|---|---|---|---|---|---|---|---|

Copyright property of the International Benchmarking Partnership (ICBP) and Module 4 collaborators. Usage must be authorised



**1. Date patient first attended hospital/specialist services related to their cancer diagnosis.** We appreciate this date can at times be difficult to identify, particularly when there have been multiple visits in the lead up to a definitive diagnosis. Put another way, it's the date that the hospital/specialist service **assumed responsibility for on-going investigation/treatment** for your patient.

Day (optional), month, year

|   |   |   |   |   |   |   |   |
|---|---|---|---|---|---|---|---|
| D | D | M | M | Y | Y | Y | Y |
|---|---|---|---|---|---|---|---|

**2. How was the patient referred to the hospital/specialist services related to their cancer diagnosis?** Please tick.

Was it through a:

|                                        |                                     |                                  |                                     |
|----------------------------------------|-------------------------------------|----------------------------------|-------------------------------------|
| GP referral                            | <input checked="" type="checkbox"/> | Referral from respiratory clinic | <input checked="" type="checkbox"/> |
| Medical specialist/Consultant referral | <input type="checkbox"/>            | Other referral – please specify: | <input type="checkbox"/>            |

**3. Where did this first contact/appointment happen?** Please tick.

Which of the following best describes where this first contact/appointment took place?

|                                        |                                     |                                                                 |                                     |
|----------------------------------------|-------------------------------------|-----------------------------------------------------------------|-------------------------------------|
| Emergency department ('A&E')           | <input checked="" type="checkbox"/> | Medical outpatient department, please specify which department  | <input checked="" type="checkbox"/> |
| Oncology general outpatient department | <input type="checkbox"/>            | Surgical outpatient department, please specify which department | <input type="checkbox"/>            |
| Other – please specify:                |                                     |                                                                 | <input type="checkbox"/>            |

Copyright property of the International Benchmarking Partnership (ICBP) and Module 4 collaborators. Usage must be authorised



#### 4. Date of diagnosis

This can be decided in different ways.

Please tick and complete as many of the following dates as possible.

|                                                                       |  |                                                                                                                                                                                                        |
|-----------------------------------------------------------------------|--|--------------------------------------------------------------------------------------------------------------------------------------------------------------------------------------------------------|
| Date of histological confirmation (ideal)                             |  | Day (optional), month, year<br><input type="text"/> <input type="text"/> |
| Date results of investigation confirming cancer received              |  | Day (optional), month, year<br><input type="text"/> <input type="text"/> |
| Date patient was told                                                 |  | Day (optional), month, year<br><input type="text"/> <input type="text"/> |
| Date of biopsy                                                        |  | Day (optional), month, year<br><input type="text"/> <input type="text"/> |
| Date patient was first admitted to hospital because of the malignancy |  | Day (optional), month, year<br><input type="text"/> <input type="text"/> |
| Date of MDT confirmation of diagnosis                                 |  | Day (optional), month, year<br><input type="text"/> <input type="text"/> |
| Other (please specify):                                               |  | Day (optional), month, year<br><input type="text"/> <input type="text"/> |

Copyright property of the International Benchmarking Partnership (ICBP) and Module 4 collaborators. Usage must be authorised



**5. Date treatment for the cancer commenced**

Based on your records, when would you say that any treatment specifically targeting the patient’s cancer started?

Day (optional), month, year

|   |   |   |   |   |   |   |   |
|---|---|---|---|---|---|---|---|
| D | D | M | M | Y | Y | Y | Y |
|---|---|---|---|---|---|---|---|

**6. Additional information**

Please can you provide any further information on the patient’s cancer:

| TNM, please tick as appropriate: |  |
|----------------------------------|--|
| 0                                |  |
| I                                |  |
| IIA                              |  |
| IIB                              |  |
| IIC                              |  |
| IIIA                             |  |
| IIIB                             |  |
| IIIC                             |  |
| IV                               |  |
| Not able to stage                |  |

Sample

Copyright property of the International Benchmarking Partnership (ICBP) and Module 4 collaborators. Usage must be authorised

1  
2  
3  
4  
5  
6  
7  
8  
9  
10  
11  
12  
13  
14  
15  
16  
17  
18  
19  
20  
21  
22  
23  
24  
25  
26  
27  
28  
29  
30  
31  
32  
33  
34  
35  
36  
37  
38  
39  
40  
41  
42  
43  
44  
45  
46  
47  
48  
49  
50  
51  
52  
53  
54  
55  
56  
57  
58  
59  
60



**6.1 Histological subtype:**



|                         |  |
|-------------------------|--|
| Squamous cell carcinoma |  |
| Adenocarcinoma          |  |
| Large cell carcinoma    |  |
| Non-small carcinoma     |  |
| Small cell carcinoma    |  |
| Carcinoid               |  |
| Unclassified            |  |
| Other (please specify): |  |

Sample

Copyright property of the International Benchmarking Partnership (ICBP) and Module 4 collaborators. Usage must be authorised

1  
2  
3  
4  
5  
6  
7  
8  
9  
10  
11  
12  
13  
14  
15  
16  
17  
18  
19  
20  
21  
22  
23  
24  
25  
26  
27  
28  
29  
30  
31  
32  
33  
34  
35  
36  
37  
38  
39  
40  
41  
42  
43  
44  
45  
46  
47  
48  
49  
50  
51  
52  
53  
54  
55  
56  
57  
58  
59  
60



### Further comments



Copyright property of the International Benchmarking Partnership (ICBP) and Module 4 collaborators. Usage must be authorised



Name (and title):

Signature:

Date:

Are you a ... (please tick below):

Sample



|                           |                                     |
|---------------------------|-------------------------------------|
| Surgeon                   | <input checked="" type="checkbox"/> |
| Medical Oncologist        | <input type="checkbox"/>            |
| Clinical Oncologist       | <input type="checkbox"/>            |
| Clinical Nurse Specialist | <input type="checkbox"/>            |
| Other (please specify):   | <input type="checkbox"/>            |

**Thank you very much for taking the time to complete this questionnaire.**

Copyright property of the International Benchmarking Partnership (ICBP) and Module 4 collaborators. Usage must be authorised

1 **Appendix B:**  
2

3 **Rules for missing, incomplete, multiple response and out of range data**  
4

|    |    |                                                                                                                                                                                                                                                                                                                                    |
|----|----|------------------------------------------------------------------------------------------------------------------------------------------------------------------------------------------------------------------------------------------------------------------------------------------------------------------------------------|
| 5  | 6  | 1. <u>Oversampling</u><br>To handle oversampling in Ontario, include only the first 315 consecutive lung cancer patients;                                                                                                                                                                                                          |
| 7  | 8  | 2. <u>Language/Participation in study/Presence of cancer</u><br>Exclude patients who checked “No, I don’t understand the language” or “I don’t want to participate in this study” or “I don’t have cancer”.                                                                                                                        |
| 9  | 10 | 3. <u>Survey responders</u><br>a) Exclude Patient/PCP/Specialist survey from the analysis, if it was not written by Patient/PCP/Specialist (example: a medical oncologist completed a PCP survey);<br>b) In the case of duplicates, include only the first survey (example: 2 specialists completed surveys for the same patient). |
| 11 | 12 | 4. <u>Gender</u><br>Exclude patients with unknown Gender.                                                                                                                                                                                                                                                                          |
| 13 | 14 | 5. <u>Age</u><br>a) Exclude patients with unknown age;<br>b) Exclude patients younger 40 years;<br>c) Use registry data, if Age is reported by both patient and registry.                                                                                                                                                          |
| 15 | 16 | 6. <u>No cancer or Previous cancer in the same organ</u><br>a) Exclude patients with no cancer based on registry data;<br>b) Exclude patients with previous cancer in the same organ based on data from registry or free-text for Presentation in the patient survey.                                                              |
| 17 | 18 | 7. <u>Date of consent</u><br>Exclude patients with date of consent which is unknown, before 01.01.2013 or in the future.                                                                                                                                                                                                           |
| 19 | 20 | 8. <u>Multiple responses to Dates</u><br>If multiple responses were given to the dates (of first symptom; first presentation to primary care; referral; diagnosis; treatment start), then use the earliest date.                                                                                                                   |
| 21 | 22 | 9. <u>Order of Dates</u><br>The dates must be in the following order –<br><br>First symptom; first presentation to Primary Care; referral; diagnosis; treatment start.<br><br>If not, check for mistakes.                                                                                                                          |

|    |                                                                                                      |
|----|------------------------------------------------------------------------------------------------------|
| 1  |                                                                                                      |
| 2  |                                                                                                      |
| 3  |                                                                                                      |
| 4  | <b>10. <u>Date of first symptom</u></b>                                                              |
| 5  | Date of first symptom is defined as date of first symptom from patient data.                         |
| 6  |                                                                                                      |
| 7  |                                                                                                      |
| 8  | <b>11. <u>Date of first presentation</u></b>                                                         |
| 9  | Date of first presentation to Primary Care is defined as (in the order of declining priority):       |
| 10 | a) date of first presentation to Primary Care from PCP data;                                         |
| 11 | b) date of first presentation to Primary Care and A&E from PCP data;                                 |
| 12 | c) date of first presentation to Primary Care from patient data.                                     |
| 13 |                                                                                                      |
| 14 |                                                                                                      |
| 15 |                                                                                                      |
| 16 | <b>12. <u>Date of referral</u></b>                                                                   |
| 17 | Date of referral is defined as date of referral from PCP data.                                       |
| 18 |                                                                                                      |
| 19 |                                                                                                      |
| 20 |                                                                                                      |
| 21 |                                                                                                      |
| 22 |                                                                                                      |
| 23 | <b>13. <u>Date of diagnosis</u></b>                                                                  |
| 24 | <i>Definition</i>                                                                                    |
| 25 | a) If Registry reports both date of histological confirmation and date of confirming investigation,  |
| 26 | then use date of histological confirmation.                                                          |
| 27 | b) Date of diagnosis (based on patient data, PCP data, specialist data, registry data) is defined as |
| 28 | (in the order of declining priority):                                                                |
| 29 | - date of diagnosis from registry;                                                                   |
| 30 | - date of histological confirmation (from specialist data, PCP data);                                |
| 31 | - date of biopsy (from specialist data, PCP data);                                                   |
| 32 | - date of confirming investigation (from specialist data, PCP data);                                 |
| 33 | - date of first hospital admission (from specialist data, PCP data);                                 |
| 34 | - date of MDT confirmation (from specialist data, PCP data);                                         |
| 35 | - date patient was told (from specialist data, PCP data);                                            |
| 36 | - other date of diagnosis (from specialist data, PCP data, patient data);                            |
| 37 |                                                                                                      |
| 38 |                                                                                                      |
| 39 |                                                                                                      |
| 40 |                                                                                                      |
| 41 | Choose a Date from a lower level of hierarchy, if the Date from a higher level is after the Date of  |
| 42 | consent or more than 9 months (=271 days) before the Date of consent.                                |
| 43 |                                                                                                      |
| 44 |                                                                                                      |
| 45 |                                                                                                      |
| 46 |                                                                                                      |
| 47 | <i>Exclusion criteria</i>                                                                            |
| 48 |                                                                                                      |
| 49 |                                                                                                      |
| 50 | a) Unknown date of diagnosis;                                                                        |
| 51 | b) Date of diagnosis is after the date of consent;                                                   |
| 52 | c) Date of diagnosis is more than 9 months before the Date of consent.                               |
| 53 |                                                                                                      |
| 54 |                                                                                                      |
| 55 |                                                                                                      |
| 56 | <b>14. <u>Date of treatment start</u></b>                                                            |
| 57 | a) Date of treatment start from patient data is defined as the earliest of the treatment dates for   |
| 58 | Surgery, Chemo, Radio and Other;                                                                     |
| 59 | b) Date of treatment start (based on registry data, specialist data, patient data) is defined as (in |
| 60 | the order of declining priority):                                                                    |

- date of treatment start from registry data,
- date of treatment start from specialist data,
- date of treatment start from patient data,
- anticipated date of treatment from patient data.

#### 15. Imputation of missing day in the date

Imputation rules for missing day (given month and year are known):

- a) Set missing day to '16';
- b) Consider adjacent dates in a backwards order (from "Treatment" to "First symptom"). For each pair of such adjacent dates: If dates are not in a logical order (e.g. "Treatment" is before "Diagnosis"), but month and year are the same in both dates, and the day was imputed to '16' in one of the dates:
  - Recode the day imputed earlier to '16' to the day from the adjacent date.

#### 16. Considering time

If patient gave multiple answers to the "How long did you have symptoms before contacting a doctor?" question, then use the option with the shortest time interval.

#### 17. Delay arranging appointment

If patient gave multiple answers to the "How long did it take to get an appointment with PCP?" question, then use the option with the shortest time interval.

#### 18. Duration of symptoms

If PCP gave multiple answers to the "Duration of symptoms" question, then use the option with the shortest time interval.

#### 19. Definition of Presentation

##### A. *Define Presentation within a Data Source*

1. Review the free-text for Presentation (Patient, PCP sources) and re-code, if possible.
2. If PCP reports 'Other' as Presentation and at least one symptom (or "Duration of Symptoms") or if Patient reports 'Other' as Presentation and at least one symptom (or date of first symptom or "Consider waiting time" or "Delay arranging appointment"), then re-code the Presentation in the corresponding data source to 'Unknown'- option.
3. In the case of multiple Presentation responses (Patient, PCP sources) - use a single option (in the order of declining priority):
  - a) 'VisitPCP and AE',
  - b) 'VisitPCP', 'AE' (if both 'VisitPCP' and 'AE' are given, then re-code as 'VisitPCP and AE'),
  - c) 'Unknown',
  - d) 'Investigation for another problem',
  - e) 'Other'

##### B. *Define Presentation from Alternative Data*

If Presentation hasn't been reported in either of data sources, then define it 'Unknown', if PCP reports at least one symptom (or "Duration of symptoms"); or if Patient reports at least one symptom (or date of first symptom or "Consider waiting time" or "Delay arranging appointment");

**C. Define Presentation from Data Source Hierarchy**

1. In all jurisdictions, except Sweden – use Presentation data from (in the order of declining priority):
  - a) PCP data;
  - b) Patient data;
2. In Sweden – use Presentation data from Patient data.

**20. Patient interval**

The Patient interval is defined as (in the order of declining priority):

- a) "Date of first presentation to Primary Care" (rule 11) minus "Date of first symptom" (rule 10);
- b) If the interval in (a) is unknown or negative: Calculate the interval as the low boundary of "Considering time" (rule 16) plus the low boundary of "Delay arranging appointment" (rule 17);
- c) If the interval in (a) is unknown or negative and the interval in (b) is unknown: Calculate the interval as the low boundary of "Duration of symptoms interval" (rule 18).

**21. Primary Care interval**

The Primary Care interval is defined as "Date of referral" (rule 12) minus "Date of first presentation to Primary Care" (rule 11).

**22. Diagnostic interval**

- a) The Diagnostic interval is defined as "Date of diagnosis" (rule 13) minus "Date of first presentation to Primary Care" (rule 11).

**23. Treatment interval**

The Treatment interval is defined as "Date of treatment start" (rule 14) minus "Date of diagnosis" (rule 13).

**24. Total interval**

- a) The Total interval is defined as "Date of treatment start" (rule 14) minus "Date of first symptom" (rule 10).

**25. Range of Time intervals**

The time intervals (Patient, Primary Care, Diagnosis, Treatment, Total) must be in range 0-1 year.

If > 1 year: set the interval to 365 days

If negative: set the interval to 0.

|                                                                                                    |                                                                                                                                                                                                                                                                                                                                                                                                                                                                                                                                                                                                                                                                                                                                                                       |
|----------------------------------------------------------------------------------------------------|-----------------------------------------------------------------------------------------------------------------------------------------------------------------------------------------------------------------------------------------------------------------------------------------------------------------------------------------------------------------------------------------------------------------------------------------------------------------------------------------------------------------------------------------------------------------------------------------------------------------------------------------------------------------------------------------------------------------------------------------------------------------------|
| 1<br>2<br>3<br>4<br>5<br>6<br>7<br>8                                                               | <p><b>26. <u>Number of visits</u></b><br/>If patient gave multiple answers to the “Number of visits” questions, then use the option with a fewer number of visits.</p>                                                                                                                                                                                                                                                                                                                                                                                                                                                                                                                                                                                                |
| 9<br>10<br>11<br>12<br>13<br>14                                                                    | <p><b>27. <u>Specialist waiting time interval</u></b><br/>If patient gave multiple answers to the “How long did it take to get an appointment with specialist?” question, then use the option with the shortest time interval.</p>                                                                                                                                                                                                                                                                                                                                                                                                                                                                                                                                    |
| 15<br>16<br>17<br>18<br>19                                                                         | <p><b>28. <u>Type of treatment</u></b><br/>If patient ticked both “Yes” and “No” as answers to the “Type of treatment (Surgery, Chemotherapy, Radiotherapy)” questions, then choose “Yes” answer.</p>                                                                                                                                                                                                                                                                                                                                                                                                                                                                                                                                                                 |
| 20<br>21<br>22<br>23<br>24<br>25                                                                   | <p><b>29. <u>Health state</u></b><br/>If patient gave multiple answers to the “Health state” question, then use the option with a better health condition.</p>                                                                                                                                                                                                                                                                                                                                                                                                                                                                                                                                                                                                        |
| 26<br>27<br>28<br>29<br>30<br>31<br>32                                                             | <p><b>30. <u>Comorbidity</u></b></p> <ul style="list-style-type: none"> <li>a) If patient ticked both “Yes” and “No” as answers to the “Comorbidity (Heart disease, Stroke, Lung disease, Diabetes)” questions, then choose “Yes” answer;</li> <li>b) If both patient and PCP report “Comorbidity”, then use the PCP Data.</li> </ul>                                                                                                                                                                                                                                                                                                                                                                                                                                 |
| 33<br>34<br>35<br>36<br>37<br>38<br>39<br>40<br>41<br>42<br>43<br>44<br>45<br>46<br>47<br>48<br>49 | <p><b>31. <u>Ethnicity</u></b></p> <ul style="list-style-type: none"> <li>a) If patient didn’t report “Ethnicity”, then use the information from (in the order of declining priority): <ul style="list-style-type: none"> <li>- “Ethnicity_Other_Details”;</li> <li>- “Other main language spoken at home”;</li> <li>- “The main language spoken at home” (only for Victoria);</li> <li>- “The main language spoken at home is the chief one for this jurisdiction”=“Yes” given “Main language spoken at home is other than the main one for this jurisdiction”=“No”;</li> </ul> </li> <li>b) Consider Ethnicity as unknown, if answers to the “Ethnicity” question are multiple and belong to different categories ( ‘white’, ‘Asian’, ‘black’, ‘other’).</li> </ul> |
| 50<br>51<br>52<br>53<br>54                                                                         | <p><b>32. <u>Education</u></b><br/>If patient gave multiple answers to the “Education” question, then use the option with a higher level of education.</p>                                                                                                                                                                                                                                                                                                                                                                                                                                                                                                                                                                                                            |
| 55<br>56<br>57<br>58<br>59<br>60                                                                   | <p><b>33. <u>Smoking Current</u></b></p> <ul style="list-style-type: none"> <li>a) If patient ticked both “Yes” and “No” as answers to the “Smoking Current” question, then use “Yes” answer;</li> <li>b) If patient hasn’t ticked neither “Yes” nor “No”, then consider this case as Unknown.</li> </ul>                                                                                                                                                                                                                                                                                                                                                                                                                                                             |

1  
2  
3  
4 **34. Smoking Number**

5 If patient reports "SmokingNumber" as text, then re-code using following rules:

- 6 a) Where there is a number smoked /day – accept number;  
7 b) Where a range has been given – take the upper value;  
8 c) Where patient has put 10+ or 20+ - capture this as 11 or 21;  
9 d) Where number of cigarettes smoked in the past and currently being smoked are provided -  
10 average the numbers;  
11 e) Non entries code as "." ;  
12 f) Non-smokers (eg, "nil", "N/A") are coded as "0".  
13  
14  
15  
16

17 **35. Smoked ever**

- 18 a) If patient ticked both "Yes" and "No" as answers to the "Smoking ever" question, then use  
19 "Yes" answer;  
20 b) If patient hasn't ticked neither "Yes" nor "No": consider it as "Yes", if patient is a current  
21 smoker ("Smoking\_Current="Yes") or has specified a number of cigarettes  
22 ("SmokingNumber">0). Otherwise consider this case as Unknown.  
23 c) If patient has ticked "No": recode it to "Yes", if patient is a current smoker  
24 ("Smoking\_Current="Yes").  
25  
26  
27

28 **36. Nature of referral**

- 29 a) Review free-text for "Nature of referral" (PCP Data) and re-code, if possible;  
30 b) In the case of multiple responses, use a single option as (in the order of declining priority):  
31  
32  
33 - "Referral for immediate admission";  
34 - "Urgent referral";  
35 - "Less urgent referral";  
36 - "General referral" ;  
37 - "No referral";  
38 - "Other".  
39  
40  
41

42 **37. Refer Public or Private**

- 43 a) If PCP ticked both "Public" and "Private" as answers to the "Refer Public or Private" question,  
44 then use "Private" answer;  
45 b) If PCP hasn't ticked neither "Public" nor "Private", then consider this case as Unknown.  
46  
47  
48

49 **38. Type of referral**

50 If specialist gave multiple responses to the "How was the patient referred..." question, then use a  
51 single option (in the order of declining priority):  
52

- 53  
54 - "Respiratory clinic";  
55 - "Specialist/consultant";  
56  
57 - "PCP";  
58 - "Other".  
59  
60

1  
2  
3  
4  
5  
6  
7  
8  
9  
10  
11  
12  
13  
14  
15  
16  
17  
18  
19  
20  
21  
22  
23  
24  
25  
26  
27  
28  
29  
30  
31  
32  
33  
34  
35  
36  
37  
38  
39  
40  
41  
42  
43  
44  
45  
46  
47  
48  
49  
50  
51  
52  
53  
54  
55  
56  
57  
58  
59  
60

39. First Attendance Place

If specialist gave multiple responses to the “First Attendance Place” question, then consider this case as Unknown.

40. Stage-TNM

- a) If specialist gave multiple responses to the “Stage\_TNM” question, then use the highest category;
  - b) If registry gave multiple responses to the “Stage\_TNM”, then use a single option (in the order of declining priority):
    - stage at time of diagnosis
    - stage at surgery
    - stage at oncology
  - c) If “Stage\_TNM” is reported by both the specialist and registry, then use the registry data.
- For peer review only

## Appendix C: Supplementary Tables

**C 1:** Classification of lung cancer -specific symptoms reported by patients into cancer specific and non- cancer specific

### Cancer specific symptoms

|                                               |
|-----------------------------------------------|
| 1 persistent cough                            |
| 2 chest infection that wouldn't get better    |
| 3 coughing up blood-stained phlegm (sputum)   |
| 4 breathlessness                              |
| 5 chest or shoulder pain                      |
| 6 a hoarse voice                              |
| 7 difficulty swallowing                       |
| 8 swelling of lymph nodes (glands) in my neck |
| 9 ends of fingers becoming larger             |
| 10 breast and axilla swelling (in men)        |

### Non-cancer specific symptoms

|                                                                  |
|------------------------------------------------------------------|
| 1 a dull ache or sharp pain when I coughed or took a deep breath |
| 2 pain/discomfort under my ribs                                  |
| 3 face swelling                                                  |
| 4 blood clots (thrombosis)                                       |
| 5 pins and needles or numbness in fingers                        |
| 6 weight loss                                                    |
| 7 felt sick/vomiting/nausea/loss of appetite                     |
| 8 fatigue                                                        |
| 9 muscle weakness                                                |
| 10 drowsiness, weakness, dizziness or confusion                  |
| 11 high temperature (fever) of 38C (100.4F)                      |
| 12 other                                                         |

**C2:** Time intervals (days) depicted as median, 75<sup>th</sup> and 90<sup>th</sup> centiles for each of the ten jurisdictions. In Sweden, no data was available on primary care interval

| Intervals             | Centiles                 | Wales | Denmark | Sweden | England | N Ireland | Scotland | Manitoba | Ontario |
|-----------------------|--------------------------|-------|---------|--------|---------|-----------|----------|----------|---------|
| Patient Interval      | Number                   | 181   | 233     | 172    | 213     | 179       | 169      | 133      | 205     |
|                       | Median                   | 21    | 14      | 21     | 17      | 18        | 21       | 25       | 22      |
|                       | 75 <sup>th</sup> centile | 61    | 53      | 61     | 65      | 60        | 60       | 67       | 61      |
|                       | 90 <sup>th</sup> centile | 216   | 180     | 214    | 205     | 240       | 267      | 180      | 187     |
| Primary Care interval | Number                   | 110   | 159     | n/a    | 147     | 124       | 119      | 80       | 75      |
|                       | Median                   | 20    | 7       |        | 11      | 13        | 16       | 30       | 29      |
|                       | 75 <sup>th</sup> centile | 43    | 20      |        | 31      | 51        | 35       | 75       | 73      |
|                       | 90 <sup>th</sup> centile | 91    | 64      |        | 73      | 112       | 90       | 138      | 183     |
| Diagnostic interval   | Number                   | 176   | 229     | 165    | 212     | 170       | 173      | 138      | 212     |
|                       | Median                   | 45    | 35      | 28     | 54      | 65        | 42       | 87       | 57      |
|                       | 75 <sup>th</sup> centile | 108   | 67      | 83     | 100     | 122       | 106      | 147      | 122     |
|                       | 90 <sup>th</sup> centile | 162   | 162     | 143    | 161     | 281       | 198      | 265      | 331     |
| Treatment interval    | Number                   | 192   | 279     | 190    | 238     | 200       | 187      | 182      | 263     |
|                       | Median                   | 43    | 16      | 34     | 22      | 32        | 42       | 19       | 47      |
|                       | 75 <sup>th</sup> centile | 64    | 25      | 59     | 41      | 48        | 62       | 56       | 70      |
|                       | 90 <sup>th</sup> centile | 89    | 37      | 77     | 56      | 72        | 90       | 97       | 96      |
| Total interval        | Number                   | 147   | 192     | 147    | 176     | 157       | 143      | 117      | 178     |
|                       | Median                   | 116   | 67      | 107    | 114     | 105       | 117      | 127      | 130     |
|                       | 75 <sup>th</sup> centile | 204   | 116     | 190    | 183     | 227       | 253      | 216      | 216     |
|                       | 90 <sup>th</sup> centile | 365   | 210     | 329    | 323     | 365       | 365      | 365      | 339     |

**C3:** Data sources used to define dates and percentage of imputed dates

| Type of date                              | Data sources used to define a date* (%) |     |     |          | Cases with imputed day in a date** (%) |
|-------------------------------------------|-----------------------------------------|-----|-----|----------|----------------------------------------|
|                                           | Patient                                 | PCP | CST | Registry |                                        |
| First noticing symptoms                   | 100                                     | 0   | 0   | 0        | 66                                     |
| First presentation to health care         | 49                                      | 51  | 0   | 0        | 30                                     |
| First referral to secondary care          | 0                                       | 100 | 0   | 0        | 1                                      |
| Diagnosis                                 | 5                                       | 6   | 8   | 81       | 1                                      |
| Start of curative or palliative treatment | 55                                      | 0   | 32  | 13       | 11                                     |

\* based on rules 10-14, supplementary file Appendix B

\*\* based on rule 15, supplementary file Appendix B

For peer review only

**C4.** Percentages of negative intervals set to 0, large intervals (>365 days) set to 365 days, and intervals based not on dates

| Type of interval | Negative intervals set to 0 days* (%) | Intervals >365 days set to 365 days* (%) | Intervals where variables other than dates were used (%)** |
|------------------|---------------------------------------|------------------------------------------|------------------------------------------------------------|
| Patient          | <1                                    | 5                                        | 29                                                         |
| Primary care     | 4                                     | 2                                        | 0                                                          |
| Diagnosis        | 6                                     | 5                                        | 0                                                          |
| Treatment        | 6                                     | <1                                       | 0                                                          |
| Total            | 2                                     | 9                                        | 0                                                          |

\* based on rule 25, supplementary file Appendix B

\* based on rule 20b,c, supplementary file Appendix B

For peer review only

1  
2  
3  
4  
5  
6  
7  
8  
9  
10  
11  
12  
13  
14  
15  
16  
17  
18  
19  
20  
21  
22  
23  
24  
25  
26  
27  
28  
29  
30  
31  
32  
33  
34  
35  
36  
37  
38  
39  
40  
41  
42  
43  
44  
45  
46

For peer review only

**The RECORD statement – checklist of items, extended from the STROBE statement, that should be reported in observational studies using routinely collected health data.**

|                           | Item No. | STROBE items                                                                                                                                                                               | Location in manuscript where items are reported | RECORD items                                                                                                                                                                                                                                                                                                                                                                                                                                | Location in manuscript where items are reported |
|---------------------------|----------|--------------------------------------------------------------------------------------------------------------------------------------------------------------------------------------------|-------------------------------------------------|---------------------------------------------------------------------------------------------------------------------------------------------------------------------------------------------------------------------------------------------------------------------------------------------------------------------------------------------------------------------------------------------------------------------------------------------|-------------------------------------------------|
| <b>Title and abstract</b> |          |                                                                                                                                                                                            |                                                 |                                                                                                                                                                                                                                                                                                                                                                                                                                             |                                                 |
|                           | 1        | (a) Indicate the study's design with a commonly used term in the title or the abstract (b) Provide in the abstract an informative and balanced summary of what was done and what was found | Title and abstract – p 1 and 3                  | RECORD 1.1: The type of data used should be specified in the title or abstract. When possible, the name of the databases used should be included.<br><br>RECORD 1.2: If applicable, the geographic region and timeframe within which the study took place should be reported in the title or abstract.<br><br>RECORD 1.3: If linkage between databases was conducted for the study, this should be clearly stated in the title or abstract. | Abstract – p 3<br><br>Abstract – p 3<br><br>N/A |
| <b>Introduction</b>       |          |                                                                                                                                                                                            |                                                 |                                                                                                                                                                                                                                                                                                                                                                                                                                             |                                                 |
| Background rationale      | 2        | Explain the scientific background and rationale for the investigation being reported                                                                                                       | Introduction – p 6                              |                                                                                                                                                                                                                                                                                                                                                                                                                                             |                                                 |
| Objectives                | 3        | State specific objectives, including any prespecified hypotheses                                                                                                                           | Introduction – p 6                              |                                                                                                                                                                                                                                                                                                                                                                                                                                             |                                                 |
| <b>Methods</b>            |          |                                                                                                                                                                                            |                                                 |                                                                                                                                                                                                                                                                                                                                                                                                                                             |                                                 |
| Study Design              | 4        | Present key elements of study design early in the paper                                                                                                                                    | Methods – p 6                                   |                                                                                                                                                                                                                                                                                                                                                                                                                                             |                                                 |
| Setting                   | 5        | Describe the setting, locations, and relevant dates, including periods of recruitment, exposure, follow-up, and data collection                                                            | Methods – p 6-8                                 |                                                                                                                                                                                                                                                                                                                                                                                                                                             |                                                 |
| Participants              | 6        | (a) <i>Cohort study</i> - Give the eligibility criteria, and the                                                                                                                           | Methods – p 6 – and as reference to             | RECORD 6.1: The methods of study population selection (such as codes or                                                                                                                                                                                                                                                                                                                                                                     | Provided as reference to                        |

|                              |   |                                                                                                                                                                                                                                                                                                                                                                                                                                                                                                                                                                                                                                                             |                                                             |                                                                                                                                                                                                                                                                                                                                                                                                                                                                                                                                                                                                                              |                                                                                                   |
|------------------------------|---|-------------------------------------------------------------------------------------------------------------------------------------------------------------------------------------------------------------------------------------------------------------------------------------------------------------------------------------------------------------------------------------------------------------------------------------------------------------------------------------------------------------------------------------------------------------------------------------------------------------------------------------------------------------|-------------------------------------------------------------|------------------------------------------------------------------------------------------------------------------------------------------------------------------------------------------------------------------------------------------------------------------------------------------------------------------------------------------------------------------------------------------------------------------------------------------------------------------------------------------------------------------------------------------------------------------------------------------------------------------------------|---------------------------------------------------------------------------------------------------|
|                              |   | <p>sources and methods of selection of participants. Describe methods of follow-up</p> <p><i>Case-control study</i> - Give the eligibility criteria, and the sources and methods of case ascertainment and control selection. Give the rationale for the choice of cases and controls</p> <p><i>Cross-sectional study</i> - Give the eligibility criteria, and the sources and methods of selection of participants</p> <p><i>(b) Cohort study</i> - For matched studies, give matching criteria and number of exposed and unexposed</p> <p><i>Case-control study</i> - For matched studies, give matching criteria and the number of controls per case</p> | <p>previous paper.</p> <p>N/A</p>                           | <p>algorithms used to identify subjects) should be listed in detail. If this is not possible, an explanation should be provided.</p> <p>RECORD 6.2: Any validation studies of the codes or algorithms used to select the population should be referenced. If validation was conducted for this study and not published elsewhere, detailed methods and results should be provided.</p> <p>RECORD 6.3: If the study involved linkage of databases, consider use of a flow diagram or other graphical display to demonstrate the data linkage process, including the number of individuals with linked data at each stage.</p> | <p>previous paper.</p> <p>Provided as appendix and in reference to previous paper.</p> <p>N/A</p> |
| Variables                    | 7 | Clearly define all outcomes, exposures, predictors, potential confounders, and effect modifiers. Give diagnostic criteria, if applicable.                                                                                                                                                                                                                                                                                                                                                                                                                                                                                                                   | Methods – p 6-9 – and as reference to previous paper.       | RECORD 7.1: A complete list of codes and algorithms used to classify exposures, outcomes, confounders, and effect modifiers should be provided. If these cannot be reported, an explanation should be provided.                                                                                                                                                                                                                                                                                                                                                                                                              | N/A                                                                                               |
| Data sources/<br>measurement | 8 | For each variable of interest, give sources of data and details of methods of assessment (measurement). Describe comparability of assessment methods if there is more than one group                                                                                                                                                                                                                                                                                                                                                                                                                                                                        | Methods – p 6-9 – and as reference to previous paper.       |                                                                                                                                                                                                                                                                                                                                                                                                                                                                                                                                                                                                                              |                                                                                                   |
| Bias                         | 9 | Describe any efforts to address potential sources of bias                                                                                                                                                                                                                                                                                                                                                                                                                                                                                                                                                                                                   | Methods – p 7-8, discussion – p 24-25 – and as reference to |                                                                                                                                                                                                                                                                                                                                                                                                                                                                                                                                                                                                                              |                                                                                                   |

1  
2  
3  
4  
5  
6  
7  
8  
9  
10  
11  
12  
13  
14  
15  
16  
17  
18  
19  
20  
21  
22  
23  
24  
25  
26  
27  
28  
29  
30  
31  
32  
33  
34  
35  
36  
37  
38  
39  
40  
41  
42  
43  
44  
45  
46  
47

|                                  |    |                                                                                                                                                                                                                                                                                                                                                                                                                                                                                                                                                                      |                                                       |                                                                                                                                                       |     |
|----------------------------------|----|----------------------------------------------------------------------------------------------------------------------------------------------------------------------------------------------------------------------------------------------------------------------------------------------------------------------------------------------------------------------------------------------------------------------------------------------------------------------------------------------------------------------------------------------------------------------|-------------------------------------------------------|-------------------------------------------------------------------------------------------------------------------------------------------------------|-----|
|                                  |    |                                                                                                                                                                                                                                                                                                                                                                                                                                                                                                                                                                      | previous paper.                                       |                                                                                                                                                       |     |
| Study size                       | 10 | Explain how the study size was arrived at                                                                                                                                                                                                                                                                                                                                                                                                                                                                                                                            | Methods – p 6 – and as reference to previous paper.   |                                                                                                                                                       |     |
| Quantitative variables           | 11 | Explain how quantitative variables were handled in the analyses. If applicable, describe which groupings were chosen, and why                                                                                                                                                                                                                                                                                                                                                                                                                                        | Methods – p 6-8 – and as reference to previous paper. |                                                                                                                                                       |     |
| Statistical methods              | 12 | (a) Describe all statistical methods, including those used to control for confounding<br>(b) Describe any methods used to examine subgroups and interactions<br>(c) Explain how missing data were addressed<br>(d) <i>Cohort study</i> - If applicable, explain how loss to follow-up was addressed<br><i>Case-control study</i> - If applicable, explain how matching of cases and controls was addressed<br><i>Cross-sectional study</i> - If applicable, describe analytical methods taking account of sampling strategy<br>(e) Describe any sensitivity analyses | Methods – p 8 – and as reference to previous paper.   |                                                                                                                                                       |     |
| Data access and cleaning methods |    | ..                                                                                                                                                                                                                                                                                                                                                                                                                                                                                                                                                                   |                                                       | RECORD 12.1: Authors should describe the extent to which the investigators had access to the database population used to create the study population. | N/A |

|                  |    |                                                                                                                                                                                                                                                                                                                                                 |                                                                             |                                                                                                                                                                                                                                                                                                                    |                                                                               |
|------------------|----|-------------------------------------------------------------------------------------------------------------------------------------------------------------------------------------------------------------------------------------------------------------------------------------------------------------------------------------------------|-----------------------------------------------------------------------------|--------------------------------------------------------------------------------------------------------------------------------------------------------------------------------------------------------------------------------------------------------------------------------------------------------------------|-------------------------------------------------------------------------------|
|                  |    |                                                                                                                                                                                                                                                                                                                                                 |                                                                             | RECORD 12.2: Authors should provide information on the data cleaning methods used in the study.                                                                                                                                                                                                                    | Methods – p 7                                                                 |
| Linkage          |    | ..                                                                                                                                                                                                                                                                                                                                              |                                                                             | RECORD 12.3: State whether the study included person-level, institutional-level, or other data linkage across two or more databases. The methods of linkage and methods of linkage quality evaluation should be provided.                                                                                          | N/A                                                                           |
| <b>Results</b>   |    |                                                                                                                                                                                                                                                                                                                                                 |                                                                             |                                                                                                                                                                                                                                                                                                                    |                                                                               |
| Participants     | 13 | (a) Report the numbers of individuals at each stage of the study ( <i>e.g.</i> , numbers potentially eligible, examined for eligibility, confirmed eligible, included in the study, completing follow-up, and analysed)<br>(b) Give reasons for non-participation at each stage.<br>(c) Consider use of a flow diagram                          | Results and as table – p 10-11. Flow diagram in previous paper, referenced. | RECORD 13.1: Describe in detail the selection of the persons included in the study ( <i>i.e.</i> , study population selection) including filtering based on data quality, data availability and linkage. The selection of included persons can be described in the text and/or by means of the study flow diagram. | Results – p 10-15 - and as table. Flow diagram in previous paper, referenced. |
| Descriptive data | 14 | (a) Give characteristics of study participants ( <i>e.g.</i> , demographic, clinical, social) and information on exposures and potential confounders<br>(b) Indicate the number of participants with missing data for each variable of interest<br>(c) <i>Cohort study</i> - summarise follow-up time ( <i>e.g.</i> , average and total amount) | Results and as table – p 10-15.                                             |                                                                                                                                                                                                                                                                                                                    |                                                                               |
| Outcome data     | 15 | <i>Cohort study</i> - Report numbers of outcome events or summary measures over time<br><i>Case-control study</i> - Report numbers in each exposure category, or summary measures                                                                                                                                                               | Results and as table – p 16-23.                                             |                                                                                                                                                                                                                                                                                                                    |                                                                               |

|                   |    |                                                                                                                                                                                                                                                                                                                                                                                                                 |                                 |                                                                                                                                                                                                                                                                                                          |                     |
|-------------------|----|-----------------------------------------------------------------------------------------------------------------------------------------------------------------------------------------------------------------------------------------------------------------------------------------------------------------------------------------------------------------------------------------------------------------|---------------------------------|----------------------------------------------------------------------------------------------------------------------------------------------------------------------------------------------------------------------------------------------------------------------------------------------------------|---------------------|
|                   |    | of exposure<br><i>Cross-sectional study</i> - Report numbers of outcome events or summary measures                                                                                                                                                                                                                                                                                                              |                                 |                                                                                                                                                                                                                                                                                                          |                     |
| Main results      | 16 | (a) Give unadjusted estimates and, if applicable, confounder-adjusted estimates and their precision (e.g., 95% confidence interval). Make clear which confounders were adjusted for and why they were included<br>(b) Report category boundaries when continuous variables were categorized<br>(c) If relevant, consider translating estimates of relative risk into absolute risk for a meaningful time period | Results and as table – p 21-23. |                                                                                                                                                                                                                                                                                                          |                     |
| Other analyses    | 17 | Report other analyses done—e.g., analyses of subgroups and interactions, and sensitivity analyses                                                                                                                                                                                                                                                                                                               | Results – p 23.                 |                                                                                                                                                                                                                                                                                                          |                     |
| <b>Discussion</b> |    |                                                                                                                                                                                                                                                                                                                                                                                                                 |                                 |                                                                                                                                                                                                                                                                                                          |                     |
| Key results       | 18 | Summarise key results with reference to study objectives                                                                                                                                                                                                                                                                                                                                                        | Discussion – p 24               |                                                                                                                                                                                                                                                                                                          |                     |
| Limitations       | 19 | Discuss limitations of the study, taking into account sources of potential bias or imprecision. Discuss both direction and magnitude of any potential bias                                                                                                                                                                                                                                                      | Discussion – p24-25             | RECORD 19.1: Discuss the implications of using data that were not created or collected to answer the specific research question(s). Include discussion of misclassification bias, unmeasured confounding, missing data, and changing eligibility over time, as they pertain to the study being reported. | Discussion – p24-25 |
| Interpretation    | 20 | Give a cautious overall interpretation of results considering objectives, limitations, multiplicity of analyses, results from similar                                                                                                                                                                                                                                                                           | Discussion – p25-28             |                                                                                                                                                                                                                                                                                                          |                     |

|                                                           |    |                                                                                                                                                               |                                  |                                                                                                                                                          |                                                    |
|-----------------------------------------------------------|----|---------------------------------------------------------------------------------------------------------------------------------------------------------------|----------------------------------|----------------------------------------------------------------------------------------------------------------------------------------------------------|----------------------------------------------------|
|                                                           |    | studies, and other relevant evidence                                                                                                                          |                                  |                                                                                                                                                          |                                                    |
| Generalisability                                          | 21 | Discuss the generalisability (external validity) of the study results                                                                                         | Discussion, conclusion – p25-29. |                                                                                                                                                          |                                                    |
| <b>Other Information</b>                                  |    |                                                                                                                                                               |                                  |                                                                                                                                                          |                                                    |
| Funding                                                   | 22 | Give the source of funding and the role of the funders for the present study and, if applicable, for the original study on which the present article is based | Funding statement – p 31         |                                                                                                                                                          |                                                    |
| Accessibility of protocol, raw data, and programming code |    | ..                                                                                                                                                            |                                  | RECORD 22.1: Authors should provide information on how to access any supplemental information such as the study protocol, raw data, or programming code. | Availability of data and material statement – p 31 |

\*Reference: Benchimol EI, Smeeth L, Guttman A, Harron K, Moher D, Petersen I, Sørensen HT, von Elm E, Langan SM, the RECORD Working Committee. The REporting of studies Conducted using Observational Routinely-collected health Data (RECORD) Statement. *PLoS Medicine* 2015; in press.

\*Checklist is protected under Creative Commons Attribution ([CC BY](https://creativecommons.org/licenses/by/4.0/)) license.

# BMJ Open

## Time intervals and routes to diagnosis for lung cancer in ten jurisdictions: cross-sectional study findings from the International Cancer Benchmarking Partnership (ICBP)

|                               |                                                                                                                                                                                                                                                                                                                                                                                                                                                                                                                                                                                                                                                                                                                                                                                                                                                                                                                                                                                                                                                                                                                                                                                                                                                                                                                                                                                                                                                                                                                                                                                                                                                                                                                                                                                                                                                                                                                                                                                                                                                                                                                                                   |
|-------------------------------|---------------------------------------------------------------------------------------------------------------------------------------------------------------------------------------------------------------------------------------------------------------------------------------------------------------------------------------------------------------------------------------------------------------------------------------------------------------------------------------------------------------------------------------------------------------------------------------------------------------------------------------------------------------------------------------------------------------------------------------------------------------------------------------------------------------------------------------------------------------------------------------------------------------------------------------------------------------------------------------------------------------------------------------------------------------------------------------------------------------------------------------------------------------------------------------------------------------------------------------------------------------------------------------------------------------------------------------------------------------------------------------------------------------------------------------------------------------------------------------------------------------------------------------------------------------------------------------------------------------------------------------------------------------------------------------------------------------------------------------------------------------------------------------------------------------------------------------------------------------------------------------------------------------------------------------------------------------------------------------------------------------------------------------------------------------------------------------------------------------------------------------------------|
| Journal:                      | <i>BMJ Open</i>                                                                                                                                                                                                                                                                                                                                                                                                                                                                                                                                                                                                                                                                                                                                                                                                                                                                                                                                                                                                                                                                                                                                                                                                                                                                                                                                                                                                                                                                                                                                                                                                                                                                                                                                                                                                                                                                                                                                                                                                                                                                                                                                   |
| Manuscript ID                 | bmjopen-2018-025895.R2                                                                                                                                                                                                                                                                                                                                                                                                                                                                                                                                                                                                                                                                                                                                                                                                                                                                                                                                                                                                                                                                                                                                                                                                                                                                                                                                                                                                                                                                                                                                                                                                                                                                                                                                                                                                                                                                                                                                                                                                                                                                                                                            |
| Article Type:                 | Research                                                                                                                                                                                                                                                                                                                                                                                                                                                                                                                                                                                                                                                                                                                                                                                                                                                                                                                                                                                                                                                                                                                                                                                                                                                                                                                                                                                                                                                                                                                                                                                                                                                                                                                                                                                                                                                                                                                                                                                                                                                                                                                                          |
| Date Submitted by the Author: | 18-Jul-2019                                                                                                                                                                                                                                                                                                                                                                                                                                                                                                                                                                                                                                                                                                                                                                                                                                                                                                                                                                                                                                                                                                                                                                                                                                                                                                                                                                                                                                                                                                                                                                                                                                                                                                                                                                                                                                                                                                                                                                                                                                                                                                                                       |
| Complete List of Authors:     | <p>Menon, Usha; University College London, Institute for Women's Health Vedsted, Peter; Aarhus University, Research Unit for General Practice Zalounina Falborg, Alina; Aarhus University, Research Unit for General Practice</p> <p>Jensen, Henry; Aarhus University, Research Unit for General Practice Harrison, Samantha; Cancer Research UK, Policy &amp; information Reguilon, Irene; Cancer Research UK, Policy &amp; information Barisic, Andriana; Cancer Care Ontario</p> <p>Bergin, Rebecca; Cancer Council Victoria, Centre for Behavioural Research in Cancer; University of Melbourne, Department of General Practice</p> <p>Brewster, David; Edinburgh University, Centre for Population Health Sciences; NHS Scotland National Services Division, Scottish Cancer Registry, Information Services Division</p> <p>Butler, John; The Royal Marsden</p> <p>Brustugun, Odd Terje; Oslo University Hospital, Institute for Cancer Research</p> <p>Bucher, Oliver; CancerCare Manitoba, Department of Epidemiology and Cancer Registry</p> <p>Cairnduff, Victoria; Queen's University Belfast, Northern Ireland Cancer Registry</p> <p>Gavin, Anna; Queen's University Belfast, Northern Ireland Cancer Registry</p> <p>Grunfeld, Eva; Ontario Institute for Cancer Research, Health Services Research Program</p> <p>Harland, Elizabeth; CancerCare Manitoba, Department of Epidemiology and Cancer Registry</p> <p>Kalsi, Jatinderpal; University College London, Institute for Women's Health</p> <p>Knudsen, Anne Kari; Oslo University Hospital, European Palliative Care Research Centre (PRC); University of Oslo, Institute of Clinical Medicine</p> <p>Lambe, Mats; Karolinska Institutet, Department of Medical Epidemiology; University Hospital, Regional Oncologic Center</p> <p>Law, Rebecca-Jane; Bangor University, North Wales Centre for Primary Care Research</p> <p>Lin, Yulan; University of Oslo, Institute of Clinical Medicine; Oslo University Hospital, European Palliative Care Research Centre (PRC)</p> <p>Malmberg, Martin; Skanes universitetssjukhus Lund</p> <p>Turner, Donna; CancerCare Manitoba</p> |

|                                 |                                                                                                                                                                                                                                                                                                                                                  |
|---------------------------------|--------------------------------------------------------------------------------------------------------------------------------------------------------------------------------------------------------------------------------------------------------------------------------------------------------------------------------------------------|
|                                 | Neal, Richard; Bangor University, North Wales Centre for Primary Care Research; University of Leeds, Academic Unit of Primary Care<br>White, Victoria; Cancer Council Victoria, Centre for Behavioural Research in Cancer; Deakin University, School of Psychology<br>Weller, David; Edinburgh University, Centre for Population Health Sciences |
| <b>Primary Subject Heading</b>: | Epidemiology                                                                                                                                                                                                                                                                                                                                     |
| Secondary Subject Heading:      | Global health, Oncology                                                                                                                                                                                                                                                                                                                          |
| Keywords:                       | EPIDEMIOLOGY, International health services < HEALTH SERVICES ADMINISTRATION & MANAGEMENT, Organisation of health services < HEALTH SERVICES ADMINISTRATION & MANAGEMENT, Respiratory tract tumours < ONCOLOGY, lung cancer, routes to diagnosis, time intervals, international health systems, symptomatic presentation                         |
|                                 |                                                                                                                                                                                                                                                                                                                                                  |

SCHOLARONE™  
Manuscripts

1  
2  
3 **Time intervals and routes to diagnosis for lung cancer in ten jurisdictions: cross-**  
4 **sectional study findings from the International Cancer Benchmarking Partnership**  
5 **(ICBP)**  
6  
7  
8

- 9  
10 1. Usha Menon\*, MRC Clinical Trials Unit at UCL, Institute of Clinical Trials &  
11 Methodology, University College London, London, United Kingdom  
12  
13 2. Peter Vedsted\*, Research Unit for General Practice, Aarhus University, Aarhus,  
14 Denmark  
15  
16 3. Alina Zalounina Falborg, Research Unit for General Practice, Aarhus University, Aarhus,  
17 Denmark  
18  
19 4. Henry Jensen, Research Unit for General Practice, Aarhus University, Aarhus, Denmark  
20  
21 5. Samantha Harrison, Policy and Information, Cancer Research UK, London, United  
22 Kingdom  
23  
24 6. Irene Reguilon, Policy and Information, Cancer Research UK, London, United Kingdom  
25  
26 7. Andriana Barisic, Ontario Renal Network, Cancer Care Ontario, Toronto, Canada  
27  
28 8. Rebecca J Bergin, Centre for Behavioural Research in Cancer, Cancer Council Victoria,  
29 Victoria, Australia; Department of General Practice, University of Melbourne, Victoria,  
30 Australia  
31  
32 9. David H Brewster, Scottish Cancer Registry, Information Services Division, NHS  
33 National Services Scotland, Edinburgh, United Kingdom; Centre for Population Health  
34 Sciences, University of Edinburgh, Edinburgh, United Kingdom  
35  
36 10. John Butler, The Royal Marsden, Fulham Road, London, United Kingdom  
37  
38 11. Odd Terje Brustugun, Institute for Cancer Research, Department of Cancer Genetics,  
39 Oslo University Hospital, Oslo, Norway  
40  
41 12. Oliver Bucher, Department of Epidemiology and Cancer Registry, CancerCare Manitoba,  
42 Manitoba  
43  
44 13. Victoria Cairnduff, Northern Ireland Cancer Registry, Centre for Public Health, Queen's  
45 University Belfast, Mulhouse Building, Mulhouse Road, Belfast, United Kingdom  
46  
47 14. Anna T Gavin, Northern Ireland Cancer Registry, Queen's University Belfast, Belfast,  
48 United Kingdom  
49  
50  
51  
52  
53  
54  
55  
56  
57  
58  
59  
60

15. Eva Grunfeld, Health Services Research Program, Ontario Institute for Cancer Research, Toronto, Canada
16. Elizabeth Harland, Department of Epidemiology and Cancer Registry, CancerCare Manitoba, Winnipeg, Canada
17. Jatinderpal Kalsi, Women's Cancer, Institute for Women's Health, University College London, London, United Kingdom
18. Anne Kari Knudsen, European Palliative Care Research Centre (PRC), Department of Oncology, Oslo University Hospital and Institute of Clinical Medicine, University of Oslo, Oslo, Norway
19. Mats Lambe, Regional Cancer Center Uppsala and Department of Medical Epidemiology and Biostatistics, Karolinska Institutet, Stockholm, Sweden
20. Rebecca-Jane Law, North Wales Centre for Primary Care Research, Bangor University, Wrexham, United Kingdom
21. Yulan Lin, European Palliative Care Research Centre (PRC), Department of Oncology, Oslo University Hospital and Institute of Clinical Medicine, University of Oslo, Oslo, Norway
22. Martin Malmberg, Department of Oncology, Lund University Hospital, Lund, Sweden
23. Donna Turner, Population Oncology, Cancer Care Manitoba, Winnipeg, Canada
24. Richard D Neal, North Wales Centre for Primary Care Research, Bangor University, Wrexham, United Kingdom; Academic Unit of Primary Care, University of Leeds, Leeds, United Kingdom
25. Victoria White, Centre for Behavioral Research in Cancer, Cancer Council Victoria, Victoria, Australia; School of Psychology Deakin University, Geelong, Victoria, 3217, Australia
26. David Weller\*, Centre for Population Health Sciences, University of Edinburgh, Edinburgh, United Kingdom

On behalf of the ICBP Module 4 Working Group

\* equal contribution

1  
2  
3 Corresponding author:

4 Professor Usha Menon

5 MRC CTU at UCL

6 Institute of Clinical Trials and Methodology

7 90 High Holborn, 2nd Floor, London WC1V 6LJ

8 Email: u.menon@ucl.ac.uk

9  
10  
11  
12  
13  
14  
15  
16 Word count: 3074; Tables: 6 ; Figures: 2 ; Appendix A-D

17  
18  
19  
20  
21  
22  
23  
24  
25  
26  
27  
28  
29  
30  
31  
32  
33  
34  
35  
36  
37  
38  
39  
40  
41  
42  
43  
44  
45  
46  
47  
48  
49  
50  
51  
52  
53  
54  
55  
56  
57  
58  
59  
60

For peer review only

## Abstract

### Objective

Differences in time intervals to diagnosis and treatment between jurisdictions may contribute to previously reported differences in stage at diagnosis and survival. The International Cancer Benchmarking Partnership Module 4 (ICBP M4) reports the first international comparison of routes to diagnosis and time intervals from symptom onset until treatment start for lung cancer patients.

### Design

Newly diagnosed lung cancer patients, their primary care physicians (PCP) and cancer treatment specialists (CTS) were surveyed in Victoria (Australia), Manitoba and Ontario (Canada), Northern Ireland, England, Scotland and Wales (UK), Denmark, Norway and Sweden. Using Wales as the reference jurisdiction, the 50<sup>th</sup>, 75<sup>th</sup> and 90<sup>th</sup> percentiles for intervals were compared using quantile regression adjusted for age, gender and comorbidity.

### Participants

Consecutive newly diagnosed lung cancer patients, aged >40 years, diagnosed between October 2012 and March 2015 were identified through cancer registries. Of 10,203 eligible symptomatic patients contacted, 2,631 (27.5%) responded and 2,143 (21.0%) were included in the analysis. Data was also available from 1,211 (56.6%) of their PCPs and 643 (37.0%) of their CTS.

### Primary and secondary outcome measures:

Interval lengths (days, primary), routes to diagnosis, symptoms (secondary).

### Results

With the exception of Denmark (-49 days), in all other jurisdictions the median adjusted total interval from symptom onset to treatment, for respondents diagnosed in 2012-15, was similar to that of Wales (116 days). Denmark had shorter median adjusted primary care interval (-11 days) than Wales (20 days); Sweden had shorter (-20) and Manitoba longer (+40) median adjusted diagnostic intervals compared to Wales (45 days). Denmark (-13), Manitoba (-11), England (-9) and Northern Ireland (-4) had shorter median adjusted treatment intervals than Wales (43 days). The differences were greater for the 10% of patients who waited the longest. Based on overall trends, jurisdictions could be grouped into those with trends of reduced,

1  
2  
3 longer and similar intervals to Wales. The proportion of patients diagnosed following  
4 presentation to the PCP ranged from 35-75%.  
5  
6  
7

### 8 **Conclusion**

9 There are differences between jurisdictions in interval to treatment, which are magnified in  
10 lung cancer patients who wait the longest. The data could help jurisdictions develop more  
11 focused lung cancer policy and targeted clinical initiatives. Future analysis will explore if these  
12 differences in intervals impact on stage or survival.  
13  
14  
15  
16

### 17 **Key words:**

18 lung cancer, routes to diagnosis, time intervals, international health systems, symptomatic  
19 presentation  
20  
21  
22  
23  
24  
25  
26  
27  
28  
29  
30  
31  
32  
33  
34  
35  
36  
37  
38  
39  
40  
41  
42  
43  
44  
45  
46  
47  
48  
49  
50  
51  
52  
53  
54  
55  
56  
57  
58  
59  
60

### Strengths and limitations of this study

- This is the first study to use standardized survey methods and definitions to systematically examine key intervals from patients first noticing symptoms or bodily changes until the start of treatment for lung cancer across multiple jurisdictions
- Recall bias was minimised by the triangulation of different data sources and by patients completing the questionnaire within a limited time window (median 5 months) after the cancer diagnosis
- A key limitation, as with all questionnaire-based studies was selection and non-response bias which varied across jurisdictions
- Recruitment of patients up to 9 rather than 6 months after diagnosis might have magnified selection bias due to high mortality in lung cancer but a sensitivity analysis suggests that this did not impact on the results.
- The comparisons for Norway and Victoria, are limited by small sample size and inclusion of only surgical patients, respectively.

## Introduction

Lung cancer is the most common cancer worldwide, with nearly 1.83 million cases diagnosed in 2012, and is the leading cause of cancer death globally, accounting for 19% of cancer deaths.[1] Survival is typically low, with 5-year survival in Europe, North America and Australia <20%. [2-3] A key factor is diagnosis at advanced stage. Reasons for this are multi-faceted and include delays due to the atypical nature of some presenting symptoms, poor sensitivity of chest X-rays and physicians not acting quickly enough.[4] Within European countries, differences of 12 and 5 percentage points in 1- and 5-year relative survival, respectively, have been reported for lung cancers diagnosed between 1999-2007.[5] This and other international comparisons raises the possibility of additional contributory factors such as variations in referral patterns, access to diagnostic tests and delays in treatment.[6]

One way of addressing this is to chart the patient journey from first noticing symptoms to treatment start. Many national studies using different methodologies have reported on time intervals to treatment of lung cancer and there are reviews that have looked at international timeframe comparisons [7-10] [11-24] However, as far as we are aware there is no study that has undertaken international comparisons of timeliness across multiple countries using the same methodology.

The International Cancer Benchmarking Partnership (ICBP) was established to explore differences in cancer outcomes and their causes in countries with comparable wealth and universal access to healthcare.[25] We report results from Module 4 (ICBP M4) on differences in time intervals and routes to diagnosis in symptomatic lung cancer patients from ten jurisdictions in Australia, Canada, Denmark, Norway, Sweden and the United Kingdom.

## Methods

Methods have been previously detailed.[26] In brief, in each of the ten participating jurisdictions (Victoria (Australia), Manitoba, Ontario (Canada), Denmark, Norway, Sweden Northern Ireland, England, Scotland and Wales), consecutive patients aged  $\geq 40$  years, newly diagnosed with malignant lung or bronchus cancer (ICD-10:C34.0-C34.9; ICD-O-3 behaviour code /3) were identified by the cancer registry using validated methods (hospital episode, cancer registration, pathology). Exclusion criteria included previous lung or synchronous cancers. Patients with a previous non-lung primary cancer were eligible. Target recruitment was 200 symptomatic patients per jurisdiction.

Following a vital status check, cancer registries posted the patient questionnaire (Appendix A1) either 1) to the relevant primary care physician (PCP) who then forwarded the pre-

1  
2  
3 addressed envelope to the patient after confirmation that the person was aware of the  
4 diagnosis and not deemed too sick/anxious to participate in the survey. (Wales, England,  
5 Scotland) or 2) to the patient directly or via the research team (remaining seven jurisdictions).  
6  
7 In an attempt to decrease attrition and recall bias, the protocol initially specified that all patient  
8 questionnaires should be completed within 6 months of diagnosis. As there were  
9 administrative delays in cancer notification, this was extended to 9 months.  
10  
11  
12  
13

14 On receipt of a completed patient questionnaire, in all jurisdictions except Sweden, the  
15 relevant PCP and cancer treatment specialist (CTS) were sent questionnaires (Appendix A.2  
16 and A.3). Specialists provided information on diagnosis and start date of treatment. The latter  
17 was collected directly from registry records in Northern Ireland and clinical databases in  
18 Denmark. Manitoba did not provide specialist data. Date of diagnosis and stage was also  
19 collected where possible through cancer registries. Information on the types of treatment  
20 (surgery, chemotherapy, radiotherapy and other) were obtained from the patient survey.  
21  
22  
23  
24  
25  
26

### 27 *Data handling*

28 Data were recoded centrally to ensure that the same explicit rules were applied throughout.  
29 Patients in whom age, date of diagnosis or consent were missing were excluded from  
30 analyses. Rules were used to combine data from the different sources in a standardised way  
31 that ensured reproducibility and transparency (Appendix B). The rules employed a 'hierarchy'  
32 principle in terms of the order in which different data sources were used and included  
33 imputation rules based on the available data. The exact rule was guided by the measure in  
34 question – for example, patient interval was collected primarily from the patient questionnaire  
35 whereas primary care time-points from the PCP questionnaire. We applied rules for outliers  
36 and implausible measures (e.g. negative time intervals were recorded to zero-days and  
37 intervals longer than a year to 365 days).  
38  
39  
40  
41  
42  
43  
44  
45

### 46 *Routes to diagnosis and symptoms prompting physician visit*

47 These were derived from patient and PCP responses. Symptoms were coded by two PCP  
48 authors (DW and PV) into 'lung cancer specific' or 'other' (Appendix C1).  
49  
50  
51

### 52 *Time intervals*

53 Time intervals were derived using the checklist for the Aarhus Statement.[27] The following  
54 time-points were used to calculate the corresponding time intervals (Figure 1):  
55  
56

- 57 • first noticing symptoms
- 58 • first presentation to health care
- 59 • first referral to secondary care
- 60

- diagnosis date
- start of curative or palliative treatment

---

FIGURE 1

---

All time-points were validated if there were obvious inconsistencies and negative intervals were set to 0 days. All intervals were truncated at 365 days. Missing data were imputed based on specific rules to ensure that the direction of a possible misclassification bias was known.

### *Demographics*

Health status was measured using the self-reported general health item from short form 36 health survey (SF36).[28] Comorbidity was defined as one of four patient or PCP-reported diseases (heart or lung disease, stroke or diabetes) and categorised into: 'none', 'medium' (one or two) or 'high' (three or four). Level of educational was categorised as 'low' (vocational school or lower) and 'high' (university). Stage data (tumour, node, metastasis - TNM - classification) was grouped as I, II, III, IV or missing.[29]

### *Statistical analysis*

Patient characteristics across jurisdictions were compared using Kruskal-Wallis test for continuous and ordinal data. For nominal data we used Pearson's chi-squared test and Fisher's exact test (if more than 20% of expected cell counts were less than 5 or at least one expected cell count was 0). The differences in intervals between the jurisdictions were estimated using quantile regression, as this method allows for a comparison across the whole distribution of length of the interval.[30] As we were interested in a measure of central tendency of length of the interval and in long and very long intervals, the focus of the study was on the 50<sup>th</sup>(median), 75<sup>th</sup> and 90<sup>th</sup> interval percentiles. Wales was chosen as the reference jurisdiction as it had the lowest lung cancer survival in ICBP Module 1 analysis.[10] Since the length of the interval in days is a continuous measure which has been rounded, we applied the quantile regression analysis on the smoothed quantiles; the method based on the smoothed quantiles is recommended for analyses of discrete (count) data [31]. In STATA this method is implemented in the 'qcount' procedure.[32] Parameters were calculated with 1000 jittered samples. For all interval analyses, the differences in intervals were calculated as marginal effects after quantile regression by setting the continuous covariate (age) to their mean values and the categorical covariates (sex and comorbidity) to their modes. Significance level was set to  $\leq 0.05$  with 95% confidence intervals (95%CI) calculated where appropriate. Statistical analyses were carried out using STATA v14.

### *Sensitivity and validity analyses*

All analyses were repeated using only (1) those who fulfilled the 6-month cut-off criteria for interval from diagnosis to questionnaire completion and (2) patient data. The effect of excluding patients for whom at least one interval was missing was investigated. We also repeated the analysis after omitting time intervals which were negative or over 365 days. Agreement between the different data sources (registry, patient, PCP (except in Sweden) and CTS (except in Sweden and Manitoba) was measured by Lin's concordance correlation coefficient (CCC).[33]

### *Patient involvement*

The research questions for this survey drew on an extensive literature relating to diagnosis and treatment delays leading to negative patient experiences. While patient experience was not a primary outcome measure for this study, patients were given the opportunity to comment on their experience through questionnaire free-text response options (under separate analysis). Patients were involved in the piloting of study instruments to ascertain if recruitment and questionnaire content and dissemination strategies were appropriate, described elsewhere.[26] Each jurisdiction has committed to communicating the findings and local implications of this study to organisations representing their study participants.

### **Results**

Of 14,583 lung cancer patients, diagnosed between October 2012 and March 2015 who were alive when identified, 70% (10,203/14,583) were contacted (Table 1). Of 4380 not contacted, 3367 (77%) were from England, Wales and Scotland. Major reasons reported by the PCP for not forwarding the survey included patients being terminally ill, not aware of cancer diagnosis at the time of request, having cognitive or visual impairment, language / communication difficulties, no longer at the address, not wishing to take part in research and a handful not having the index cancer. In addition patients identified were not contacted in England as the target recruitment had been exceeded. For the non-UK jurisdictions, the main reasons for not contacting patients were the patient having died or no longer at the address.

2,631 (27.5% of contacted, 18% of eligible) completed the patient questionnaire at a median of 5 months (range: 0.1,9) after diagnosis (Table 2). The response rate of contacted patients varied from 11.1% (146/1318) in Norway to 61.8% (333/539) in Denmark. Responding patients were more likely to be aged 60-79 years with less advanced stage (Table 1) and alive one year post diagnosis (data not shown). Of the 2,631 responses, 2,143 (81.5%) were included in the analyses which equates to 14.7% (2,143/14,583) of eligible patients. The key reason respondents were excluded were local oversampling (43.9%; 214/488) for additional analyses

1  
2  
3 (Table 1). In Victoria, the registry was only able to contact patients who had undergone surgery  
4 while the sample size in Norway was limited (n=88) due to delays in securing appropriate  
5 approvals.  
6  
7  
8  
9  
10  
11  
12  
13  
14  
15  
16  
17  
18  
19  
20  
21  
22  
23  
24  
25  
26  
27  
28  
29  
30  
31  
32  
33  
34  
35  
36  
37  
38  
39  
40  
41  
42  
43  
44  
45  
46  
47  
48  
49  
50  
51  
52  
53  
54  
55  
56  
57  
58  
59  
60

For peer review only

Table 1: Cohort for all ten jurisdictions and overall

| Jurisdiction                                                               | Patients approached via PCP |               |              |               |              |               | Patient approached directly by registries/research teams |                        |               |                        |            |               |                        |               |                        |               | Total         |               |                           |               |                           |                           |
|----------------------------------------------------------------------------|-----------------------------|---------------|--------------|---------------|--------------|---------------|----------------------------------------------------------|------------------------|---------------|------------------------|------------|---------------|------------------------|---------------|------------------------|---------------|---------------|---------------|---------------------------|---------------|---------------------------|---------------------------|
|                                                                            | Wales                       |               | England      |               | Scotland     |               | N Ireland                                                |                        | Denmark       |                        | Manitoba   |               | Ontario                |               | Sweden                 |               |               |               | Norway                    |               | Victoria                  |                           |
|                                                                            | n                           | (%)           | n            | (%)           | n            | (%)           | n                                                        | (%)                    | n             | (%)                    | n          | (%)           | n                      | (%)           | n                      | (%)           | n             | (%)           | n                         | (%)           | n                         | (%)                       |
| <b>Eligible patients <sup>a, b</sup></b>                                   | <b>1,811</b>                | <b>(100)</b>  | <b>2,517</b> | <b>(100)</b>  | <b>1,366</b> | <b>(100)</b>  | <b>620</b>                                               | <b>(100)</b>           | <b>539</b>    | <b>(100)</b>           | <b>980</b> | <b>(100)</b>  | <b>4,080</b>           | <b>(100)</b>  | <b>493</b>             | <b>(100)</b>  | <b>1,318</b>  | <b>(100)</b>  | <b>859</b>                | <b>(100)</b>  | <b>14,583</b>             | <b>(100)</b>              |
| <b>Packs sent to PCP <sup>c, d</sup></b>                                   | <b>1,811</b>                | <b>(99.7)</b> | <b>1,759</b> | <b>(69.9)</b> | <b>1,137</b> | <b>(83.2)</b> |                                                          |                        |               |                        |            |               |                        |               |                        |               |               |               |                           |               | <b>4,707</b>              | <b>(82.7)</b>             |
| pack not forwarded by PCP                                                  | 547                         | (30.1)        | 255          | (14.5)        | 201          | (17.7)        |                                                          |                        |               |                        |            |               |                        |               |                        |               |               |               |                           |               | 1,003                     | (21.3)                    |
| unsure if pack forwarded by PCP                                            | 531                         | (29.2)        | 559          | (31.8)        | 234          | (20.6)        |                                                          |                        |               |                        |            |               |                        |               |                        |               |               |               |                           |               | 1,324                     | (28.1)                    |
| <b>Patients contacted by PCP <sup>c, d</sup></b>                           | <b>733</b>                  | <b>(40.4)</b> | <b>945</b>   | <b>(53.7)</b> | <b>702</b>   | <b>(61.7)</b> |                                                          |                        |               |                        |            |               |                        |               |                        |               |               |               |                           |               | <b>2,380</b>              | <b>(50.6)</b>             |
| <b>Patients approached directly <sup>e</sup></b>                           |                             |               |              |               |              |               | <b>614</b>                                               | <b>(99.0)</b>          | <b>539</b>    | <b>(100)</b>           | <b>745</b> | <b>(76.0)</b> | <b>3,687</b>           | <b>(90.4)</b> | <b>493</b>             | <b>(100)</b>  | <b>1,200</b>  | <b>(91)</b>   | <b>545</b>                | <b>(63.4)</b> | <b>7,823</b>              | <b>(88)</b>               |
| patient died                                                               |                             |               |              |               |              |               | 6                                                        | (1.0)                  | 0             | (0.0)                  | 103        | (13.8)        | 249                    | (6.8)         | 0                      | (0.0)         | 0             | (0.0)         | 0                         | (0.0)         | 358                       | (4.6)                     |
| no address                                                                 |                             |               |              |               |              |               | 0                                                        | (0.0)                  | 0             | (0.0)                  | 9          | (1.2)         | 255                    | (6.9)         | 0                      | (0.0)         | 0             | (0.0)         | 0                         | (0.0)         | 264                       | (3.4)                     |
| Other                                                                      |                             |               |              |               |              |               | 0                                                        | (0.0)                  | 0             | (0.0)                  | 6          | (0.8)         | 215                    | (5.8)         | 0                      | (0.0)         | 0             | (0.0)         | 0                         | (0.0)         | 221                       | (2.8)                     |
| <b>Patient responses (% of eligible patients) <sup>e</sup></b>             | <b>223</b>                  | <b>(12.3)</b> | <b>261</b>   | <b>(10.4)</b> | <b>235</b>   | <b>(17.2)</b> | <b>226</b>                                               | <b>(36.5)</b>          | <b>333</b>    | <b>(61.8)</b>          | <b>205</b> | <b>(20.9)</b> | <b>572</b>             | <b>(14.0)</b> | <b>217</b>             | <b>(44)</b>   | <b>146</b>    | <b>(11.1)</b> | <b>213</b>                | <b>(24.8)</b> | <b>2,631</b>              | <b>(18)</b>               |
| <b>Patient responses (% of contacted) <sup>e</sup></b>                     | <b>223</b>                  | <b>(30.4)</b> | <b>261</b>   | <b>(27.6)</b> | <b>235</b>   | <b>(33.5)</b> | <b>226</b>                                               | <b>(37.2)</b>          | <b>333</b>    | <b>(61.8)</b>          | <b>205</b> | <b>(32.7)</b> | <b>572</b>             | <b>(19.3)</b> | <b>217</b>             | <b>(44)</b>   | <b>146</b>    | <b>(12.2)</b> | <b>213</b>                | <b>(39.1)</b> | <b>2,631</b>              | <b>(27.5)</b>             |
| extra sample for local purpose                                             | 0                           | (0.0)         | 0            | (0.0)         | 0            | (0.0)         | 0                                                        | (0.0)                  | 0             | (0.0)                  | 0          | (0.0)         | 214                    | (37.4)        | 0                      | (0.0)         | 0             | (0.0)         | 0                         | (0.0)         | 214                       | (8.1)                     |
| other                                                                      | 0                           | (0.0)         | 0            | (0.0)         | 35           | (14.9)        | 25                                                       | (11.1)                 | 38            | (11.4)                 | 0          | (0.0)         | 43                     | (7.5)         | 0                      | (0.0)         | 0             | (0.0)         | 3                         | (1.4)         | 144                       | (5.5)                     |
| <b>Patient surveys submitted for analyses <sup>f</sup></b>                 | <b>223</b>                  | <b>(100)</b>  | <b>261</b>   | <b>(100)</b>  | <b>200</b>   | <b>(85.1)</b> | <b>201</b>                                               | <b>(88.9)</b>          | <b>295</b>    | <b>(88.6)</b>          | <b>205</b> | <b>(100)</b>  | <b>315</b>             | <b>(55.1)</b> | <b>217</b>             | <b>(100)</b>  | <b>146</b>    | <b>(100)</b>  | <b>210</b>                | <b>(98.6)</b> | <b>2,273</b>              | <b>(86.4)</b>             |
| excluded for analyses – total                                              | 12                          | (5.4)         | 9            | (3.4)         | 2            | (1.0)         | 1                                                        | (0.5)                  | 10            | (3.4)                  | 3          | (1.5)         | 27                     | (8.6)         | 6                      | (2.8)         | 58            | (39.7)        | 2                         | (1.0)         | 130                       | (5.7)                     |
| - previous cancer                                                          | 0                           | (0.0)         | 5            | (1.9)         | 0            | (0.0)         | 0                                                        | (0.0)                  | 0             | (0.0)                  | 0          | (0.0)         | 3                      | (1.0)         | 0                      | (0.0)         | 0             | (0.0)         | 0                         | (0.0)         | 8                         | (0.4)                     |
| - unknown date of consent or diagnosis                                     | 0                           | (0.0)         | 0            | (0.0)         | 0            | (0.0)         | 0                                                        | (0.0)                  | 5             | (1.7)                  | 0          | (0.0)         | 1                      | (0.3)         | 6                      | (2.8)         | 4             | (2.7)         | 0                         | (0.0)         | 16                        | (0.7)                     |
| - consent too late/too early                                               | 12                          | (5.4)         | 4            | (1.5)         | 2            | (1.0)         | 1                                                        | (0.5)                  | 5             | (1.7)                  | 3          | (1.5)         | 22                     | (7.0)         | 0                      | (0.0)         | 33            | (22.6)        | 2                         | (1.0)         | 84                        | (3.7)                     |
| - other                                                                    | 0                           | (0.0)         | 0            | (0.0)         | 0            | (0.0)         | 0                                                        | (0.0)                  | 0             | (0.0)                  | 0          | (0.0)         | 1                      | (0.3)         | 0                      | (0.0)         | 21            | (14.4)        | 0                         | (0.0)         | 22                        | (1.0)                     |
| <b>Patients included in analyses <sup>i</sup> (% of forwarded surveys)</b> | <b>211</b>                  | <b>(94.6)</b> | <b>252</b>   | <b>(96.6)</b> | <b>198</b>   | <b>(99.0)</b> | <b>200</b>                                               | <b>(99.5)</b>          | <b>285</b>    | <b>(96.6)</b>          | <b>202</b> | <b>(98.5)</b> | <b>288</b>             | <b>(91.4)</b> | <b>211</b>             | <b>(97.2)</b> | <b>88</b>     | <b>(60.3)</b> | <b>208</b>                | <b>(99.0)</b> | <b>2,143</b>              | <b>(94.3)<sup>h</sup></b> |
| <b>PCP surveys <sup>j</sup> (% of analysed patients)</b>                   | <b>133</b>                  | <b>(63.0)</b> | <b>196</b>   | <b>(77.8)</b> | <b>149</b>   | <b>(75.3)</b> | <b>181</b>                                               | <b>(90.5)</b>          | <b>218</b>    | <b>(76.5)</b>          | <b>109</b> | <b>(54.0)</b> | <b>93</b>              | <b>(32.5)</b> | <b>n/a<sup>h</sup></b> | <b>27</b>     | <b>(30.7)</b> | <b>105</b>    | <b>(50.5)</b>             | <b>1,211</b>  | <b>(56.6)<sup>i</sup></b> |                           |
| <b>Specialist surveys <sup>k</sup> (% of analysed patients)</b>            | <b>98</b>                   | <b>(46.4)</b> | <b>153</b>   | <b>(60.7)</b> | <b>106</b>   | <b>(53.5)</b> | <b>n/a<sup>g</sup></b>                                   | <b>149<sup>g</sup></b> | <b>(52.3)</b> | <b>n/a<sup>h</sup></b> | <b>62</b>  | <b>(21.7)</b> | <b>n/a<sup>h</sup></b> | <b>20</b>     | <b>(22.7)</b>          | <b>55</b>     | <b>(26.4)</b> | <b>643</b>    | <b>(37.0)<sup>m</sup></b> |               |                           |                           |

<sup>a</sup>Eligible as per protocol: individual aged 40 years or more, with cancer of the lung or bronchus (ICD-10 code: C34.0-C34.9; behaviour code ICD-O 3) but no synchronous primary cancer or prior history of lung cancer, alive at identification who completed consent to participate within nine months of diagnosis. <sup>b</sup>In some jurisdictions some 'eligible' patients had pre-opted out from being contacted and a small number where PCP information was not available. <sup>c</sup>Percentages of eligible patients. <sup>d</sup>Maximum of potentially contacted patients. i.e. sum of packs forwarded by PCP and packs unsure if forwarded by PCP. <sup>e</sup>Percentages of patients contacted by PCP (see note d) for Wales, England and Scotland or percentages of patients contacted directly by a registry; excl. non-accessible patients due to death or no patient addresses (all other jurisdictions). <sup>f</sup>Percentages of patient responses. <sup>g</sup>Data obtained from registries instead in N Ireland and Denmark. <sup>h</sup>Data not collected in this jurisdiction. <sup>i</sup>Denominator = total number of forwarded cases excl. patients not included in analytic sample in Ontario. <sup>j</sup>Denominator r = total number of analysed cases excl. patients from Sweden. <sup>k</sup>Denominator = total number of analysed cases excl. patients from Sweden. Manitoba & N Ireland

### *Baseline characteristics*

Patient characteristics are detailed in Table 2. The cohort was predominantly White (95%), median age 70 years (IQR 64,75) with 82% reporting 'low' levels of education. Norway provided stage data classified as local, regional and distant which could not be converted to TNM stage data.

Ontario was the only jurisdiction with more female (65%) than male respondents. While self-reported health differed significantly, with Welsh patients (9%) reporting twice as high 'poor health' rates than English or Swedish (4%) and eight-fold that of Manitoba (2%), there was no difference in self-reported comorbidity rates. Even after the exclusion of Victoria, there was significant variation in early Stage (I/II) disease which ranged from 25% (Wales) to 59% (Ontario) and surgical resection rates which varied from 27% (Wales) to 58% (Ontario) (Table 2).

**Table 2.** The characteristics of eligible patients by jurisdictions and overall

|                                                                                              | Wales<br>(N=211) | England<br>(N=252) | Scotland<br>(N=198) | N Ireland<br>(N=200) | Denmark<br>(N=285) | Manitoba<br>(N=202) | Ontario<br>(N=288) | Sweden<br>(N=211) | Norway<br>(N=88) | Victoria<br>(N=208) | Overall<br>(N=2143) | p-value <sup>6</sup>                          |
|----------------------------------------------------------------------------------------------|------------------|--------------------|---------------------|----------------------|--------------------|---------------------|--------------------|-------------------|------------------|---------------------|---------------------|-----------------------------------------------|
| Date of diagnosis of first patient                                                           | 03/04/2013       | 28/01/2013         | 26/04/2013          | 22/01/2013           | 16/05/2013         | 10/10/2012          | 08/10/2013         | 01/10/2013        | 16/01/2014       | 08/01/2013          | 10/10/2012          |                                               |
| Date of diagnosis of last patient                                                            | 25/09/2014       | 14/08/2013         | 04/12/2013          | 02/12/2014           | 13/11/2013         | 27/03/2015          | 01/10/2014         | 30/05/2014        | 21/01/2015       | 28/12/2014          | 27/03/2015          |                                               |
| Interval from diagnosis date of first patient to last patient in months (recruitment period) | 18               | 7                  | 7                   | 23                   | 6                  | 30                  | 12                 | 8                 | 12               | 24                  | 30                  |                                               |
| Median (range) interval diagnosis to questionnaire completion in months                      | 5 (0.6,9)        | 5 (3,9)            | 5 (1,9)             | 4 (0.1,9)            | 5 (2,8)            | 6 (4,9)             | 6 (4,9)            | 4 (3,8)           | 7 (5,9)          | 5 (0.2,8)           | 5 (0.1,9)           |                                               |
| <b>Age</b> years                                                                             |                  |                    |                     |                      |                    |                     |                    |                   |                  |                     |                     |                                               |
| Median (IQR)                                                                                 | 71 (65, 77)      | 71 (65, 77)        | 70 (64, 76)         | 69 (62, 75)          | 70 (63, 74)        | 70 (63, 77)         | 70 (64, 75)        | 70 (63, 75)       | 69 (64, 73)      | 68 (63, 73)         | 70 (64, 75)         | 0.010 <sup>1</sup>                            |
| <b>Sex</b> n(%)                                                                              |                  |                    |                     |                      |                    |                     |                    |                   |                  |                     |                     |                                               |
| Male                                                                                         | 127(60)          | 134(53)            | 100(51)             | 105(53)              | 151(53)            | 100(50)             | 131(45)            | 111(53)           | 46(52)           | 112(54)             | 1117(52)            | 0.159 <sup>2</sup>                            |
| <b>Health State</b> n(%)                                                                     |                  |                    |                     |                      |                    |                     |                    |                   |                  |                     |                     |                                               |
| Good                                                                                         | 135(64)          | 176(70)            | 131(66)             | 126(63)              | 190(67)            | 156(77)             | 220(76)            | 152(72)           | 50(57)           | 163(78)             | 1499(70)            | <0.001* <sup>1</sup><br><0.001** <sup>2</sup> |
| Fair                                                                                         | 55(26)           | 59(23)             | 52(26)              | 51(26)               | 62(22)             | 41(20)              | 47(16)             | 49(23)            | 32(36)           | 33(16)              | 481(22)             |                                               |
| Poor                                                                                         | 20(9)            | 11(4)              | 14(7)               | 16(8)                | 18(6)              | 4(2)                | 16(6)              | 9(4)              | 6(7)             | 10(5)               | 124(6)              |                                               |
| Missing                                                                                      | 1(0.5)           | 6(2)               | 1(0.5)              | 7(4)                 | 15(5)              | 1(0.5)              | 5(2)               | 1(0.5)            | 0(0)             | 2(1)                | 39(2)               |                                               |
| <b>Comorbidity</b> <sup>3</sup> n(%)                                                         |                  |                    |                     |                      |                    |                     |                    |                   |                  |                     |                     |                                               |
| No                                                                                           | 92(44)           | 113(45)            | 98(49)              | 82(41)               | 111(39)            | 101(50)             | 136(47)            | 114(54)           | 35(40)           | 98(47)              | 980(46)             | 0.029* <sup>1</sup><br>0.032** <sup>2</sup>   |
| Medium                                                                                       | 111(53)          | 129(51)            | 92(46)              | 103(52)              | 157(55)            | 93(46)              | 132(46)            | 87(41)            | 48(55)           | 100(48)             | 1052(49)            |                                               |
| High                                                                                         | 7(3)             | 9(4)               | 8(4)                | 15(8)                | 11(4)              | 6(3)                | 18(6)              | 6(3)              | 5(6)             | 8(4)                | 93(4)               |                                               |
| Missing                                                                                      | 1(0.5)           | 1(0.4)             | 0(0)                | 0(0)                 | 6(2)               | 2(1)                | 2(0.7)             | 4(2)              | 0(0)             | 2(1)                | 18(0.8)             |                                               |
| <b>Education</b> n(%)                                                                        |                  |                    |                     |                      |                    |                     |                    |                   |                  |                     |                     |                                               |
| Low                                                                                          | 172(82)          | 217(86)            | 174(88)             | 166(83)              | 232(81)            | 170(84)             | 224(78)            | 159(75)           | 65(74)           | 181(87)             | 1760(82)            | <0.001* <sup>1</sup><br><0.001** <sup>2</sup> |
| High                                                                                         | 11(5)            | 15(6)              | 11(6)               | 17(9)                | 15(5)              | 21(10)              | 55(19)             | 48(23)            | 14(16)           | 24(12)              | 231(11)             |                                               |

|                                            | Wales<br>(N=211) | England<br>(N=252) | Scotland<br>(N=198) | N Ireland<br>(N=200) | Denmark<br>(N=285) | Manitoba<br>(N=202) | Ontario<br>(N=288) | Sweden<br>(N=211) | Norway<br>(N=88)    | Victoria<br>(N=208) | Overall<br>(N=2143) | p-value <sup>6</sup>                              |
|--------------------------------------------|------------------|--------------------|---------------------|----------------------|--------------------|---------------------|--------------------|-------------------|---------------------|---------------------|---------------------|---------------------------------------------------|
| Missing                                    | 28(13)           | 20(8)              | 13(7)               | 17(9)                | 38(13)             | 11(5)               | 9(3)               | 4(2)              | 9(10)               | 3(1)                | 152(7)              |                                                   |
| <b>Ethnicity n(%)</b>                      | 205(97)          | 249(99)            | 197(99)             | 196(98)              | 267(94)            | 173(86)             | 261(91)            | n/a               | 87(99)              | 199(96)             | 1834(95)            | <0.001* <sup>2</sup>                              |
| White                                      |                  |                    |                     |                      |                    |                     |                    |                   |                     |                     |                     | <0.001** <sup>2</sup>                             |
| Asian                                      | 1(0.5)           | 0(0)               | 1(0.5)              | 0(0)                 | 0(0)               | 12(6)               | 21(7)              | n/a               | 1(1)                | 6(3)                | 41(2)               |                                                   |
| Black                                      | 0(0)             | 1(0.4)             | 0(0)                | 0(0)                 | 1(0.4)             | 0(0)                | 1(0.3)             | n/a               | 0(0)                | 0(0)                | 3(0.2)              |                                                   |
| Other                                      | 0(0)             | 0(0)               | 0(0)                | 0(0)                 | 0(0)               | 15(7)               | 2(0.7)             | n/a               | 0(0)                | 0(0)                | 17(0.9)             |                                                   |
| Missing                                    | 5(2)             | 2(0.8)             | 0(0)                | 4(2)                 | 17(6)              | 2(1)                | 3(1)               | n/a               | 0(0)                | 3(1)                | 36(2)               |                                                   |
| <b>Smoking n(%)</b>                        | 13(6)            | 18(7)              | 12(6)               | 19(10)               | 15(5)              | 22(11)              | 31(11)             | 41(19)            | 11(13)              | 33(16)              | 215(10)             | <0.001* <sup>2</sup>                              |
| Never                                      |                  |                    |                     |                      |                    |                     |                    |                   |                     |                     |                     | <0.001** <sup>2</sup>                             |
| Currently                                  | 19(9)            | 28(11)             | 26(13)              | 41(21)               | 58(20)             | 24(12)              | 29(10)             | 29(14)            | 11(13)              | 9(4)                | 274(13)             |                                                   |
| In the past                                | 174(82)          | 204(81)            | 160(81)             | 137(69)              | 205(72)            | 156(77)             | 225(78)            | 139(66)           | 66(75)              | 165(79)             | 1631(76)            |                                                   |
| Missing                                    | 5(2)             | 2(0.8)             | 0(0)                | 3(2)                 | 7(2)               | 0(0)                | 3(1)               | 2(0.9)            | 0(0)                | 1(0.5)              | 23(1)               |                                                   |
| <b>Tumour stage – TNM n(%)</b>             | 26(12)           | 68(27)             | 49(25)              | 42(21)               | 74(26)             | 83(41)              | 133(46)            | 59(28)            | 3(3)                | 124(60)             | 661(31)             | <0.001* <sup>1</sup><br><0.001** <sup>2</sup>     |
| I                                          |                  |                    |                     |                      |                    |                     |                    |                   |                     |                     |                     |                                                   |
| II                                         | 27(13)           | 36(14)             | 32(16)              | 33(17)               | 26(9)              | 19(9)               | 38(13)             | 11(5)             | 5(6)                | 47(23)              | 274(13)             |                                                   |
| III                                        | 64(30)           | 57(23)             | 56(28)              | 59(30)               | 84(29)             | 48(24)              | 54(19)             | 40(19)            | 5(6)                | 19(9)               | 486(23)             |                                                   |
| IV                                         | 62(29)           | 80(32)             | 50(25)              | 62(31)               | 94(33)             | 48(24)              | 54(19)             | 94(45)            | 3(3)                | 13(6)               | 560(26)             |                                                   |
| Missing                                    | 32(15)           | 11(4)              | 11(6)               | 4(2)                 | 7(2)               | 4(2)                | 9(3)               | 7(3)              | 72(82) <sup>4</sup> | 5(2)                | 162(8)              |                                                   |
| <b>Tumour stage – TNM<sup>5</sup> n(%)</b> | 53(25)           | 104(41)            | 81(41)              | 75(38)               | 100(35)            | 102(51)             | 171(59)            | 70(33)            | 8(9)                | 171(82)             | 764(39)             | <0.001* <sup>2,5</sup><br><0.001** <sup>2,5</sup> |
| I/II                                       |                  |                    |                     |                      |                    |                     |                    |                   |                     |                     |                     |                                                   |
| III/IV                                     | 126(60)          | 137(54)            | 106(54)             | 121(61)              | 178(62)            | 96(48)              | 108(38)            | 134(64)           | 8(9)                | 32(15)              | 1014(52)            |                                                   |
| Missing                                    | 32(15)           | 11(4)              | 11(6)               | 4(2)                 | 7(2)               | 4(2)                | 9(3)               | 7(3)              | 72(82)              | 5(2)                | 157(8)              |                                                   |
| <b>Treatment Surgery n(%)</b>              | 57(27)           | 107(42)            | 84(42)              | 65(33)               | 81(28)             | 113(56)             | 168(58)            | 65(31)            | 36(41)              | 199(96)             | 975(45)             | <0.001* <sup>2,5</sup><br><0.001** <sup>2,5</sup> |
| Yes                                        |                  |                    |                     |                      |                    |                     |                    |                   |                     |                     |                     |                                                   |
| No                                         | 61(29)           | 56(22)             | 55(28)              | 94(47)               | 90(32)             | 44(22)              | 111(39)            | 79(37)            | 28(32)              | 5(2)                | 623(29)             |                                                   |
| Missing                                    | 93(44)           | 89(35)             | 59(30)              | 41(21)               | 114(40)            | 45(22)              | 9(3)               | 67(32)            | 24(27)              | 4(2)                | 545(25)             |                                                   |
| <b>Treatment Chemo n(%)</b>                | 105(50)          | 125(50)            | 98(49)              | 93(47)               | 159(56)            | 93(46)              | 107(37)            | 133(63)           | 50(57)              | 63(30)              | 1026(48)            | <0.001* <sup>2,5</sup><br><0.001** <sup>2,5</sup> |
| Yes                                        |                  |                    |                     |                      |                    |                     |                    |                   |                     |                     |                     |                                                   |
| No                                         | 41(19)           | 51(20)             | 46(23)              | 65(33)               | 45(16)             | 62(31)              | 172(60)            | 37(18)            | 18(20)              | 137(66)             | 674(32)             |                                                   |
| Missing                                    | 65(31)           | 76(30)             | 54(27)              | 42(21)               | 81(28)             | 47(23)              | 9(3)               | 41(19)            | 20(23)              | 8(4)                | 443(21)             |                                                   |
| <b>Treatment Radio n(%)</b>                | 82(39)           | 68(27)             | 76(38)              | 72(36)               | 114(40)            | 81(40)              | 98(34)             | 70(33)            | 41(47)              | 29(14)              | 731(34)             | <0.001* <sup>2,5</sup><br><0.001** <sup>2,5</sup> |
| Yes                                        |                  |                    |                     |                      |                    |                     |                    |                   |                     |                     |                     |                                                   |
| No                                         | 50(24)           | 72(29)             | 50(25)              | 77(39)               | 69(24)             | 71(35)              | 180(63)            | 69(33)            | 22(25)              | 155(75)             | 815(38)             |                                                   |
| Missing                                    | 79(37)           | 112(44)            | 72(36)              | 51(26)               | 102(36)            | 50(25)              | 10(3)              | 72(34)            | 25(28)              | 24(12)              | 597(28)             |                                                   |
| <b>Treatment Other n(%)</b>                | 10(5)            | 14(6)              | 14(7)               | 11(6)                | 30(11)             | 18(9)               | 9(3)               | 0(0)              | 7(8)                | 16(8)               | 129(6)              | <0.001* <sup>2,5</sup><br><0.001** <sup>2,5</sup> |
| Yes                                        |                  |                    |                     |                      |                    |                     |                    |                   |                     |                     |                     |                                                   |

1  
2  
3  
4  
5  
6  
7  
8  
9  
10  
11  
12  
13  
14  
15  
16  
17  
18  
19  
20  
21  
22  
23  
24  
25  
26  
27  
28  
29  
30  
31  
32  
33  
34  
35  
36  
37  
38  
39  
40  
41  
42  
43  
44  
45  
46

|         | <b>Wales<br/>(N=211)</b> | <b>England<br/>(N=252)</b> | <b>Scotland<br/>(N=198)</b> | <b>N Ireland<br/>(N=200)</b> | <b>Denmark<br/>(N=285)</b> | <b>Manitoba<br/>(N=202)</b> | <b>Ontario<br/>(N=288)</b> | <b>Sweden<br/>(N=211)</b> | <b>Norway<br/>(N=88)</b> | <b>Victoria<br/>(N=208)</b> | <b>Overall<br/>(N=2143)</b> | <b>p-value<sup>6</sup></b> |
|---------|--------------------------|----------------------------|-----------------------------|------------------------------|----------------------------|-----------------------------|----------------------------|---------------------------|--------------------------|-----------------------------|-----------------------------|----------------------------|
| No      | 48(23)                   | 63(25)                     | 45(23)                      | 69(35)                       | 255(89)                    | 3(1)                        | 261(91)                    | 0(0)                      | 2(2)                     | 138(66)                     | 884(41)                     |                            |
| Missing | 153(72)                  | 175(69)                    | 139(70)                     | 120(60)                      | 0(0)                       | 181(90)                     | 18(6)                      | 211(100)                  | 79(90)                   | 54(26)                      | 1130(53)                    |                            |

<sup>1</sup>Differences between jurisdictions were tested by the Kruskal-Wallis test, <sup>2</sup> Differences between jurisdictions were tested by the Pearson’s Chi<sup>2</sup> test, <sup>3</sup>Comorbidity coded as none=no reported, medium=1-2 reported and high=3+ reported, <sup>4</sup> This included cases which could not be mapped as they were classified as per Cancer Registry of Norway into local (stage I), regional (stage II-III) and distant (stage IV) <sup>5</sup>Excluding Victoria, <sup>6</sup>Excluding Norway, \*Missing category is excluded, \*\*Missing category is included, Abbreviations: IQR=inter-quartile range.

For peer review only

1  
2  
3  
4  
5 *Routes to diagnosis*

6 Results are detailed in Table 3. Over half (55%) were diagnosed following presentation to the  
7 PCP of whom 63% (range: 29% Norway - 82% Wales; data not shown) were urgently referred  
8 with a suspicion of cancer, based on the PCP questionnaire.  
9  
10  
11  
12  
13  
14  
15  
16  
17  
18  
19  
20  
21  
22  
23  
24  
25  
26  
27  
28  
29  
30  
31  
32  
33  
34  
35  
36  
37  
38  
39  
40  
41  
42  
43  
44  
45  
46  
47  
48  
49  
50  
51  
52  
53  
54  
55  
56  
57  
58  
59  
60

For peer review only

**Table 3.** Routes to diagnosis of lung cancer patients for each jurisdiction. All figures are n(%) unless otherwise stated.

|                                                                                            | Wales<br>(N=211) | England<br>(N=252) | Scotland<br>(N=198) | N Ireland<br>(N=200) | Denmark<br>(N=285) | Manitoba<br>(N=202) | Ontario<br>(N=288) | Sweden<br>(N=211) | Norway<br>(N=88) | Victoria<br>(N=208) | Total<br>(N=2143) |
|--------------------------------------------------------------------------------------------|------------------|--------------------|---------------------|----------------------|--------------------|---------------------|--------------------|-------------------|------------------|---------------------|-------------------|
| Symptoms prompting visit to PCP                                                            | 109(52)          | 150(60)            | 128(65)             | 131(66)              | 170(60)            | 101(50)             | 91(32)             | 65(31)            | 35(40)           | 106(51)             | 1086(51)          |
| Symptoms prompting emergency (A&E) department visit <sup>1</sup>                           | 11(5)            | 18(7)              | 12(6)               | 22(11)               | 21(7)              | 25(12)              | 39(14)             | 18(9)             | 3(3)             | 6(3)                | 175(8)            |
| Symptoms prompting visit to PCP and emergency (A&E) department <sup>1</sup>                | 10(5)            | 4(2)               | 7(4)                | 18(9)                | 8(3)               | 15(7)               | 12(4)              | 8(4)              | 5(6)             | 3(1)                | 90(4)             |
| Incidental diagnosis in course of investigation/treatment for another problem <sup>2</sup> | 68(32)           | 37(15)             | 36(18)              | 19(10)               | 55(19)             | 57(28)              | 116(40)            | 107(51)           | 32(36)           | 90(43)              | 617(29)           |
| Unknown routes to diagnosis <sup>3</sup>                                                   | 10(5)            | 17(7)              | 11(6)               | 5(3)                 | 16(6)              | 4(2)                | 14(5)              | 11(5)             | 8(9)             | 0(0)                | 96(5)             |
| Other <sup>4</sup>                                                                         | 3(1)             | 25(10)             | 3(2)                | 4(2)                 | 14(5)              | 0(0)                | 16(6)              | 2(1)              | 5(6)             | 3(1)                | 75(3)             |
| Missing                                                                                    | 0(0)             | 1(0.4)             | 1(0.5)              | 1(0.5)               | 1(0.4)             | 0(0)                | 0(0)               | 0(0)              | 0(0)             | 0(0)                | 4(0.2)            |

<sup>1</sup> Emergency (A&E) route was ascribed when the patient reported pathway to cancer diagnosis involving going or being taken to the emergency department or the PCP reported that the patient presented to emergency department with or without their involvement <sup>2</sup> this could be by PCP, another doctor or via hospital; <sup>3</sup> includes cases where PCP or patient reported routes to diagnosis as ‘Other’ or ‘Missing’ but also reported symptoms or duration of symptoms, or date of first symptom, or waiting time for PCP appointment; <sup>4</sup> includes cases where PCP or patient reported routes to diagnosis as ‘Other’ and hasn’t reported any symptoms or duration of symptoms, or date of first symptom, or waiting time for PCP appointment.

#### *Symptoms prompting visit to physician*

The median number of patient-reported symptoms were 2 (IQR 1,3). Across jurisdictions, the most common patient-reported symptoms were persistent cough (39%), breathlessness (37%) and fatigue (27%) although there was significant variation in proportion of patients presenting with individual symptoms (Table 4).

The PCPs reported a median of 1 (IQR 1,2) symptom at first presentation, with the most common being persistent cough (39%). Across jurisdictions, the reporting of other symptoms by the PCP was significantly lower compared to patients, especially fatigue (4%) and weight loss (8%). When the analysis was restricted to the cohort where both patient and PCP had completed the survey, this difference persisted. Unlike patients, there was minimal variation in PCP reporting of symptoms, with significant differences limited to 'no symptoms', 'other symptoms not previously listed' and weight loss. Overall 64% of symptoms were labelled as 'cancer specific' by the study PCPs (Table 4).

**Table 4.** Symptoms experienced by patients and presenting symptoms noted by PCP for eligible patients. All figures are n(%)

|                                              | Wales   | England | Scotland | N Ireland | Denmark | Manitoba | Ontario | Sweden  | Norway | Victoria | Overall  | p <sup>1</sup>     |
|----------------------------------------------|---------|---------|----------|-----------|---------|----------|---------|---------|--------|----------|----------|--------------------|
| <b>Symptoms (reported by patient)</b>        | (N=211) | (N=252) | (N=198)  | (N=200)   | (N=285) | (N=202)  | (N=288) | (N=211) | (N=88) | (N=208)  | (N=2143) |                    |
| persistent cough                             | 113(54) | 123(49) | 97(49)   | 83(42)    | 97(34)  | 71(35)   | 125(43) | 84(40)  | 10(11) | 39(19)   | 842(39)  | <0.001             |
| breathlessness                               | 109(52) | 126(50) | 82(41)   | 73(37)    | 99(35)  | 63(31)   | 119(41) | 77(36)  | 12(14) | 24(12)   | 784(37)  | <0.001             |
| fatigue                                      | 75(36)  | 79(31)  | 64(32)   | 61(31)    | 38(13)  | 55(27)   | 92(32)  | 60(28)  | 17(19) | 42(20)   | 583(27)  | <0.001             |
| weight loss                                  | 38(18)  | 39(15)  | 44(22)   | 37(19)    | 41(14)  | 29(14)   | 36(13)  | 34(16)  | 9(10)  | 20(10)   | 327(15)  | 0.147              |
| felt sick /vomiting /nausea/loss of appetite | 42(20)  | 33(13)  | 31(16)   | 24(12)    | 33(12)  | 22(11)   | 45(16)  | 28(13)  | 3(3)   | 20(10)   | 281(13)  | 0.132              |
| coughing up blood-stained phlegm (sputum)    | 35(17)  | 32(13)  | 24(12)   | 31(16)    | 21(7)   | 16(8)    | 27(9)   | 25(12)  | 5(6)   | 23(11)   | 239(11)  | 0.014              |
| chest or shoulder pain                       | 23(11)  | 9(4)    | 18(9)    | 24(12)    | 10(4)   | 28(14)   | 43(15)  | 25(12)  | 4(5)   | 22(11)   | 206(10)  | <0.001             |
| other symptoms not listed above              | 51(24)  | 80(32)  | 59(30)   | 54(27)    | 63(22)  | 40(20)   | 30(10)  | 75(36)  | 26(30) | 42(20)   | 520(24)  | <0.001             |
| no symptoms                                  | 29(14)  | 24(10)  | 32(16)   | 21(11)    | 63(22)  | 50(25)   | 67(23)  | 36(17)  | 33(38) | 75(36)   | 430(20)  | <0.001             |
| missing                                      | 1(0.5)  | 16(6)   | 6(3)     | 17(9)     | 31(11)  | 9(4)     | 4(1)    | 4(2)    | 12(14) | 1(0.5)   | 101(5)   | <0.001             |
| <b>Presenting symptom (reported by PCP)</b>  | (N=85)  | (N=133) | (N=115)  | (N=0)     | (N=151) | (N=86)   | (N=61)  | (N=0)   | (N=17) | (N=81)   | (N=729)  |                    |
| persistent cough                             | 33(39)  | 57(43)  | 45(39)   | n/a       | 67(44)  | 24(28)   | 18(30)  | n/a     | 7(41)  | 33(41)   | 284(39)  | 0.093              |
| breathlessness                               | 17(20)  | 27(20)  | 20(17)   | n/a       | 27(18)  | 11(13)   | 11(18)  | n/a     | 4(24)  | 13(16)   | 130(18)  | 0.803              |
| fatigue                                      | 1(1)    | 5(4)    | 3(3)     | n/a       | 9(6)    | 2(2)     | 2(3)    | n/a     | 1(6)   | 3(4)     | 26(4)    | 0.539 <sup>2</sup> |
| weight loss                                  | 5(6)    | 9(7)    | 15(13)   | n/a       | 19(13)  | 3(3)     | 2(3)    | n/a     | 0(0)   | 5(6)     | 58(8)    | 0.027              |
| felt sick /vomiting /nausea/loss of appetite | 1(1)    | 1(0.8)  | 2(2)     | n/a       | 6(4)    | 2(2)     | 0(0)    | n/a     | 0(0)   | 0(0)     | 12(2)    | 0.418 <sup>2</sup> |
| coughing up blood-stained phlegm (sputum)    | 8(9)    | 10(8)   | 10(9)    | n/a       | 7(5)    | 2(2)     | 3(5)    | n/a     | 0(0)   | 7(9)     | 47(6)    | 0.305              |
| chest or shoulder pain                       | 8(9)    | 10(8)   | 15(13)   | n/a       | 15(10)  | 1(1)     | 7(12)   | n/a     | 1(6)   | 4(5)     | 61(8)    | 0.08               |
| other symptoms not listed above              | 24(28)  | 44(33)  | 33(29)   | n/a       | 64(42)  | 15(17)   | 7(12)   | n/a     | 7(41)  | 20(25)   | 214(29)  | <0.001             |

|                                                |        |        |        |     |        |        |        |     |        |        |         |        |
|------------------------------------------------|--------|--------|--------|-----|--------|--------|--------|-----|--------|--------|---------|--------|
| no symptoms                                    | 5(6)   | 6(5)   | 6(5)   | n/a | 2(1)   | 31(36) | 12(20) | n/a | 0(0)   | 10(12) | 72(10)  | <0.001 |
| missing                                        | 7(8)   | 7(5)   | 11(10) | n/a | 16(11) | 12(14) | 6(10)  | n/a | 2(12)  | 10(12) | 71(10)  | 0.392  |
| <b>Cancer-specificity of symptom presented</b> |        |        |        |     |        |        |        |     |        |        |         |        |
| cancer-specific symptom                        | 62(73) | 97(73) | 79(69) | n/a | 94(62) | 36(42) | 38(62) | n/a | 10(59) | 48(59) | 464(64) | <0.001 |
| non-specific symptom                           | 11(13) | 23(17) | 19(17) | n/a | 39(26) | 7(8)   | 5(8)   | n/a | 5(29)  | 13(16) | 122(17) |        |
| no symptoms /missing                           | 12(14) | 13(10) | 17(15) | n/a | 18(12) | 43(50) | 18(30) | n/a | 2(12)  | 20(25) | 143(19) |        |

<sup>1</sup> Differences between jurisdictions (excluding Victoria and Norway) were tested by the Pearson's Chi<sup>2</sup> test, if nothing else stated.

<sup>2</sup> Differences between jurisdictions (excluding Victoria and Norway) were tested by the Fisher's exact test.

### Time intervals

The observed time intervals are shown in Appendix C2 and are summarised in Figure 2. Based on overall trends, jurisdictions could be grouped into those with reduced, longer and similar intervals to Wales (Table 5). It was not possible to interpret variations observed in Norway (small sample size) and Victoria (surgical cohort). In the remaining jurisdictions, there was no difference in the median adjusted patient interval compared to Wales. Denmark had shorter median adjusted primary care interval (-11 days); Sweden had shorter (-20) and Manitoba longer (+40) diagnostic intervals compared to Wales. Denmark (-13), Manitoba (-11), England (-9) and Northern Ireland (-4) had shorter treatment intervals. The median adjusted total interval was shorter only in Denmark (Table 5, Figure 2). The differences were greater for the 90<sup>th</sup> percentile. The total interval in patients who waited longest (90<sup>th</sup> percentile) was significantly shorter in two jurisdictions (Denmark -142, England -28 days) compared to Wales.

**Table 5.** Differences in adjusted intervals (days) between Wales and the other nine jurisdictions for lung cancer patients

| Intervals                                                                    | percentiles              | Wales             | Denmark                           | Sweden         | England       | N Ireland      | Scotland                                         | Manitoba      | Ontario                          | Norway        | Victoria                                      |
|------------------------------------------------------------------------------|--------------------------|-------------------|-----------------------------------|----------------|---------------|----------------|--------------------------------------------------|---------------|----------------------------------|---------------|-----------------------------------------------|
|                                                                              |                          | Reference in days | Overall trend - shorter intervals |                |               |                | Similar with some intervals longer, some shorter |               | Overall trend - longer intervals |               | Difficult to interpret (see text for reasons) |
| Ranking by 5-year survival rates for lung cancers diagnosed in 1999-2007 [5] |                          | 10                | 6                                 | 1              | 9             | 7              | 8                                                | 3             | 2                                | 5             | 4                                             |
| Patient Interval                                                             | Number of patients       | 181               | 233                               | 172            | 213           | 179            | 169                                              | 133           | 205                              | 55            | 141                                           |
|                                                                              | 50th percentile (95% CI) | 21                | -6 (-13,0)                        | -1 (-9,8)      | -3 (-10,5)    | -3 (-13,6)     | -3 (-10,4)                                       | 1 (-8,10)     | 1 (-11,14)                       | 0 (-8,8)      | -9 (-16,-2)                                   |
|                                                                              | 75th percentile (95% CI) | 61                | -13 (-38,13)                      | -2 (-24,21)    | -2 (-42,37)   | -8 (-55,39)    | 1 (-25,27)                                       | 3 (-23,30)    | -7 (-54,39)                      | -9 (-60,42)   | -4 (-46,38)                                   |
|                                                                              | 90th percentile (95% CI) | 216               | -34 (-55,-13)                     | -1 (-25,23)    | -15 (-42,12)  | 24 (-21,70)    | 43 (7,79)                                        | -35 (-59,-10) | -34 (-66,-2)                     | 59 (21,96)    | -35 (-49,-21)                                 |
| Primary Care interval                                                        | Number of patients       | 110               | 159                               | N/A            | 147           | 124            | 119                                              | 80            | 75                               | 19            | 89                                            |
|                                                                              | 50th percentile (95% CI) | 20                | -11 (-18,-3)                      |                | -7 (-17,3)    | -5 (-15,4)     | -3 (-14,8)                                       | 7 (-8,21)     | 5 (-9,19)                        | -11 (-18,-4)  | -8 (-17,1)                                    |
|                                                                              | 75th percentile (95% CI) | 43                | -29 (-47,-12)                     | N/A            | -17 (-42,8)   | 1 (-45,48)     | -11 (-36,14)                                     | 19 (-47,85)   | 20 (-72,112)                     | -10 (-57,37)  | -12 (-70,46)                                  |
|                                                                              | 90th percentile (95% CI) | 91                | -30 (-66,7)                       |                | -39 (-85,6)   | 17 (-55,90)    | -20 (-67,25)                                     | 13 (-38,65)   | 102 (-56,258)                    | -22 (-109,66) | -19 (-89,51)                                  |
| Diagnostic interval                                                          | Number of patients       | 176               | 229                               | 165            | 212           | 170            | 173                                              | 138           | 212                              | 52            | 160                                           |
|                                                                              | 50th percentile (95% CI) | 45                | -12 (-25,1)                       | -20 (-35,-5)   | 9 (-3,21)     | 17 (-5,39)     | -4 (-16,8)                                       | 40 (14,66)    | 10 (-6,26)                       | 4 (-16,24)    | 7 (-13,27)                                    |
|                                                                              | 75th percentile (95% CI) | 108               | -45 (-52,-39)                     | -22 (-30,-15)  | -7 (-20,7)    | 12 (2,22)      | -15 (-32,1)                                      | 35 (22,48)    | 5 (-9,19)                        | -4 (-15,8)    | -2 (-8,4)                                     |
|                                                                              | 90th percentile (95% CI) | 162               | -27 (-153,99)                     | -34 (-206,138) | -14 (-100,72) | 112 (-165,389) | 31 (-81,143)                                     | 112 (32,192)  | 106 (-122,335)                   | 0 (-93,93)    | 62 (10,114)                                   |
| Treatment interval                                                           | Number of patients       | 192               | 279                               | 190            | 238           | 200            | 187                                              | 182           | 263                              | 87            | 199                                           |
|                                                                              | 50th percentile (95% CI) | 43                | -13 (-15,-11)                     | -2 (-8,3)      | -9 (-12,-5)   | -4 (-7,-2)     | 0 (-4,4)                                         | -11 (-17,-5)  | 3 (-4,10)                        | -8 (-11,-6)   | -29 (-32,-27)                                 |
|                                                                              | 75th percentile (95% CI) | 64                | -32 (-36,-28)                     | -2 (-8,4)      | -18 (-23,-13) | -13 (-18,-7)   | 1 (-7,9)                                         | -5 (-16,6)    | 6 (-2,14)                        | -13 (-19,-8)  | -33 (-41,-25)                                 |
|                                                                              | 90th percentile (95% CI) | 89                | -45 (-50,-40)                     | -10 (-17,-4)   | -28 (-36,-20) | -16 (-23,-9)   | -6 (-14,1)                                       | 4 (-5,13)     | 4 (-4,13)                        | -22 (-30,-14) | -39 (-45,-32)                                 |
| Total                                                                        | Number of patients       | 147               | 192                               | 147            | 176           | 153            | 143                                              | 117           | 178                              | 52            | 113                                           |

|          |                          |     |                  |              |                |              |               |              |                                   |                |                    |
|----------|--------------------------|-----|------------------|--------------|----------------|--------------|---------------|--------------|-----------------------------------|----------------|--------------------|
| interval | 50th percentile (95% CI) | 116 | -49 (-95,-3)     | -8 (-64,47)  | -7 (-52,38)    | -16 (-41,10) | -2 (-70,66)   | 11 (-41,63)  | 9 (-78,97)                        | -34 (-56,-12)  | -32 (-64,2)        |
|          | 75th percentile (95% CI) | 204 | -91 (-270,87)    | -17 (-40,7)  | -29 (-175,118) | 5 (-191,201) | 33 (-144,211) | 13 (-77,103) | -7 (-331,317)                     | -39 (-107,29)  | -23 (-61,14)       |
|          | 90th percentile (95% CI) | 365 | -142 (-150,-134) | -18 (-59,23) | -28 (-37,-18)  | 0 (-4,5)     | 15 (-26,55)   | 15 (-26,55)  | 0 (-78,79)                        | -84 (-119,-49) | 0 (-3,3)           |
|          |                          |     |                  |              |                |              |               |              | <b>Interval relative to Wales</b> | <b>Trends</b>  | <b>Significant</b> |
|          |                          |     |                  |              |                |              |               |              | Reduction                         |                |                    |
|          |                          |     |                  |              |                |              |               |              | Increase                          |                |                    |

The majority of patients were diagnosed between 2013-14. The differences were calculated for the 50<sup>th</sup>, 75<sup>th</sup> and 90<sup>th</sup> percentiles by setting age to its mean value and gender and comorbidity to their modes (i.e. male gender and medium comorbidity). It is not possible to interpret differences observed for Norway (due to the small sample size) and Victoria (the cohort was limited to those who had undergone surgery).

FIGURE 2

### Sensitivity and validity analyses

The estimates of routes to diagnosis, time intervals, and regression analysis trends were not significantly altered by changing the cut-off to 6 months or using only patient data (results not shown).

Appendix C3 details, which sources were used based on the standardization rules, to define dates and also how often a day in the date was imputed. With regards to the dates of first presentation to healthcare (CCC=0.91), diagnosis (CCC ≥ 0.93) and treatment (CCC=0.94), there was adequate agreement between all data sources where the data on these dates was collected. Agreement between patient versus PCP for dates of first presentation to healthcare (CCC=0.91) and diagnosis (CCC=0.93) was also adequate as was agreement between patient versus CTS for dates of diagnosis (CCC=0.94) and treatment (CCC=0.94).

Omitting time intervals which were negative or over 365 days (Appendix C4) led to change in direction of difference which was non-significant in long intervals (75<sup>th</sup> or 90<sup>th</sup> percentile) between Wales and jurisdictions in four cases: Norway and Victoria (patient interval), N Ireland (diagnostic interval), England (total interval). All other results were similar to the main results.

## Discussion

### Main findings

This is the first international study we are aware of comparing lung cancer routes and time intervals. With the exception of Denmark, in all other jurisdictions, the median total interval

1  
2  
3 from symptom onset to treatment, for respondents diagnosed in 2012-15 was similar to that  
4 of Wales, the reference. However, there were jurisdiction specific differences in patient,  
5 diagnostic and treatment intervals, especially for the 10% of patients who waited the longest.  
6  
7 Based on overall trends, jurisdictions could be grouped into those with trends of reduced,  
8 longer and similar intervals to Wales.  
9  
10

11  
12 Across jurisdictions, all symptoms other than persistent cough were less frequently reported  
13 by the PCP when compared to patients. This was especially true for fatigue and weight loss.  
14 One in four patients reported incidental diagnosis and one in ten were diagnosed following a  
15 visit to the emergency (A&E) department.  
16  
17  
18  
19

### 20 *Strengths and weaknesses*

21  
22 Our study helps address the shortcomings of current international comparisons across  
23 multiple national studies with significant variation in methodology including differences in  
24 definition of intervals. Strengths of our study include 1) use of the same methodology across  
25 countries 2) use of cancer registries to identify consecutive newly diagnosed patients; 3) use  
26 of standardised questionnaires; 4) inclusion of PCP and CTS questionnaires enriched by  
27 registry data; 5) minimal data interpretation by the local teams with all data cleaning performed  
28 in a standardised manner centrally; and 6) triangulation with comprehensive data rules to  
29 ensure validity, consistency and preserve statistical precision.[21] Recall bias was minimised  
30 by the triangulation of different data sources and by patients completing the questionnaire  
31 within a limited time window (median 5 months) after the cancer diagnosis.  
32  
33  
34  
35  
36  
37  
38  
39

40 A key limitation, as with all questionnaire-based studies was both selection and non-response  
41 bias which varied across jurisdictions and has implications for interpretation and generalisation  
42 of findings [34]. In comparing intervals, we adjusted for age, sex and comorbidity but were  
43 unable to adjust for ethnicity and education due to different classification systems. Recall bias  
44 was minimised by the triangulation of different data sources and by patients completing the  
45 questionnaire within a limited time window (median 5 months) after the cancer diagnosis.  
46 Recruitment of patients up to 9 rather than 6 months after diagnosis might have magnified the  
47 selection bias due to high mortality.[35] However, sensitivity analysis suggests that this did  
48 not impact on the results. Categorising presenting symptoms into indicative or not was done  
49 pragmatically as existing guidelines for lung cancer investigation vary across ICBP  
50 jurisdictions.[36] In Norway and Victoria, a small sample size and restriction of eligibility to  
51 only surgical patients, respectively, made comparison difficult. Nonetheless, significant  
52 differences in these two jurisdictions compared to Wales were largely limited to the treatment  
53 interval alone.  
54  
55  
56  
57  
58  
59  
60

1  
2  
3  
4  
5 There was variation in stage distribution across jurisdictions. While this may be partly related  
6 to the varying response rate, true differences in lung cancer stage have been noted on  
7 analysis of registry data of patients diagnosed between 2004-2007.[6] The high lung cancer  
8 mortality and self-selection are likely to have contributed to an over-representation of early  
9 stage disease and tumours treated with surgical resection. This suggests that true variation  
10 may well be higher than that reported in this cohort of 'healthier early stage' patients.  
11  
12  
13  
14

### 15 *Comparison to other studies*

16 The most common patient-reported symptoms, in keeping with the literature, were persistent  
17 cough, breathlessness, fatigue and weight loss, with one in five reporting 'no symptoms'. [18]  
19 Only a minority (11%) of our respondents reported coughing blood or bloody sputum/spit,  
20 which is the only consistent predictor of lung cancer. [37] While haemoptysis was reported in  
21 a prospective survey (England 2011-12) by 22% of lung cancer patients identified through  
22 respiratory clinics, it was a presenting symptom in only 5% of cases. [11]  
23  
24  
25  
26  
27

28 The median number of symptoms reported by patients was more than that reported by the  
29 PCP in all jurisdictions. This was especially so for fatigue and weight loss. A number of factors  
30 could have contributed to this - patients not listing all symptoms at presentation, patients  
31 having a different understanding/recall of their symptoms post diagnosis, PCPs only recording  
32 key symptoms such as cough. Further research on under reporting of systemic symptoms  
33 such as fatigue and weight loss is warranted.  
34  
35  
36  
37  
38

39 As lung cancer mortality is higher in patients attending emergency (A&E) departments, the  
40 rates are often compared in an attempt to understand international survival differences. [38]  
41 The rate of respondents who attended A&E varied two-fold across jurisdictions from 9-10% in  
42 England, Scotland and Denmark to 18-20% in Northern Ireland, Ontario and Manitoba. While  
43 rates for Scotland (10%) were similar to that reported in a prospective Scottish audit (11.5%),  
44 as were rates for Denmark (7% vs 6.3% when PCP not involved), rates for England (9%) were  
45 lower than those reported in population based audits (25%) reflecting non-response  
46 bias. [14,15] In Victoria (4%) restriction of the cohort to surgical patients is likely to have  
47 accounted for the very low rates.  
48  
49  
50  
51  
52  
53  
54

55 Our reported median patient, primary care and diagnostic intervals are in keeping with those  
56 previously reported from the participating jurisdictions (Table 6). Minor variations in interval  
57 estimates are likely due to differences in data source, sample size and cohort  
58 characteristics. [39] Longer intervals were reported from earlier cancer cohorts - median  
59  
60

1  
2  
3 primary care interval for England of 52 days in 1998-2000 (our median 11),[13] median total  
4 interval for Denmark of 108 days in 2004-5 (our median 67) and Norway of 118 in 2002-5 (our  
5 median 79).[17-19,24]  
6  
7  
8  
9  
10  
11  
12  
13  
14  
15  
16  
17  
18  
19  
20  
21  
22  
23  
24  
25  
26  
27  
28  
29  
30  
31  
32  
33  
34  
35  
36  
37  
38  
39  
40  
41  
42  
43  
44  
45  
46  
47  
48  
49  
50  
51  
52  
53  
54  
55  
56  
57  
58  
59  
60

For peer review only

**Table 6.** Summary of literature on intervals in lung cancer patients diagnosed since 2000 in the ICBP Module 4 countries

| Study No | Ref                          | Study Period   | Jurisdiction            | Design                                                                                                                               | Patients                                                                                                                                              | No. of lung cancer patients      | Interval <sup>1</sup> (days)                                       |                         |                         |                        | Total interval          |
|----------|------------------------------|----------------|-------------------------|--------------------------------------------------------------------------------------------------------------------------------------|-------------------------------------------------------------------------------------------------------------------------------------------------------|----------------------------------|--------------------------------------------------------------------|-------------------------|-------------------------|------------------------|-------------------------|
|          |                              |                |                         |                                                                                                                                      |                                                                                                                                                       |                                  | Patient                                                            | Primary care            | Diagnostic              | Treatment              |                         |
| 1        | Walter FM et al (2015)       | 2011-2         | England, UK             | Prospective patient questionnaire survey - multi hospital cohort. Dates of diagnosis based on medical note review.                   | All attending urgent and routine respiratory clinics across the five hospitals in England aged over 40 years with symptoms suspicious of lung cancer. | 153                              | Interval from first symptom to diagnosis Median 91 (IQR 49-184)    |                         |                         |                        |                         |
| 2        | Lyratzopoulos G et al (2015) | 2009-10        | England, UK             | Prospective national audit of cancer diagnosis using primary practice patient records and continuous sampling during audit period    | All patients aged $\geq 15$ years who had first presented to a primary care practitioner and were subsequently diagnosed with one of 28 cancers       | 1128                             | Median 11 (IQR 0-32)                                               | Median 3 (IQR 14-39)    |                         |                        |                         |
| 3        | Neal R et al (2014)          | 2007-8         | UK                      | Retrospective analysis of electronic health record data from General Practice Research Database - population cohort                  | All newly diagnosed with one of 15 cancers                                                                                                            | 2851                             |                                                                    |                         | Median 112 (IQR 45-251) |                        |                         |
| 4        | Barrett J et al (2008)       | 1998-2002      | Exeter, England, UK     | Retrospective case-control review of PCP records - population cohort                                                                 | All with lung cancer aged $\geq 40$ years, identified from the hospital cancer registry and computerised searches of all primary care practices       | 247                              |                                                                    | Median 52 (IQR 7-243)   |                         |                        |                         |
| 5        | Baughan P et al (2009)       | 2005-6, 2007-8 | Scotland, UK            | Retrospective audit involving PCP review of medical records of all newly diagnosed cancer patients they had seen - population cohort | All newly diagnosed with lung cancer                                                                                                                  | 981                              | Median 9.5 (IQR 31)                                                |                         | Median 11 (IQR 28)      |                        |                         |
| 6        | Guldbrandt LM et al (2015)   | 2010           | Denmark                 | Retrospective PCP questionnaires survey of national registry-based population cohort                                                 | All consecutive newly diagnosed lung cancer patients                                                                                                  | 429-442 depending on interval    |                                                                    | Median 7 (IQR, 0-30)    | Median 29 (IQR, 12-69)  |                        |                         |
| 7        | Tørring ML et al (2013)      | 2004 - 5       | Aarhus, Denmark         | Prospective, population-based study using electronic health records and PCP survey of identified patients                            | All newly diagnosed with lung cancer after attending primary care                                                                                     | 262                              |                                                                    |                         | Median 112 (IQR 45-251) |                        |                         |
| 8        | Hansen RP et al (2011)       | 2004-5         | Aarhus, Denmark         | Retrospective PCP survey                                                                                                             | Cancer patients newly diagnosed during a 1-year period identified using administrative registry data                                                  | 128-251 (depending on interval)  | Median 28 (IQR 7-56)                                               | Median 0 (IQR 0-9)      |                         | Median 51 (IQR 27-76)  | Median 108 (IQR 82-167) |
| 9        | Bjerager M et al (2006)      | 2003           | Aarhus, Denmark         | Retrospective PCP survey using structured telephone interviews enriched with administrative registry data - population-based cohort  | All lung cancer patients identified through histological and cytological tests from county-based registers                                            | 84                               |                                                                    | Median 32.5 (IQR 12-68) |                         |                        |                         |
| 10       | Rolke HB et al (2006)        | 2002-5         | Norway (South)          | Retrospective questionnaire-based patient survey - hospital cohort                                                                   | All newly diagnosed with lung cancer                                                                                                                  | 273 -376 (depending on interval) | Median 19 (2-77)                                                   |                         |                         |                        | Median 118 (IQR 68-220) |
| 11       | Stokstad T et al (2017)      | 2011-13        | Norway                  | Retrospective medical record audit -single hospital cohort                                                                           | All cases that started diagnostic work-up and were diagnosed with lung cancer at St. Olavs Hospital, Trondheim                                        | 449                              |                                                                    |                         |                         | 42 days (range: 2-296) |                         |
| 12       | Largey G et al (2016)        | 2013           | Victoria, Australia     | Retrospective medical record audit -three hospital cohort                                                                            | Admitted with a new diagnosis of lung cancer over a three month period in three hospitals                                                             | 78                               |                                                                    |                         |                         | Mean 30.4 (SD 45.3)    |                         |
| 13       | Evans SM et al (2016)        | 2011-4         | Victoria, Australia     | Retrospective medical record audit - multi hospital cohort                                                                           | All lung cancer patients newly diagnosed in six public and two private hospitals                                                                      | 1417                             |                                                                    |                         | Median 15 (IQR, 5-36)   | Median 30 (IQR, 6-84)  |                         |
| 14       | Emery JD et al (2017)        | 2012 -4        | Western rural Australia | Prospective cluster randomised trial of symptom awareness                                                                            | Lung cancer patients newly diagnosed in the control arm of the trial                                                                                  | 167                              | Interval from first symptom to diagnosis Median 34.5 (IQR 7 103.5) |                         |                         |                        |                         |

|    |                                  |        |                      |                                                                                                                                                                                           |                                                                                                    |      |  |           |                                                               |  |                         |
|----|----------------------------------|--------|----------------------|-------------------------------------------------------------------------------------------------------------------------------------------------------------------------------------------|----------------------------------------------------------------------------------------------------|------|--|-----------|---------------------------------------------------------------|--|-------------------------|
| 15 | Burneister BH et al (2010)       | 2000-4 | Queensland Australia | Retrospective analysis of radiation therapy waiting times                                                                                                                                 | All lung cancer patients who received radiation therapy as initial treatment at a public hospital. | 1535 |  |           |                                                               |  | Median 33 <sup>2</sup>  |
| 16 | Ellis PM and Vandermeer R (2011) | 2010   | Ontario, Canada      | Retrospective patient survey using structured telephone interviews - single centre cohort. Appointment dates and diagnostic tests verified through family doctor or patient chart review. | All lung cancer patients referred to a regional cancer centre                                      | 52   |  | Median 21 | Median 27 (IQR 0-38)                                          |  | Median 138 (IQR 79-175) |
| 17 | Lo DS et al (2007)               | 2005-7 | Ontario, Canada      | Retrospective medical record audit - multi hospital cohort                                                                                                                                | All with lung cancer seen on a newly implemented Time to Treat Program                             | 144  |  |           | Median interval from suspicion of lung cancer to diagnosis 37 |  |                         |

<sup>1</sup> Intervals as defined in Figure 1; <sup>2</sup> Limited to patients receiving radiation treatment

1  
2  
3  
4  
5 Across all jurisdictions, there was no significant difference in primary care intervals for the 10%  
6 of patients with longest interval. It is likely that these patients had vague or non-specific  
7 symptoms and signs. Referral guidelines for suspected lung cancer do not always favour  
8 patients with early symptoms and often prioritise those with more advanced disease.[40]  
9 Access to better diagnostic tools such as low-dose CT chest in the primary care setting may  
10 favour this group of patients.[41] It would be useful in future projects to explore whether such  
11 access may have contributed to the improved 1-year lung cancer survival rates reported from  
12 Australia and Canada.[6]  
13  
14  
15  
16  
17  
18

19 Diagnostic intervals were significantly longer for Manitoba compared to other jurisdictions and  
20 twice that reported in an ongoing local PCP audit (personal communication). While one might  
21 suspect overestimation due to differences in the source of date of first presentation, between  
22 our study (in almost half, it was derived from patients) and local audit, this is less likely as the  
23 concordance coefficient between PCP and patient derived data at Manitoba was 0.94.  
24  
25  
26  
27  
28

29 Observed median treatment intervals were below 6 weeks for nearly all jurisdictions. This was  
30 the only interval where there were significant differences between jurisdictions with Denmark,  
31 England, Norway and Northern Ireland all having shorter adjusted treatment intervals across  
32 all percentiles, with larger differences for the 75<sup>th</sup> and 90<sup>th</sup> percentile. These improvements  
33 may reflect implementation of waiting time targets in Denmark (35-38 days from first  
34 consultation depending on treatment modality) and the UK (31 days from decision to  
35 treat).[42,43] The shorter treatment intervals in Norway are in keeping with long-standing  
36 provision of standardized cancer care pathways and effective coordination between primary  
37 care and treatment centers. While a systematic review did not find evidence to support an  
38 association between intervals and lung cancer outcomes, increasing mortality with longer  
39 diagnostic intervals was noted in a more recent, high-quality study.[16] In 2000, O'Rourke  
40 reported median intervals of 94 days (35-187) between the first hospital visit and starting  
41 treatment resulting in 21% of potentially curable patients becoming incurable.[44] Others have  
42 found metabolic evidence on PET/CT of pre-treatment disease progression in 21% and TNM  
43 upstaging in 18% of small-cell lung cancer patients after a relatively short median inter-scan  
44 interval of 43 days.[45] Long intervals can also result in deterioration in performance status.  
45 More recently, there is concern that the need for genotyping may result in further increase in  
46 time to treatment.  
47  
48  
49  
50  
51  
52  
53  
54  
55  
56  
57

58 The shorter total interval in Denmark likely reflects the significant reductions in cancer waiting  
59 times following a collaborative effort to set-up and implement a national centralised quality  
60

1  
2  
3 management system, the Danish Cancer Patient Pathways (CPPs). The latter includes PCP  
4 access to fast-track diagnostic work-up.[46]. The findings are in keeping with higher relative  
5 survival and lower mortality in Denmark among symptomatic cancer patients diagnosed  
6 through primary care after the implementation of CPPs and with the accelerated increase in  
7 5-year survival among Danish lung cancer patients diagnosed in 2010-2014 when compared  
8 to patients from earlier time periods.[47] While there is some inherent lead-time bias, the  
9 findings highlight the importance and feasibility of a timely diagnosis of lung cancer.  
10  
11  
12  
13  
14

### 15 16 *Conclusions*

17 The study provides for the first time, comparable data, collected through consistent methods  
18 in all jurisdictions, allowing for detailed comparisons of key diagnostic intervals in lung  
19 cancer and routes to diagnosis. While all jurisdictions except Denmark, had similar median  
20 adjusted total intervals, there were jurisdiction-specific significant differences in patient,  
21 diagnostic and treatment intervals, especially for the 10% of patients who waited the longest.  
22 The proportion of patients diagnosed following presentation to the PCP ranged from 35-  
23 75%. These data could help individual jurisdictions to better target their efforts to reduce  
24 time to treatment and ultimately improve patient experience and outcomes in lung cancer.’  
25  
26  
27  
28  
29  
30

31 Intervals and pathways are ultimately of interest as they relate to prognosis. A further analysis  
32 which includes all four cancers (lung, ovary, colon and breast) surveyed in ICBP4 module and  
33 explores the impact of these intervals on stage and 1-year survival is underway.  
34  
35  
36  
37

### 38 **List of abbreviations**

39 ICBP M4 – International Cancer Benchmarking Partnership Module 4  
40 PCP – Primary Care Physician  
41 CTS – Cancer Treatment Specialist  
42 CPP – Danish Cancer Patient Pathways  
43  
44  
45  
46  
47

### 48 **Figure headings**

49 Figure 1: Time intervals from onset of symptoms to start of treatment based on the Aarhus  
50 Statement

51 Figure 2: Differences in 50th, 75th and 90th centiles of the intervals (days) between Wales as the  
52 reference and the other nine jurisdictions. The data are adjusted for differences in age, gender and  
53 comorbidity. The bars in black show significant differences in intervals.  
54  
55

### 56 **Acknowledgement**

57 We are grateful to Catherine Foot, Martine Bomb, Brad Groves of Cancer Research UK for  
58 managing the programme. The ICBP Module 4 Working Group (below) for their support and  
59  
60

1  
2  
3 work keeping the study going. Christian Finley (Canada), David Baldwin (England) for  
4 reviewing the manuscript. Stefan Bergström, Jan Willem Coebergh, Jon Emery, Monique E  
5 van Leerdam, Marie-Louise Essink-Bot and Una MacLeod (the ICBP M4 Academic Reference  
6 Group) for providing independent peer review of the study protocol and analysis plan  
7 development. We thank all the patients, primary care physicians, cancer treatment specialists,  
8 and registry staff of all jurisdictions who took part in this study, and also the Danish Lung  
9 Cancer Registry for providing clinical information for the study.  
10  
11  
12  
13

#### 14 **ICBP Module 4 Working Group**

15  
16 Alina Zalounina Falborg, (Research Unit for General Practice, Department of Public Health,  
17 Aarhus University), Andriana Barisic (Department of Prevention and Cancer Control, Cancer  
18 Care Ontario), Anna Gavin (Northern Ireland Cancer Registry, Centre for Public Health,  
19 Queen's University Belfast), Anne Kari Knudsen (European Palliative Care Research Centre  
20 (PRC), Department of Oncology, Oslo University Hospital and Institute of Clinical Medicine),  
21 Breann Hawryluk (Department of Patient Navigation, Cancer Care Manitoba), Chantelle  
22 Anandan (Centre for Population Health Sciences, University of Edinburgh), Conan Donnelly  
23 (Centre for Public Health, Queen's University Belfast), David H Brewster, Scottish Cancer  
24 Registry, Information Services Division, NHS National Services Scotland, David Weller  
25 (Centre for Population Health Sciences, University of Edinburgh), Donna Turner (Population  
26 Oncology, Cancer Care Manitoba), Elizabeth Harland (Department of Epidemiology and  
27 Cancer Registry, CancerCare Manitoba), Eva Grunfeld (Knowledge Translation Research  
28 Network Health Services Research Program, Ontario Institute for Cancer Research;  
29 Professor and Vice Chair Research Department of Family and Community Medicine,  
30 University of Toronto), Evangelia Ourania Fourkala (Gynaecological Cancer Research  
31 Centre, Women's Cancer, Institute for Women's Health, University College London), Henry  
32 Jensen (Research Unit for General Practice, Department of Public Health, Aarhus  
33 University), Irene Reguilon (International Cancer Benchmarking Partnership, Cancer  
34 Research UK), Jackie Boylan (Centre for Public Health, Queen's University Belfast),  
35 Jacqueline Kelly (Northern Ireland Cancer Registry, Centre for Public Health, Queen's  
36 University Belfast), Jatinderpal Kalsi (Gynaecological Cancer Research Centre, Women's  
37 Cancer, Institute for Women's Health, University College London), John Butler (The Royal  
38 Marsden) Kerry Moore, Centre for Public Health, Queen's University Belfast, Martin  
39 Malmberg (Department of Oncology, Lund University Hospital), Mats Lambe (Regional  
40 Cancer Center Uppsala and Department of Medical Epidemiology and Biostatistics, Karolinska  
41 Institutet), Oliver Bucher (Department of Epidemiology and Cancer Registry, CancerCare  
42 Manitoba), Peter Vedsted, Research Unit for General Practice, Department of Public Health,  
43 Aarhus University, Rebecca-Jane Law (North Wales Centre for Primary Care Research,  
44 Bangor University), Rebecca Bergin (Centre for Behavioural Research in Cancer;  
45 Department of General Practice, University of Melbourne), Richard D Neal (North Wales  
46 Centre for Primary Care Research, Bangor University; Academic Unit of Primary Care,  
47 Leeds Institute of Health Sciences, University of Leeds), Samantha Harrison, Early  
48 Diagnosis and International Cancer Benchmarking Partnership, Policy and Information,  
49 Cancer Research UK, Sigrun Saur Almberg (Department of Cancer Research and Molecular  
50 Medicine, Faculty of Medicine, Norwegian University of Science and Technology (NTNU),  
51 Therese Kearney (Northern Ireland Cancer Registry, Centre for Public Health, Queen's  
52 University Belfast), Victoria Cairnduff (Northern Ireland Cancer Registry, Centre for Public  
53 Health, Queen's University Belfast), Victoria Hammersley (Centre for Population Health  
54 Sciences, University of Edinburgh), Victoria White (Centre for Behavioural Research in  
55 Cancer, Cancer Council Victoria Road; School of Psychology Deakin University), Usha  
56 Menon (Gynaecological Cancer Research Centre, Women's Cancer, Institute for Women's  
57 Health, University College London), Yulan Lin (European Palliative Care Research Centre  
58 (PRC), Department of Oncology, Oslo University Hospital and Institute of Clinical Medicine)  
59  
60

**ICBP Programme Board:**

Aileen Keel (Scottish Government, Edinburgh, Scotland); Anna Boltong (Cancer Council Victoria, Carlton, Australia); Anna Gavin (Northern Ireland Cancer Registry, Queens University, Belfast, UK); David Currow (Cancer Institute New South Wales, Sydney, Australia); Gareth Davies (Wales Cancer Network, Cardiff, UK); Gunilla Gunnarsson (Swedish Association of Local Authorities and Regions, Stockholm, Sweden); Heather Bryant (Canadian Partnership Against Cancer, Toronto, Canada); Jane Hanson (Welsh Cancer National Specialist Advisory Group, Cardiff, UK); Kathryn Whitfield (Department of Health, Victoria Australia); Linda Rabeneck (Cancer Care Ontario, Toronto, Canada); Michael A Richards (Care Quality Commission, London, UK); Michael Sherar (Cancer Care Ontario, Toronto, Canada); Nicola Quin (Cancer Council Victoria, Carlton, Australia); Nicole Mittmann (Cancer Care Ontario, Toronto, Canada); Robert Thomas (Department of Health and Human Services, Victoria, Melbourne, Australia); Sara Hiom (Cancer Research UK); Sean Duffy (NHS England, London, UK); Chris Harrison (NHS England, London, UK); Søren Brostrøm (Danish Health and Medicines Authority, Copenhagen, Denmark); Stein Kaasa (University Hospital of Trondheim, Trondheim, Norway).

**ICBP Academic Reference Group**

Prof Jan Willem Coebergh, Professor of Cancer Surveillance, Department of Public Health, Erasmus Universiteit Rotterdam, Rotterdam, the Netherlands Jon Emery, Professor of Primary Care Cancer Research, University of Melbourne and Clinical Professor of General Practice, University of Western Australia, Australia Dr Stefan Bergström, Senior consultant oncologist, Department of Oncology, Gävle, Sweden Dr Monique E van Leerdam, Erasmus MC University Medical Centre, the Netherlands Prof Marie-Louise Essink-Bot, Academic Medical Centre, Amsterdam University, the Netherlands Prof Una MacLeod, Senior Lecturer in General Practice and Primary Care, Hull-York Medical School, United Kingdom

**Author's contribution**

UM, DW, PV, AZF, HJ planned the study design, data collection, carried out the analyses and wrote the draft manuscript. UM, PV, DW, HJ, AB, AKK, RJB, DHB, JK, VC, ATG, EG, EH, ML, RJW, YL, MM, DT, RDN, VW, IR and SH were responsible for local data collection (alongside the Working Group), management and interpretation, and have participated in writing and have approving the final manuscript version. JB, OB and OTB provided advice on the interpretation of results in their respective jurisdictions and comments or substantial edits on the manuscript, approving the final version.

## Competing Interests

None

## Data Availability statement

No additional data available

## Funding:

This work was supported by: CancerCare Manitoba; Cancer Care Ontario; Canadian Partnership Against Cancer (CPAC); Cancer Council Victoria; Cancer Research Wales; Cancer Research UK; Danish Cancer Society; Danish Health and Medicines Authority; European Palliative Care Research Centre (PRC), Norwegian University of Science and Technology (NTNU); Northern Ireland Guidelines Audit and Implementation Network (GAIN); Macmillan Cancer Support; National Cancer Action Team; NHS England; Northern Ireland Cancer Registry, funded by the Public Health Agency NI; Norwegian Directorate of Health; Research Centre for Cancer Diagnosis in Primary Care (CaP), Aarhus University, Denmark; Scottish Government; Swedish Association of Local Authorities and Regions; University College London and NIHR Biomedical Research Centre at University College London NHS Foundation Trust; University of Edinburgh; Victorian Department of Health and Human Services; Welsh Government. The funding bodies had no influence on the design of the study and collection, analysis, and interpretation of data, in writing the manuscript or whether to publish the results.

## Availability of data and material

The data that support the findings of this study are available from the named authors from each ICBP jurisdiction, but restrictions apply to the availability of these data and so are not publicly available. Data are however available from the authors upon reasonable request and with permission of the ICBP Programme Board. Please contact the ICBP Programme Management team, based at Cancer Research UK, with any queries ([icbp@cancer.org.uk](mailto:icbp@cancer.org.uk)).

## Ethics approval and consent to participate

For each local data collection, there were specific procedures and approvals which included anonymised data transfer to University College London and Aarhus University. Approvals were received from the following institutions: Cancer Council Victoria Human Research Ethics Committee [HREC 1125]; Health Research Ethics Board, University of Manitoba [HS15227 (H2012:105)]; Research Resource Ethics Committee, CancerCare Manitoba [RRIC#28-2012];

1  
2  
3 University of Toronto Research Ethics Board [27881]; The Danish Data Protection Agency  
4 [2013-41-2030]; Swedish Ethics Review Board, Uppsala [2013/306]; Norway Regional  
5 committees for medical and health research ethics [2013/136/REK nord]; England, Wales and  
6 Scotland, NRES Committee East Midlands – Derby 2, local R&D for each health board  
7 [11/EM/0420]; Northern Ireland ORECNI Ethical approval, local governance for each health  
8 Trust [11/EM/0420].  
9  
10  
11  
12  
13  
14  
15  
16  
17  
18  
19  
20  
21  
22  
23  
24  
25  
26  
27  
28  
29  
30  
31  
32  
33  
34  
35  
36  
37  
38  
39  
40  
41  
42  
43  
44  
45  
46  
47  
48  
49  
50  
51  
52  
53  
54  
55  
56  
57  
58  
59  
60

For peer review only

## References

1. Ferlay J, Steliarova-Foucher E, Lortet-Tieulent J, et al. Cancer incidence and mortality patterns in Europe: Estimates for 40 countries in 2012. *Eur J Cancer* 2013;49(6):1374-403.
2. Allemani C, Weir HK, Carreira H, et al. Global surveillance of cancer survival 1995-2009: analysis of individual data for 25 676 887 patients from 279 population-based registries in 67 countries (CONCORD-2). *Lancet* 2015;385(9972):977-1010.
3. Australian Institute of Health and Welfare 2012. Cancer survival and prevalence in Australia: period estimates from 1982 to 2010. Cancer Series no. 69. Cat. no. CAN 65. Canberra: AIHW <https://www.aihw.gov.au/getmedia/da7bff73-5b78-4cf8-a719-5903a75fcc9a/13953.pdf.aspx?inline=true>
4. Neal RD, Robb  IJ, Lewis M, Williamson I, Hanson J. The complexity and difficulty of diagnosing lung cancer: findings from a national primary-care study in Wales. *Prim Health Care Res Dev* 2015 Sep;16(5):436-49
5. Francisci S, Minicozzi P, Pierannunzio D, et al. Survival patterns in lung and pleural cancer in Europe 1999-2007: Results from the EURO CARE-5 study. *Eur J Cancer* 2015;51(15):2242-53.
6. Coleman MP, Forman D, Bryant H, et al. Cancer survival in Australia, Canada, Denmark, Norway, Sweden, and the UK, 1995-2007 (the International Cancer Benchmarking Partnership): an analysis of population-based cancer registry data. *Lancet* 2011;377(9760):127-38.
7. Olsson JK, Schultz EM, Gould MK. Timeliness of care in patients with lung cancer: a systematic review. *Thorax*. 2009;64(9):749-56
8. Malalasekera A, Nahm, S, Blinman PL, Kao SC, Dhillon H, Vardy J. How long is too long? A Scoping Review of Health System delays in lung cancer. *European Respiratory Reviews*. 2018; 29;27(149)
9. Jacobsen MM, Silverstein SC, Quinn M, Waterston LB, Thomas CA, Benneyan JC, et al. Timeliness of access to lung cancer diagnosis and treatment: A scoping literature review. *Lung Cancer-J Intlc*. 2017;112:156-64.
10. Vinas F, Ben Hassen I, Jabot L, Monnet I, Chouaid C. Delays for diagnosis and treatment of lung cancers: a systematic review. *Clin Respir J*. 2016;10(3):267-

- 1  
2  
3  
4  
5 11. Walter FM, Rubin G, Bankhead C, et al. Symptoms and other factors associated with  
6 time to diagnosis and stage of lung cancer: a prospective cohort study. *Br J Cancer*  
7 2015;112 Suppl 1:S6-13.  
8
- 9  
10 12. Neal RD, Din NU, Hamilton W, et al. Comparison of cancer diagnostic intervals before  
11 and after implementation of NICE guidelines: analysis of data from the UK General  
12 Practice Research Database. *Br J Cancer* 2014;110(3):584-92.  
13
- 14  
15 13. Barrett J, Hamilton W. Pathways to the diagnosis of lung cancer in the UK: a cohort  
16 study. *BMC Fam Pract* 2008;9:31.  
17
- 18  
19 14. Baughan P, O'Neill B, Fletcher E. Auditing the diagnosis of cancer in primary care: the  
20 experience in Scotland. *Br J Cancer* 2009;101 Suppl 2:S87-91.  
21
- 22  
23 15. Guldbrandt LM, Fenger-Gron M, Rasmussen TR, et al. The role of general practice in  
24 routes to diagnosis of lung cancer in Denmark: a population-based study of general  
25 practice involvement, diagnostic activity and diagnostic intervals. *BMC Health Serv Res*  
26 2015;15:21.  
27
- 28  
29 16. Topping ML, Frydenberg M, Hansen RP, et al. Evidence of increasing mortality with  
30 longer diagnostic intervals for five common cancers: a cohort study in primary care. *Eur*  
31 *J Cancer* 2013;49(9):2187-98.  
32
- 33  
34 17. Hansen RP, Vedsted P, Sokolowski I, et al. Time intervals from first symptom to  
35 treatment of cancer: a cohort study of 2,212 newly diagnosed cancer patients. *BMC*  
36 *Health Serv Res* 2011;11:284.  
37
- 38  
39 18. Bjerager M, Palshof T, Dahl R, et al. Delay in diagnosis of lung cancer in general  
40 practice. *Br J Gen Pract* 2006;56(532):863-8.  
41
- 42  
43 19. Rolke HB, Bakke PS, Gallefoss F. Delays in the diagnostic pathways for primary  
44 pulmonary carcinoma in Southern Norway. *Respir Med* 2007;101(6):1251-7.  
45
- 46  
47 20. Largey G, Ristevski E, Chambers H, et al. Lung cancer interval times from point of  
48 referral to the acute health sector to the start of first treatment. *Aust Health Rev* 2016.  
49
- 50  
51 21. Evans SM, Earnest A, Bower W, et al. Timeliness of lung cancer care in Victoria: a  
52 retrospective cohort study. *Med J Aust* 2016;204(2):75 e1-9.  
53
- 54  
55 22. Ellis PM, Vandermeer R. Delays in the diagnosis of lung cancer. *J Thorac Dis*  
56 2011;3(3):183-8.  
57  
58  
59  
60

- 1  
2  
3 23. Lo DS, Zeldin RA, Skrastins R, et al. Time to treat: a system redesign focusing on  
4 decreasing the time from suspicion of lung cancer to diagnosis. *J Thorac Oncol*  
5 2007;2(11):1001-6.  
6  
7
- 8 24. Helsper CW, van Erp NF, Peeters PHM, de Wit NJ. Time to diagnosis and treatment for  
9 cancer patients in the Netherlands: Room for improvement? *European Journal of*  
10 *Cancer* 2017; (87) 113-121  
11  
12
- 13 25. Butler J, Foot C, Bomb M, et al. The International Cancer Benchmarking Partnership:  
14 an international collaboration to inform cancer policy in Australia, Canada, Denmark,  
15 Norway, Sweden and the United Kingdom. *Health Policy* 2013;112(1-2):148-55.  
16  
17
- 18 26. Weller D, Vedsted P, Anandan C, et al. An investigation of routes to cancer diagnosis  
19 in 10 international jurisdictions, as part of the International Cancer Benchmarking  
20 Partnership: survey development and implementation. *BMJ Open* 2016;6(7):e009641.  
21  
22
- 23 27. Weller D, Vedsted P, Rubin G, et al. The Aarhus statement: improving design and  
24 reporting of studies on early cancer diagnosis. *Br J Cancer* 2012;106(7):1262-7.  
25  
26
- 27 28. Jenkinson C, Coulter A, Wright L. Short form 36 (SF36) health survey questionnaire:  
28 normative data for adults of working age. *Bmj*. 1993 May 29;306(6890):1437-40  
29  
30
- 31 29. TNM classification of malignant tumours / edited by L.H. Sobin, M.K. Gospodarowicz,  
32 and Ch. Wittekind. — 7th ed. UICC International Union Against Cancer. ISBN 978-1-  
33 4443-3241-4  
34  
35
- 36 30. Koenker R, Bassett G. Regression quantiles. *Econometrica* 1978; 46:33-50  
37  
38
- 39 31. Machado JAF, Santos Silva JMC. Quantiles for Counts. *J Amer Statistical Assoc* 2005,  
40 100(472): 1226-1237.  
41  
42
- 43 32. Miranda A. QCOUNT: Stata program to fit quantile regression models for count data.  
44 Boston: Boston College Department of Economics; 2006  
45  
46
- 47 33. Lin LI. A concordance correlation coefficient to evaluate reproducibility. *Biometrics*  
48 1989;45(1):255-68.  
49  
50
- 51 34. Coxon D. The Aarhus statement on cancer diagnostic research: turning  
52 recommendations into new survey instruments. *BMC Health Services Research*  
53 2018(18):677  
54
- 55 35. Walters S, Maringe C, Coleman MP, et al. Lung cancer survival and stage at diagnosis  
56 in Australia, Canada, Denmark, Norway, Sweden and the UK: a population-based  
57 study, 2004-2007. *Thorax* 2013;68(6):551-64.  
58  
59  
60

- 1  
2  
3 36. Nicholson BD, Mant D, Neal RD, et al. International variation in adherence to referral  
4 guidelines for suspected cancer: a secondary analysis of survey data. *Br J Gen Pract*  
5 2016;66(643):e106-13.  
6  
7 37. Shim J(1), Brindle L, Simon M, George S. A systematic review of symptomatic  
8 diagnosis of lung cancer. *Fam Pract*. 2014 Apr;31(2):137-48  
9  
10  
11 38. Hamilton W, Peters TJ, Round A, et al. What are the clinical features of lung cancer  
12 before the diagnosis is made? A population based case-control study. *Thorax*  
13 2005;60(12):1059-65.  
14  
15  
16 39. Beckett P, Tata LJ, Hubbard RB. Risk factors and survival outcome for non-elective  
17 referral in non-small cell lung cancer patients-analysis based on the National Lung  
18 Cancer Audit. *Lung Cancer* 2014;83(3):396-400.  
19  
20  
21 40. Lim A, Meshher D, Gentry-Maharaj A, et al. Time to diagnosis of Type I or II invasive  
22 epithelial ovarian cancers: a multicentre observational study using patient questionnaire  
23 and primary care records. *BJOG* 2016;123(6):1012-20.  
24  
25  
26 41. Neal RD, Allgar VL, Ali N, et al. Stage, survival and delays in lung, colorectal, prostate  
27 and ovarian cancer: comparison between diagnostic routes. *Br J Gen Pract*  
28 2007;57(536):212-9.  
29  
30  
31 42. Guldbrandt LM, Moller H, Jakobsen E, et al. General practice consultations, diagnostic  
32 investigations, and prescriptions in the year preceding a lung cancer diagnosis. *Cancer*  
33 *Med* 2017;6(1):79-88.  
34  
35  
36  
37 43. Danish National Board of Health. Pakkeforløb for lungekræft [Cancer Patient Pathway  
38 – Lung Cancer], 2016) National Board of Health, Copenhagen. Available at:  
39 [https://www.sst.dk/da/sygdom-og-](https://www.sst.dk/da/sygdom-og-behandling/kraeft/pakkeforloeb/~media/89192ECB2709401CAD8E4BBB0304691E.aspx)  
40 [behandling/kraeft/pakkeforloeb/~media/89192ECB2709401CAD8E4BBB0304691E.as](https://www.sst.dk/da/sygdom-og-behandling/kraeft/pakkeforloeb/~media/89192ECB2709401CAD8E4BBB0304691E.aspx)  
41 [hx](https://www.sst.dk/da/sygdom-og-behandling/kraeft/pakkeforloeb/~media/89192ECB2709401CAD8E4BBB0304691E.aspx) [accessed 25 September 2017]  
42  
43  
44  
45  
46 44. O'Rourke N, Edwards R. Lung cancer treatment waiting times and tumour growth. *Clin*  
47 *Oncol (R Coll Radiol)*. 2000;12(3):141-4.  
48  
49  
50  
51 45. Wang J, Mahasittiwat P, Wong KK, et al. Natural growth and disease progression of  
52 non-small cell lung cancer evaluated with 18F-fluorodeoxyglucose PET/CT. *Lung*  
53 *Cancer* 2012;78(1):51-6.  
54  
55  
56  
57 46. Jensen H, Tørring ML, Vedsted P. Prognostic consequences of implementing cancer  
58 patient pathways in Denmark: a comparative cohort study of symptomatic cancer  
59 patients in primary care. *BMC Cancer* 2017;17:627.  
60

- 1  
2  
3  
4  
5 47. Allemani C, Matsuda T, Di Carlo V, et al. Global surveillance of trends in cancer  
6 survival 2000–14 (CONCORD-3): analysis of individual records for 37 513 025 patients  
7 diagnosed with one of 18 cancers from 322 population-based registries in 71 countries.  
8 Lancet 2018 Mar 17;391(10125):1023-1075.  
9  
10  
11  
12  
13  
14  
15  
16  
17  
18  
19  
20  
21  
22  
23  
24  
25  
26  
27  
28  
29  
30  
31  
32  
33  
34  
35  
36  
37  
38  
39  
40  
41  
42  
43  
44  
45  
46  
47  
48  
49  
50  
51  
52  
53  
54  
55  
56  
57  
58  
59  
60

For peer review only

1  
2  
3  
4  
5  
6  
7  
8  
9  
10  
11  
12  
13  
14  
15  
16  
17  
18  
19  
20  
21  
22  
23  
24  
25  
26  
27  
28  
29  
30  
31  
32  
33  
34  
35  
36  
37  
38  
39  
40  
41  
42  
43  
44  
45  
46  
47  
48  
49  
50  
51  
52  
53  
54  
55  
56  
57  
58  
59  
60



Time intervals from onset of symptoms to start of treatment based on the Aarhus Statement



Differences in 50th, 75th and 90th centiles of the intervals (days) between Wales as the reference and the other nine jurisdictions. The data are adjusted for differences in age, gender and comorbidity. The bars in black show significant differences in intervals.

420x297mm (300 x 300 DPI)

## Supplementary Web Appendix

### Contents

#### Appendix A. Lung cancer questionnaires

|                                                            |    |
|------------------------------------------------------------|----|
| A1: Patient questionnaire.....                             | 2  |
| A2: Primary care physician (PCP) questionnaire.....        | 16 |
| A3: Cancer treatment specialists (CTS) questionnaire ..... | 24 |

#### Appendix B . Rules for missing, incomplete, multiple response and out of range data.....32

#### Appendix C . Supplementary Tables

|                                                                                                                                                                        |    |
|------------------------------------------------------------------------------------------------------------------------------------------------------------------------|----|
| C1: Classification of lung cancer -specific symptoms reported by patients into cancer specific and non- cancer specific.....                                           | 39 |
| C2: Time intervals (days) depicted as median, 75th and 90th centiles for each of the ten jurisdictions. In Sweden, no data was available on primary care interval..... | 40 |
| C3. Data sources used to define dates and percentage of imputed dates.....                                                                                             | 41 |
| C4: Percentages of negative intervals set to 0, large intervals (>365 days) set to 365 days, and intervals based not on dates.....                                     | 42 |

## Appendix A: Lung cancer questionnaires

### A1: Patient questionnaire



# International Cancer Benchmarking Partnership Module 4

## Patient questionnaire Lung Cancer

Thank you very much for taking the time to fill in this questionnaire – it should take about 20 minutes to complete. We are sending the questionnaire to a large sample of people who we understand have had a diagnosis of lung cancer. If this has been sent to you in error and you do not have cancer, please do not continue and return the documents in the prepaid envelope.

Our aim is to gain a better understanding of the process by which people have their cancer diagnosed. We would also like to find out more about the symptoms they experience (if any), and the pathway they follow from start of symptoms to treatment of their cancer. This will help in identifying ways in which cancers can be diagnosed quickly and effectively. Thank you once again for your time.

**This information is confidential and will not be passed to anyone involved in your treatment.**

Name:

---

Date of Birth:

---

Address:

---

---

---

Copyright property of the International Benchmarking Partnership (ICBP) and Module 4 collaborators. Usage must be authorised



## Consent form

---

Please read the consent form and sign your name and date **BELOW**.

If you require any clarification, please do not hesitate to ring the study team members. Their contact details are found on the information sheet.

Please be reassured that your responses are completely confidential and will not be passed to anyone involved in your treatment. For the purposes of the study it is important that you agree to consent to all the statements listed below.

- I confirm that I have read the attached information sheet and I understand why the research is being done.
- I am willing for the team to request information from my GP and hospital doctors which is relevant to the audit as described in the information sheet.
- I give permission for my details (name, address) to be given to the cancer registry (NHS Information Centre for Health and Social Care) for follow up.
- I agree for the information I have provided and any other relevant information from my medical records to be stored as described in the information sheet under the custodianship of University College London.
- I consent to sharing of coded data which contains no personal identifiers between researchers, some of whom are located outside the European Union.
- I consent for use of my data if I become mentally incapacitated during the course of the project.

**I agree to all the statements listed and consent to participate in the study.**

Name (Please print)

---

Signature:

---

Date:

---

If we have any questions, may we phone you for clarification?

(Please tick)

Yes  No

If **Yes**, please provide your telephone number:

---

Copyright property of the International Benchmarking Partnership (ICBP) and Module 4 collaborators. Usage must be authorised



1  
2  
3  
4  
5  
6  
7 **1. Please can you confirm the details of your GP/GP practice (name, practice**  
8 **address – as best as you can remember): We appreciate that you may have**  
9 **more than one GP involved in your care – in which case, we are interested**  
10 **in the GP you would say provides the majority of your care, particularly**  
11 **relating to the cancer you’ve had diagnosed.**  
12  
13

14 Name of doctor

15 \_\_\_\_\_  
16  
17 Name of practice

18 \_\_\_\_\_  
19  
20 Address

21 \_\_\_\_\_  
22  
23  
24  
25  
26  
27  
28 Postcode

29 \_\_\_\_\_  
30  
31 Town

Sample

32  
33  
34  
35  
36  
37  
38  
39  
40  
41  
42  
43  
44  
45  
46  
47  
48  
49  
50  
51  
52  
53  
54 Copyright property of the International Benchmarking Partnership (ICBP)  
55 and Module 4 collaborators. Usage must be authorised  
56  
57  
58  
59  
60



2. Which of the following **best describes** the events which led to your diagnosis of cancer? (please tick only **ONE** answer)



|                                                                                                               |                                     |
|---------------------------------------------------------------------------------------------------------------|-------------------------------------|
| I had symptoms/I noticed a bodily change and went to see a doctor (e.g. GP)                                   | <input checked="" type="checkbox"/> |
| I had symptoms/I noticed a bodily change and went/was taken to Accident and Emergency (A&E)                   | <input type="checkbox"/>            |
| I had seen a doctor/GP with symptoms, but went/was taken to Accident and Emergency (A&E) when things worsened | <input type="checkbox"/>            |
| I was being investigated by my doctor(s) for another problem during which time the cancer was discovered      | <input type="checkbox"/>            |
| Other (please describe):<br><br><h1>Sample</h1>                                                               | <input type="checkbox"/>            |

Copyright property of the International Benchmarking Partnership (ICBP) and Module 4 collaborators. Usage must be authorised



3. The following health concerns or symptoms are commonly experienced with lung cancer.

|                                |
|--------------------------------|
| Cough                          |
| Breathlessness                 |
| Being short of breath          |
| Chest pain / Pain on breathing |
| Coughing up blood              |
| Bloody sputum/blood in spit    |
| Unexplained weight loss        |
| Loss of appetite               |
| Fatigue                        |

Please write down **ALL** health concern(s) or symptom(s) you may have had before contacting a doctor or taking part in screening. It does not matter if they are not included in the list above:

|                                                                       |
|-----------------------------------------------------------------------|
| Please write your health concern(s) or symptom(s) in the boxes below: |
| 1)                                                                    |
| 2)                                                                    |
| 3)                                                                    |
| 4)                                                                    |
| 5)                                                                    |
| 6)                                                                    |



|                                                                              |                          |
|------------------------------------------------------------------------------|--------------------------|
| This is not applicable to me (e.g. I did not have any symptoms), please tick | <input type="checkbox"/> |
|------------------------------------------------------------------------------|--------------------------|

Copyright property of the International Benchmarking Partnership (ICBP) and Module 4 collaborators. Usage must be authorised



- 1  
2  
3  
4  
5  
6  
7 **4. Please write down your best estimate of the date you noticed the first of**  
8 **these health concern(s) or symptom(s).** If you cannot remember the exact date,  
9 you can fill in the month and the year.

10  
11 Day (optional), month, year

|   |   |   |   |   |   |   |   |
|---|---|---|---|---|---|---|---|
| D | D | M | M | Y | Y | Y | Y |
|---|---|---|---|---|---|---|---|



12  
13  
14  
15  
16 This is not applicable to me (e.g. I had no symptoms), please tick

- 17  
18  
19  
20 **5. Approximately how long did you have health concern(s) or symptom(s)**  
21 **before contacting a doctor? (Please think of the first visit to the doctor, not**  
22 **re-visits after that).** Please tick only **ONE** answer.



|                     |  |
|---------------------|--|
| Less than 1 week    |  |
| 1-2 weeks           |  |
| 3-4 weeks           |  |
| 5-7 weeks           |  |
| 2-5 months          |  |
| 6-12 months         |  |
| More than 12 months |  |



23  
24  
25  
26  
27  
28  
29  
30  
31  
32  
33  
34  
35  
36  
37  
38  
39  
40 This is not applicable to me (e.g. I had no symptoms), please tick

41  
42  
43  
44  
45  
46  
47  
48  
49  
50  
51  
52  
53  
54 Copyright property of the International Benchmarking Partnership (ICBP)  
55 and Module 4 collaborators. Usage must be authorised



6a. Once you contacted a practice about your health concern(s) or symptom(s), how long did it take to get an appointment with a doctor? (Please think of the first visit to the doctor, to discuss your health concern(s) or symptom(s)). Please tick only **ONE** answer.



|                                                                                      |                          |
|--------------------------------------------------------------------------------------|--------------------------|
| Same day/next day                                                                    | <input type="checkbox"/> |
| Within 1 week                                                                        | <input type="checkbox"/> |
| 1-2 weeks                                                                            | <input type="checkbox"/> |
| 3-4 weeks                                                                            | <input type="checkbox"/> |
| Longer                                                                               | <input type="checkbox"/> |
| If there was no waiting time (e.g. you went/were taken to A&E), please tick this box | <input type="checkbox"/> |
| This is not applicable to me (e.g. I had no symptoms), please tick                   | <input type="checkbox"/> |

6b. What was the date you first saw your doctor about your health concern(s) or symptom(s)? If you cannot remember the exact date, you can fill in the month and the year.

Day (optional), month, year

|   |   |   |   |   |   |   |   |
|---|---|---|---|---|---|---|---|
| D | D | M | M | Y | Y | Y | Y |
|---|---|---|---|---|---|---|---|



|                                                                    |                          |
|--------------------------------------------------------------------|--------------------------|
| This is not applicable to me (e.g. I had no symptoms), please tick | <input type="checkbox"/> |
|--------------------------------------------------------------------|--------------------------|

Copyright property of the International Benchmarking Partnership (ICBP) and Module 4 collaborators. Usage must be authorised



7. How many times did you visit the following for the investigation of your symptoms before your cancer was diagnosed?

|                                             | Please write down the number of visits |
|---------------------------------------------|----------------------------------------|
| GP                                          |                                        |
| Hospital                                    |                                        |
| Consultant/specialist outside of a hospital |                                        |



|                                                                    |                          |
|--------------------------------------------------------------------|--------------------------|
| This is not applicable to me (e.g. I had no symptoms), please tick | <input type="checkbox"/> |
|--------------------------------------------------------------------|--------------------------|

8a. After your doctor referred you to a specialist, how long did it take you to get an appointment? Please tick only **ONE** answer.

|                     |                          |
|---------------------|--------------------------|
| Less than 1 week    | <input type="checkbox"/> |
| 1-2 weeks           | <input type="checkbox"/> |
| 3-4 weeks           | <input type="checkbox"/> |
| 5-7 weeks           | <input type="checkbox"/> |
| 2-5 months          | <input type="checkbox"/> |
| 6-12 months         | <input type="checkbox"/> |
| More than 12 months | <input type="checkbox"/> |



|                                                                             |                          |
|-----------------------------------------------------------------------------|--------------------------|
| This is not applicable to me (e.g. my doctor did not refer me), please tick | <input type="checkbox"/> |
|-----------------------------------------------------------------------------|--------------------------|



Copyright property of the International Benchmarking Partnership (ICBP) and Module 4 collaborators. Usage must be authorised



**8b. What was the date of your first appointment with a doctor, involved in investigating and/or treating your cancer, to whom you were referred?**

If you cannot remember the exact date, you can fill in the month and the year.

Day (optional), month, year

|   |   |   |   |   |   |   |   |
|---|---|---|---|---|---|---|---|
| D | D | M | M | Y | Y | Y | Y |
|---|---|---|---|---|---|---|---|



|                                                                             |                          |
|-----------------------------------------------------------------------------|--------------------------|
| This is not applicable to me (e.g. my doctor did not refer me), please tick | <input type="checkbox"/> |
|-----------------------------------------------------------------------------|--------------------------|

**9. What was the date you were told you had cancer?** If you cannot remember the exact date, you can fill in the month and the year.

Day (optional), month, year

|   |   |   |   |   |   |   |   |
|---|---|---|---|---|---|---|---|
| D | D | M | M | Y | Y | Y | Y |
|---|---|---|---|---|---|---|---|

Sample

Copyright property of the International Benchmarking Partnership (ICBP) and Module 4 collaborators. Usage must be authorised



**10. Have you had any of the following treatments for your cancer yet? If so, please can you estimate the date this treatment started? Please tick **ALL** that apply. If you cannot remember the exact date, you can fill in the month and the year.**

|    | Type of treatment         |                                                             | Date of treatment<br>(give first date if you had more than one) |
|----|---------------------------|-------------------------------------------------------------|-----------------------------------------------------------------|
| a. | Surgery                   | <input type="checkbox"/> Yes<br><input type="checkbox"/> No | Day (optional), month, year<br>D D M M Y Y Y Y                  |
| b. | Chemotherapy              | <input type="checkbox"/> Yes<br><input type="checkbox"/> No | Day (optional), month, year<br>D D M M Y Y Y Y                  |
| c. | Radiotherapy              | <input type="checkbox"/> Yes<br><input type="checkbox"/> No | Day (optional), month, year<br>D D M M Y Y Y Y                  |
| d. | Other<br>Please specify:  | <input type="checkbox"/> Yes<br><input type="checkbox"/> No | Day (optional), month, year<br>D D M M Y Y Y Y                  |
| e. | Treatment not started yet | <input type="checkbox"/> Yes                                |                                                                 |

Copyright property of the International Benchmarking Partnership (ICBP) and Module 4 collaborators. Usage must be authorised



**11. Who is the consultant doctor who has taken responsibility for diagnosing and or/treating your cancer?**

|                      |
|----------------------|
| Name of consultant:  |
| Hospital name:       |
| Hospital department: |

**Please can you answer some more general questions about your health?**

It will help us in interpreting your responses to this questionnaire to know about your general health and other health problems you may have had in the past.

**12. Looking back to the 2 years before you were diagnosed with cancer, would you say your general health was** (Please tick only **ONE** answer.):



|           |  |
|-----------|--|
| Very good |  |
| Good      |  |
| Fair      |  |
| Poor      |  |
| Very poor |  |

**13. Have you been treated before for any of the conditions below?**

Please tick 'yes' or 'no' for each condition:

|                                      |                                                          |
|--------------------------------------|----------------------------------------------------------|
| Heart disease                        | <input type="checkbox"/> Yes <input type="checkbox"/> No |
| Stroke                               | <input type="checkbox"/> Yes <input type="checkbox"/> No |
| Lung disease (excluding lung cancer) | <input type="checkbox"/> Yes <input type="checkbox"/> No |
| Diabetes                             | <input type="checkbox"/> Yes <input type="checkbox"/> No |

Copyright property of the International Benchmarking Partnership (ICBP) and Module 4 collaborators. Usage must be authorised



1  
2  
3  
4  
5  
6  
7 **Finally, a little more information about you.** The information you provide below  
8 will help us to analyse the results of the survey in more detail.  
9

10  
11 **14. Which of these best describes your ethnic group? (please tick one box, as**  
12 **appropriate).** If you are descended from more than one ethnic or racial group,  
13 please tick the group you consider you belong to, or tick 'any other ethnic group'.  
14

15 ✓ ✓ ✓ ✓

|                                         |                          |         |                          |                      |                          |                    |                          |
|-----------------------------------------|--------------------------|---------|--------------------------|----------------------|--------------------------|--------------------|--------------------------|
| White                                   | <input type="checkbox"/> | Chinese | <input type="checkbox"/> | Black -<br>Caribbean | <input type="checkbox"/> | Black -<br>African | <input type="checkbox"/> |
| Black - other                           | <input type="checkbox"/> | Indian  | <input type="checkbox"/> | Pakistani            | <input type="checkbox"/> | Bangladeshi        | <input type="checkbox"/> |
| Any other ethnic group, please specify: |                          |         |                          |                      |                          |                    | <input type="checkbox"/> |

16  
17  
18  
19  
20  
21  
22  
23  
24  
25  
26  
27  
28 **15. What is the main language spoken in your home? Please tick** ✓  
29

|                        |                          |
|------------------------|--------------------------|
| English                | <input type="checkbox"/> |
| Other, please specify: | <input type="checkbox"/> |

30  
31  
32  
33  
34  
35  
36 **16. What is the highest level of education you have achieved?** ✓  
37

38 Please tick only **ONE** answer.

|                                                      |                          |
|------------------------------------------------------|--------------------------|
| Finished school at or before the age of fifteen      | <input type="checkbox"/> |
| Completed GCSEs, O-levels or equivalent              | <input type="checkbox"/> |
| Completed A Levels or equivalent                     | <input type="checkbox"/> |
| Completed further education but not a degree         | <input type="checkbox"/> |
| Completed a Bachelor's degree / Masters degree / PhD | <input type="checkbox"/> |
| Other, please specify:                               | <input type="checkbox"/> |

51  
52  
53  
54 Copyright property of the International Benchmarking Partnership (ICBP)  
55 and Module 4 collaborators. Usage must be authorised  
56  
57  
58  
59  
60



1  
2  
3  
4  
5  
6  
7 **17. Have you ever smoked cigarettes, including hand-rolled ones,**  
8 **pipes or cigars?**

9  
10  Yes  No

11  
12  
13 **18. Are you a current smoker, smoking either cigarettes,**  
14 **including hand-rolled ones, pipes or cigars?**

15  
16  Yes  No

17  
18  
19  
20 **19. If you are a current smoker or have smoked in the past, how many**  
21 **cigarettes, including hand-rolled ones, pipes or cigars on average do you**  
22 **smoke/have you smoked per day?**

23  
24  
25 Number per day:

26  
27  
28  
29  
30  
31  
32  
33  
34  
35  
36  
37  
38  
39  
40  
41  
42  
43  
44  
45  
46  
47  
48  
49  
50  
51  
52  
53  
54  
55  
56  
57  
58  
59  
60

Sample

Copyright property of the International Benchmarking Partnership (ICBP)  
and Module 4 collaborators. Usage must be authorised



**20. Further comments**

**Please add anything else that you would like to tell us about your cancer diagnosis or treatment.**

Sample

**Thank you very much for taking the time to complete this questionnaire.**

Copyright property of the International Benchmarking Partnership (ICBP) and Module 4 collaborators. Usage must be authorised

## A2: Primary care physician (PCP) questionnaire



## International Cancer Benchmarking Partnership Module 4

### Primary Care Audit Lung Cancer

Thank you very much for agreeing to fill in this questionnaire. As part of an international study examining differences in cancer survival, we are sending the questionnaire to health care providers of a sample of consented patients with cancer.

Our aim is to gain a better understanding of the process by which people have their cancer diagnosed – the symptoms they experience, and the pathway they follow from onset of symptoms to treatment of their cancer. This will help in identifying ways in which cancers can be diagnosed and treated quickly and effectively. Thank you once again for your time.

**Please can you refer to your patient's notes in completing the questionnaire as this will help in obtaining accurate data on time points.**

.....  
If you would prefer to return this questionnaire without the patient details, please tear off along the dotted line

ID-number: Jurisdiction-ID + Patient-ID:  
\_\_\_\_\_

Copyright property of the International Benchmarking Partnership (ICBP) and Module 4 collaborators. Usage must be authorised

1  
2  
3  
4  
5  
6  
7  
8  
9  
10  
11  
12  
13  
14  
15  
16  
17  
18  
19  
20  
21  
22  
23  
24  
25  
26  
27  
28  
29  
30  
31  
32  
33  
34  
35  
36  
37  
38  
39  
40  
41  
42  
43  
44  
45  
46  
47  
48  
49  
50  
51  
52  
53  
54  
55  
56  
57  
58  
59  
60



# Sample

.....  
**Patient information**

ID-number: Jurisdiction-ID + Patient-ID:

---

Full name:

---

Address:

---

---

---

Postcode:

Date of birth:

|   |   |   |   |   |   |   |   |
|---|---|---|---|---|---|---|---|
| D | D | M | M | Y | Y | Y | Y |
|---|---|---|---|---|---|---|---|

Copyright property of the International Benchmarking Partnership (ICBP) and Module 4 collaborators. Usage must be authorised



**1. Duration of symptoms**

Please estimate how long your patient had symptom(s), attributable to lung cancer, before attending your practice (or other health service).

We appreciate that identifying a 'date of first symptom' is not always straightforward – particularly when there are multiple and/or chronic symptoms. Nevertheless, we hope you can provide a 'best estimate'.



| Estimate of symptom duration<br>(please tick <b>one</b> ): |  | What were the symptoms?<br>Please describe: |
|------------------------------------------------------------|--|---------------------------------------------|
| Less than 1 week                                           |  |                                             |
| 1 to 4 weeks                                               |  |                                             |
| 5 to 7 weeks                                               |  |                                             |
| 2-5 months                                                 |  |                                             |
| 6-12 months                                                |  |                                             |
| More than 12 months                                        |  |                                             |
| Not possible to estimate                                   |  |                                             |
| No symptoms<br>(e.g. screen detected cancers)              |  |                                             |

Copyright property of the International Benchmarking Partnership (ICBP) and Module 4 collaborators. Usage must be authorised



## 2. Pathway of presentation

### 2.1 Through what route did the patient first present? Please tick **ONE**:

✓

|                                                                                                                                            |   |                                                                                                                                                                                                                                                                                                                            |
|--------------------------------------------------------------------------------------------------------------------------------------------|---|----------------------------------------------------------------------------------------------------------------------------------------------------------------------------------------------------------------------------------------------------------------------------------------------------------------------------|
| Your patient first presented to primary care (either in-hours or out-of-hours)                                                             | ✓ | Please can you provide your best approximation of the date of this <b>primary care</b> visit<br><div style="border: 1px solid black; padding: 2px; display: flex; justify-content: space-around;"> <span>D</span><span>D</span><span>M</span><span>M</span><span>Y</span><span>Y</span><span>Y</span><span>Y</span> </div> |
| Your patient presented straight to A&E (with or without your involvement)                                                                  |   |                                                                                                                                                                                                                                                                                                                            |
| Your patient first presented to primary care, but then at a later date presented to A&E as an emergency (with or without your involvement) |   | Please can you provide your best approximation of the date of this <b>primary care</b> visit<br><div style="border: 1px solid black; padding: 2px; display: flex; justify-content: space-around;"> <span>D</span><span>D</span><span>M</span><span>M</span><span>Y</span><span>Y</span><span>Y</span><span>Y</span> </div> |
| Other – please describe:                                                                                                                   |   |                                                                                                                                                                                                                                                                                                                            |

Copyright property of the International Benchmarking Partnership (ICBP) and Module 4 collaborators. Usage must be authorised



**3. Date you ordered any tests/investigations in response to symptom(s).**

We are interested in any kind of tests/investigations (e.g. imaging etc) that you may have ordered. Please only consider the tests/investigations that you ordered yourself. Please tick **all** that apply and put in the date that the test/investigation was ordered:



|                         |  |                 |
|-------------------------|--|-----------------|
| Chest x-ray             |  | D D M M Y Y Y Y |
| MRI scan                |  | D D M M Y Y Y Y |
| CT scan                 |  | D D M M Y Y Y Y |
| PET scan                |  | D D M M Y Y Y Y |
| Sputum test             |  | D D M M Y Y Y Y |
| Lung biopsy             |  | D D M M Y Y Y Y |
| Bronchoscopy            |  | D D M M Y Y Y Y |
| Other (please specify): |  | D D M M Y Y Y Y |

**4. Date of referral to specialist medical services**

At what date did you **first** refer the patient to hospital or another specialist transferring the responsibility for on-going investigation/treatment to other medical services?

|   |   |   |   |   |   |   |   |
|---|---|---|---|---|---|---|---|
| D | D | M | M | Y | Y | Y | Y |
|---|---|---|---|---|---|---|---|

Copyright property of the International Benchmarking Partnership (ICBP) and Module 4 collaborators. Usage must be authorised



## 5. Nature of this referral

### 5.1 Do you know the date that the patient was seen for this referral?

Yes, please provide the date: 

|   |   |   |   |   |   |   |   |
|---|---|---|---|---|---|---|---|
| D | D | M | M | Y | Y | Y | Y |
|---|---|---|---|---|---|---|---|

No

### 5.2 If you did make a referral to specialist services, which of the following best describes the nature/characteristics of this referral? Please tick **one**.

|                                                                                                                              |   |
|------------------------------------------------------------------------------------------------------------------------------|---|
| Emergency admission: a referral to A&E (or equivalent) for immediate admission                                               | ✓ |
| An urgent referral for assessment of cancer symptoms/signs/test results (Note this will be within 2 weeks for England/Wales) |   |
| A less urgent referral in which cancer is raised as a possibility (Note this will be greater than 2 weeks for England/Wales) |   |
| A more general referral for investigation and assessment without cancer mentioned                                            |   |
| No referral was made                                                                                                         |   |
| Other – please describe                                                                                                      |   |

### 5.3 Would you say this patient's diagnostic pathway was conducted predominantly in the public or private system? Please tick **one**.

|                           |   |
|---------------------------|---|
| Public healthcare system  | ✓ |
| Private healthcare system |   |

Copyright property of the International Benchmarking Partnership (ICBP) and Module 4 collaborators. Usage must be authorised



6. Date of lung cancer diagnosis

This can be decided in different ways. Please tick **all** that apply.  
Please provide whichever of the following dates you have to hand:



|                                                                                  |                                     |                                                                                                                         |   |   |   |   |   |   |   |   |
|----------------------------------------------------------------------------------|-------------------------------------|-------------------------------------------------------------------------------------------------------------------------|---|---|---|---|---|---|---|---|
| Date of histological confirmation [ideal]                                        | <input checked="" type="checkbox"/> | <table border="1"> <tr> <td>D</td><td>D</td><td>M</td><td>M</td><td>Y</td><td>Y</td><td>Y</td><td>Y</td> </tr> </table> | D | D | M | M | Y | Y | Y | Y |
| D                                                                                | D                                   | M                                                                                                                       | M | Y | Y | Y | Y |   |   |   |
| Date results of investigation (histological or other) confirming cancer received | <input type="checkbox"/>            | <table border="1"> <tr> <td>D</td><td>D</td><td>M</td><td>M</td><td>Y</td><td>Y</td><td>Y</td><td>Y</td> </tr> </table> | D | D | M | M | Y | Y | Y | Y |
| D                                                                                | D                                   | M                                                                                                                       | M | Y | Y | Y | Y |   |   |   |
| Date patient was told                                                            | <input type="checkbox"/>            | <table border="1"> <tr> <td>D</td><td>D</td><td>M</td><td>M</td><td>Y</td><td>Y</td><td>Y</td><td>Y</td> </tr> </table> | D | D | M | M | Y | Y | Y | Y |
| D                                                                                | D                                   | M                                                                                                                       | M | Y | Y | Y | Y |   |   |   |
| Date biopsy undertaken                                                           | <input type="checkbox"/>            | <table border="1"> <tr> <td>D</td><td>D</td><td>M</td><td>M</td><td>Y</td><td>Y</td><td>Y</td><td>Y</td> </tr> </table> | D | D | M | M | Y | Y | Y | Y |
| D                                                                                | D                                   | M                                                                                                                       | M | Y | Y | Y | Y |   |   |   |
| Date patient was first admitted to hospital because of the malignancy            | <input type="checkbox"/>            | <table border="1"> <tr> <td>D</td><td>D</td><td>M</td><td>M</td><td>Y</td><td>Y</td><td>Y</td><td>Y</td> </tr> </table> | D | D | M | M | Y | Y | Y | Y |
| D                                                                                | D                                   | M                                                                                                                       | M | Y | Y | Y | Y |   |   |   |
| Other (please specify)                                                           | <input type="checkbox"/>            | <table border="1"> <tr> <td>D</td><td>D</td><td>M</td><td>M</td><td>Y</td><td>Y</td><td>Y</td><td>Y</td> </tr> </table> | D | D | M | M | Y | Y | Y | Y |
| D                                                                                | D                                   | M                                                                                                                       | M | Y | Y | Y | Y |   |   |   |

Copyright property of the International Benchmarking Partnership (ICBP) and Module 4 collaborators. Usage must be authorised



## 7. Additional information

Finally, we are interested to know what other conditions your patient has, and the severity/impact of these conditions

Have you and/or any of your partners treated this patient (or has the patient been to hospital) for any of the following conditions? Please tick **all** that apply:

|                                   |                                                          |
|-----------------------------------|----------------------------------------------------------|
| Cardiovascular disease            | <input type="checkbox"/> Yes <input type="checkbox"/> No |
| Stroke                            | <input type="checkbox"/> Yes <input type="checkbox"/> No |
| Lung disease (except lung cancer) | <input type="checkbox"/> Yes <input type="checkbox"/> No |
| Diabetes                          | <input type="checkbox"/> Yes <input type="checkbox"/> No |

Are there any other comments you would like to make about this patient?

Sample

Name (and title):

---

Signature:

---

Date:

---

**Thank you very much for taking the time to complete this questionnaire.**

Copyright property of the International Benchmarking Partnership (ICBP) and Module 4 collaborators. Usage must be authorised

A3: Cancer treatment specialists (CTS) questionnaire



# International Cancer Benchmarking Partnership Module 4

## Specialist Care Audit

### Lung Cancer

Thank you very much for agreeing to fill in this questionnaire – it should take about 10 minutes to complete. As part of an international study examining differences in cancer survival, we are sending the questionnaire to health care providers of a sample of patients with cancer.

Our aim is to gain a better understanding of the process by which people have their cancer diagnosed – the symptoms they experience, and the pathway they follow from onset of symptoms to treatment of their cancer. We hope you can help us with information on this patient’s cancer journey **once they were referred to specialist cancer services**. This will help in identifying ways in which cancers can be diagnosed and treated quickly and effectively.

**Thank you once again for your time**

**Please can you refer to your patient’s notes in completing the questionnaire, as this will help in obtaining accurate data on time points.**

.....

If you would prefer to return this questionnaire without the patient details, please tear off along the dotted line.

Your patient

---

is participating in the study.

Copyright property of the International Benchmarking Partnership (ICBP) and Module 4 collaborators. Usage must be authorised

1  
2  
3  
4  
5  
6  
7  
8  
9  
10  
11  
12  
13  
14  
15  
16  
17  
18  
19  
20  
21  
22  
23  
24  
25  
26  
27  
28  
29  
30  
31  
32  
33  
34  
35  
36  
37  
38  
39  
40  
41  
42  
43  
44  
45  
46  
47  
48  
49  
50  
51  
52  
53  
54  
55  
56  
57  
58  
59  
60



# Sample

.....  
**Patient information**

ID-number: Jurisdiction-ID + Patient-ID:

Full name:

Address:

Postcode:

Date of birth:

|   |   |   |   |   |   |   |   |
|---|---|---|---|---|---|---|---|
| D | D | M | M | Y | Y | Y | Y |
|---|---|---|---|---|---|---|---|

Copyright property of the International Benchmarking Partnership (ICBP) and Module 4 collaborators. Usage must be authorised



**1. Date patient first attended hospital/specialist services related to their cancer diagnosis.** We appreciate this date can at times be difficult to identify, particularly when there have been multiple visits in the lead up to a definitive diagnosis. Put another way, it's the date that the hospital/specialist service **assumed responsibility for on-going investigation/treatment** for your patient.

Day (optional), month, year

|   |   |   |   |   |   |   |   |
|---|---|---|---|---|---|---|---|
| D | D | M | M | Y | Y | Y | Y |
|---|---|---|---|---|---|---|---|

**2. How was the patient referred to the hospital/specialist services related to their cancer diagnosis?** Please tick.

Was it through a:

|                                        |   |                                  |   |
|----------------------------------------|---|----------------------------------|---|
| GP referral                            | ✓ | Referral from respiratory clinic | ✓ |
| Medical specialist/Consultant referral |   | Other referral – please specify: |   |

**3. Where did this first contact/appointment happen?** Please tick.

Which of the following best describes where this first contact/appointment took place?

|                                        |   |                                                                 |   |
|----------------------------------------|---|-----------------------------------------------------------------|---|
| Emergency department ('A&E')           | ✓ | Medical outpatient department, please specify which department  | ✓ |
| Oncology general outpatient department |   | Surgical outpatient department, please specify which department |   |
| Other – please specify:                |   |                                                                 |   |

Copyright property of the International Benchmarking Partnership (ICBP) and Module 4 collaborators. Usage must be authorised



#### 4. Date of diagnosis

This can be decided in different ways.

Please tick and complete as many of the following dates as possible.

|                                                                       |  |                                                                                                                                                                                                                                                                                        |
|-----------------------------------------------------------------------|--|----------------------------------------------------------------------------------------------------------------------------------------------------------------------------------------------------------------------------------------------------------------------------------------|
| Date of histological confirmation (ideal)                             |  | Day (optional), month, year<br><input type="text" value="D"/> <input type="text" value="D"/> <input type="text" value="M"/> <input type="text" value="M"/> <input type="text" value="Y"/> <input type="text" value="Y"/> <input type="text" value="Y"/> <input type="text" value="Y"/> |
| Date results of investigation confirming cancer received              |  | Day (optional), month, year<br><input type="text" value="D"/> <input type="text" value="D"/> <input type="text" value="M"/> <input type="text" value="M"/> <input type="text" value="Y"/> <input type="text" value="Y"/> <input type="text" value="Y"/> <input type="text" value="Y"/> |
| Date patient was told                                                 |  | Day (optional), month, year<br><input type="text" value="D"/> <input type="text" value="D"/> <input type="text" value="M"/> <input type="text" value="M"/> <input type="text" value="Y"/> <input type="text" value="Y"/> <input type="text" value="Y"/> <input type="text" value="Y"/> |
| Date of biopsy                                                        |  | Day (optional), month, year<br><input type="text" value="D"/> <input type="text" value="D"/> <input type="text" value="M"/> <input type="text" value="M"/> <input type="text" value="Y"/> <input type="text" value="Y"/> <input type="text" value="Y"/> <input type="text" value="Y"/> |
| Date patient was first admitted to hospital because of the malignancy |  | Day (optional), month, year<br><input type="text" value="D"/> <input type="text" value="D"/> <input type="text" value="M"/> <input type="text" value="M"/> <input type="text" value="Y"/> <input type="text" value="Y"/> <input type="text" value="Y"/> <input type="text" value="Y"/> |
| Date of MDT confirmation of diagnosis                                 |  | Day (optional), month, year<br><input type="text" value="D"/> <input type="text" value="D"/> <input type="text" value="M"/> <input type="text" value="M"/> <input type="text" value="Y"/> <input type="text" value="Y"/> <input type="text" value="Y"/> <input type="text" value="Y"/> |
| Other (please specify):                                               |  | Day (optional), month, year<br><input type="text" value="D"/> <input type="text" value="D"/> <input type="text" value="M"/> <input type="text" value="M"/> <input type="text" value="Y"/> <input type="text" value="Y"/> <input type="text" value="Y"/> <input type="text" value="Y"/> |

Copyright property of the International Benchmarking Partnership (ICBP) and Module 4 collaborators. Usage must be authorised



**5. Date treatment for the cancer commenced**

Based on your records, when would you say that any treatment specifically targeting the patient’s cancer started?

Day (optional), month, year

|   |   |   |   |   |   |   |   |
|---|---|---|---|---|---|---|---|
| D | D | M | M | Y | Y | Y | Y |
|---|---|---|---|---|---|---|---|

**6. Additional information**

Please can you provide any further information on the patient’s cancer:

| TNM, please tick as appropriate: |  |
|----------------------------------|--|
| 0                                |  |
| I                                |  |
| IIA                              |  |
| IIB                              |  |
| IIC                              |  |
| IIIA                             |  |
| IIIB                             |  |
| IIIC                             |  |
| IV                               |  |
| Not able to stage                |  |

Sample

Copyright property of the International Benchmarking Partnership (ICBP) and Module 4 collaborators. Usage must be authorised

1  
2  
3  
4  
5  
6  
7  
8  
9  
10  
11  
12  
13  
14  
15  
16  
17  
18  
19  
20  
21  
22  
23  
24  
25  
26  
27  
28  
29  
30  
31  
32  
33  
34  
35  
36  
37  
38  
39  
40  
41  
42  
43  
44  
45  
46  
47  
48  
49  
50  
51  
52  
53  
54  
55  
56  
57  
58  
59  
60



**6.1 Histological subtype:**



|                         |  |
|-------------------------|--|
| Squamous cell carcinoma |  |
| Adenocarcinoma          |  |
| Large cell carcinoma    |  |
| Non-small carcinoma     |  |
| Small cell carcinoma    |  |
| Carcinoid               |  |
| Unclassified            |  |
| Other (please specify): |  |

Sample

Copyright property of the International Benchmarking Partnership (ICBP) and Module 4 collaborators. Usage must be authorised

1  
2  
3  
4  
5  
6  
7  
8  
9  
10  
11  
12  
13  
14  
15  
16  
17  
18  
19  
20  
21  
22  
23  
24  
25  
26  
27  
28  
29  
30  
31  
32  
33  
34  
35  
36  
37  
38  
39  
40  
41  
42  
43  
44  
45  
46  
47  
48  
49  
50  
51  
52  
53  
54  
55  
56  
57  
58  
59  
60



### Further comments



Copyright property of the International Benchmarking Partnership (ICBP) and Module 4 collaborators. Usage must be authorised



Name (and title):

Signature:

Date:

Are you a ... (please tick below):

Sample



|                           |                                     |
|---------------------------|-------------------------------------|
| Surgeon                   | <input checked="" type="checkbox"/> |
| Medical Oncologist        | <input type="checkbox"/>            |
| Clinical Oncologist       | <input type="checkbox"/>            |
| Clinical Nurse Specialist | <input type="checkbox"/>            |
| Other (please specify):   | <input type="checkbox"/>            |

**Thank you very much for taking the time to complete this questionnaire.**

Copyright property of the International Benchmarking Partnership (ICBP) and Module 4 collaborators. Usage must be authorised

1 **Appendix B:**

2

3 **Rules for missing, incomplete, multiple response and out of range data**

4

|    |    |                                                                                                                                                                         |
|----|----|-------------------------------------------------------------------------------------------------------------------------------------------------------------------------|
| 5  | 6  | 1. <u>Oversampling</u>                                                                                                                                                  |
| 7  | 8  | To handle oversampling in Ontario, include only the first 315 consecutive lung cancer patients;                                                                         |
| 9  | 10 |                                                                                                                                                                         |
| 11 | 12 | 2. <u>Language/Participation in study/Presence of cancer</u>                                                                                                            |
| 13 | 14 | Exclude patients who checked “No, I don’t understand the language” or “I don’t want to participate in this study” or “I don’t have cancer”.                             |
| 15 | 16 |                                                                                                                                                                         |
| 17 | 18 | 3. <u>Survey responders</u>                                                                                                                                             |
| 19 | 20 | a) Exclude Patient/PCP/Specialist survey from the analysis, if it was not written by Patient/PCP/Specialist (example: a medical oncologist completed a PCP survey);     |
| 21 | 22 | b) In the case of duplicates, include only the first survey (example: 2 specialists completed surveys for the same patient).                                            |
| 23 | 24 |                                                                                                                                                                         |
| 25 | 26 | 4. <u>Gender</u>                                                                                                                                                        |
| 27 | 28 | Exclude patients with unknown Gender.                                                                                                                                   |
| 29 | 30 |                                                                                                                                                                         |
| 31 | 32 | 5. <u>Age</u>                                                                                                                                                           |
| 33 | 34 | a) Exclude patients with unknown age;                                                                                                                                   |
| 35 | 36 | b) Exclude patients younger 40 years;                                                                                                                                   |
| 37 | 38 | c) Use registry data, if Age is reported by both patient and registry.                                                                                                  |
| 39 | 40 |                                                                                                                                                                         |
| 41 | 42 | 6. <u>No cancer or Previous cancer in the same organ</u>                                                                                                                |
| 43 | 44 | a) Exclude patients with no cancer based on registry data;                                                                                                              |
| 45 | 46 | b) Exclude patients with previous cancer in the same organ based on data from registry or free-text for Presentation in the patient survey.                             |
| 47 | 48 |                                                                                                                                                                         |
| 49 | 50 | 7. <u>Date of consent</u>                                                                                                                                               |
| 51 | 52 | Exclude patients with date of consent which is unknown, before 01.01.2013 or in the future.                                                                             |
| 53 | 54 |                                                                                                                                                                         |
| 55 | 56 | 8. <u>Multiple responses to Dates</u>                                                                                                                                   |
| 57 | 58 | If multiple responses were given to the dates (of first symptom; first presentation to primary care; referral; diagnosis; treatment start), then use the earliest date. |
| 59 | 60 |                                                                                                                                                                         |
|    |    | 9. <u>Order of Dates</u>                                                                                                                                                |
|    |    | The dates must be in the following order –                                                                                                                              |
|    |    | First symptom; first presentation to Primary Care; referral; diagnosis; treatment start.                                                                                |
|    |    | If not, check for mistakes.                                                                                                                                             |

|    |                                                                                                                                                 |
|----|-------------------------------------------------------------------------------------------------------------------------------------------------|
| 1  |                                                                                                                                                 |
| 2  |                                                                                                                                                 |
| 3  |                                                                                                                                                 |
| 4  | <b>10. <u>Date of first symptom</u></b>                                                                                                         |
| 5  | Date of first symptom is defined as date of first symptom from patient data.                                                                    |
| 6  |                                                                                                                                                 |
| 7  |                                                                                                                                                 |
| 8  | <b>11. <u>Date of first presentation</u></b>                                                                                                    |
| 9  | Date of first presentation to Primary Care is defined as (in the order of declining priority):                                                  |
| 10 | a) date of first presentation to Primary Care from PCP data;                                                                                    |
| 11 | b) date of first presentation to Primary Care and A&E from PCP data;                                                                            |
| 12 | c) date of first presentation to Primary Care from patient data.                                                                                |
| 13 |                                                                                                                                                 |
| 14 |                                                                                                                                                 |
| 15 |                                                                                                                                                 |
| 16 | <b>12. <u>Date of referral</u></b>                                                                                                              |
| 17 | Date of referral is defined as date of referral from PCP data.                                                                                  |
| 18 |                                                                                                                                                 |
| 19 |                                                                                                                                                 |
| 20 |                                                                                                                                                 |
| 21 |                                                                                                                                                 |
| 22 |                                                                                                                                                 |
| 23 | <b>13. <u>Date of diagnosis</u></b>                                                                                                             |
| 24 | <i>Definition</i>                                                                                                                               |
| 25 | a) If Registry reports both date of histological confirmation and date of confirming investigation, then use date of histological confirmation. |
| 26 | b) Date of diagnosis (based on patient data, PCP data, specialist data, registry data) is defined as                                            |
| 27 | (in the order of declining priority):                                                                                                           |
| 28 | - date of diagnosis from registry;                                                                                                              |
| 29 | - date of histological confirmation (from specialist data, PCP data);                                                                           |
| 30 | - date of biopsy (from specialist data, PCP data);                                                                                              |
| 31 | - date of confirming investigation (from specialist data, PCP data);                                                                            |
| 32 | - date of first hospital admission (from specialist data, PCP data);                                                                            |
| 33 | - date of MDT confirmation (from specialist data, PCP data);                                                                                    |
| 34 | - date patient was told (from specialist data, PCP data);                                                                                       |
| 35 | - other date of diagnosis (from specialist data, PCP data, patient data);                                                                       |
| 36 |                                                                                                                                                 |
| 37 |                                                                                                                                                 |
| 38 |                                                                                                                                                 |
| 39 |                                                                                                                                                 |
| 40 |                                                                                                                                                 |
| 41 | Choose a Date from a lower level of hierarchy, if the Date from a higher level is after the Date of                                             |
| 42 | consent or more than 9 months (=271 days) before the Date of consent.                                                                           |
| 43 |                                                                                                                                                 |
| 44 |                                                                                                                                                 |
| 45 |                                                                                                                                                 |
| 46 |                                                                                                                                                 |
| 47 | <i>Exclusion criteria</i>                                                                                                                       |
| 48 |                                                                                                                                                 |
| 49 |                                                                                                                                                 |
| 50 | a) Unknown date of diagnosis;                                                                                                                   |
| 51 | b) Date of diagnosis is after the date of consent;                                                                                              |
| 52 | c) Date of diagnosis is more than 9 months before the Date of consent.                                                                          |
| 53 |                                                                                                                                                 |
| 54 |                                                                                                                                                 |
| 55 |                                                                                                                                                 |
| 56 | <b>14. <u>Date of treatment start</u></b>                                                                                                       |
| 57 | a) Date of treatment start from patient data is defined as the earliest of the treatment dates for                                              |
| 58 | Surgery, Chemo, Radio and Other ( <u>e.g. palliative care, participation in a clinical trial, targeted</u>                                      |
| 59 | <u>agents like erlotinib and procedures like plueral tap</u> )                                                                                  |
| 60 |                                                                                                                                                 |

- b) Date of treatment start (based on registry data, specialist data, patient data) is defined as (in the order of declining priority):
- date of treatment start from registry data,
  - date of treatment start from specialist data,
  - date of treatment start from patient data,
  - anticipated date of treatment from patient data.

15. Imputation of missing day in the date

Imputation rules for missing day (given month and year are known):

- a) Set missing day to '16';
- b) Consider adjacent dates in a backwards order (from "Treatment" to "First symptom"). For each pair of such adjacent dates: If dates are not in a logical order (e.g. "Treatment" is before "Diagnosis"), but month and year are the same in both dates, and the day was imputed to '16' in one of the dates:
- Recode the day imputed earlier to '16' to the day from the adjacent date.

16. Considering time

If patient gave multiple answers to the "How long did you have symptoms before contacting a doctor?" question, then use the option with the shortest time interval.

17. Delay arranging appointment

If patient gave multiple answers to the "How long did it take to get an appointment with PCP?" question, then use the option with the shortest time interval.

18. Duration of symptoms

If PCP gave multiple answers to the "Duration of symptoms" question, then use the option with the shortest time interval.

19. Definition of Presentation

A. *Define Presentation within a Data Source*

1. Review the free-text for Presentation (Patient, PCP sources) and re-code, if possible.
2. If PCP reports 'Other' as Presentation and at least one symptom (or "Duration of Symptoms") or if Patient reports 'Other' as Presentation and at least one symptom (or date of first symptom or "Consider waiting time" or "Delay arranging appointment"), then re-code the Presentation in the corresponding data source to 'Unknown'- option.
3. In the case of multiple Presentation responses (Patient, PCP sources) - use a single option (in the order of declining priority):
  - a) 'VisitPCP and AE',
  - b) 'VisitPCP', 'AE' (if both 'VisitPCP' and 'AE' are given, then re-code as 'VisitPCP and AE'),
  - c) 'Unknown',
  - d) 'Investigation for another problem',
  - e) 'Other'

1  
2  
3  
4  
5  
6  
7  
8  
9  
10  
11  
12  
13  
14  
15  
16  
17  
18  
19  
20  
21  
22  
23

**B. Define Presentation from Alternative Data**

If Presentation hasn't been reported in either of data sources, then define it 'Unknown',  
if PCP reports at least one symptom (or "Duration of symptoms"); or if Patient reports  
at least one symptom (or date of first symptom or "Consider waiting time" or "Delay arranging  
appointment");

**C. Define Presentation from Data Source Hierarchy**

1. In all jurisdictions, except Sweden – use Presentation data from (in the order of declining priority):
  - a) PCP data;
  - b) Patient data;
2. In Sweden – use Presentation data from Patient data.

24  
25  
26  
27  
28  
29  
30  
31  
32  
33

**20. Patient interval**

The Patient interval is defined as (in the order of declining priority):

- a) "Date of first presentation to Primary Care" (rule 11) minus "Date of first symptom" (rule 10);
- b) If the interval in (a) is unknown or negative: Calculate the interval as the low boundary of "Considering time" (rule 16) plus the low boundary of "Delay arranging appointment" (rule 17);
- c) If the interval in (a) is unknown or negative and the interval in (b) is unknown: Calculate the interval as the low boundary of "Duration of symptoms interval" (rule 18).

34  
35  
36  
37  
38  
39

**21. Primary Care interval**

The Primary Care interval is defined as "Date of referral" (rule 12) minus "Date of first presentation to Primary Care" (rule 11).

40  
41  
42  
43  
44  
45

**22. Diagnostic interval**

- a) The Diagnostic interval is defined as "Date of diagnosis" (rule 13) minus "Date of first presentation to Primary Care" (rule 11).

46  
47  
48  
49  
50  
51

**23. Treatment interval**

The Treatment interval is defined as "Date of treatment start" (rule 14) minus "Date of diagnosis" (rule 13).

52  
53  
54  
55  
56

**24. Total interval**

- a) The Total interval is defined as "Date of treatment start" (rule 14) minus "Date of first symptom" (rule 10).

57  
58  
59  
60

**25. Range of Time intervals**

The time intervals (Patient, Primary Care, Diagnosis, Treatment, Total) must be in range 0-1 year.

If > 1 year: set the interval to 365 days

|    |                                                                                                    |
|----|----------------------------------------------------------------------------------------------------|
| 1  | If negative: set the interval to 0.                                                                |
| 2  |                                                                                                    |
| 3  |                                                                                                    |
| 4  | <b>26. <u>Number of visits</u></b>                                                                 |
| 5  | If patient gave multiple answers to the “Number of visits” questions, then use the option with a   |
| 6  | fewer number of visits.                                                                            |
| 7  |                                                                                                    |
| 8  |                                                                                                    |
| 9  |                                                                                                    |
| 10 |                                                                                                    |
| 11 | <b>27. <u>Specialist waiting time interval</u></b>                                                 |
| 12 | If patient gave multiple answers to the ““How long did it take to get an appointment with          |
| 13 | specialist?” question, then use the option with the shortest time interval.                        |
| 14 |                                                                                                    |
| 15 |                                                                                                    |
| 16 |                                                                                                    |
| 17 | <b>28. <u>Type of treatment</u></b>                                                                |
| 18 | If patient ticked both “Yes” and “No” as answers to the “Type of treatment (Surgery,               |
| 19 | Chemotherapy, Radiotherapy)” questions, then choose “Yes” answer.                                  |
| 20 |                                                                                                    |
| 21 |                                                                                                    |
| 22 |                                                                                                    |
| 23 | <b>29. <u>Health state</u></b>                                                                     |
| 24 | If patient gave multiple answers to the “Health state” question, then use the option with a better |
| 25 | health condition.                                                                                  |
| 26 |                                                                                                    |
| 27 |                                                                                                    |
| 28 |                                                                                                    |
| 29 | <b>30. <u>Comorbidity</u></b>                                                                      |
| 30 | a) If patient ticked both “Yes” and “No” as answers to the “Comorbidity (Heart disease, Stroke,    |
| 31 | Lung disease, Diabetes)” questions, then choose “Yes” answer;                                      |
| 32 | b) If both patient and PCP report “Comorbidity”, then use the PCP Data.                            |
| 33 |                                                                                                    |
| 34 |                                                                                                    |
| 35 | <b>31. <u>Ethnicity</u></b>                                                                        |
| 36 | a) If patient didn’t report “Ethnicity”, then use the information from (in the order of declining  |
| 37 | priority):                                                                                         |
| 38 | - “Ethnicity_Other_Details”;                                                                       |
| 39 | - “Other main language spoken at home”;                                                            |
| 40 | - “The main language spoken at home” (only for Victoria);                                          |
| 41 | - “The main language spoken at home is the chief one for this jurisdiction”=“Yes” given            |
| 42 | “Main language spoken at home is other than the main one for this jurisdiction”=“No”;              |
| 43 |                                                                                                    |
| 44 |                                                                                                    |
| 45 |                                                                                                    |
| 46 | b) Consider Ethnicity as unknown, if answers to the “Ethnicity” question are multiple and belong   |
| 47 | to                                                                                                 |
| 48 | different categories ( ‘white’, ‘Asian’, ‘black’, ‘other’).                                        |
| 49 |                                                                                                    |
| 50 |                                                                                                    |
| 51 |                                                                                                    |
| 52 | <b>32. <u>Education</u></b>                                                                        |
| 53 | If patient gave multiple answers to the “Education” question, then use the option with a higher    |
| 54 | level of education.                                                                                |
| 55 |                                                                                                    |
| 56 |                                                                                                    |
| 57 |                                                                                                    |
| 58 | <b>33. <u>Smoking Current</u></b>                                                                  |
| 59 | a) If patient ticked both “Yes” and “No” as answers to the “Smoking Current” question, then use    |
| 60 | “Yes” answer;                                                                                      |
|    | b) If patient hasn’t ticked neither “Yes” nor “No, then consider this case as Unknown.             |

1  
2  
3  
4  
5  
6  
7  
8  
9  
10  
11  
12  
13  
14  
15  
16  
17  
18  
19  
20  
21  
22  
23  
24  
25  
26  
27  
28  
29  
30  
31  
32  
33  
34  
35  
36  
37  
38  
39  
40  
41  
42  
43  
44  
45  
46  
47  
48  
49  
50  
51  
52  
53  
54  
55  
56  
57  
58  
59  
60

#### 34. Smoking Number

If patient reports "SmokingNumber" as text, then re-code using following rules:

- a) Where there is a number smoked /day – accept number;
- b) Where a range has been given – take the upper value;
- c) Where patient has put 10+ or 20+ - capture this as 11 or 21;
- d) Where number of cigarettes smoked in the past and currently being smoked are provided - average the numbers;
- e) Non entries code as "." ;
- f) Non-smokers (eg, "nil", "N/A") are coded as "0".

#### 35. Smoked ever

- a) If patient ticked both "Yes" and "No" as answers to the "Smoking ever" question, then use "Yes" answer;
- b) If patient hasn't ticked neither "Yes" nor "No": consider it as "Yes", if patient is a current smoker ("Smoking\_Current="Yes") or has specified a number of cigarettes ("SmokingNumber">0). Otherwise consider this case as Unknown.
- c) If patient has ticked "No": recode it to "Yes", if patient is a current smoker ("Smoking\_Current="Yes").

#### 36. Nature of referral

- a) Review free-text for "Nature of referral" (PCP Data) and re-code, if possible;
- b) In the case of multiple responses, use a single option as (in the order of declining priority):
  - "Referral for immediate admission";
  - "Urgent referral";
  - "Less urgent referral";
  - "General referral" ;
  - "No referral";
  - "Other".

#### 37. Refer Public or Private

- a) If PCP ticked both "Public" and "Private" as answers to the "Refer Public or Private" question, then use "Private" answer;
- b) If PCP hasn't ticked neither "Public" nor "Private", then consider this case as Unknown.

#### 38. Type of referral

If specialist gave multiple responses to the "How was the patient referred..." question, then use a single option (in the order of declining priority):

- "Respiratory clinic";
- "Specialist/consultant";
- "PCP";
- "Other".

1  
2  
3  
4  
5  
6  
7  
8  
9

39. First Attendance Place

If specialist gave multiple responses to the “First Attendance Place” question, then consider this case as Unknown.

10  
11  
12  
13  
14  
15  
16  
17  
18  
19  
20  
21  
22  
23  
24  
25  
26  
27  
28  
29  
30  
31  
32  
33  
34  
35  
36  
37  
38  
39  
40  
41  
42  
43  
44  
45  
46  
47  
48  
49  
50  
51  
52  
53  
54  
55  
56  
57  
58  
59  
60

40. Stage-TNM

- a) If specialist gave multiple responses to the “Stage\_TNM” question, then use the highest category;
- b) If registry gave multiple responses to the “Stage\_TNM”, then use a single option (in the order of declining priority):
- stage at time of diagnosis
  - stage at surgery
  - stage at oncology
- c) If “Stage\_TNM” is reported by both the specialist and registry, then use the registry data.
- For peer review only

## Appendix C: Supplementary Tables

**C 1:** Classification of lung cancer -specific symptoms reported by patients into cancer specific and non- cancer specific

### Cancer specific symptoms

|                                               |
|-----------------------------------------------|
| 1 persistent cough                            |
| 2 chest infection that wouldn't get better    |
| 3 coughing up blood-stained phlegm (sputum)   |
| 4 breathlessness                              |
| 5 chest or shoulder pain                      |
| 6 a hoarse voice                              |
| 7 difficulty swallowing                       |
| 8 swelling of lymph nodes (glands) in my neck |
| 9 ends of fingers becoming larger             |
| 10 breast and axilla swelling (in men)        |

### Non-cancer specific symptoms

|                                                                  |
|------------------------------------------------------------------|
| 1 a dull ache or sharp pain when I coughed or took a deep breath |
| 2 pain/discomfort under my ribs                                  |
| 3 face swelling                                                  |
| 4 blood clots (thrombosis)                                       |
| 5 pins and needles or numbness in fingers                        |
| 6 weight loss                                                    |
| 7 felt sick/vomiting/nausea/loss of appetite                     |
| 8 fatigue                                                        |
| 9 muscle weakness                                                |
| 10 drowsiness, weakness, dizziness or confusion                  |
| 11 high temperature (fever) of 38C (100.4F)                      |
| 12 other                                                         |

**C2:** Time intervals (days) depicted as median, 75<sup>th</sup> and 90<sup>th</sup> centiles for each of the ten jurisdictions. In Sweden, no data was available on primary care interval

| Intervals             | Centiles                 | Wales | Denmark | Sweden | England | N Ireland | Scotland | Manitoba | Ontario |
|-----------------------|--------------------------|-------|---------|--------|---------|-----------|----------|----------|---------|
| Patient Interval      | Number                   | 181   | 233     | 172    | 213     | 179       | 169      | 133      | 205     |
|                       | Median                   | 21    | 14      | 21     | 17      | 18        | 21       | 25       | 22      |
|                       | 75 <sup>th</sup> centile | 61    | 53      | 61     | 65      | 60        | 60       | 67       | 61      |
|                       | 90 <sup>th</sup> centile | 216   | 180     | 214    | 205     | 240       | 267      | 180      | 187     |
| Primary Care interval | Number                   | 110   | 159     | n/a    | 147     | 124       | 119      | 80       | 75      |
|                       | Median                   | 20    | 7       |        | 11      | 13        | 16       | 30       | 29      |
|                       | 75 <sup>th</sup> centile | 43    | 20      |        | 31      | 51        | 35       | 75       | 73      |
|                       | 90 <sup>th</sup> centile | 91    | 64      |        | 73      | 112       | 90       | 138      | 183     |
| Diagnostic interval   | Number                   | 176   | 229     | 165    | 212     | 170       | 173      | 138      | 212     |
|                       | Median                   | 45    | 35      | 28     | 54      | 65        | 42       | 87       | 57      |
|                       | 75 <sup>th</sup> centile | 108   | 67      | 83     | 100     | 122       | 106      | 147      | 122     |
|                       | 90 <sup>th</sup> centile | 162   | 162     | 143    | 161     | 281       | 198      | 265      | 331     |
| Treatment interval    | Number                   | 192   | 279     | 190    | 238     | 200       | 187      | 182      | 263     |
|                       | Median                   | 43    | 16      | 34     | 22      | 32        | 42       | 19       | 47      |
|                       | 75 <sup>th</sup> centile | 64    | 25      | 59     | 41      | 48        | 62       | 56       | 70      |
|                       | 90 <sup>th</sup> centile | 89    | 37      | 77     | 56      | 72        | 90       | 97       | 96      |
| Total interval        | Number                   | 147   | 192     | 147    | 176     | 157       | 143      | 117      | 178     |
|                       | Median                   | 116   | 67      | 107    | 114     | 105       | 117      | 127      | 130     |
|                       | 75 <sup>th</sup> centile | 204   | 116     | 190    | 183     | 227       | 253      | 216      | 216     |
|                       | 90 <sup>th</sup> centile | 365   | 210     | 329    | 323     | 365       | 365      | 365      | 339     |

**C3:** Data sources used to define dates and percentage of imputed dates

| Type of date                              | Data sources used to define a date* (%) |     |     |          | Cases with imputed day in a date** (%) |
|-------------------------------------------|-----------------------------------------|-----|-----|----------|----------------------------------------|
|                                           | Patient                                 | PCP | CST | Registry |                                        |
| First noticing symptoms                   | 100                                     | 0   | 0   | 0        | 66                                     |
| First presentation to health care         | 49                                      | 51  | 0   | 0        | 30                                     |
| First referral to secondary care          | 0                                       | 100 | 0   | 0        | 1                                      |
| Diagnosis                                 | 5                                       | 6   | 8   | 81       | 1                                      |
| Start of curative or palliative treatment | 55                                      | 0   | 32  | 13       | 11                                     |

\* based on rules 10-14, supplementary file Appendix B

\*\* based on rule 15, supplementary file Appendix B

\*\*\* Registry/CST medical records on date of treatment were not available for 55% patients, therefore an alternative data source (patient survey) was used instead

**C4.** Percentages of negative intervals set to 0, large intervals (>365 days) set to 365 days, and intervals based not on dates

| Type of interval | Negative intervals set to 0 days* (%) | Intervals >365 days set to 365 days* (%) | Intervals where variables other than dates were used (%)** |
|------------------|---------------------------------------|------------------------------------------|------------------------------------------------------------|
| Patient          | <1                                    | 5                                        | 29                                                         |
| Primary care     | 4                                     | 2                                        | 0                                                          |
| Diagnosis        | 6                                     | 5                                        | 0                                                          |
| Treatment        | 6                                     | <1                                       | 0                                                          |
| Total            | 2                                     | 9                                        | 0                                                          |

\* based on rule 25, supplementary file Appendix B

\* based on rule 20b,c, supplementary file Appendix B

For peer review only

1  
2  
3  
4  
5  
6  
7  
8  
9  
10  
11  
12  
13  
14  
15  
16  
17  
18  
19  
20  
21  
22  
23  
24  
25  
26  
27  
28  
29  
30  
31  
32  
33  
34  
35  
36  
37  
38  
39  
40  
41  
42  
43  
44  
45  
46

For peer review only

**The RECORD statement – checklist of items, extended from the STROBE statement, that should be reported in observational studies using routinely collected health data.**

|                           | Item No. | STROBE items                                                                                                                                                                               | Location in manuscript where items are reported | RECORD items                                                                                                                                                                                                                                                                                                                                                                                                                                | Location in manuscript where items are reported |
|---------------------------|----------|--------------------------------------------------------------------------------------------------------------------------------------------------------------------------------------------|-------------------------------------------------|---------------------------------------------------------------------------------------------------------------------------------------------------------------------------------------------------------------------------------------------------------------------------------------------------------------------------------------------------------------------------------------------------------------------------------------------|-------------------------------------------------|
| <b>Title and abstract</b> |          |                                                                                                                                                                                            |                                                 |                                                                                                                                                                                                                                                                                                                                                                                                                                             |                                                 |
|                           | 1        | (a) Indicate the study's design with a commonly used term in the title or the abstract (b) Provide in the abstract an informative and balanced summary of what was done and what was found | Title and abstract – p 1 and 3                  | RECORD 1.1: The type of data used should be specified in the title or abstract. When possible, the name of the databases used should be included.<br><br>RECORD 1.2: If applicable, the geographic region and timeframe within which the study took place should be reported in the title or abstract.<br><br>RECORD 1.3: If linkage between databases was conducted for the study, this should be clearly stated in the title or abstract. | Abstract – p 3<br><br>Abstract – p 3<br><br>N/A |
| <b>Introduction</b>       |          |                                                                                                                                                                                            |                                                 |                                                                                                                                                                                                                                                                                                                                                                                                                                             |                                                 |
| Background rationale      | 2        | Explain the scientific background and rationale for the investigation being reported                                                                                                       | Introduction – p 6                              |                                                                                                                                                                                                                                                                                                                                                                                                                                             |                                                 |
| Objectives                | 3        | State specific objectives, including any prespecified hypotheses                                                                                                                           | Introduction – p 6                              |                                                                                                                                                                                                                                                                                                                                                                                                                                             |                                                 |
| <b>Methods</b>            |          |                                                                                                                                                                                            |                                                 |                                                                                                                                                                                                                                                                                                                                                                                                                                             |                                                 |
| Study Design              | 4        | Present key elements of study design early in the paper                                                                                                                                    | Methods – p 6                                   |                                                                                                                                                                                                                                                                                                                                                                                                                                             |                                                 |
| Setting                   | 5        | Describe the setting, locations, and relevant dates, including periods of recruitment, exposure, follow-up, and data collection                                                            | Methods – p 6-8                                 |                                                                                                                                                                                                                                                                                                                                                                                                                                             |                                                 |
| Participants              | 6        | (a) <i>Cohort study</i> - Give the eligibility criteria, and the                                                                                                                           | Methods – p 6 – and as reference to             | RECORD 6.1: The methods of study population selection (such as codes or                                                                                                                                                                                                                                                                                                                                                                     | Provided as reference to                        |

|                              |   |                                                                                                                                                                                                                                                                                                                                                                                                                                                                                                                                                                                                                                                             |                                                             |                                                                                                                                                                                                                                                                                                                                                                                                                                                                                                                                                                                                                              |                                                                                                   |
|------------------------------|---|-------------------------------------------------------------------------------------------------------------------------------------------------------------------------------------------------------------------------------------------------------------------------------------------------------------------------------------------------------------------------------------------------------------------------------------------------------------------------------------------------------------------------------------------------------------------------------------------------------------------------------------------------------------|-------------------------------------------------------------|------------------------------------------------------------------------------------------------------------------------------------------------------------------------------------------------------------------------------------------------------------------------------------------------------------------------------------------------------------------------------------------------------------------------------------------------------------------------------------------------------------------------------------------------------------------------------------------------------------------------------|---------------------------------------------------------------------------------------------------|
|                              |   | <p>sources and methods of selection of participants. Describe methods of follow-up</p> <p><i>Case-control study</i> - Give the eligibility criteria, and the sources and methods of case ascertainment and control selection. Give the rationale for the choice of cases and controls</p> <p><i>Cross-sectional study</i> - Give the eligibility criteria, and the sources and methods of selection of participants</p> <p><i>(b) Cohort study</i> - For matched studies, give matching criteria and number of exposed and unexposed</p> <p><i>Case-control study</i> - For matched studies, give matching criteria and the number of controls per case</p> | <p>previous paper.</p> <p>N/A</p>                           | <p>algorithms used to identify subjects) should be listed in detail. If this is not possible, an explanation should be provided.</p> <p>RECORD 6.2: Any validation studies of the codes or algorithms used to select the population should be referenced. If validation was conducted for this study and not published elsewhere, detailed methods and results should be provided.</p> <p>RECORD 6.3: If the study involved linkage of databases, consider use of a flow diagram or other graphical display to demonstrate the data linkage process, including the number of individuals with linked data at each stage.</p> | <p>previous paper.</p> <p>Provided as appendix and in reference to previous paper.</p> <p>N/A</p> |
| Variables                    | 7 | Clearly define all outcomes, exposures, predictors, potential confounders, and effect modifiers. Give diagnostic criteria, if applicable.                                                                                                                                                                                                                                                                                                                                                                                                                                                                                                                   | Methods – p 6-9 – and as reference to previous paper.       | RECORD 7.1: A complete list of codes and algorithms used to classify exposures, outcomes, confounders, and effect modifiers should be provided. If these cannot be reported, an explanation should be provided.                                                                                                                                                                                                                                                                                                                                                                                                              | N/A                                                                                               |
| Data sources/<br>measurement | 8 | For each variable of interest, give sources of data and details of methods of assessment (measurement). Describe comparability of assessment methods if there is more than one group                                                                                                                                                                                                                                                                                                                                                                                                                                                                        | Methods – p 6-9 – and as reference to previous paper.       |                                                                                                                                                                                                                                                                                                                                                                                                                                                                                                                                                                                                                              |                                                                                                   |
| Bias                         | 9 | Describe any efforts to address potential sources of bias                                                                                                                                                                                                                                                                                                                                                                                                                                                                                                                                                                                                   | Methods – p 7-8, discussion – p 24-25 – and as reference to |                                                                                                                                                                                                                                                                                                                                                                                                                                                                                                                                                                                                                              |                                                                                                   |

|                                  |    |                                                                                                                                                                                                                                                                                                                                                                                                                                                                                                                                                                      |                                                       |                                                                                                                                                       |     |
|----------------------------------|----|----------------------------------------------------------------------------------------------------------------------------------------------------------------------------------------------------------------------------------------------------------------------------------------------------------------------------------------------------------------------------------------------------------------------------------------------------------------------------------------------------------------------------------------------------------------------|-------------------------------------------------------|-------------------------------------------------------------------------------------------------------------------------------------------------------|-----|
|                                  |    |                                                                                                                                                                                                                                                                                                                                                                                                                                                                                                                                                                      | previous paper.                                       |                                                                                                                                                       |     |
| Study size                       | 10 | Explain how the study size was arrived at                                                                                                                                                                                                                                                                                                                                                                                                                                                                                                                            | Methods – p 6 – and as reference to previous paper.   |                                                                                                                                                       |     |
| Quantitative variables           | 11 | Explain how quantitative variables were handled in the analyses. If applicable, describe which groupings were chosen, and why                                                                                                                                                                                                                                                                                                                                                                                                                                        | Methods – p 6-8 – and as reference to previous paper. |                                                                                                                                                       |     |
| Statistical methods              | 12 | (a) Describe all statistical methods, including those used to control for confounding<br>(b) Describe any methods used to examine subgroups and interactions<br>(c) Explain how missing data were addressed<br>(d) <i>Cohort study</i> - If applicable, explain how loss to follow-up was addressed<br><i>Case-control study</i> - If applicable, explain how matching of cases and controls was addressed<br><i>Cross-sectional study</i> - If applicable, describe analytical methods taking account of sampling strategy<br>(e) Describe any sensitivity analyses | Methods – p 8 – and as reference to previous paper.   |                                                                                                                                                       |     |
| Data access and cleaning methods |    | ..                                                                                                                                                                                                                                                                                                                                                                                                                                                                                                                                                                   |                                                       | RECORD 12.1: Authors should describe the extent to which the investigators had access to the database population used to create the study population. | N/A |

|                  |    |                                                                                                                                                                                                                                                                                                                                                 |                                                                             |                                                                                                                                                                                                                                                                                                                    |                                                                               |
|------------------|----|-------------------------------------------------------------------------------------------------------------------------------------------------------------------------------------------------------------------------------------------------------------------------------------------------------------------------------------------------|-----------------------------------------------------------------------------|--------------------------------------------------------------------------------------------------------------------------------------------------------------------------------------------------------------------------------------------------------------------------------------------------------------------|-------------------------------------------------------------------------------|
|                  |    |                                                                                                                                                                                                                                                                                                                                                 |                                                                             | RECORD 12.2: Authors should provide information on the data cleaning methods used in the study.                                                                                                                                                                                                                    | Methods – p 7                                                                 |
| Linkage          |    | ..                                                                                                                                                                                                                                                                                                                                              |                                                                             | RECORD 12.3: State whether the study included person-level, institutional-level, or other data linkage across two or more databases. The methods of linkage and methods of linkage quality evaluation should be provided.                                                                                          | N/A                                                                           |
| <b>Results</b>   |    |                                                                                                                                                                                                                                                                                                                                                 |                                                                             |                                                                                                                                                                                                                                                                                                                    |                                                                               |
| Participants     | 13 | (a) Report the numbers of individuals at each stage of the study ( <i>e.g.</i> , numbers potentially eligible, examined for eligibility, confirmed eligible, included in the study, completing follow-up, and analysed)<br>(b) Give reasons for non-participation at each stage.<br>(c) Consider use of a flow diagram                          | Results and as table – p 10-11. Flow diagram in previous paper, referenced. | RECORD 13.1: Describe in detail the selection of the persons included in the study ( <i>i.e.</i> , study population selection) including filtering based on data quality, data availability and linkage. The selection of included persons can be described in the text and/or by means of the study flow diagram. | Results – p 10-15 - and as table. Flow diagram in previous paper, referenced. |
| Descriptive data | 14 | (a) Give characteristics of study participants ( <i>e.g.</i> , demographic, clinical, social) and information on exposures and potential confounders<br>(b) Indicate the number of participants with missing data for each variable of interest<br>(c) <i>Cohort study</i> - summarise follow-up time ( <i>e.g.</i> , average and total amount) | Results and as table – p 10-15.                                             |                                                                                                                                                                                                                                                                                                                    |                                                                               |
| Outcome data     | 15 | <i>Cohort study</i> - Report numbers of outcome events or summary measures over time<br><i>Case-control study</i> - Report numbers in each exposure category, or summary measures                                                                                                                                                               | Results and as table – p 16-23.                                             |                                                                                                                                                                                                                                                                                                                    |                                                                               |

|                   |    |                                                                                                                                                                                                                                                                                                                                                                                                                 |                                 |                                                                                                                                                                                                                                                                                                          |                     |
|-------------------|----|-----------------------------------------------------------------------------------------------------------------------------------------------------------------------------------------------------------------------------------------------------------------------------------------------------------------------------------------------------------------------------------------------------------------|---------------------------------|----------------------------------------------------------------------------------------------------------------------------------------------------------------------------------------------------------------------------------------------------------------------------------------------------------|---------------------|
|                   |    | of exposure<br><i>Cross-sectional study</i> - Report numbers of outcome events or summary measures                                                                                                                                                                                                                                                                                                              |                                 |                                                                                                                                                                                                                                                                                                          |                     |
| Main results      | 16 | (a) Give unadjusted estimates and, if applicable, confounder-adjusted estimates and their precision (e.g., 95% confidence interval). Make clear which confounders were adjusted for and why they were included<br>(b) Report category boundaries when continuous variables were categorized<br>(c) If relevant, consider translating estimates of relative risk into absolute risk for a meaningful time period | Results and as table – p 21-23. |                                                                                                                                                                                                                                                                                                          |                     |
| Other analyses    | 17 | Report other analyses done—e.g., analyses of subgroups and interactions, and sensitivity analyses                                                                                                                                                                                                                                                                                                               | Results – p 23.                 |                                                                                                                                                                                                                                                                                                          |                     |
| <b>Discussion</b> |    |                                                                                                                                                                                                                                                                                                                                                                                                                 |                                 |                                                                                                                                                                                                                                                                                                          |                     |
| Key results       | 18 | Summarise key results with reference to study objectives                                                                                                                                                                                                                                                                                                                                                        | Discussion – p 24               |                                                                                                                                                                                                                                                                                                          |                     |
| Limitations       | 19 | Discuss limitations of the study, taking into account sources of potential bias or imprecision. Discuss both direction and magnitude of any potential bias                                                                                                                                                                                                                                                      | Discussion – p24-25             | RECORD 19.1: Discuss the implications of using data that were not created or collected to answer the specific research question(s). Include discussion of misclassification bias, unmeasured confounding, missing data, and changing eligibility over time, as they pertain to the study being reported. | Discussion – p24-25 |
| Interpretation    | 20 | Give a cautious overall interpretation of results considering objectives, limitations, multiplicity of analyses, results from similar                                                                                                                                                                                                                                                                           | Discussion – p25-28             |                                                                                                                                                                                                                                                                                                          |                     |

|                                                           |    |                                                                                                                                                               |                                  |                                                                                                                                                          |                                                    |
|-----------------------------------------------------------|----|---------------------------------------------------------------------------------------------------------------------------------------------------------------|----------------------------------|----------------------------------------------------------------------------------------------------------------------------------------------------------|----------------------------------------------------|
|                                                           |    | studies, and other relevant evidence                                                                                                                          |                                  |                                                                                                                                                          |                                                    |
| Generalisability                                          | 21 | Discuss the generalisability (external validity) of the study results                                                                                         | Discussion, conclusion – p25-29. |                                                                                                                                                          |                                                    |
| <b>Other Information</b>                                  |    |                                                                                                                                                               |                                  |                                                                                                                                                          |                                                    |
| Funding                                                   | 22 | Give the source of funding and the role of the funders for the present study and, if applicable, for the original study on which the present article is based | Funding statement – p 31         |                                                                                                                                                          |                                                    |
| Accessibility of protocol, raw data, and programming code |    | ..                                                                                                                                                            |                                  | RECORD 22.1: Authors should provide information on how to access any supplemental information such as the study protocol, raw data, or programming code. | Availability of data and material statement – p 31 |

\*Reference: Benchimol EI, Smeeth L, Guttman A, Harron K, Moher D, Petersen I, Sørensen HT, von Elm E, Langan SM, the RECORD Working Committee. The REporting of studies Conducted using Observational Routinely-collected health Data (RECORD) Statement. *PLoS Medicine* 2015; in press.

\*Checklist is protected under Creative Commons Attribution ([CC BY](https://creativecommons.org/licenses/by/4.0/)) license.
